# Supplementary material for: AHR mediates the aflatoxin B1 toxicity associated with hepatocellular carcinoma
Source: Springer Nature journal article supplement (doi:10.1038/s41392-021-00713-1), 2021-08-09
Supplement: MOESM2 [file 41392_2021_713_MOESM2_ESM.xlsx]

## Sheet: Table of Contents
Supplementary Tables
Supplementary Table S1	Selected genes summary from positive CRISPR/Cas9 screening
Supplementary Table S2	Quantification of metabolites in the negative ion mode
Supplementary Table S3	Quantification of metabolites in the positive ion mode
Supplementary Table S4	The RNA-seq annotation between control and AFB1 group
Supplementary Table S5	General information of HCC patients
Supplementary Table S6	List of qPCR primers
Supplementary Table S7	List of siRNA sequence

## Sheet: Supplementary Table S1
Gene	sgRNA	end|beta	end|z	end|p-value	end|fdr	end|wald-p-value	end|wald-fdr
IGFBP6	4	0.4454	119.02	0.18879	0.9278	0	0
ADCY4	4	0.47296	126.36	0.1643	0.91613	0	0
TMEM247	4	0.20249	280.2	0.51414	0.97643	0	0
SCAMP3	4	0.14779	204.54	0.60901	0.97893	0	0
AHR	4	2.7051	37.327	0	0	6.03e-305	2.3e-301
Non-Targeting	1000	0.14549	30.669	0.61313	0.97893	1.49e-206	4.76e-203
POR	4	2.0169	27.504	0	0	1.56e-166	4.25e-163
NARFL	4	-2.3403	-25.855	0.0015904	0.56	2.13e-147	5.08e-144
KEAP1	4	1.747	23.88	0	0	4.93e-126	1.05e-122
SRP54	4	-2.6785	-23.139	0.00087889	0.48	1.89e-118	3.61e-115
VPS28	4	-2.3568	-23.104	0.0015067	0.56	4.21e-118	7.31e-115
NBPF9	4	-2.3207	-22.618	0.0017264	0.57966	2.86e-113	4.56e-110
SMU1	4	-2.352	-22.272	0.0015276	0.56	6.97e-110	1.02e-106
RPS8	4	-2.5738	-22.267	0.0010044	0.52	7.67e-110	1.05e-106
SAFB	4	1.6502	22.262	0	0	8.59e-110	1.1e-106
ALG10B	4	-2.9249	-22.058	0.00071148	0.4375	7.94e-108	9.48e-105
RPS3A	4	-2.2505	-22.006	0.0021031	0.58933	2.51e-107	2.83e-104
RPS24	4	-2.3353	-21.823	0.0016113	0.56	1.41e-105	1.5e-102
RPE65	4	-2.1086	-21.286	0.0031075	0.6	1.51e-100	1.52e-97
BCL2L1	4	-2.2382	-21.268	0.0021868	0.58933	2.24e-100	2.14e-97
POLR2C	4	-2.5408	-21.196	0.0010777	0.52	1.05e-99	9.52e-97
SF3B4	4	-1.9296	-20.949	0.0052315	0.61455	1.93e-97	1.68e-94
TMED10	4	-2.0836	-20.771	0.0033586	0.6	7.89e-96	6.55e-93
HSPA5	4	-1.6548	-20.593	0.011457	0.66131	3.16e-94	2.52e-91
NXF1	4	-1.7345	-20.368	0.009197	0.65201	3.22e-92	2.46e-89
UBE2K	4	-2.5356	-20.308	0.0010882	0.52	1.09e-91	8.04e-89
LRRK2	4	-2.1802	-20.25	0.0026053	0.5977	3.54e-91	2.51e-88
IFITM1	4	-2.5575	-20.23	0.0010358	0.52	5.37e-91	3.67e-88
ALAS1	4	1.5024	20.164	2.09e-05	0.057143	2.02e-90	1.33e-87
PRPF8	4	-1.8824	-20.13	0.0060581	0.63046	3.99e-90	2.54e-87
PRPF4B	4	-2.376	-20.011	0.001423	0.56	4.38e-89	2.7e-86
POMT1	4	-2.0292	-20.007	0.0039236	0.61455	4.78e-89	2.86e-86
COPE	4	-2.1825	-19.99	0.0025739	0.5977	6.73e-89	3.9e-86
SLC38A3	4	-1.8056	-19.779	0.0074392	0.64202	4.51e-87	2.54e-84
PGAP1	4	-1.9958	-19.673	0.0043212	0.61455	3.66e-86	2e-83
MED29	4	-2.0261	-19.666	0.0039655	0.61455	4.22e-86	2.24e-83
DUS2	4	-2.033	-19.613	0.0038922	0.61455	1.19e-85	6.16e-83
FBLN7	4	-2.0018	-19.599	0.004227	0.61455	1.58e-85	7.92e-83
DMP1	4	-2.0959	-19.596	0.0032331	0.6	1.66e-85	8.13e-83
DEFB118	4	-2.0127	-19.588	0.0041015	0.61455	1.98e-85	9.44e-83
POLR2G	4	-2.564	-19.561	0.0010149	0.52	3.31e-85	1.54e-82
SALL1	4	-1.9265	-19.469	0.0052629	0.61455	2.02e-84	9.13e-82
SF3B3	4	-1.742	-19.468	0.0089982	0.65201	2.05e-84	9.13e-82
CNOT3	4	-2.342	-19.38	0.0015694	0.56	1.13e-83	4.93e-81
THEMIS	4	-2.0625	-19.361	0.0036725	0.61455	1.66e-83	7.06e-81
TAF6	4	-2.1043	-19.312	0.0031494	0.6	4.29e-83	1.78e-80
MFAP4	4	-2.0505	-19.262	0.0037144	0.61455	1.12e-82	4.57e-80
SNRPF	4	-1.9894	-19.253	0.0044049	0.61455	1.34e-82	5.33e-80
SF3B5	4	-1.6913	-19.226	0.010233	0.65201	2.24e-82	8.74e-80
ZNF705A	4	-1.8281	-19.219	0.0070102	0.64202	2.59e-82	9.9e-80
CLEC4C	4	-1.9803	-19.195	0.0045619	0.61455	4.05e-82	1.52e-79
LRP1	4	-2.0201	-19.077	0.0040387	0.61455	3.94e-81	1.45e-78
SNN	4	-1.8776	-19.044	0.0061732	0.63046	7.4e-81	2.67e-78
POSTN	4	-2.3625	-19.025	0.0014753	0.56	1.05e-80	3.71e-78
FRAT1	4	-2.2386	-19.01	0.0021763	0.58933	1.4e-80	4.86e-78
NLGN3	4	-1.6687	-18.981	0.010976	0.65201	2.45e-80	8.35e-78
FAM107A	4	-2.0946	-18.886	0.0032331	0.6	1.5e-79	5.03e-77
EI24	4	1.6244	18.85	0	0	2.95e-79	9.74e-77
DECR1	4	-1.6821	-18.795	0.010473	0.65201	8.27e-79	2.68e-76
CYP1A1	4	1.552	18.77	0	0	1.34e-78	4.26e-76
IFNL1	4	-1.6827	-18.763	0.010463	0.65201	1.5e-78	4.72e-76
BOD1L2	4	-1.5708	-18.702	0.014219	0.6812	4.78e-78	1.48e-75
43720	4	-1.9499	-18.664	0.004949	0.61455	9.73e-78	2.95e-75
SLFN13	4	-1.9909	-18.57	0.0043945	0.61455	5.62e-77	1.68e-74
TRIP6	4	-2.1509	-18.492	0.0028355	0.6	2.41e-76	7.09e-74
COPS7B	4	-2.3199	-18.462	0.0017473	0.57966	4.15e-76	1.2e-73
LRRC14	4	-2.2923	-18.442	0.0018833	0.58933	6.04e-76	1.72e-73
SPDYE2	4	-1.8283	-18.429	0.0070102	0.64202	7.73e-76	2.17e-73
RPL17	4	-1.9032	-18.408	0.0057233	0.62874	1.13e-75	3.14e-73
ATP5J2	4	-2.0028	-18.374	0.0042166	0.61455	2.13e-75	5.81e-73
COPB2	4	-4.4578	-18.347	0.00043945	0.4	3.5e-75	9.43e-73
SUN5	4	-1.6674	-18.326	0.010976	0.65201	5.09e-75	1.35e-72
MXI1	4	-1.7607	-18.322	0.0085378	0.65059	5.48e-75	1.43e-72
OR4F5	4	-1.7726	-18.293	0.0082344	0.65041	9.4e-75	2.43e-72
PRKAG2	4	-1.9248	-18.281	0.0053047	0.61455	1.17e-74	2.98e-72
ATL2	4	-1.876	-18.276	0.0061732	0.63046	1.29e-74	3.25e-72
KHDRBS1	4	-2.1331	-18.172	0.002961	0.6	8.6e-74	2.14e-71
TOX2	4	-2.1046	-18.16	0.0031494	0.6	1.06e-73	2.6e-71
ZNF648	4	-1.7397	-18.067	0.0090923	0.65201	5.82e-73	1.41e-70
NUP54	4	-3.2627	-18.045	0.00065917	0.42667	8.57e-73	2.05e-70
PTS	4	-1.7907	-18.044	0.0078159	0.64202	8.84e-73	2.09e-70
DUX4	4	-2.1217	-18.033	0.0030447	0.6	1.07e-72	2.5e-70
NUS1	4	-1.6759	-18.02	0.010683	0.65201	1.35e-72	3.1e-70
MOXD1	4	-2.1372	-17.982	0.0029401	0.6	2.68e-72	6.11e-70
SUPT5H	4	-1.5552	-17.961	0.014899	0.68873	3.92e-72	8.82e-70
FAM96B	4	-2.2373	-17.956	0.0021868	0.58933	4.27e-72	9.42e-70
TREH	4	-1.825	-17.956	0.0070939	0.64202	4.29e-72	9.42e-70
RAN	4	-1.785	-17.934	0.0079414	0.64202	6.36e-72	1.38e-69
ISX	4	-1.7384	-17.917	0.0091133	0.65201	8.71e-72	1.87e-69
KNG1	4	-1.86	-17.86	0.0064975	0.63046	2.4e-71	5.09e-69
EIF1AD	4	-1.8754	-17.845	0.0061732	0.63046	3.17e-71	6.67e-69
HSPB6	4	-1.7876	-17.841	0.0078786	0.64202	3.41e-71	7.03e-69
TRAF5	4	-1.954	-17.84	0.0048862	0.61455	3.45e-71	7.03e-69
RBMS1	4	-1.9383	-17.84	0.0051059	0.61455	3.46e-71	7.03e-69
LIN7A	4	-2.2225	-17.823	0.0023123	0.58933	4.68e-71	9.42e-69
DNAL1	4	-1.6803	-17.782	0.010568	0.65201	9.75e-71	1.94e-68
LY6G6F	4	-1.7334	-17.764	0.0092388	0.65201	1.34e-70	2.64e-68
UNC5C	4	-2.1958	-17.756	0.0025111	0.5977	1.55e-70	3.02e-68
UBA6	4	-1.678	-17.746	0.01062	0.65201	1.86e-70	3.59e-68
CERS2	4	-1.8598	-17.693	0.0064975	0.63046	4.77e-70	9.13e-68
GALNS	4	-1.7144	-17.684	0.0096887	0.65201	5.54e-70	1.05e-67
SNRPG	4	-1.8673	-17.672	0.0063196	0.63046	6.92e-70	1.3e-67
ATR	4	-1.7914	-17.634	0.0078054	0.64202	1.36e-69	2.52e-67
SLC38A7	4	-1.8649	-17.627	0.0063615	0.63046	1.52e-69	2.8e-67
EMC3	4	-1.8001	-17.625	0.0075961	0.64202	1.57e-69	2.86e-67
B4GALNT2	4	-1.5916	-17.605	0.013445	0.67769	2.25e-69	4.06e-67
ENSA	4	-2.2726	-17.596	0.0019566	0.58933	2.66e-69	4.75e-67
LAT2	4	-2.1198	-17.581	0.0030552	0.6	3.45e-69	6.1e-67
SEC23IP	4	-1.9098	-17.562	0.0056082	0.62197	4.82e-69	8.38e-67
CCM2	4	-1.776	-17.562	0.0081297	0.64481	4.82e-69	8.38e-67
IGFLR1	4	-1.686	-17.554	0.0104	0.65201	5.54e-69	9.55e-67
DDB1	4	-2.1292	-17.523	0.0030029	0.6	9.49e-69	1.62e-66
PCBP1	4	-1.6442	-17.522	0.011739	0.66391	9.68e-69	1.64e-66
MARVELD2	4	-1.5257	-17.519	0.016291	0.69644	1.03e-68	1.73e-66
CHD4	4	-1.5963	-17.471	0.013278	0.67769	2.37e-68	3.95e-66
TMEM109	4	-1.5917	-17.434	0.013445	0.67769	4.54e-68	7.48e-66
ZNF425	4	1.3389	17.369	0.00017787	0.33333	1.41e-67	2.31e-65
MAOA	4	-1.8433	-17.356	0.0067486	0.63861	1.78e-67	2.88e-65
EVA1B	4	-2.3142	-17.349	0.0017892	0.57966	2.02e-67	3.24e-65
SNAI1	4	-1.7562	-17.295	0.0086006	0.65059	5.16e-67	8.21e-65
PSMD6	4	-1.477	-17.288	0.019053	0.7025	5.75e-67	9.08e-65
CDK1	4	-1.7498	-17.279	0.0087784	0.65201	6.81e-67	1.07e-64
POLD2	4	-1.7853	-17.264	0.0079414	0.64202	8.73e-67	1.36e-64
WDR83	4	1.2939	17.211	0.0002825	0.375	2.18e-66	3.37e-64
OAS1	4	-1.7498	-17.172	0.0087784	0.65201	4.31e-66	6.59e-64
ENO4	4	-1.6992	-17.162	0.010013	0.65201	5.13e-66	7.79e-64
HNRNPCL2	4	-1.6499	-17.134	0.011572	0.66131	8.25e-66	1.24e-63
PCF11	4	-1.5922	-17.116	0.013424	0.67769	1.12e-65	1.67e-63
GPR31	4	-1.7226	-17.114	0.0094481	0.65201	1.17e-65	1.74e-63
PLOD1	4	-1.464	-17.097	0.019827	0.70567	1.57e-65	2.31e-63
HELB	4	-2.1208	-17.096	0.0030552	0.6	1.6e-65	2.33e-63
RPS14	4	-1.8687	-17.082	0.0062987	0.63046	2.01e-65	2.9e-63
FILIP1	4	-1.7444	-17.067	0.0088935	0.65201	2.63e-65	3.78e-63
ST13	4	-1.7004	-17.058	0.0099817	0.65201	3.04e-65	4.34e-63
MDC1	4	-2.0525	-17.026	0.0037144	0.61455	5.31e-65	7.52e-63
OR5M9	4	-1.7012	-16.973	0.0099608	0.65201	1.31e-64	1.82e-62
TAF8	4	-1.3991	-16.973	0.023427	0.71674	1.31e-64	1.82e-62
TSPY2	4	-1.672	-16.965	0.010871	0.65201	1.49e-64	2.06e-62
CAMKK2	4	-1.5934	-16.928	0.013361	0.67769	2.81e-64	3.87e-62
ONECUT1	4	1.251	16.925	0.00042898	0.4	2.96e-64	4.04e-62
KDM4E	4	-2.3599	-16.912	0.0014962	0.56	3.66e-64	4.96e-62
ALDH1L2	4	-2.1262	-16.846	0.0030238	0.6	1.13e-63	1.51e-61
POLR2L	4	-1.405	-16.815	0.023008	0.71674	1.89e-63	2.53e-61
OR13C8	4	-1.5475	-16.813	0.015286	0.69333	1.98e-63	2.62e-61
CSTA	4	-1.7051	-16.806	0.009898	0.65201	2.2e-63	2.9e-61
SLC9A5	4	-1.5343	-16.799	0.015914	0.69644	2.47e-63	3.23e-61
ZNRF2	4	-1.6812	-16.775	0.010505	0.65201	3.73e-63	4.85e-61
ANKRD22	4	-1.6864	-16.756	0.01039	0.65201	5.08e-63	6.56e-61
TFRC	4	-1.5367	-16.726	0.015768	0.69333	8.54e-63	1.1e-60
FNDC3A	4	-1.791	-16.705	0.0078159	0.64202	1.21e-62	1.54e-60
C2orf71	4	-1.6536	-16.696	0.01152	0.66131	1.41e-62	1.78e-60
CRACR2A	4	-1.9193	-16.683	0.0053884	0.61677	1.73e-62	2.18e-60
NDOR1	4	-1.6261	-16.682	0.012336	0.6691	1.78e-62	2.22e-60
EHD1	4	-2.2389	-16.65	0.0021763	0.58933	3.04e-62	3.78e-60
TIMELESS	4	-1.4721	-16.647	0.019315	0.70321	3.16e-62	3.9e-60
ECD	4	-1.7888	-16.618	0.0078577	0.64202	5.13e-62	6.29e-60
BAALC	4	-1.5784	-16.601	0.013979	0.6812	6.81e-62	8.29e-60
PLEKHA2	4	-1.5284	-16.592	0.016155	0.69644	7.93e-62	9.6e-60
TG	4	-1.8798	-16.583	0.0061208	0.63046	9.23e-62	1.11e-59
NUTM2A	4	-1.6566	-16.553	0.011426	0.66131	1.53e-61	1.83e-59
NBAS	4	-1.898	-16.522	0.0058383	0.63046	2.56e-61	3.04e-59
TUBB	4	-1.5913	-16.515	0.013466	0.67769	2.85e-61	3.36e-59
PPP1R14A	4	-1.6651	-16.514	0.011101	0.65494	2.89e-61	3.39e-59
HDAC6	4	-1.5183	-16.508	0.016584	0.70109	3.23e-61	3.77e-59
POLR2F	4	-1.5113	-16.502	0.016971	0.70232	3.52e-61	4.08e-59
FBXO34	4	-1.4036	-16.457	0.023123	0.71674	7.45e-61	8.58e-59
ASAP2	4	1.3242	16.426	0.0001988	0.33333	1.24e-60	1.42e-58
TAF5	4	-1.9341	-16.416	0.0051583	0.61455	1.46e-60	1.66e-58
KCMF1	4	-1.7068	-16.412	0.0098771	0.65201	1.57e-60	1.77e-58
DDX19A	4	-1.443	-16.362	0.020863	0.70941	3.59e-60	4.03e-58
C4orf3	4	-1.653	-16.329	0.01152	0.66131	6.15e-60	6.87e-58
ATF6	4	-1.3697	-16.316	0.025446	0.72168	7.65e-60	8.5e-58
ATP4A	4	-1.3045	-16.3	0.03118	0.7562	9.83e-60	1.09e-57
PDGFA	4	-1.4689	-16.29	0.019566	0.70433	1.16e-59	1.27e-57
ST3GAL5	4	-1.8292	-16.29	0.0069997	0.64202	1.16e-59	1.27e-57
SUMO2	4	-1.8982	-16.289	0.0058383	0.63046	1.18e-59	1.28e-57
MTX3	4	-1.7109	-16.287	0.009762	0.65201	1.23e-59	1.33e-57
CR1L	4	-1.5256	-16.263	0.016291	0.69644	1.81e-59	1.94e-57
AP5Z1	4	-1.4475	-16.26	0.020654	0.7088	1.89e-59	2.02e-57
UTF1	4	-1.7588	-16.257	0.0085796	0.65059	1.99e-59	2.12e-57
EIF4ENIF1	4	-1.679	-16.244	0.010599	0.65201	2.45e-59	2.59e-57
GPR155	4	-1.6052	-16.232	0.012985	0.67769	3e-59	3.15e-57
SHANK1	4	-1.5469	-16.219	0.015297	0.69333	3.7e-59	3.87e-57
ODF4	4	-1.6494	-16.213	0.011593	0.66131	4.1e-59	4.26e-57
RPS21	4	-1.6084	-16.2	0.012859	0.67713	5.02e-59	5.18e-57
XPO1	4	-1.8193	-16.193	0.0072299	0.64202	5.63e-59	5.78e-57
SETD1A	4	-1.6724	-16.189	0.01085	0.65201	5.99e-59	6.12e-57
VCPKMT	4	-1.6289	-16.179	0.012252	0.6691	7.11e-59	7.23e-57
PAH	4	-1.6906	-16.169	0.010254	0.65201	8.29e-59	8.39e-57
MYH7B	4	-1.6818	-16.163	0.010494	0.65201	9.18e-59	9.23e-57
URI1	4	-1.3518	-16.144	0.026963	0.73203	1.26e-58	1.26e-56
CREG2	4	-1.6558	-16.127	0.011436	0.66131	1.64e-58	1.63e-56
ARL9	4	-1.7797	-16.121	0.0079937	0.64202	1.82e-58	1.8e-56
TRIM24	4	-1.5421	-16.11	0.015527	0.69333	2.15e-58	2.12e-56
GTF2E2	4	-1.4703	-16.09	0.01944	0.70321	3.01e-58	2.95e-56
NAV3	4	-1.3092	-16.089	0.030782	0.75538	3.06e-58	2.98e-56
VSIG8	4	-1.5905	-16.059	0.013508	0.67769	4.96e-58	4.81e-56
MRPL52	4	-1.4357	-16.037	0.02124	0.71469	7e-58	6.76e-56
MB	4	-1.4905	-16.035	0.018143	0.7025	7.23e-58	6.95e-56
EML1	4	-1.7669	-16.033	0.0084122	0.65059	7.5e-58	7.17e-56
TSR2	4	-1.9659	-16.013	0.0047607	0.61455	1.04e-57	9.88e-56
RAB37	4	-1.9339	-16.01	0.0051583	0.61455	1.08e-57	1.03e-55
ATP5J2-PTCD1	4	-1.7903	-16.008	0.0078159	0.64202	1.12e-57	1.05e-55
POLR3G	4	-1.781	-15.972	0.0079833	0.64202	2.02e-57	1.89e-55
TXN	4	-1.737	-15.97	0.0091447	0.65201	2.07e-57	1.93e-55
ZCCHC9	4	-1.3325	-15.951	0.028627	0.74073	2.82e-57	2.62e-55
RPL41	4	-1.3346	-15.939	0.028428	0.74073	3.4e-57	3.14e-55
TSPYL6	4	-1.2367	-15.93	0.038274	0.78008	3.91e-57	3.59e-55
C12orf42	4	-1.9245	-15.93	0.0053047	0.61455	3.94e-57	3.6e-55
NAA35	4	-1.7644	-15.911	0.0084646	0.65059	5.35e-57	4.87e-55
PIP5K1A	4	-1.9563	-15.898	0.0048234	0.61455	6.57e-57	5.95e-55
FBXO24	4	-1.3633	-15.887	0.02598	0.72168	7.79e-57	7.02e-55
PRPF38A	4	-1.4963	-15.871	0.017871	0.7025	1.01e-56	9.06e-55
USF2	4	-1.5912	-15.86	0.013466	0.67769	1.21e-56	1.08e-54
RASA3	4	-1.3108	-15.833	0.030646	0.75538	1.84e-56	1.63e-54
IFNA8	4	-2.1643	-15.811	0.0027099	0.5977	2.63e-56	2.33e-54
SMPD1	4	-1.4005	-15.804	0.023301	0.71674	2.92e-56	2.57e-54
NPIPA7	4	-1.8445	-15.785	0.0067068	0.63861	3.97e-56	3.48e-54
VSX2	4	-1.5467	-15.758	0.015318	0.69333	6.02e-56	5.25e-54
RPS11	4	-1.3039	-15.749	0.031253	0.7562	7.03e-56	6.11e-54
HRASLS	4	-1.4381	-15.732	0.021125	0.71252	9.11e-56	7.88e-54
OLAH	4	-1.6245	-15.712	0.01242	0.6691	1.25e-55	1.08e-53
C17orf107	4	-1.7192	-15.71	0.0095527	0.65201	1.28e-55	1.1e-53
NMUR2	4	-2.0141	-15.705	0.0040806	0.61455	1.41e-55	1.2e-53
ZNF655	4	-1.6113	-15.695	0.012796	0.67713	1.63e-55	1.39e-53
P3H1	4	-1.533	-15.688	0.015967	0.69644	1.83e-55	1.55e-53
LOC81691	4	-1.6402	-15.674	0.011875	0.66628	2.29e-55	1.93e-53
CDH8	4	-2.8534	-15.66	0.00073241	0.4375	2.83e-55	2.37e-53
GCC1	4	-1.5849	-15.629	0.013717	0.68104	4.64e-55	3.87e-53
PDCD11	4	-1.3811	-15.623	0.024546	0.72074	5.09e-55	4.23e-53
FBXW7	4	-1.5168	-15.622	0.016657	0.70109	5.14e-55	4.25e-53
NKAP	4	-1.3935	-15.613	0.023793	0.71674	5.97e-55	4.92e-53
LRRC48	4	-1.3745	-15.605	0.025038	0.72168	6.69e-55	5.49e-53
CHIC2	4	-1.5458	-15.595	0.015349	0.69333	7.93e-55	6.48e-53
PTPRC	4	-1.6254	-15.583	0.012357	0.6691	9.46e-55	7.69e-53
DUSP6	4	-1.7063	-15.562	0.0098875	0.65201	1.32e-54	1.07e-52
TRPC4	4	-1.5906	-15.552	0.013487	0.67769	1.55e-54	1.25e-52
CD300LG	4	-1.4823	-15.552	0.018676	0.7025	1.55e-54	1.25e-52
MRPL12	4	-1.4704	-15.538	0.01944	0.70321	1.93e-54	1.54e-52
GLS	4	-1.4145	-15.523	0.022433	0.71674	2.41e-54	1.92e-52
BUD31	4	-1.3324	-15.523	0.028637	0.74073	2.42e-54	1.92e-52
PF4V1	4	-1.4135	-15.515	0.022516	0.71674	2.76e-54	2.18e-52
ZNF697	4	-1.3594	-15.506	0.026293	0.72414	3.17e-54	2.5e-52
WBP2NL	4	-1.692	-15.5	0.010201	0.65201	3.45e-54	2.7e-52
SUOX	4	-1.3398	-15.498	0.027988	0.73895	3.56e-54	2.77e-52
DDAH1	4	-1.9284	-15.498	0.0052524	0.61455	3.58e-54	2.78e-52
ATIC	4	1.3123	15.481	0.00020926	0.33333	4.66e-54	3.61e-52
KCNK18	4	-1.3535	-15.47	0.026806	0.732	5.51e-54	4.24e-52
ZNF211	4	-1.4817	-15.47	0.018718	0.7025	5.54e-54	4.25e-52
TOMM34	4	-1.5742	-15.458	0.014094	0.6812	6.69e-54	5.12e-52
BRS3	4	-1.4701	-15.455	0.019461	0.70321	6.95e-54	5.29e-52
EIF4E2	4	-1.5877	-15.443	0.013654	0.68104	8.39e-54	6.37e-52
ZNHIT3	4	-1.4777	-15.44	0.019011	0.7025	8.76e-54	6.62e-52
PRR7	4	-1.4255	-15.44	0.021753	0.71674	8.83e-54	6.64e-52
GGA2	4	-1.5242	-15.391	0.016333	0.69644	1.88e-53	1.41e-51
VPS4A	4	-1.4601	-15.382	0.019995	0.70567	2.18e-53	1.62e-51
SAE1	4	-1.3118	-15.381	0.030552	0.75538	2.19e-53	1.63e-51
GEMIN6	4	-1.7498	-15.379	0.0087784	0.65201	2.26e-53	1.67e-51
HIST1H3B	4	-1.5404	-15.377	0.015621	0.69333	2.32e-53	1.71e-51
GUCY1A3	4	1.1718	15.356	0.00087889	0.48	3.22e-53	2.37e-51
NFS1	4	-1.3737	-15.348	0.025069	0.72168	3.65e-53	2.68e-51
AAED1	4	-1.5221	-15.347	0.016375	0.69644	3.69e-53	2.69e-51
PHAX	4	-1.5725	-15.347	0.014177	0.6812	3.71e-53	2.7e-51
ZNF781	4	-1.5284	-15.329	0.016155	0.69644	4.9e-53	3.55e-51
RRM2	4	-1.4891	-15.327	0.018247	0.7025	5.03e-53	3.63e-51
PRMT7	4	-1.7167	-15.318	0.0096155	0.65201	5.84e-53	4.2e-51
FLRT1	4	-1.4765	-15.302	0.019074	0.7025	7.36e-53	5.27e-51
BPIFB6	4	-4.5559	-15.284	0.00039759	0.4	9.79e-53	6.99e-51
NAPA	4	-1.2886	-15.271	0.032665	0.75981	1.2e-52	8.53e-51
ETF1	4	-1.4233	-15.257	0.021878	0.71674	1.49e-52	1.05e-50
SPRYD4	4	-1.4433	-15.249	0.020863	0.70941	1.66e-52	1.17e-50
SIGLEC15	4	-1.4148	-15.244	0.022433	0.71674	1.81e-52	1.27e-50
ASIC5	4	-1.4519	-15.241	0.020382	0.70758	1.9e-52	1.33e-50
SEC16A	4	-1.4671	-15.232	0.01966	0.70567	2.18e-52	1.52e-50
STUB1	4	-1.4882	-15.23	0.018342	0.7025	2.22e-52	1.54e-50
ZNF852	4	-1.5409	-15.219	0.0156	0.69333	2.63e-52	1.82e-50
ELAC1	4	-1.5712	-15.204	0.014219	0.6812	3.34e-52	2.3e-50
HNRNPA1	4	-1.4322	-15.181	0.021386	0.71469	4.73e-52	3.25e-50
SNRPD3	4	-1.3843	-15.173	0.024316	0.72062	5.37e-52	3.68e-50
HIST2H2AB	4	-1.3479	-15.147	0.027298	0.73203	7.89e-52	5.39e-50
BAZ2A	4	-1.3795	-15.141	0.024745	0.72104	8.74e-52	5.94e-50
LAMA4	4	-1.4026	-15.121	0.023176	0.71674	1.17e-51	7.94e-50
CYP3A5	4	-1.5862	-15.112	0.013696	0.68104	1.34e-51	9.07e-50
GOT1L1	4	-1.3117	-15.109	0.030552	0.75538	1.42e-51	9.58e-50
RPS6KC1	4	-1.5241	-15.107	0.016343	0.69644	1.46e-51	9.79e-50
EXD1	4	1.1734	15.106	0.00086843	0.48	1.47e-51	9.86e-50
MOCS3	4	-1.5084	-15.094	0.017222	0.70232	1.79e-51	1.19e-49
TNFRSF8	4	-1.4594	-15.093	0.020037	0.70567	1.79e-51	1.19e-49
CCNA2	4	-1.4989	-15.07	0.017735	0.7025	2.53e-51	1.67e-49
EDEM2	4	-1.3633	-15.069	0.02598	0.72168	2.59e-51	1.71e-49
UGT2A3	4	-1.7396	-15.063	0.0091028	0.65201	2.82e-51	1.86e-49
S100A3	4	-1.2544	-15.057	0.03616	0.76993	3.12e-51	2.04e-49
PRF1	4	-1.5668	-15.049	0.014366	0.68308	3.48e-51	2.27e-49
KDM4B	4	-1.3705	-15.041	0.025415	0.72168	3.96e-51	2.58e-49
WNT10B	4	-1.5813	-15.033	0.013853	0.6812	4.44e-51	2.88e-49
GMPPA	4	-1.3821	-15.015	0.024515	0.72074	5.82e-51	3.76e-49
CASC1	4	-1.7835	-15.004	0.0079833	0.64202	6.88e-51	4.43e-49
GALT	4	-1.5131	-14.987	0.016877	0.70232	8.94e-51	5.73e-49
FNBP1L	4	-1.5977	-14.982	0.013246	0.67769	9.62e-51	6.15e-49
YARS2	4	-1.2671	-14.933	0.034769	0.76318	2e-50	1.28e-48
ANXA3	4	-1.8013	-14.909	0.0075229	0.64202	2.88e-50	1.83e-48
CWF19L2	4	1.2135	14.907	0.00061732	0.42143	2.96e-50	1.87e-48
HABP2	4	-1.3938	-14.891	0.023772	0.71674	3.75e-50	2.36e-48
MRPS18B	4	-1.2542	-14.88	0.03616	0.76993	4.44e-50	2.79e-48
GDF9	4	-1.4826	-14.871	0.018666	0.7025	5.06e-50	3.17e-48
GABRA4	4	-1.4808	-14.869	0.01876	0.7025	5.23e-50	3.27e-48
SHFM1	4	-1.2782	-14.862	0.033565	0.75981	5.84e-50	3.64e-48
CCDC85B	4	-1.2677	-14.831	0.034706	0.76318	9.17e-50	5.69e-48
LRFN4	4	-1.2573	-14.831	0.035731	0.76742	9.25e-50	5.72e-48
RAB29	4	-1.9401	-14.828	0.0050745	0.61455	9.7e-50	5.98e-48
NTM	4	-1.5547	-14.813	0.01492	0.68873	1.2e-49	7.37e-48
ARHGAP12	4	-1.5671	-14.809	0.014355	0.68308	1.29e-49	7.87e-48
SLC25A28	4	-1.4603	-14.809	0.019984	0.70567	1.29e-49	7.87e-48
PLEKHG6	4	-1.4554	-14.804	0.020194	0.70567	1.38e-49	8.4e-48
DDX3X	4	-1.4726	-14.804	0.019283	0.70321	1.38e-49	8.4e-48
PLCB3	4	-1.3625	-14.795	0.026032	0.72168	1.59e-49	9.59e-48
TUT1	4	-1.286	-14.77	0.032927	0.75981	2.3e-49	1.39e-47
CRYGN	4	-1.4858	-14.764	0.018446	0.7025	2.51e-49	1.51e-47
C11orf95	4	-1.1717	-14.753	0.046278	0.79462	2.93e-49	1.75e-47
SUV420H1	4	-1.6815	-14.752	0.010494	0.65201	2.97e-49	1.77e-47
MYC	4	1.1059	14.745	0.0015694	0.56	3.32e-49	1.98e-47
HUS1B	4	-1.4018	-14.73	0.023217	0.71674	4.17e-49	2.47e-47
APOBEC3G	4	-1.3749	-14.727	0.025017	0.72168	4.35e-49	2.58e-47
CCDC3	4	-1.4246	-14.72	0.021805	0.71674	4.82e-49	2.84e-47
ARMC7	4	-1.2639	-14.713	0.035082	0.76318	5.3e-49	3.12e-47
TCTN1	4	-1.5524	-14.71	0.014993	0.68873	5.53e-49	3.24e-47
PLCZ1	4	-1.759	-14.71	0.0085796	0.65059	5.6e-49	3.27e-47
TMEM119	4	-1.2963	-14.708	0.031923	0.75981	5.71e-49	3.33e-47
PSMA6	4	-1.876	-14.689	0.0061732	0.63046	7.6e-49	4.41e-47
CCL2	4	1.1143	14.678	0.0014544	0.56	8.86e-49	5.13e-47
FCRL6	4	-1.3934	-14.666	0.023803	0.71674	1.06e-48	6.11e-47
PUF60	4	-1.3132	-14.666	0.030405	0.75538	1.06e-48	6.13e-47
OTUD5	4	-1.2044	-14.652	0.042019	0.79209	1.32e-48	7.56e-47
PSMB7	4	-1.3494	-14.647	0.027183	0.73203	1.4e-48	8.03e-47
INSIG1	4	-1.4879	-14.637	0.018342	0.7025	1.62e-48	9.26e-47
WFDC3	4	-1.3364	-14.63	0.028302	0.74073	1.82e-48	1.04e-46
MT2A	4	-1.1993	-14.622	0.042668	0.79209	2.02e-48	1.15e-46
FAM189B	4	-1.3989	-14.606	0.023458	0.71674	2.56e-48	1.45e-46
ACAD10	4	-1.4807	-14.606	0.018781	0.7025	2.59e-48	1.46e-46
IQCA1L	4	-1.2577	-14.597	0.035668	0.76693	2.95e-48	1.66e-46
ZNF676	4	-1.6916	-14.584	0.010212	0.65201	3.57e-48	2e-46
VARS	4	-1.1965	-14.574	0.042971	0.79209	4.12e-48	2.3e-46
TMEM64	4	-1.313	-14.568	0.030405	0.75538	4.47e-48	2.49e-46
ANKLE1	4	1.0968	14.546	0.0017787	0.57966	6.19e-48	3.44e-46
ADCY6	4	-1.3086	-14.545	0.030824	0.75538	6.26e-48	3.47e-46
ZCCHC4	4	-1.157	-14.543	0.048758	0.80341	6.51e-48	3.6e-46
FCN2	4	-1.2946	-14.541	0.03208	0.75981	6.65e-48	3.66e-46
MRPL15	4	-1.2736	-14.529	0.034005	0.76079	7.99e-48	4.39e-46
INHBE	4	-1.3898	-14.522	0.024002	0.71688	8.73e-48	4.78e-46
HSPB8	4	-1.2643	-14.509	0.035051	0.76318	1.06e-47	5.8e-46
POTEA	4	-1.4118	-14.498	0.022558	0.71674	1.24e-47	6.75e-46
RHEB	4	1.1191	14.497	0.001423	0.56	1.27e-47	6.87e-46
HSPE1	4	-1.3719	-14.481	0.025205	0.72168	1.59e-47	8.63e-46
GLG1	4	-1.4693	-14.474	0.019513	0.70377	1.78e-47	9.6e-46
PCNA	4	-1.4993	-14.472	0.017693	0.7025	1.83e-47	9.84e-46
BMPR1B	4	-1.2163	-14.457	0.040596	0.78862	2.26e-47	1.21e-45
NKX6-3	4	-1.3006	-14.457	0.031577	0.75925	2.27e-47	1.21e-45
KLHDC3	4	-1.4072	-14.446	0.022872	0.71674	2.65e-47	1.41e-45
KRT78	4	-1.3555	-14.446	0.026618	0.72894	2.66e-47	1.41e-45
YAF2	4	-1.1924	-14.446	0.0434	0.79368	2.66e-47	1.41e-45
LOC100507462	4	-1.3427	-14.438	0.027696	0.7363	2.99e-47	1.58e-45
ALX1	4	-1.432	-14.398	0.021386	0.71469	5.3e-47	2.8e-45
PPP6R3	4	-1.4957	-14.372	0.017902	0.7025	7.79e-47	4.1e-45
TMIGD1	4	-1.4043	-14.368	0.023102	0.71674	8.2e-47	4.31e-45
H3F3A	4	-1.4789	-14.339	0.018907	0.7025	1.25e-46	6.56e-45
TCEB2	4	-4.6555	-14.329	0.00031389	0.375	1.45e-46	7.56e-45
ZNF566	4	-1.6454	-14.327	0.011687	0.66291	1.47e-46	7.68e-45
RPL35	4	-1.3561	-14.319	0.026513	0.72712	1.67e-46	8.67e-45
UBC	4	-1.255	-14.313	0.036035	0.76993	1.81e-46	9.37e-45
SIRT2	4	-1.3699	-14.304	0.025446	0.72168	2.05e-46	1.06e-44
NSL1	4	-1.3116	-14.301	0.030573	0.75538	2.17e-46	1.12e-44
OFD1	4	-1.4733	-14.294	0.01921	0.70321	2.38e-46	1.22e-44
CASK	4	-1.213	-14.291	0.041036	0.79177	2.5e-46	1.28e-44
OCA2	4	1.053	14.27	0.0026681	0.5977	3.36e-46	1.72e-44
CARD10	4	-1.2584	-14.256	0.035626	0.76693	4.13e-46	2.1e-44
YTHDC1	4	-1.3109	-14.25	0.030646	0.75538	4.46e-46	2.27e-44
FBXW5	4	-1.363	-14.239	0.026001	0.72168	5.24e-46	2.66e-44
DNAI2	4	-1.7551	-14.236	0.008611	0.65059	5.46e-46	2.76e-44
GFER	4	-1.306	-14.226	0.031075	0.7562	6.28e-46	3.17e-44
NCAPD3	4	-1.2039	-14.209	0.042103	0.79209	8e-46	4.03e-44
MASP1	4	-1.4021	-14.204	0.023186	0.71674	8.68e-46	4.36e-44
ADGRA2	4	-1.4059	-14.19	0.022977	0.71674	1.06e-45	5.31e-44
B4GAT1	4	-1.286	-14.188	0.032906	0.75981	1.09e-45	5.43e-44
PREB	4	-1.1793	-14.186	0.045252	0.79368	1.12e-45	5.59e-44
PAIP2B	4	-1.3786	-14.18	0.024745	0.72104	1.21e-45	6.01e-44
GLRX2	4	-1.5634	-14.18	0.014491	0.68395	1.21e-45	6.01e-44
SPHK2	4	-1.1696	-14.178	0.04656	0.79678	1.25e-45	6.17e-44
ZNF280D	4	-1.3387	-14.176	0.028051	0.73959	1.29e-45	6.34e-44
CTF1	4	-1.2362	-14.175	0.038326	0.78008	1.3e-45	6.41e-44
OTX2	4	-1.2606	-14.153	0.035386	0.76602	1.79e-45	8.77e-44
PSG5	4	-1.528	-14.151	0.016197	0.69644	1.85e-45	9.04e-44
SRCAP	4	1.0779	14.136	0.0021554	0.58933	2.27e-45	1.11e-43
METAP1	4	-1.3831	-14.124	0.024421	0.72074	2.72e-45	1.32e-43
CCDC186	4	-1.2589	-14.097	0.035564	0.76693	3.99e-45	1.93e-43
FABP6	4	-1.5602	-14.09	0.014669	0.68537	4.39e-45	2.12e-43
DDX11	4	-1.4927	-14.086	0.01807	0.7025	4.6e-45	2.22e-43
U2AF1	4	-1.3138	-14.082	0.030311	0.75538	4.9e-45	2.36e-43
C1QTNF7	4	-1.3984	-14.074	0.023489	0.71674	5.48e-45	2.63e-43
TIGD3	4	-1.2907	-14.073	0.032446	0.75981	5.6e-45	2.69e-43
CFLAR	4	-1.6094	-14.071	0.012838	0.67713	5.75e-45	2.75e-43
PTPN23	4	-1.1557	-14.07	0.048904	0.80341	5.82e-45	2.78e-43
TMEM41B	4	-1.1383	-14.069	0.051771	0.80694	5.87e-45	2.79e-43
KCNJ15	4	-1.3924	-14.065	0.023856	0.71674	6.25e-45	2.96e-43
TBC1D3C	4	-1.2777	-14.065	0.033607	0.75981	6.27e-45	2.97e-43
OSBPL5	4	-1.2771	-14.064	0.033628	0.75981	6.34e-45	2.99e-43
FBXL15	4	-1.5432	-14.06	0.015485	0.69333	6.66e-45	3.14e-43
MED13	4	-1.4555	-14.058	0.020194	0.70567	6.85e-45	3.22e-43
PLA2G12B	4	-1.254	-14.053	0.036171	0.76993	7.4e-45	3.47e-43
F8A3	4	-1.2583	-14.047	0.035626	0.76693	8.04e-45	3.76e-43
RPS17	4	-1.2843	-14.044	0.033074	0.75981	8.39e-45	3.91e-43
CRYGC	4	-1.2725	-14.038	0.034109	0.76079	9.13e-45	4.25e-43
METTL24	4	-1.2587	-14.037	0.035585	0.76693	9.26e-45	4.3e-43
PRKD1	4	-1.1201	-14.014	0.054533	0.80902	1.27e-44	5.9e-43
RPS27A	4	-1.2838	-14.013	0.033084	0.75981	1.3e-44	6e-43
ZNF572	4	1.1101	14.012	0.0014753	0.56	1.33e-44	6.1e-43
IL36A	4	-1.3801	-14.009	0.024651	0.7208	1.37e-44	6.28e-43
POMGNT1	4	-1.3134	-14.003	0.030343	0.75538	1.49e-44	6.84e-43
CDCA3	4	-1.2977	-13.996	0.031818	0.75981	1.65e-44	7.55e-43
PFDN6	4	-1.4438	-13.986	0.020821	0.70941	1.91e-44	8.72e-43
RIMBP2	4	-1.2338	-13.983	0.038525	0.78008	1.99e-44	9.04e-43
PRND	4	1.113	13.973	0.0014648	0.56	2.27e-44	1.03e-42
NUBPL	4	-1.2881	-13.968	0.032718	0.75981	2.45e-44	1.11e-42
EIF2S1	4	-1.2008	-13.96	0.042501	0.79209	2.72e-44	1.23e-42
CDYL	4	-1.2048	-13.96	0.041936	0.79209	2.72e-44	1.23e-42
OR51E2	4	-1.4171	-13.955	0.022307	0.71674	2.92e-44	1.31e-42
PRH1	4	-1.179	-13.944	0.045273	0.79368	3.41e-44	1.53e-42
VDR	4	-1.3399	-13.936	0.027988	0.73895	3.81e-44	1.71e-42
PSMB4	4	-1.0744	-13.931	0.062391	0.81407	4.09e-44	1.83e-42
HIST2H2AC	4	-1.2398	-13.925	0.037855	0.77723	4.44e-44	1.98e-42
TEX35	4	-1.3421	-13.925	0.027737	0.73639	4.45e-44	1.98e-42
TBC1D3L	4	-1.4594	-13.923	0.020037	0.70567	4.59e-44	2.03e-42
GBP2	4	-1.3647	-13.923	0.025823	0.72168	4.62e-44	2.05e-42
MAD1L1	4	-1.3643	-13.911	0.025865	0.72168	5.45e-44	2.41e-42
MTUS1	4	-1.1895	-13.903	0.04385	0.79368	6.06e-44	2.67e-42
ETV3	4	1.0694	13.895	0.0023019	0.58933	6.77e-44	2.98e-42
DGCR8	4	-1.2508	-13.893	0.036537	0.77065	7.02e-44	3.08e-42
RFC1	4	-1.4246	-13.886	0.021805	0.71674	7.67e-44	3.36e-42
RBBP6	4	-1.3903	-13.882	0.02396	0.71674	8.18e-44	3.57e-42
ZNF644	4	-1.4311	-13.874	0.021439	0.71518	9.04e-44	3.94e-42
DIRAS2	4	-1.8389	-13.873	0.0068428	0.64202	9.22e-44	4.01e-42
KDM4C	4	1.0706	13.862	0.0022705	0.58933	1.08e-43	4.67e-42
LEO1	4	-1.3023	-13.861	0.031462	0.75768	1.09e-43	4.71e-42
IFITM3	4	-1.1211	-13.86	0.054428	0.80902	1.1e-43	4.75e-42
HDAC7	4	-1.2119	-13.855	0.04114	0.79177	1.19e-43	5.14e-42
PPP4R4	4	1.0732	13.85	0.0022391	0.58933	1.27e-43	5.46e-42
HNRNPU	4	-1.4744	-13.843	0.019137	0.70321	1.4e-43	6e-42
RAET1L	4	-1.145	-13.832	0.050672	0.80694	1.64e-43	7.01e-42
KRTAP10-12	4	-1.2188	-13.831	0.040293	0.78512	1.66e-43	7.07e-42
CDC27	4	-1.4203	-13.83	0.022035	0.71674	1.69e-43	7.2e-42
EPHA5	4	-1.2635	-13.815	0.035135	0.76318	2.06e-43	8.76e-42
MTOR	4	1.0774	13.807	0.0021658	0.58933	2.3e-43	9.76e-42
TTC3	4	-1.7566	-13.805	0.0086006	0.65059	2.38e-43	1.01e-41
TOPBP1	4	-1.3416	-13.8	0.0278	0.73703	2.54e-43	1.07e-41
VWC2L	4	-1.6234	-13.796	0.012451	0.6691	2.7e-43	1.13e-41
SYF2	4	-1.7047	-13.796	0.0099084	0.65201	2.7e-43	1.13e-41
RNF11	4	-1.1819	-13.785	0.044823	0.79368	3.14e-43	1.32e-41
SLU7	4	-1.3168	-13.782	0.030081	0.75538	3.27e-43	1.37e-41
TFCP2	4	-1.267	-13.78	0.034789	0.76318	3.38e-43	1.41e-41
CNGA4	4	-1.4603	-13.779	0.019984	0.70567	3.41e-43	1.42e-41
ELL	4	-1.1734	-13.77	0.046006	0.79368	3.87e-43	1.61e-41
KAT8	4	-1.3469	-13.763	0.027382	0.73203	4.27e-43	1.77e-41
HIST1H4L	4	1.0101	13.743	0.0038608	0.61455	5.63e-43	2.33e-41
PC	4	-1.2399	-13.709	0.037855	0.77723	8.94e-43	3.69e-41
PSMG2	4	-1.4821	-13.705	0.018676	0.7025	9.49e-43	3.91e-41
REM1	4	-1.1609	-13.702	0.048036	0.8	9.82e-43	4.04e-41
KNOP1	4	-1.1888	-13.699	0.043934	0.79368	1.02e-42	4.2e-41
GPR21	4	-1.2061	-13.697	0.041779	0.79209	1.06e-42	4.34e-41
ZNF347	4	-1.3273	-13.691	0.029056	0.7455	1.16e-42	4.72e-41
RBP3	4	-1.1806	-13.689	0.045001	0.79368	1.18e-42	4.79e-41
SNX22	4	-1.2143	-13.688	0.040858	0.79169	1.2e-42	4.87e-41
AHCTF1	4	-1.1899	-13.679	0.043756	0.79368	1.35e-42	5.48e-41
LAMTOR5	4	-1.391	-13.666	0.023929	0.71674	1.61e-42	6.54e-41
GTSE1	4	-1.3719	-13.652	0.025205	0.72168	1.97e-42	7.97e-41
KRT18	4	-1.3128	-13.65	0.030426	0.75538	2.01e-42	8.11e-41
RAB3B	4	-1.2347	-13.65	0.038462	0.78008	2.01e-42	8.11e-41
FAM60A	4	-1.2428	-13.649	0.037489	0.77638	2.04e-42	8.2e-41
KIFAP3	4	-1.1947	-13.649	0.043212	0.7931	2.05e-42	8.2e-41
TM9SF1	4	-1.126	-13.647	0.053863	0.80902	2.1e-42	8.39e-41
PFN1	4	-1.3047	-13.638	0.03118	0.7562	2.37e-42	9.46e-41
MPV17L2	4	1.0251	13.632	0.0033063	0.6	2.58e-42	1.03e-40
DHCR24	4	1.0194	13.623	0.0034946	0.61284	2.94e-42	1.17e-40
PEX11B	4	-1.4972	-13.619	0.017829	0.7025	3.1e-42	1.23e-40
MAS1L	4	-1.133	-13.616	0.052556	0.80804	3.22e-42	1.27e-40
ZNF624	4	1.1066	13.596	0.0015381	0.56	4.25e-42	1.68e-40
PRDX5	4	-1.2353	-13.592	0.03841	0.78008	4.45e-42	1.75e-40
DET1	4	-1.1637	-13.589	0.047607	0.79895	4.62e-42	1.82e-40
SPG21	4	-1.5066	-13.588	0.017327	0.70232	4.69e-42	1.84e-40
COL6A1	4	-1.3668	-13.585	0.025624	0.72168	4.93e-42	1.93e-40
NUP93	4	-1.3876	-13.583	0.02418	0.72062	5.03e-42	1.97e-40
ACTR1A	4	-1.1769	-13.576	0.045504	0.79368	5.58e-42	2.18e-40
CCDC112	4	-1.5331	-13.567	0.015956	0.69644	6.27e-42	2.44e-40
SPSB2	4	-1.166	-13.567	0.047209	0.79877	6.3e-42	2.45e-40
OR5M8	4	-1.3456	-13.566	0.027486	0.73203	6.35e-42	2.46e-40
IL17REL	4	-1.2058	-13.566	0.04181	0.79209	6.39e-42	2.47e-40
NKRF	4	-1.2915	-13.564	0.032393	0.75981	6.52e-42	2.52e-40
ITSN2	4	-1.2914	-13.563	0.032414	0.75981	6.65e-42	2.56e-40
RNF103	4	-1.1792	-13.562	0.045252	0.79368	6.75e-42	2.6e-40
STARD4	4	-1.4486	-13.516	0.02057	0.70847	1.26e-41	4.83e-40
LGALS4	4	-1.1657	-13.51	0.047251	0.79877	1.37e-41	5.24e-40
CCDC184	4	-1.3278	-13.51	0.029003	0.74516	1.37e-41	5.24e-40
ZDHHC17	4	-1.3666	-13.507	0.025645	0.72168	1.43e-41	5.46e-40
DUSP27	4	-1.143	-13.501	0.050955	0.80694	1.54e-41	5.87e-40
MORN3	4	-1.2651	-13.501	0.035009	0.76318	1.55e-41	5.88e-40
PEX1	4	-1.451	-13.5	0.020424	0.70758	1.57e-41	5.94e-40
NOP58	4	-1.3357	-13.486	0.028323	0.74073	1.88e-41	7.11e-40
HAUS3	4	-4.195	-13.481	0.00055454	0.40769	2.03e-41	7.65e-40
EFCAB12	4	-4.8638	-13.475	0.0001988	0.33333	2.18e-41	8.22e-40
SMARCAL1	4	-1.2294	-13.462	0.039069	0.78138	2.61e-41	9.82e-40
BARHL2	4	1.0693	13.448	0.0023019	0.58933	3.17e-41	1.19e-39
NPY1R	4	-1.3177	-13.445	0.030018	0.755	3.28e-41	1.23e-39
SNW1	4	-1.1073	-13.445	0.056563	0.8093	3.29e-41	1.23e-39
ELAVL2	4	-1.348	-13.442	0.027298	0.73203	3.43e-41	1.28e-39
ALKBH3	4	-1.3674	-13.441	0.025603	0.72168	3.5e-41	1.3e-39
OTUB1	4	-1.1167	-13.438	0.054952	0.80902	3.63e-41	1.35e-39
LOC100144595	4	-1.1825	-13.436	0.044698	0.79368	3.72e-41	1.38e-39
HIST1H4C	4	-1.3516	-13.436	0.026984	0.73203	3.74e-41	1.39e-39
POU3F4	4	-1.0458	-13.433	0.068271	0.82127	3.87e-41	1.43e-39
PAK1IP1	4	-1.4222	-13.418	0.021951	0.71674	4.77e-41	1.76e-39
TMED2	4	-1.1377	-13.413	0.051907	0.80694	5.07e-41	1.87e-39
ROS1	4	-1.224	-13.412	0.039623	0.78197	5.16e-41	1.9e-39
AGMO	4	1.0632	13.407	0.0024379	0.5977	5.51e-41	2.02e-39
ABHD8	4	1.0161	13.402	0.0036097	0.61455	5.91e-41	2.16e-39
C8orf22	4	-1.2675	-13.39	0.034748	0.76318	6.94e-41	2.54e-39
PCYOX1	4	-1.3679	-13.386	0.025572	0.72168	7.28e-41	2.66e-39
KNTC1	4	-1.2348	-13.385	0.038462	0.78008	7.36e-41	2.68e-39
MYOC	4	-1.2854	-13.384	0.032979	0.75981	7.46e-41	2.71e-39
ZBTB18	4	1.0562	13.379	0.0025948	0.5977	7.97e-41	2.89e-39
KRTCAP3	4	-1.2189	-13.379	0.040251	0.7851	8.01e-41	2.9e-39
HTATSF1	4	-1.2884	-13.367	0.032676	0.75981	9.48e-41	3.43e-39
TAF9	4	-1.2789	-13.362	0.033523	0.75981	1.01e-40	3.64e-39
ST18	4	1.0562	13.36	0.0025948	0.5977	1.03e-40	3.72e-39
TRIM6	4	-1.2261	-13.358	0.039519	0.78197	1.07e-40	3.83e-39
DSC2	4	1.0521	13.357	0.0027204	0.5977	1.08e-40	3.86e-39
TERT	4	-1.3862	-13.356	0.024253	0.72062	1.09e-40	3.89e-39
H3F3B	4	-1.1829	-13.351	0.044646	0.79368	1.17e-40	4.18e-39
ANXA8	4	-1.2196	-13.347	0.040115	0.78405	1.24e-40	4.41e-39
UFL1	4	-1.3465	-13.34	0.027413	0.73203	1.35e-40	4.8e-39
CTSC	4	-1.5712	-13.334	0.014219	0.6812	1.48e-40	5.25e-39
STC1	4	1.0276	13.333	0.003254	0.6	1.48e-40	5.25e-39
MPP7	4	-1.1175	-13.33	0.054899	0.80902	1.56e-40	5.51e-39
UBE2H	4	-1.175	-13.329	0.045734	0.79368	1.57e-40	5.56e-39
ARNTL2	4	-1.3105	-13.324	0.030667	0.75538	1.69e-40	5.95e-39
METTL18	4	-1.2353	-13.317	0.03841	0.78008	1.85e-40	6.52e-39
PLAC1	4	-1.1086	-13.316	0.056322	0.80902	1.86e-40	6.53e-39
UBE2E3	4	-1.3497	-13.311	0.027141	0.73203	2e-40	7e-39
POLR2D	4	-1.1635	-13.309	0.04769	0.79895	2.05e-40	7.18e-39
PIGA	4	-1.2967	-13.301	0.031881	0.75981	2.29e-40	8.02e-39
NEUROG2	4	-1.1493	-13.297	0.04994	0.80694	2.42e-40	8.44e-39
TOR2A	4	-1.2284	-13.296	0.039236	0.78197	2.43e-40	8.46e-39
SMCP	4	-1.1121	-13.29	0.055632	0.80902	2.65e-40	9.21e-39
NCAPH2	4	-1.1386	-13.287	0.051719	0.80694	2.76e-40	9.57e-39
RELL1	4	-1.2501	-13.279	0.036631	0.77065	3.07e-40	1.06e-38
NR1D1	4	-1.1271	-13.266	0.053623	0.80902	3.64e-40	1.26e-38
SALL3	4	-1.1955	-13.262	0.043066	0.7923	3.84e-40	1.32e-38
GNB2L1	4	-1.1108	-13.253	0.055872	0.80902	4.32e-40	1.49e-38
GLP1R	4	-1.195	-13.252	0.043128	0.79269	4.41e-40	1.52e-38
RNF181	4	-1.2972	-13.245	0.031849	0.75981	4.83e-40	1.66e-38
C7orf60	4	-1.2648	-13.242	0.03502	0.76318	5.03e-40	1.72e-38
CERS5	4	-1.3407	-13.236	0.027905	0.73878	5.4e-40	1.85e-38
DNAJC6	4	-1.2182	-13.236	0.040345	0.78534	5.43e-40	1.85e-38
OR2M7	4	-1.182	-13.227	0.044792	0.79368	6.11e-40	2.08e-38
PABPN1	4	-1.2337	-13.227	0.038525	0.78008	6.17e-40	2.1e-38
ADM	4	-1.1342	-13.22	0.05242	0.80804	6.71e-40	2.28e-38
SMDT1	4	-1.3623	-13.214	0.026032	0.72168	7.26e-40	2.46e-38
OR4A5	4	-1.1481	-13.204	0.050201	0.80694	8.29e-40	2.81e-38
UFSP1	4	-1.1482	-13.203	0.05017	0.80694	8.47e-40	2.86e-38
CCL23	4	-1.1071	-13.202	0.056573	0.8093	8.57e-40	2.89e-38
RHOG	4	-1.4318	-13.198	0.021386	0.71469	9.01e-40	3.03e-38
POLN	4	1.0836	13.182	0.0020298	0.58933	1.12e-39	3.76e-38
GNPTAB	4	-1.1265	-13.182	0.053759	0.80902	1.12e-39	3.76e-38
BCL2L11	4	1.0161	13.179	0.0036097	0.61455	1.16e-39	3.87e-38
DHDDS	4	-1.1388	-13.171	0.051708	0.80694	1.28e-39	4.28e-38
ATXN7L3	4	-1.1935	-13.17	0.043285	0.7931	1.31e-39	4.38e-38
RAB40AL	4	-1.126	-13.165	0.053853	0.80902	1.39e-39	4.62e-38
ATP6V1B1	4	-1.1146	-13.163	0.05536	0.80902	1.44e-39	4.79e-38
LMAN1L	4	1.0256	13.161	0.0032958	0.6	1.48e-39	4.9e-38
ERMP1	4	-1.1989	-13.161	0.042679	0.79209	1.48e-39	4.91e-38
SIRT4	4	-1.2446	-13.157	0.037217	0.77519	1.56e-39	5.16e-38
NDST4	4	-1.3746	-13.154	0.025038	0.72168	1.6e-39	5.3e-38
ERAL1	4	-1.0992	-13.152	0.057892	0.81009	1.65e-39	5.43e-38
MYH6	4	-1.3492	-13.151	0.027214	0.73203	1.69e-39	5.54e-38
TUSC2	4	1.01	13.134	0.0038608	0.61455	2.09e-39	6.87e-38
TASP1	4	-1.3035	-13.129	0.031316	0.75676	2.25e-39	7.37e-38
DBX2	4	-1.1779	-13.129	0.045368	0.79368	2.26e-39	7.39e-38
BCL10	4	1.1077	13.123	0.0014962	0.56	2.45e-39	7.99e-38
CCDC63	4	-1.4584	-13.114	0.020089	0.70567	2.74e-39	8.93e-38
CNOT8	4	-1.3094	-13.065	0.030782	0.75538	5.23e-39	1.7e-37
COX6A2	4	-1.1986	-13.062	0.04272	0.79209	5.4e-39	1.76e-37
NUPR1L	4	-1.3511	-13.062	0.027036	0.73203	5.43e-39	1.76e-37
MRPS18C	4	-1.2062	-13.049	0.041779	0.79209	6.43e-39	2.08e-37
PHC1	4	-1.3324	-13.047	0.028637	0.74073	6.65e-39	2.15e-37
B4GALT2	4	-1.0861	-13.034	0.060277	0.81407	7.86e-39	2.54e-37
ICK	4	-1.2825	-13.028	0.03322	0.75981	8.48e-39	2.73e-37
MICAL2	4	-1.3691	-13.02	0.025498	0.72168	9.44e-39	3.04e-37
H2AFB3	4	-1.2102	-13.018	0.041339	0.79178	9.71e-39	3.12e-37
ARCN1	4	-1.1358	-13.013	0.0522	0.80694	1.03e-38	3.29e-37
MAGEA11	4	-1.0911	-13.012	0.059388	0.81407	1.04e-38	3.33e-37
ADGRF4	4	-1.5713	-13.012	0.014219	0.6812	1.04e-38	3.33e-37
GALP	4	-1.2734	-13.005	0.034036	0.76079	1.15e-38	3.66e-37
RPS10	4	-1.0846	-13.004	0.060643	0.81407	1.16e-38	3.7e-37
RIT2	4	-1.2213	-13	0.039927	0.78197	1.23e-38	3.9e-37
ANKUB1	4	-1.0933	-12.993	0.05898	0.81407	1.34e-38	4.25e-37
ST20	4	-1.0346	-12.985	0.070604	0.82488	1.5e-38	4.74e-37
PLGRKT	4	0.99219	12.984	0.0045828	0.61455	1.5e-38	4.74e-37
DNAJC15	4	-1.1787	-12.979	0.045294	0.79368	1.61e-38	5.08e-37
IGHMBP2	4	-1.1478	-12.979	0.050243	0.80694	1.61e-38	5.08e-37
CCDC155	4	-1.1895	-12.975	0.04385	0.79368	1.69e-38	5.31e-37
RBM20	4	-1.4102	-12.97	0.022642	0.71674	1.8e-38	5.66e-37
SRSF1	4	-1.1091	-12.968	0.056207	0.80902	1.86e-38	5.83e-37
ARSE	4	-1.2347	-12.965	0.038462	0.78008	1.94e-38	6.09e-37
HRH4	4	-4.6836	-12.962	0.00030343	0.375	2e-38	6.27e-37
ZBTB8OS	4	-1.1096	-12.952	0.056092	0.80902	2.28e-38	7.13e-37
PSMD14	4	-1.188	-12.95	0.04406	0.79368	2.34e-38	7.3e-37
SMYD2	4	-1.1824	-12.942	0.04474	0.79368	2.59e-38	8.08e-37
DGUOK	4	-1.1818	-12.939	0.044823	0.79368	2.72e-38	8.45e-37
STOML2	4	0.99581	12.938	0.0044363	0.61455	2.75e-38	8.54e-37
RBM41	4	-1.1199	-12.938	0.054564	0.80902	2.76e-38	8.54e-37
PLEKHG1	4	-1.1385	-12.932	0.051739	0.80694	2.95e-38	9.13e-37
H2AFY2	4	-1.2014	-12.932	0.042427	0.79209	2.97e-38	9.18e-37
FCER1G	4	-1.2812	-12.927	0.033366	0.75981	3.16e-38	9.75e-37
SEC22C	4	-1.0106	-12.921	0.076191	0.83113	3.44e-38	1.06e-36
KRTAP8-1	4	-1.2638	-12.918	0.035082	0.76318	3.57e-38	1.1e-36
SLC47A1	4	-1.213	-12.908	0.041036	0.79177	4.04e-38	1.24e-36
ATP8B2	4	-1.2218	-12.906	0.039843	0.78197	4.15e-38	1.27e-36
KIAA0930	4	-1.0917	-12.905	0.059262	0.81407	4.23e-38	1.29e-36
ATP6V1A	4	-1.1187	-12.899	0.0547	0.80902	4.56e-38	1.39e-36
SRSF12	4	-1.3583	-12.89	0.026367	0.72414	5.12e-38	1.56e-36
C12orf79	4	-1.2771	-12.886	0.033628	0.75981	5.41e-38	1.65e-36
RAPGEFL1	4	-1.1737	-12.883	0.045964	0.79368	5.61e-38	1.71e-36
PTGFRN	4	-1.1797	-12.881	0.045116	0.79368	5.73e-38	1.74e-36
TCHH	4	-1.1368	-12.879	0.052106	0.80694	5.89e-38	1.78e-36
LRRC8C	4	-1.1841	-12.876	0.044541	0.79368	6.11e-38	1.85e-36
TRNT1	4	-1.5638	-12.875	0.01446	0.68395	6.19e-38	1.87e-36
PSAPL1	4	-1.0822	-12.871	0.061083	0.81407	6.59e-38	1.99e-36
EIF5	4	-1.182	-12.868	0.044803	0.79368	6.77e-38	2.04e-36
TMEM120B	4	-1.0686	-12.865	0.063406	0.81407	7.09e-38	2.13e-36
RAB9B	4	-1.6793	-12.851	0.010589	0.65201	8.49e-38	2.55e-36
CD109	4	-1.2002	-12.844	0.042553	0.79209	9.28e-38	2.78e-36
ASS1	4	-1.0687	-12.838	0.063385	0.81407	1e-37	3e-36
UTS2B	4	-1.318	-12.837	0.029997	0.755	1.02e-37	3.05e-36
FAM170B	4	-1.0528	-12.834	0.066911	0.81677	1.05e-37	3.14e-36
CSRNP2	4	-1.4722	-12.831	0.019315	0.70321	1.1e-37	3.27e-36
ZNF615	4	-1.4248	-12.828	0.021794	0.71674	1.14e-37	3.39e-36
HIST1H3J	4	-1.0304	-12.823	0.071609	0.82789	1.23e-37	3.64e-36
POLG	4	-1.0987	-12.821	0.057975	0.81009	1.26e-37	3.73e-36
NAA50	4	-1.2073	-12.82	0.041622	0.79209	1.26e-37	3.73e-36
YKT6	4	-1.0649	-12.82	0.064253	0.81407	1.27e-37	3.76e-36
ZNF548	4	1.0272	12.812	0.003254	0.6	1.4e-37	4.14e-36
ANGPTL6	4	0.99714	12.811	0.0043945	0.61455	1.42e-37	4.18e-36
SPATA5	4	-1.0939	-12.811	0.058833	0.81407	1.42e-37	4.18e-36
SULT1A3	4	-1.3902	-12.807	0.02396	0.71674	1.49e-37	4.39e-36
PRSS53	4	-1.1565	-12.802	0.048841	0.80341	1.6e-37	4.7e-36
CNTNAP3B	4	0.99484	12.796	0.0044782	0.61455	1.73e-37	5.06e-36
RTP5	4	-1.1173	-12.779	0.054931	0.80902	2.16e-37	6.3e-36
ANKDD1B	4	-1.174	-12.776	0.045912	0.79368	2.22e-37	6.48e-36
DEFA1B	4	-1.07	-12.771	0.063186	0.81407	2.38e-37	6.93e-36
WDR87	4	0.98874	12.763	0.0047083	0.61455	2.64e-37	7.69e-36
FGF8	4	-1.0725	-12.761	0.062705	0.81407	2.71e-37	7.87e-36
KERA	4	0.95455	12.752	0.0060999	0.63046	3.02e-37	8.76e-36
THAP11	4	0.97171	12.751	0.0053047	0.61455	3.08e-37	8.91e-36
RP1	4	-1.1592	-12.74	0.048391	0.80156	3.55e-37	1.03e-35
ZC3H14	4	-1.2157	-12.739	0.040649	0.78883	3.6e-37	1.04e-35
ALDOA	4	-0.97422	-12.731	0.085169	0.84495	3.97e-37	1.14e-35
HMX1	4	-4.3426	-12.714	0.00052315	0.40769	4.94e-37	1.42e-35
CFAP61	4	-1.4723	-12.711	0.019304	0.70321	5.12e-37	1.47e-35
POU2AF1	4	-1.1967	-12.711	0.042951	0.79209	5.13e-37	1.47e-35
RNF5	4	-1.1295	-12.711	0.053215	0.80902	5.17e-37	1.48e-35
C7orf55-LUC7L2	4	-1.1057	-12.71	0.056835	0.8093	5.22e-37	1.49e-35
GABRR2	4	-1.1549	-12.708	0.049019	0.80341	5.37e-37	1.53e-35
SLC5A5	4	0.96644	12.707	0.0055558	0.62197	5.37e-37	1.53e-35
GTF2H3	4	-1.0946	-12.702	0.058729	0.81407	5.78e-37	1.65e-35
TGFBI	4	-1.0187	-12.7	0.074319	0.82789	5.94e-37	1.69e-35
PTPRG	4	0.99167	12.686	0.0046142	0.61455	7.05e-37	2e-35
COL8A2	4	-1.1068	-12.685	0.056626	0.8093	7.17e-37	2.03e-35
CHKA	4	-1.1182	-12.684	0.054732	0.80902	7.23e-37	2.05e-35
KITLG	4	-1.3183	-12.682	0.029956	0.755	7.42e-37	2.1e-35
JPH4	4	-1.024	-12.681	0.07322	0.82789	7.58e-37	2.14e-35
ACSF2	4	-1.0605	-12.678	0.065237	0.81476	7.8e-37	2.2e-35
POLR2A	4	-1.2437	-12.673	0.037363	0.7763	8.37e-37	2.36e-35
CRISP1	4	-1.2137	-12.67	0.040921	0.7917	8.69e-37	2.44e-35
SRC	4	-1.2271	-12.665	0.039393	0.78197	9.28e-37	2.6e-35
STRADB	4	-1.0983	-12.656	0.058038	0.81037	1.04e-36	2.9e-35
PDAP1	4	-1.1327	-12.651	0.052587	0.80804	1.11e-36	3.09e-35
RUNX1T1	4	-1.1172	-12.649	0.054952	0.80902	1.13e-36	3.15e-35
FAM196B	4	-1.1511	-12.649	0.049553	0.80476	1.13e-36	3.15e-35
AK2	4	-1.0026	-12.648	0.077981	0.83192	1.15e-36	3.21e-35
ADORA1	4	0.95369	12.642	0.0061418	0.63046	1.24e-36	3.44e-35
43529	4	-1.0467	-12.642	0.068135	0.82079	1.24e-36	3.45e-35
CSK	4	0.96522	12.641	0.0055977	0.62197	1.26e-36	3.49e-35
C3orf84	4	0.98338	12.64	0.0048234	0.61455	1.27e-36	3.52e-35
C19orf38	4	0.96587	12.634	0.0055977	0.62197	1.37e-36	3.79e-35
RRS1	4	0.99545	12.631	0.0044572	0.61455	1.42e-36	3.91e-35
FAM98B	4	-1.4381	-12.618	0.021125	0.71252	1.68e-36	4.64e-35
ENOPH1	4	-1.1617	-12.617	0.047868	0.8	1.7e-36	4.68e-35
HN1	4	-1.1023	-12.605	0.057327	0.8093	1.99e-36	5.48e-35
SHISA5	4	0.92677	12.604	0.0075334	0.64202	1.99e-36	5.48e-35
AKR1C3	4	0.97808	12.602	0.0050745	0.61455	2.06e-36	5.65e-35
NAPB	4	-1.0733	-12.599	0.06259	0.81407	2.14e-36	5.85e-35
YY2	4	-1.0313	-12.596	0.071274	0.8262	2.23e-36	6.11e-35
C4A	4	-1.2232	-12.592	0.039697	0.78197	2.34e-36	6.39e-35
LYRM9	4	-1.029	-12.586	0.071923	0.82789	2.53e-36	6.89e-35
PHGR1	4	-1.0431	-12.582	0.068815	0.82291	2.66e-36	7.24e-35
CCDC168	4	-1.6896	-12.574	0.010306	0.65201	2.95e-36	8.03e-35
ARG2	4	-1.1826	-12.562	0.044698	0.79368	3.4e-36	9.24e-35
CIRH1A	4	-1.1357	-12.561	0.05221	0.80694	3.45e-36	9.36e-35
DRAM1	4	-1.1383	-12.557	0.051792	0.80694	3.65e-36	9.9e-35
CAMK1D	4	-1.3529	-12.544	0.026858	0.73203	4.31e-36	1.16e-34
KDELC1	4	-1.1356	-12.541	0.052231	0.80694	4.44e-36	1.2e-34
PRAMEF10	4	0.945	12.541	0.0065812	0.63535	4.48e-36	1.21e-34
ARNT	4	1.0224	12.54	0.0034005	0.60185	4.5e-36	1.21e-34
LOC389895	4	-1.0411	-12.54	0.069255	0.82291	4.52e-36	1.21e-34
OR2M5	4	1.0519	12.54	0.0027204	0.5977	4.52e-36	1.21e-34
PCDHB5	4	-1.3348	-12.527	0.028417	0.74073	5.33e-36	1.43e-34
PHACTR1	4	1.2041	12.521	0.00066963	0.42667	5.75e-36	1.54e-34
KDM5C	4	-1.2066	-12.521	0.041747	0.79209	5.76e-36	1.54e-34
CHD2	4	0.99344	12.517	0.0045514	0.61455	6.01e-36	1.6e-34
TMEM38A	4	0.91867	12.517	0.0079519	0.64202	6.03e-36	1.61e-34
PTTG1IP	4	-1.1576	-12.517	0.048653	0.80341	6.05e-36	1.61e-34
TCTEX1D4	4	0.99465	12.516	0.0044886	0.61455	6.13e-36	1.63e-34
BCLAF1	4	-1.4576	-12.509	0.02012	0.70567	6.71e-36	1.78e-34
PALMD	4	0.95875	12.506	0.0059325	0.63046	6.9e-36	1.83e-34
PITPNM1	4	-1.166	-12.505	0.047219	0.79877	7.04e-36	1.86e-34
MACF1	4	-1.264	-12.504	0.035072	0.76318	7.08e-36	1.87e-34
USP18	4	0.93949	12.501	0.0068533	0.64202	7.38e-36	1.95e-34
VCP	4	-1.0432	-12.499	0.068815	0.82291	7.57e-36	2e-34
EPGN	4	-1.0715	-12.497	0.062893	0.81407	7.72e-36	2.03e-34
DYRK2	4	-1.2564	-12.496	0.035867	0.76775	7.85e-36	2.06e-34
FXYD3	4	-1.1024	-12.492	0.057295	0.8093	8.22e-36	2.16e-34
NLK	4	-1.0171	-12.49	0.074737	0.82824	8.46e-36	2.22e-34
LETMD1	4	-1.3254	-12.484	0.029265	0.74886	9.16e-36	2.4e-34
IFI30	4	1.0015	12.48	0.004248	0.61455	9.61e-36	2.51e-34
NUPL2	4	-1.3089	-12.477	0.030813	0.75538	9.98e-36	2.61e-34
APC	4	-1.1443	-12.473	0.050766	0.80694	1.05e-35	2.73e-34
WASH1	4	-1.161	-12.47	0.047994	0.8	1.08e-35	2.82e-34
RPL10A	4	-1.2955	-12.462	0.032027	0.75981	1.2e-35	3.12e-34
PRLR	4	-1.1201	-12.46	0.054533	0.80902	1.23e-35	3.19e-34
DAZL	4	0.98901	12.454	0.0047083	0.61455	1.33e-35	3.44e-34
PRKG1	4	1.0015	12.444	0.0042375	0.61455	1.51e-35	3.92e-34
CDPF1	4	-1.0596	-12.443	0.065394	0.81539	1.52e-35	3.93e-34
BRE	4	0.9962	12.44	0.0044363	0.61455	1.58e-35	4.09e-34
TRIM64C	4	-1.0294	-12.436	0.071849	0.82789	1.66e-35	4.28e-34
C2orf68	4	-1.0875	-12.434	0.060058	0.81407	1.7e-35	4.38e-34
GORASP2	4	-1.0663	-12.428	0.063918	0.81407	1.84e-35	4.74e-34
KLF6	4	-1.1167	-12.425	0.054952	0.80902	1.91e-35	4.9e-34
YTHDC2	4	-1.144	-12.423	0.050819	0.80694	1.97e-35	5.05e-34
ATAD1	4	-1.3976	-12.423	0.023521	0.71674	1.97e-35	5.05e-34
HTR2A	4	-1.0788	-12.422	0.061585	0.81407	1.98e-35	5.06e-34
COG7	4	-1.1495	-12.418	0.049908	0.80694	2.09e-35	5.34e-34
FAM47B	4	-1.0398	-12.417	0.069527	0.82291	2.11e-35	5.39e-34
PDE6D	4	-1.1351	-12.417	0.052294	0.80694	2.13e-35	5.42e-34
RNF145	4	-1.1194	-12.416	0.054617	0.80902	2.14e-35	5.44e-34
AQP9	4	-1.0696	-12.41	0.063259	0.81407	2.32e-35	5.9e-34
CMC4	4	-1.1088	-12.405	0.056312	0.80902	2.45e-35	6.21e-34
ORMDL3	4	-1.0802	-12.399	0.061355	0.81407	2.64e-35	6.68e-34
ZHX3	4	-1.0488	-12.399	0.067737	0.81846	2.65e-35	6.7e-34
BCS1L	4	-1.2016	-12.395	0.042406	0.79209	2.77e-35	6.99e-34
ASXL3	4	0.97868	12.395	0.0050641	0.61455	2.78e-35	7.01e-34
RNASEH1	4	0.97849	12.395	0.0050641	0.61455	2.79e-35	7.04e-34
TCEAL2	4	-1.1099	-12.394	0.056061	0.80902	2.81e-35	7.08e-34
DENR	4	-1.2106	-12.389	0.041256	0.79177	3e-35	7.54e-34
CBWD1	4	-1.5667	-12.385	0.014366	0.68308	3.13e-35	7.87e-34
BLVRB	4	-1.1822	-12.382	0.04475	0.79368	3.27e-35	8.19e-34
ACTR6	4	0.9982	12.38	0.004384	0.61455	3.37e-35	8.45e-34
SOX4	4	-1.2125	-12.375	0.041109	0.79177	3.55e-35	8.89e-34
DTX3L	4	-1.0916	-12.374	0.059262	0.81407	3.62e-35	9.04e-34
IL1A	4	-1.0625	-12.373	0.064735	0.81407	3.64e-35	9.09e-34
TMEM106B	4	-1.2243	-12.368	0.039613	0.78197	3.91e-35	9.75e-34
CHURC1-FNTB	4	-1.1372	-12.357	0.052012	0.80694	4.44e-35	1.11e-33
EPOR	4	0.96984	12.356	0.005378	0.61677	4.55e-35	1.13e-33
CEPT1	4	0.93386	12.355	0.0071776	0.64202	4.57e-35	1.13e-33
TTPAL	4	-1.1905	-12.355	0.043704	0.79368	4.59e-35	1.14e-33
CAPN14	4	1.0649	12.352	0.0024065	0.5977	4.74e-35	1.17e-33
CCNL1	4	-1.1436	-12.347	0.050892	0.80694	5.06e-35	1.25e-33
CRYL1	4	-1.1175	-12.341	0.054889	0.80902	5.42e-35	1.34e-33
MRPS27	4	-1.2038	-12.34	0.042124	0.79209	5.54e-35	1.37e-33
PRKCH	4	-1.1037	-12.339	0.057117	0.8093	5.59e-35	1.38e-33
TMEM25	4	-1.1364	-12.334	0.052116	0.80694	5.95e-35	1.46e-33
MMP13	4	-1.1488	-12.334	0.050076	0.80694	5.95e-35	1.46e-33
TRAT1	4	-1.1218	-12.332	0.054334	0.80902	6.1e-35	1.5e-33
ASAP1	4	-1.285	-12.327	0.033	0.75981	6.46e-35	1.58e-33
NFIX	4	-1.2796	-12.321	0.033492	0.75981	6.98e-35	1.71e-33
OSM	4	-1.1143	-12.318	0.05537	0.80902	7.23e-35	1.77e-33
TMEM185A	4	0.98211	12.315	0.0049176	0.61455	7.56e-35	1.85e-33
PSD	4	-1.0121	-12.311	0.075857	0.82986	7.87e-35	1.92e-33
TMEM203	4	-1.0511	-12.31	0.067204	0.81677	8e-35	1.95e-33
L3MBTL4	4	-1.2636	-12.294	0.035124	0.76318	9.72e-35	2.37e-33
HAUS6	4	-1.1039	-12.289	0.057055	0.8093	1.04e-34	2.54e-33
VEGFB	4	-1.11	-12.282	0.056061	0.80902	1.13e-34	2.74e-33
RBM7	4	0.94787	12.28	0.0064347	0.63046	1.16e-34	2.82e-33
UBTFL1	4	-1.2085	-12.274	0.041475	0.79209	1.24e-34	3.01e-33
TICRR	4	-1.0661	-12.263	0.063971	0.81407	1.43e-34	3.45e-33
LSM2	4	-1.0043	-12.262	0.077552	0.83192	1.46e-34	3.51e-33
BRD2	4	-4.7112	-12.26	0.00027204	0.375	1.49e-34	3.58e-33
SPAG4	4	-1.1647	-12.259	0.047471	0.79877	1.51e-34	3.63e-33
DHODH	4	0.90973	12.254	0.0085169	0.65059	1.59e-34	3.83e-33
C18orf63	4	0.98687	12.254	0.0047502	0.61455	1.59e-34	3.83e-33
F11	4	1.0436	12.252	0.0029401	0.6	1.64e-34	3.92e-33
C8orf37	4	0.97375	12.248	0.0052315	0.61455	1.72e-34	4.13e-33
HS3ST3B1	4	-1.0817	-12.247	0.061177	0.81407	1.74e-34	4.15e-33
TNFAIP2	4	-1.1252	-12.247	0.053926	0.80902	1.74e-34	4.15e-33
C8orf86	4	-1.0799	-12.246	0.061407	0.81407	1.77e-34	4.22e-33
ATP2A3	4	-1.2101	-12.244	0.041339	0.79178	1.81e-34	4.3e-33
ZNF557	4	0.94974	12.242	0.0063092	0.63046	1.86e-34	4.43e-33
SCRN1	4	-1.0947	-12.23	0.058697	0.81407	2.16e-34	5.14e-33
PRIM2	4	-1.0952	-12.228	0.058551	0.81407	2.2e-34	5.23e-33
PIK3CG	4	0.97268	12.219	0.0052733	0.61455	2.47e-34	5.85e-33
OR9G1	4	0.93275	12.217	0.0072718	0.64202	2.53e-34	5.99e-33
ST6GAL2	4	-1.2865	-12.212	0.032906	0.75981	2.67e-34	6.32e-33
LYZL6	4	-1.021	-12.212	0.073827	0.82789	2.67e-34	6.32e-33
SERINC2	4	-0.99896	-12.208	0.078828	0.83315	2.8e-34	6.61e-33
TENM2	4	-1.0554	-12.203	0.06621	0.81677	2.98e-34	7.03e-33
METTL5	4	-1.135	-12.203	0.052304	0.80694	2.99e-34	7.03e-33
CYB5B	4	-1.0471	-12.201	0.068041	0.82057	3.08e-34	7.25e-33
ARL16	4	-1.0553	-12.185	0.066241	0.81677	3.72e-34	8.74e-33
ISCA2	4	-1.0748	-12.18	0.062286	0.81407	3.98e-34	9.34e-33
TSPAN5	4	-1.1867	-12.173	0.044206	0.79368	4.32e-34	1.01e-32
TMEM155	4	0.96463	12.173	0.0056291	0.62197	4.33e-34	1.01e-32
DDT	4	-1.0399	-12.165	0.069527	0.82291	4.79e-34	1.12e-32
NPTX1	4	0.93249	12.162	0.0072822	0.64202	4.93e-34	1.15e-32
PXMP2	4	-1.0758	-12.16	0.062066	0.81407	5.07e-34	1.18e-32
ADH1B	4	-1.1019	-12.159	0.057369	0.8093	5.13e-34	1.19e-32
F9	4	0.98182	12.153	0.004949	0.61455	5.51e-34	1.28e-32
CDK5RAP3	4	-1.0656	-12.152	0.064065	0.81407	5.6e-34	1.3e-32
SEC24C	4	-1.0165	-12.151	0.074863	0.82824	5.68e-34	1.32e-32
SLC39A1	4	-1.1084	-12.141	0.056333	0.80902	6.44e-34	1.49e-32
OR8K5	4	-1.0055	-12.139	0.07728	0.83192	6.53e-34	1.51e-32
OSMR	4	0.90241	12.124	0.0091133	0.65201	7.91e-34	1.83e-32
TEAD3	4	-0.96224	-12.116	0.088548	0.84695	8.7e-34	2.01e-32
TRAP1	4	-1.1528	-12.096	0.049343	0.80341	1.11e-33	2.56e-32
GATAD1	4	-4.4556	-12.095	0.00043945	0.4	1.12e-33	2.57e-32
LRG1	4	-1.1285	-12.094	0.05334	0.80902	1.14e-33	2.62e-32
ZNF232	4	0.94307	12.092	0.0067277	0.63861	1.16e-33	2.66e-32
SMIM4	4	-1.4041	-12.087	0.023113	0.71674	1.24e-33	2.86e-32
SFN	4	-1.1011	-12.081	0.057546	0.80942	1.33e-33	3.05e-32
CT45A10	4	-1.1269	-12.074	0.053675	0.80902	1.45e-33	3.32e-32
CD300LB	4	-1.0666	-12.073	0.063866	0.81407	1.47e-33	3.36e-32
CCDC57	4	-1.1218	-12.066	0.054334	0.80902	1.6e-33	3.65e-32
HSD17B3	4	0.94405	12.062	0.0066231	0.63618	1.67e-33	3.8e-32
ARID5A	4	-1.0866	-12.056	0.060183	0.81407	1.79e-33	4.08e-32
CBY3	4	-1.0369	-12.053	0.070102	0.82475	1.87e-33	4.26e-32
PVR	4	-1.0494	-12.051	0.067612	0.81846	1.93e-33	4.38e-32
SLC35A2	4	-1.111	-12.05	0.05582	0.80902	1.94e-33	4.39e-32
EVPLL	4	-0.96203	-12.046	0.08859	0.84695	2.05e-33	4.64e-32
ITPKA	4	0.9235	12.045	0.0077321	0.64202	2.06e-33	4.66e-32
DIS3L2	4	-1.0912	-12.04	0.059357	0.81407	2.18e-33	4.94e-32
FOXD4L1	4	-0.9281	-12.04	0.0983	0.85292	2.19e-33	4.96e-32
SPRR1A	4	0.89336	12.035	0.0099084	0.65201	2.32e-33	5.24e-32
NFKBIB	4	-1.0637	-12.03	0.064473	0.81407	2.48e-33	5.6e-32
SYT15	4	-1.0746	-12.024	0.062328	0.81407	2.67e-33	6.01e-32
CCDC12	4	-1.102	-12.022	0.057348	0.8093	2.72e-33	6.11e-32
LCTL	4	-1.0511	-12.022	0.067193	0.81677	2.72e-33	6.11e-32
ALPL	4	-0.95404	-12.019	0.090693	0.84865	2.84e-33	6.36e-32
TMEM262	4	-0.95359	-12.018	0.090787	0.84894	2.85e-33	6.38e-32
CLDN5	4	-1.103	-12.014	0.057201	0.8093	2.99e-33	6.68e-32
WRAP53	4	0.96539	12.005	0.0055977	0.62197	3.35e-33	7.5e-32
BSPRY	4	-0.9697	-12.004	0.086581	0.84495	3.37e-33	7.53e-32
ACSS3	4	-1.0405	-11.998	0.06938	0.82291	3.63e-33	8.09e-32
KIAA0226	4	-0.9608	-11.998	0.088883	0.84716	3.64e-33	8.11e-32
DHX9	4	-1.1887	-11.996	0.043955	0.79368	3.73e-33	8.31e-32
PGRMC1	4	0.88695	11.994	0.010411	0.65201	3.81e-33	8.47e-32
CA7	4	-0.98265	-11.994	0.083013	0.84047	3.84e-33	8.53e-32
FAM129B	4	-1.0799	-11.992	0.061407	0.81407	3.89e-33	8.63e-32
FAM214B	4	-5.397	-11.986	7.32e-05	0.175	4.19e-33	9.28e-32
ACHE	4	-1.0642	-11.985	0.064347	0.81407	4.24e-33	9.39e-32
RAB30	4	-1.2109	-11.984	0.041245	0.79177	4.31e-33	9.52e-32
C16orf47	4	-1.0855	-11.979	0.060382	0.81407	4.57e-33	1.01e-31
TAF2	4	-4.3298	-11.973	0.00053361	0.40769	4.95e-33	1.09e-31
VWA9	4	-1.1856	-11.969	0.044321	0.79368	5.14e-33	1.13e-31
TBC1D29	4	1.0623	11.969	0.0024588	0.5977	5.14e-33	1.13e-31
HTR3B	4	-1.1305	-11.968	0.052995	0.80902	5.26e-33	1.15e-31
DRG1	4	0.91105	11.965	0.0084227	0.65059	5.42e-33	1.19e-31
PDP1	4	-1.1438	-11.964	0.05084	0.80694	5.51e-33	1.21e-31
ZNF99	4	0.93022	11.947	0.0073659	0.64202	6.7e-33	1.47e-31
MSANTD4	4	-1.0996	-11.944	0.057756	0.81009	6.97e-33	1.53e-31
MTBP	4	-4.1441	-11.943	0.00055454	0.40769	7.06e-33	1.54e-31
TIMMDC1	4	-1.0002	-11.942	0.078598	0.83315	7.18e-33	1.57e-31
CHMP2A	4	-1.2868	-11.942	0.032864	0.75981	7.19e-33	1.57e-31
SPATA31A1	4	-1.014	-11.937	0.075438	0.82826	7.61e-33	1.66e-31
OR4D6	4	-1.2346	-11.936	0.038462	0.78008	7.67e-33	1.67e-31
NTPCR	4	-1.1371	-11.936	0.052085	0.80694	7.67e-33	1.67e-31
KCNAB2	4	-1.1015	-11.932	0.057431	0.80942	8.07e-33	1.75e-31
PUS7L	4	-1.0615	-11.926	0.064933	0.81427	8.67e-33	1.88e-31
INCA1	4	-1.0424	-11.921	0.068993	0.82291	9.24e-33	2e-31
CLDN8	4	-1.1403	-11.912	0.051415	0.80694	1.02e-32	2.22e-31
G2E3	4	-1.153	-11.91	0.049333	0.80341	1.05e-32	2.28e-31
WBSCR16	4	-1.0659	-11.909	0.064002	0.81407	1.06e-32	2.29e-31
FAM49A	4	0.896	11.906	0.0096887	0.65201	1.11e-32	2.38e-31
RAB6C	4	0.89908	11.904	0.0094167	0.65201	1.13e-32	2.43e-31
CFAP52	4	-1.0763	-11.9	0.061941	0.81407	1.19e-32	2.56e-31
DHX36	4	-1.031	-11.899	0.071378	0.82691	1.2e-32	2.57e-31
NRG2	4	-1.0596	-11.898	0.065394	0.81539	1.21e-32	2.59e-31
XRCC6	4	-0.96604	-11.896	0.087554	0.84512	1.24e-32	2.65e-31
SH2D3C	4	-1.0255	-11.894	0.072833	0.82789	1.26e-32	2.71e-31
RASD1	4	-1.0866	-11.892	0.060183	0.81407	1.31e-32	2.79e-31
CSRP3	4	-0.89575	-11.891	0.10885	0.86318	1.32e-32	2.82e-31
SKI	4	0.91669	11.89	0.0081088	0.64481	1.33e-32	2.85e-31
CETP	4	-1.048	-11.889	0.067842	0.8192	1.36e-32	2.89e-31
PNPT1	4	0.913	11.887	0.0083181	0.65059	1.39e-32	2.96e-31
TMEM233	4	-0.96856	-11.884	0.08677	0.84495	1.44e-32	3.06e-31
SLC38A11	4	-1.1259	-11.882	0.053863	0.80902	1.47e-32	3.13e-31
PATE1	4	0.93623	11.875	0.0070521	0.64202	1.59e-32	3.37e-31
SLC25A51	4	-1.2175	-11.873	0.040429	0.78616	1.64e-32	3.47e-31
CHMP6	4	-0.99932	-11.868	0.078765	0.83315	1.74e-32	3.67e-31
B3GNT6	4	-1.0151	-11.866	0.075177	0.82824	1.78e-32	3.75e-31
SLC5A7	4	-1.0532	-11.865	0.066848	0.81677	1.79e-32	3.79e-31
CHCHD1	4	-0.9172	-11.864	0.10168	0.85508	1.82e-32	3.84e-31
C17orf85	4	-1.1397	-11.857	0.051551	0.80694	1.97e-32	4.15e-31
PNPLA4	4	0.87988	11.855	0.010997	0.65201	2.03e-32	4.28e-31
HIGD2A	4	-1.0868	-11.849	0.060162	0.81407	2.19e-32	4.6e-31
PABPC1	4	-0.94635	-11.847	0.093068	0.84894	2.23e-32	4.68e-31
DEFB121	4	0.95189	11.847	0.006215	0.63046	2.23e-32	4.68e-31
CYP20A1	4	-1.0749	-11.841	0.062244	0.81407	2.41e-32	5.05e-31
CTRC	4	-1.0222	-11.839	0.073628	0.82789	2.44e-32	5.12e-31
PLA2G1B	4	-0.98319	-11.837	0.08293	0.84047	2.52e-32	5.28e-31
GFPT1	4	-1.2582	-11.835	0.035637	0.76693	2.58e-32	5.38e-31
TMEM238	4	-1.063	-11.828	0.06463	0.81407	2.8e-32	5.83e-31
TXNRD3	4	-1.0238	-11.825	0.073293	0.82789	2.9e-32	6.04e-31
MSGN1	4	0.89177	11.822	0.010024	0.65201	2.99e-32	6.23e-31
SKIL	4	-1.417	-11.821	0.022307	0.71674	3.05e-32	6.34e-31
CSNK1E	4	-0.94368	-11.813	0.093926	0.84894	3.35e-32	6.96e-31
EMC9	4	-1.1174	-11.809	0.054899	0.80902	3.52e-32	7.31e-31
CALM3	4	0.93252	11.804	0.0072822	0.64202	3.71e-32	7.69e-31
OR5T1	4	-1.5053	-11.8	0.017389	0.70232	3.92e-32	8.11e-31
ZC3H12A	4	-1.1141	-11.798	0.055391	0.80902	3.98e-32	8.23e-31
KIAA1143	4	-1.0617	-11.798	0.064912	0.81427	4.01e-32	8.28e-31
KIAA0907	4	-0.96679	-11.791	0.087282	0.84512	4.35e-32	8.98e-31
OPHN1	4	-1.3342	-11.787	0.028449	0.74073	4.56e-32	9.41e-31
GRHL2	4	-1.3921	-11.787	0.023866	0.71674	4.57e-32	9.41e-31
POLD1	4	-1.2248	-11.784	0.039571	0.78197	4.72e-32	9.72e-31
KIF26B	4	-1.0009	-11.783	0.07842	0.83315	4.8e-32	9.86e-31
MOB2	4	-1.0041	-11.777	0.077635	0.83192	5.15e-32	1.06e-30
KAT7	4	1.0744	11.771	0.0022182	0.58933	5.5e-32	1.13e-30
CDKL4	4	-1.1782	-11.768	0.045336	0.79368	5.73e-32	1.17e-30
PAN2	4	0.94871	11.761	0.0063929	0.63046	6.18e-32	1.26e-30
ZNF529	4	-1.004	-11.76	0.077677	0.83192	6.29e-32	1.29e-30
HNRNPC	4	-1.1543	-11.759	0.049071	0.80341	6.36e-32	1.3e-30
NUBP1	4	-1.0246	-11.757	0.073021	0.82789	6.48e-32	1.32e-30
ID4	4	-1.0045	-11.754	0.07752	0.83192	6.77e-32	1.38e-30
ATPAF1	4	-1.053	-11.749	0.066911	0.81677	7.18e-32	1.46e-30
SLC2A12	4	-0.98522	-11.744	0.082333	0.84047	7.56e-32	1.54e-30
USP29	4	-1.0785	-11.729	0.061596	0.81407	9.01e-32	1.83e-30
SYNGAP1	4	-1.019	-11.729	0.074266	0.82789	9.05e-32	1.84e-30
UBA1	4	-1.0334	-11.728	0.070855	0.82535	9.21e-32	1.87e-30
SLC29A2	4	-1.0287	-11.724	0.071964	0.82789	9.58e-32	1.94e-30
IMP4	4	-0.93223	-11.724	0.097013	0.85209	9.61e-32	1.94e-30
NCKAP1L	4	-1.2275	-11.723	0.039309	0.78197	9.7e-32	1.96e-30
ORM1	4	-1.0366	-11.72	0.070238	0.82475	1.01e-31	2.03e-30
VENTX	4	-1.2728	-11.72	0.034099	0.76079	1.01e-31	2.03e-30
JADE1	4	-1.0229	-11.706	0.073492	0.82789	1.19e-31	2.39e-30
MAGEC2	4	-0.95284	-11.701	0.091028	0.84894	1.26e-31	2.53e-30
RPL3	4	-1.0993	-11.698	0.057839	0.81009	1.31e-31	2.63e-30
TVP23C	4	0.95681	11.695	0.0060581	0.63046	1.35e-31	2.71e-30
DOC2A	4	-0.9297	-11.694	0.097829	0.85292	1.36e-31	2.73e-30
TMEM219	4	-1.0508	-11.694	0.067256	0.81677	1.37e-31	2.75e-30
PDLIM4	4	-1.056	-11.692	0.066147	0.81677	1.4e-31	2.79e-30
MAST3	4	0.89964	11.691	0.0093644	0.65201	1.42e-31	2.84e-30
SSR3	4	-1.0796	-11.69	0.061439	0.81407	1.43e-31	2.86e-30
VIM	4	-1.1303	-11.69	0.053047	0.80902	1.44e-31	2.86e-30
GP1BA	4	-1.4089	-11.689	0.022747	0.71674	1.46e-31	2.91e-30
IL21	4	-1.2301	-11.683	0.038985	0.78138	1.56e-31	3.1e-30
CMSS1	4	-1.1336	-11.68	0.052503	0.80804	1.61e-31	3.2e-30
AGER	4	-0.93746	-11.675	0.09559	0.85105	1.7e-31	3.38e-30
OTP	4	-1.0181	-11.673	0.074486	0.82789	1.75e-31	3.48e-30
FAM134A	4	0.88748	11.669	0.010337	0.65201	1.83e-31	3.64e-30
C2orf91	4	-0.97897	-11.669	0.083976	0.84204	1.84e-31	3.65e-30
PHF23	4	0.94625	11.667	0.0064975	0.63046	1.89e-31	3.74e-30
NUTF2	4	-1.0445	-11.666	0.068522	0.82235	1.91e-31	3.77e-30
GUSB	4	-0.95269	-11.666	0.091091	0.84894	1.91e-31	3.77e-30
FAM184B	4	-1.0647	-11.662	0.064274	0.81407	2e-31	3.94e-30
WNK1	4	0.92776	11.661	0.0074915	0.64202	2.01e-31	3.95e-30
CTR9	4	-0.93936	-11.66	0.09514	0.85009	2.05e-31	4.03e-30
OSGEPL1	4	-1.1126	-11.659	0.055569	0.80902	2.06e-31	4.06e-30
SYNGR1	4	-0.8936	-11.658	0.10953	0.8643	2.09e-31	4.1e-30
PPIAL4E	4	-1.0474	-11.653	0.067926	0.8197	2.21e-31	4.33e-30
DEFB4B	4	-1.2221	-11.652	0.039791	0.78197	2.24e-31	4.4e-30
FAM9B	4	-1.3297	-11.652	0.028857	0.7424	2.25e-31	4.4e-30
TEX26	4	-1.1712	-11.65	0.04633	0.79462	2.3e-31	4.51e-30
FAU	4	-0.89194	-11.641	0.11014	0.86634	2.56e-31	4.99e-30
COL2A1	4	-1.046	-11.633	0.06825	0.82127	2.79e-31	5.44e-30
TTC30A	4	-1.034	-11.633	0.070709	0.82488	2.81e-31	5.48e-30
OR51A4	4	-0.98031	-11.632	0.083673	0.84204	2.84e-31	5.53e-30
ZNF853	4	-0.98916	-11.63	0.081224	0.83595	2.89e-31	5.63e-30
ZNF281	4	-1.0215	-11.624	0.073754	0.82789	3.11e-31	6.05e-30
ENAH	4	-1.075	-11.621	0.062223	0.81407	3.23e-31	6.27e-30
AHNAK2	4	-1.0736	-11.615	0.062527	0.81407	3.47e-31	6.73e-30
HPS1	4	-1.0551	-11.612	0.066346	0.81677	3.58e-31	6.93e-30
MAGEA12	4	-1.2245	-11.606	0.039592	0.78197	3.86e-31	7.48e-30
LEFTY2	4	-1.0723	-11.6	0.062799	0.81407	4.1e-31	7.94e-30
GPR89B	4	-0.9851	-11.6	0.082354	0.84047	4.14e-31	8e-30
GDF5	4	-0.9945	-11.599	0.079916	0.83437	4.15e-31	8.02e-30
RPUSD1	4	-0.93548	-11.588	0.096113	0.85209	4.72e-31	9.1e-30
GOPC	4	0.92416	11.584	0.0076798	0.64202	4.95e-31	9.54e-30
FTSJ1	4	-1.0742	-11.583	0.062422	0.81407	5e-31	9.63e-30
ZNF606	4	-1.0344	-11.582	0.070636	0.82488	5.06e-31	9.74e-30
SUCNR1	4	-1.2001	-11.581	0.042563	0.79209	5.14e-31	9.88e-30
SPAG1	4	-1.178	-11.577	0.045368	0.79368	5.39e-31	1.03e-29
GCC2	4	0.92704	11.574	0.0075229	0.64202	5.56e-31	1.07e-29
SKP1	4	0.88258	11.566	0.010714	0.65201	6.15e-31	1.18e-29
CDC14A	4	0.90138	11.562	0.0091865	0.65201	6.42e-31	1.23e-29
ISY1-RAB43	4	-1.023	-11.56	0.073461	0.82789	6.54e-31	1.25e-29
CRYGA	4	-1.0853	-11.56	0.060434	0.81407	6.56e-31	1.25e-29
SPG20	4	-1.0145	-11.554	0.075365	0.82826	7.06e-31	1.35e-29
ADAM17	4	-1.2628	-11.553	0.035218	0.76413	7.13e-31	1.36e-29
OR4K1	4	-1.1733	-11.548	0.046006	0.79368	7.56e-31	1.44e-29
FTL	4	-1.0634	-11.547	0.064536	0.81407	7.64e-31	1.45e-29
JUN	4	-1.1024	-11.541	0.057306	0.8093	8.24e-31	1.57e-29
LOR	4	-0.92886	-11.539	0.098017	0.85292	8.4e-31	1.6e-29
QARS	4	-1.1073	-11.536	0.056563	0.8093	8.73e-31	1.66e-29
TCF20	4	-1.0491	-11.532	0.067675	0.81846	9.11e-31	1.73e-29
PDE1B	4	-1.0118	-11.531	0.075867	0.82986	9.2e-31	1.74e-29
CSPG4	4	-0.96491	-11.53	0.087795	0.84512	9.35e-31	1.77e-29
STAT2	4	-0.96185	-11.529	0.088632	0.84695	9.37e-31	1.77e-29
LYNX1	4	-0.90219	-11.527	0.10684	0.86045	9.66e-31	1.82e-29
RELB	4	0.8979	11.517	0.0095004	0.65201	1.08e-30	2.04e-29
SNAPC3	4	-1.3743	-11.516	0.025038	0.72168	1.1e-30	2.07e-29
BCR	4	-1.1118	-11.508	0.055694	0.80902	1.21e-30	2.28e-29
43709	4	-1.0263	-11.505	0.072571	0.82789	1.25e-30	2.35e-29
FASTKD3	4	-0.97171	-11.504	0.085828	0.84495	1.26e-30	2.36e-29
COL4A1	4	-0.91809	-11.504	0.1014	0.85416	1.26e-30	2.36e-29
ATP6V1B2	4	-1.1225	-11.501	0.054292	0.80902	1.3e-30	2.43e-29
BLOC1S5	4	-1.052	-11.501	0.067057	0.81677	1.3e-30	2.44e-29
DRAP1	4	-1.0381	-11.498	0.069903	0.82475	1.35e-30	2.52e-29
GRIA2	4	-1.0627	-11.496	0.064703	0.81407	1.38e-30	2.58e-29
SPAG11A	4	-1.0519	-11.496	0.067078	0.81677	1.39e-30	2.59e-29
RRAGD	4	-1.0136	-11.496	0.075522	0.8287	1.39e-30	2.59e-29
ZC2HC1B	4	-0.93519	-11.491	0.096259	0.85209	1.46e-30	2.72e-29
PRDM5	4	-0.98333	-11.49	0.082919	0.84047	1.49e-30	2.77e-29
INTS4	4	-0.91403	-11.489	0.10273	0.85573	1.49e-30	2.77e-29
ZMYM2	4	-0.94029	-11.482	0.094826	0.85009	1.63e-30	3.02e-29
HTR1B	4	-1.032	-11.48	0.071127	0.82611	1.65e-30	3.07e-29
DUSP7	4	0.87968	11.48	0.011018	0.65201	1.67e-30	3.1e-29
KRT71	4	-1.0191	-11.474	0.074235	0.82789	1.79e-30	3.32e-29
KMT2E	4	-0.92123	-11.471	0.10018	0.85346	1.85e-30	3.42e-29
C22orf39	4	-1.0069	-11.468	0.077018	0.83192	1.9e-30	3.52e-29
POGLUT1	4	-1.0639	-11.466	0.06441	0.81407	1.96e-30	3.62e-29
TLR2	4	-4.3402	-11.459	0.00053361	0.40769	2.11e-30	3.89e-29
C19orf57	4	-1.07	-11.459	0.063186	0.81407	2.13e-30	3.92e-29
ANKAR	4	0.88091	11.458	0.010871	0.65201	2.15e-30	3.96e-29
WIPI2	4	0.88339	11.453	0.010641	0.65201	2.28e-30	4.2e-29
RBM44	4	-1.0535	-11.447	0.066754	0.81677	2.45e-30	4.5e-29
ADAM15	4	-0.91883	-11.442	0.10107	0.85398	2.58e-30	4.73e-29
HOXA10	4	-1.1075	-11.441	0.056542	0.8093	2.62e-30	4.8e-29
DNAAF2	4	0.87334	11.436	0.011363	0.66131	2.78e-30	5.09e-29
OR2T2	4	-0.9788	-11.43	0.084018	0.84204	2.96e-30	5.43e-29
CEACAM19	4	-1.0101	-11.43	0.076265	0.83113	2.98e-30	5.44e-29
MSLN	4	-0.921	-11.429	0.10025	0.85346	2.99e-30	5.47e-29
GUCA1B	4	-0.93084	-11.428	0.097463	0.85292	3.03e-30	5.54e-29
DIEXF	4	0.86859	11.426	0.011886	0.66628	3.12e-30	5.68e-29
OR1C1	4	-1.0031	-11.425	0.077897	0.83192	3.12e-30	5.69e-29
TAF4	4	-0.89506	-11.423	0.10902	0.8633	3.22e-30	5.86e-29
ANKRD44	4	-1.0021	-11.421	0.078106	0.83268	3.27e-30	5.94e-29
HEATR3	4	-1.1596	-11.417	0.048339	0.80139	3.43e-30	6.22e-29
KIF23	4	-1.0257	-11.413	0.072801	0.82789	3.6e-30	6.53e-29
ADSS	4	0.9463	11.413	0.0064975	0.63046	3.61e-30	6.55e-29
FARS2	4	-1.0624	-11.411	0.064776	0.81407	3.71e-30	6.71e-29
GALNT10	4	-1.2746	-11.408	0.03389	0.76056	3.81e-30	6.89e-29
HPDL	4	0.85092	11.399	0.013707	0.68104	4.23e-30	7.66e-29
PGLYRP3	4	-0.9142	-11.398	0.10265	0.85573	4.26e-30	7.7e-29
RNF128	4	-0.97367	-11.391	0.085315	0.84495	4.65e-30	8.4e-29
SLC22A20	4	-0.8944	-11.39	0.10922	0.86402	4.69e-30	8.46e-29
SOD3	4	-0.96378	-11.389	0.088109	0.84621	4.74e-30	8.54e-29
PPP1R8	4	-0.90225	-11.381	0.10684	0.86045	5.21e-30	9.37e-29
CT47A12	4	-1.0489	-11.38	0.067706	0.81846	5.24e-30	9.42e-29
PLXNB1	4	-1.0185	-11.38	0.074413	0.82789	5.28e-30	9.49e-29
ENTPD8	4	-1.0495	-11.376	0.06758	0.81846	5.49e-30	9.85e-29
OR51I1	4	-1.0199	-11.373	0.074036	0.82789	5.71e-30	1.02e-28
GRIN2B	4	-1.0408	-11.37	0.069296	0.82291	5.88e-30	1.05e-28
CCDC88A	4	-1.0738	-11.366	0.062506	0.81407	6.19e-30	1.11e-28
SELE	4	-0.98344	-11.362	0.082909	0.84047	6.49e-30	1.16e-28
SRPK2	4	-1.1568	-11.361	0.04881	0.80341	6.57e-30	1.17e-28
C9orf50	4	-1.0026	-11.354	0.077991	0.83192	7.12e-30	1.27e-28
KHK	4	-1.1623	-11.35	0.047805	0.8	7.41e-30	1.32e-28
RNF215	4	-0.92662	-11.35	0.098656	0.85292	7.43e-30	1.32e-28
GATAD2B	4	-1.0041	-11.346	0.077635	0.83192	7.73e-30	1.38e-28
ADAMTS10	4	0.86556	11.342	0.012095	0.6691	8.12e-30	1.44e-28
ANP32A	4	-1.2418	-11.337	0.037604	0.77708	8.58e-30	1.52e-28
MAT2A	4	-0.92619	-11.337	0.098792	0.85322	8.63e-30	1.53e-28
NUDT4	4	-0.96479	-11.329	0.087805	0.84512	9.41e-30	1.67e-28
AQP10	4	-1.003	-11.319	0.077907	0.83192	1.05e-29	1.86e-28
AMICA1	4	0.83072	11.319	0.015778	0.69333	1.06e-29	1.87e-28
PPEF1	4	-1.16	-11.318	0.048234	0.80035	1.07e-29	1.9e-28
BNIP2	4	-1.0719	-11.313	0.062841	0.81407	1.13e-29	2e-28
PALM2	4	-1.0185	-11.313	0.074413	0.82789	1.13e-29	2e-28
RPS28	4	-0.89604	-11.312	0.10879	0.86318	1.14e-29	2.01e-28
NDUFA4	4	0.93363	11.311	0.0071985	0.64202	1.15e-29	2.03e-28
TCEAL3	4	-0.91271	-11.309	0.10318	0.85573	1.18e-29	2.08e-28
OR12D3	4	0.87511	11.305	0.011258	0.66012	1.24e-29	2.18e-28
SPATA32	4	0.84969	11.302	0.013822	0.6812	1.28e-29	2.24e-28
FZD4	4	-0.99795	-11.301	0.078996	0.83315	1.3e-29	2.28e-28
FAM124A	4	-1.1359	-11.3	0.052179	0.80694	1.32e-29	2.31e-28
YBX2	4	-0.99812	-11.299	0.078954	0.83315	1.32e-29	2.31e-28
MEDAG	4	0.85806	11.294	0.012922	0.67769	1.4e-29	2.46e-28
SCAPER	4	-1.0514	-11.286	0.067141	0.81677	1.53e-29	2.68e-28
ZNF383	4	-1.0409	-11.282	0.069286	0.82291	1.61e-29	2.81e-28
TARDBP	4	0.86068	11.279	0.012639	0.67298	1.66e-29	2.89e-28
CCDC130	4	0.87693	11.279	0.011174	0.65723	1.67e-29	2.9e-28
VPS16	4	-0.91491	-11.278	0.10243	0.85573	1.69e-29	2.95e-28
FAM134B	4	-1.068	-11.276	0.063584	0.81407	1.73e-29	3.01e-28
RPS15A	4	-1.0445	-11.275	0.068522	0.82235	1.75e-29	3.04e-28
RASGRP3	4	-1.0057	-11.274	0.077227	0.83192	1.75e-29	3.05e-28
FREM3	4	-0.97789	-11.264	0.084258	0.84204	1.99e-29	3.45e-28
TRIM27	4	0.85584	11.261	0.013131	0.67769	2.05e-29	3.55e-28
EPHA3	4	0.89779	11.26	0.0095004	0.65201	2.06e-29	3.57e-28
RMDN2	4	-1.0849	-11.258	0.06056	0.81407	2.1e-29	3.64e-28
CPED1	4	-1.0508	-11.257	0.067256	0.81677	2.15e-29	3.72e-28
C3orf70	4	-1.011	-11.254	0.076066	0.83086	2.22e-29	3.84e-28
NDUFA11	4	0.86229	11.244	0.012461	0.6691	2.48e-29	4.27e-28
HIC2	4	-1.006	-11.244	0.077154	0.83192	2.48e-29	4.28e-28
HIST1H2AJ	4	-0.98478	-11.243	0.082438	0.84047	2.52e-29	4.35e-28
LRRC8E	4	0.8323	11.241	0.015642	0.69333	2.57e-29	4.42e-28
UPF3A	4	0.86495	11.239	0.012127	0.6691	2.61e-29	4.5e-28
ACTL6B	4	-0.94392	-11.229	0.093895	0.84894	2.93e-29	5.04e-28
SYNCRIP	4	0.91697	11.228	0.008067	0.64481	2.98e-29	5.11e-28
HOXA5	4	-1.0401	-11.226	0.069474	0.82291	3.03e-29	5.21e-28
CCDC73	4	-1.1862	-11.221	0.044279	0.79368	3.22e-29	5.52e-28
CD5L	4	-0.94435	-11.22	0.093759	0.84894	3.26e-29	5.59e-28
EP300	4	-0.87772	-11.214	0.11476	0.86867	3.47e-29	5.94e-28
ATP13A3	4	-1.0231	-11.213	0.073429	0.82789	3.51e-29	5.99e-28
CLRN3	4	-0.97067	-11.212	0.086267	0.84495	3.54e-29	6.05e-28
CREBBP	4	-1.0628	-11.212	0.064693	0.81407	3.56e-29	6.08e-28
HSD3B1	4	0.86127	11.211	0.012587	0.67298	3.61e-29	6.16e-28
RPS16	4	-0.84744	-11.211	0.126	0.88505	3.62e-29	6.16e-28
KCNA1	4	-0.98991	-11.206	0.081036	0.83595	3.8e-29	6.47e-28
GPR160	4	0.90076	11.2	0.0092074	0.65201	4.07e-29	6.92e-28
RANGAP1	4	-0.88293	-11.2	0.11313	0.86867	4.1e-29	6.96e-28
ATXN3	4	-1.1508	-11.199	0.049615	0.80509	4.12e-29	6.99e-28
ARHGAP10	4	0.85651	11.197	0.013079	0.67769	4.23e-29	7.18e-28
DMRTB1	4	-0.98708	-11.195	0.081862	0.83994	4.3e-29	7.28e-28
LUZP2	4	0.84664	11.194	0.014104	0.6812	4.35e-29	7.36e-28
PCNXL4	4	-1.2538	-11.191	0.036212	0.76997	4.52e-29	7.64e-28
RNF125	4	-0.93607	-11.186	0.095883	0.85209	4.75e-29	8.03e-28
CEBPE	4	-0.94887	-11.186	0.092346	0.84894	4.78e-29	8.08e-28
BAZ2B	4	0.8423	11.183	0.014554	0.6848	4.95e-29	8.34e-28
THBS4	4	0.86388	11.182	0.012263	0.6691	5.01e-29	8.44e-28
CLN5	4	-1.0766	-11.181	0.061857	0.81407	5.07e-29	8.54e-28
RGPD5	4	-0.96404	-11.18	0.087994	0.84608	5.11e-29	8.6e-28
TUBA8	4	-0.96909	-11.178	0.086696	0.84495	5.25e-29	8.82e-28
SPOCD1	4	0.8287	11.175	0.01604	0.69644	5.39e-29	9.05e-28
WDR3	4	-0.96762	-11.172	0.087021	0.84495	5.57e-29	9.34e-28
FNDC1	4	-0.98063	-11.172	0.083547	0.84204	5.59e-29	9.37e-28
FRK	4	0.86218	11.157	0.012461	0.6691	6.58e-29	1.1e-27
SOD1	4	-4.6179	-11.155	0.0003662	0.4	6.77e-29	1.13e-27
SCGB2A2	4	-1.0864	-11.152	0.060225	0.81407	6.99e-29	1.17e-27
PLA2G4C	4	-0.96262	-11.15	0.088433	0.84689	7.16e-29	1.2e-27
DCBLD2	4	-0.91274	-11.145	0.10313	0.85573	7.56e-29	1.26e-27
IFFO1	4	-0.93105	-11.144	0.097369	0.85292	7.64e-29	1.27e-27
NUP98	4	-0.91467	-11.134	0.10248	0.85573	8.57e-29	1.43e-27
EEFSEC	4	0.83448	11.131	0.015475	0.69333	8.83e-29	1.47e-27
TBP	4	-0.93927	-11.123	0.095171	0.85009	9.66e-29	1.61e-27
FBXO10	4	0.8599	11.121	0.012702	0.67444	9.91e-29	1.65e-27
GNRH2	4	-0.95448	-11.119	0.090536	0.84865	1.01e-28	1.69e-27
PSMA7	4	-0.92976	-11.103	0.097829	0.85292	1.21e-28	2.01e-27
MMEL1	4	-0.99749	-11.102	0.079121	0.83315	1.23e-28	2.04e-27
LHFPL4	4	-0.98738	-11.1	0.081768	0.83942	1.26e-28	2.09e-27
ARL3	4	0.90199	11.097	0.0091133	0.65201	1.29e-28	2.14e-27
KCNG3	4	-0.9599	-11.095	0.089082	0.84716	1.33e-28	2.2e-27
RLN2	4	-0.92382	-11.083	0.099398	0.85322	1.52e-28	2.51e-27
VEPH1	4	0.87106	11.082	0.011614	0.66131	1.54e-28	2.54e-27
MC3R	4	-0.98078	-11.081	0.083474	0.84204	1.55e-28	2.56e-27
OR4F4	4	-0.92915	-11.073	0.097934	0.85292	1.69e-28	2.79e-27
BPTF	4	-0.94877	-11.07	0.092388	0.84894	1.75e-28	2.88e-27
ASMTL	4	-0.99564	-11.069	0.079602	0.83437	1.78e-28	2.93e-27
CREB3L1	4	-1.1165	-11.065	0.054993	0.80902	1.86e-28	3.06e-27
THAP7	4	-0.90261	-11.062	0.10672	0.86045	1.92e-28	3.15e-27
CENPA	4	-1.0542	-11.061	0.066618	0.81677	1.93e-28	3.17e-27
NRF1	4	0.85667	11.06	0.013058	0.67769	1.97e-28	3.22e-27
TMEM40	4	-0.9785	-11.058	0.084122	0.84204	2e-28	3.28e-27
GDAP2	4	0.91941	11.055	0.0078996	0.64202	2.06e-28	3.38e-27
MARK2	4	-0.97247	-11.053	0.085671	0.84495	2.11e-28	3.45e-27
AKNA	4	-0.95403	-11.053	0.090693	0.84865	2.13e-28	3.47e-27
RAD9A	4	-0.9514	-11.052	0.091467	0.84894	2.14e-28	3.5e-27
GTF2I	4	-1.0796	-11.049	0.061449	0.81407	2.21e-28	3.61e-27
ABLIM2	4	0.88849	11.045	0.010233	0.65201	2.32e-28	3.78e-27
MICAL3	4	-1.0502	-11.039	0.067403	0.81751	2.48e-28	4.04e-27
C11orf97	4	-0.96148	-11.032	0.088695	0.84695	2.69e-28	4.37e-27
SON	4	-0.89939	-11.03	0.10761	0.86162	2.74e-28	4.45e-27
ACAD11	4	0.88686	11.027	0.010411	0.65201	2.82e-28	4.58e-27
SLC27A2	4	-1.0686	-11.027	0.063406	0.81407	2.83e-28	4.6e-27
SNF8	4	-0.8555	-11.024	0.12293	0.8804	2.92e-28	4.73e-27
OR1A2	4	-0.99743	-11.024	0.079121	0.83315	2.93e-28	4.75e-27
OAS2	4	-0.88769	-11.023	0.11158	0.86867	2.97e-28	4.81e-27
DNAJC5	4	-1.0152	-11.016	0.075156	0.82824	3.2e-28	5.18e-27
HARS	4	-0.97307	-11.015	0.085524	0.84495	3.22e-28	5.21e-27
ARNT2	4	-0.91231	-11.015	0.10331	0.85573	3.24e-28	5.23e-27
FAM131B	4	-0.92772	-11.014	0.098404	0.85292	3.28e-28	5.28e-27
SH3BP1	4	-0.90645	-11.006	0.10543	0.85928	3.57e-28	5.75e-27
NIPAL4	4	-0.98262	-11.004	0.083013	0.84047	3.66e-28	5.89e-27
ZSWIM2	4	-0.92351	-11.002	0.099482	0.85322	3.74e-28	6.01e-27
ANKRD35	4	-1.0179	-11.002	0.074538	0.82789	3.75e-28	6.03e-27
CASQ1	4	-0.99449	-11.002	0.079916	0.83437	3.75e-28	6.03e-27
KALRN	4	-0.92507	-11.001	0.099105	0.85322	3.76e-28	6.04e-27
CAAP1	4	-1.0145	-10.998	0.075365	0.82826	3.9e-28	6.26e-27
UGT1A1	4	-0.88875	-10.995	0.11125	0.86867	4.04e-28	6.48e-27
LCAT	4	-0.97729	-10.995	0.084426	0.84204	4.05e-28	6.48e-27
ZNF354A	4	-1.482	-10.993	0.018687	0.7025	4.12e-28	6.59e-27
PSMB3	4	-0.85688	-10.992	0.12243	0.87934	4.19e-28	6.69e-27
CENPM	4	0.86591	10.99	0.012064	0.6691	4.28e-28	6.83e-27
FAM109A	4	-0.88216	-10.989	0.11329	0.86867	4.33e-28	6.91e-27
MYPN	4	-1.0166	-10.987	0.074852	0.82824	4.4e-28	7.01e-27
PIH1D1	4	-0.95945	-10.981	0.089155	0.84716	4.74e-28	7.54e-27
PTK2	4	-0.86586	-10.978	0.11896	0.8727	4.89e-28	7.78e-27
GPD2	4	0.82568	10.974	0.016511	0.69978	5.07e-28	8.07e-27
WDR83OS	4	0.81352	10.974	0.01807	0.7025	5.09e-28	8.08e-27
OR7G1	4	-1.0189	-10.972	0.074277	0.82789	5.22e-28	8.29e-27
ZNF835	4	-0.9569	-10.969	0.089835	0.848	5.37e-28	8.52e-27
CCKBR	4	-0.94137	-10.965	0.094512	0.84976	5.62e-28	8.91e-27
TIPARP	4	-0.89986	-10.959	0.1075	0.86119	6.03e-28	9.56e-27
EMP3	4	-0.91048	-10.958	0.10397	0.85698	6.11e-28	9.66e-27
NVL	4	-1.0893	-10.956	0.059723	0.81407	6.2e-28	9.8e-27
AHCYL1	4	0.83685	10.956	0.015255	0.69333	6.21e-28	9.82e-27
DOT1L	4	-0.92267	-10.956	0.099806	0.85322	6.24e-28	9.85e-27
TP53TG3C	4	-0.97812	-10.953	0.084175	0.84204	6.42e-28	1.01e-26
MEIG1	4	-1.0538	-10.952	0.06667	0.81677	6.51e-28	1.03e-26
FUT9	4	-0.94323	-10.951	0.093999	0.84894	6.54e-28	1.03e-26
TSC22D1	4	-0.94876	-10.95	0.092388	0.84894	6.63e-28	1.04e-26
PAX3	4	-1.0855	-10.949	0.060382	0.81407	6.7e-28	1.05e-26
ATG9A	4	-0.91459	-10.949	0.10253	0.85573	6.75e-28	1.06e-26
OTULIN	4	-1.0245	-10.947	0.073021	0.82789	6.84e-28	1.07e-26
RHOB	4	-0.9578	-10.942	0.089615	0.84716	7.29e-28	1.14e-26
POLR3A	4	-0.96011	-10.938	0.08905	0.84716	7.59e-28	1.19e-26
RSRC1	4	-1.0839	-10.937	0.060832	0.81407	7.69e-28	1.2e-26
ZNF680	4	-1.051	-10.935	0.067214	0.81677	7.85e-28	1.23e-26
MFSD10	4	0.84901	10.934	0.013905	0.6812	7.91e-28	1.24e-26
EBLN1	4	-1.1535	-10.933	0.04927	0.80341	8e-28	1.25e-26
EPHB6	4	0.81067	10.93	0.018404	0.7025	8.33e-28	1.3e-26
CDKN1A	4	-0.91432	-10.927	0.10263	0.85573	8.6e-28	1.34e-26
CRKL	4	-0.88104	-10.924	0.11369	0.86867	8.83e-28	1.38e-26
C2orf76	4	0.8643	10.924	0.0122	0.6691	8.87e-28	1.38e-26
IL7	4	0.82327	10.923	0.01694	0.70232	8.94e-28	1.39e-26
TMEM160	4	-0.99526	-10.922	0.079686	0.83437	9.05e-28	1.41e-26
PRAMEF6	4	-0.91652	-10.921	0.10191	0.85529	9.16e-28	1.42e-26
MCTP2	4	-1.0447	-10.921	0.06848	0.82235	9.16e-28	1.42e-26
NPS	4	-1.0414	-10.92	0.069192	0.82291	9.23e-28	1.43e-26
SLC25A12	4	-0.94343	-10.918	0.093968	0.84894	9.42e-28	1.46e-26
ANXA2	4	-0.86443	-10.918	0.11954	0.87319	9.5e-28	1.47e-26
MED9	4	-0.82478	-10.914	0.13533	0.89695	9.9e-28	1.53e-26
POLL	4	-0.91993	-10.912	0.10064	0.85359	1.01e-27	1.56e-26
GIPR	4	-0.94422	-10.909	0.093832	0.84894	1.04e-27	1.6e-26
PSMA4	4	-0.96737	-10.909	0.087125	0.84495	1.04e-27	1.61e-26
OLIG2	4	-0.9299	-10.909	0.097829	0.85292	1.04e-27	1.61e-26
C1orf106	4	-0.86223	-10.907	0.12043	0.87529	1.07e-27	1.65e-26
TCFL5	4	-0.98338	-10.906	0.082919	0.84047	1.08e-27	1.66e-26
TRIM52	4	-0.93931	-10.905	0.09515	0.85009	1.09e-27	1.67e-26
FAM195A	4	-0.94021	-10.904	0.094847	0.85009	1.11e-27	1.7e-26
SCN4B	4	-0.93887	-10.902	0.095276	0.85009	1.12e-27	1.72e-26
CCDC153	4	-0.85317	-10.902	0.12394	0.88158	1.13e-27	1.73e-26
RAD51C	4	-0.90245	-10.897	0.10676	0.86045	1.2e-27	1.83e-26
PSAP	4	-0.93366	-10.895	0.096678	0.85209	1.21e-27	1.86e-26
OR5M1	4	0.87978	10.889	0.011007	0.65201	1.3e-27	1.99e-26
FBXO41	4	-0.89145	-10.889	0.11028	0.86634	1.3e-27	1.99e-26
CEP78	4	-1.0332	-10.887	0.070918	0.82558	1.32e-27	2.02e-26
GNG12	4	-0.93591	-10.887	0.095925	0.85209	1.32e-27	2.02e-26
C3orf33	4	-1.1381	-10.887	0.051792	0.80694	1.33e-27	2.04e-26
CR1	4	-0.84365	-10.884	0.12752	0.88737	1.38e-27	2.1e-26
TUBB4A	4	0.81961	10.882	0.01741	0.70232	1.4e-27	2.13e-26
OR14J1	4	-0.97731	-10.879	0.084426	0.84204	1.45e-27	2.2e-26
XPC	4	-0.97996	-10.874	0.083714	0.84204	1.53e-27	2.32e-26
BPIFA1	4	-0.90828	-10.868	0.10479	0.85855	1.63e-27	2.48e-26
USPL1	4	-0.97923	-10.867	0.08384	0.84204	1.65e-27	2.5e-26
PTPRT	4	0.88313	10.864	0.010672	0.65201	1.71e-27	2.6e-26
B4GALT6	4	-1.0197	-10.863	0.074067	0.82789	1.72e-27	2.61e-26
NOXO1	4	-0.94635	-10.861	0.093058	0.84894	1.77e-27	2.69e-26
LRRC15	4	-0.87001	-10.86	0.11743	0.8727	1.8e-27	2.72e-26
ICOSLG	4	-0.92679	-10.859	0.098603	0.85292	1.8e-27	2.72e-26
PNPLA5	4	0.80646	10.858	0.019001	0.7025	1.83e-27	2.77e-26
RGS1	4	-1.0043	-10.846	0.077552	0.83192	2.09e-27	3.16e-26
SCAI	4	-1.1147	-10.841	0.055339	0.80902	2.19e-27	3.3e-26
SPPL2C	4	-0.85939	-10.841	0.12153	0.87893	2.2e-27	3.31e-26
LIMS2	4	-0.95993	-10.838	0.089082	0.84716	2.28e-27	3.44e-26
ANKRD20A2	4	-0.90957	-10.837	0.10435	0.8577	2.29e-27	3.45e-26
OR51M1	4	0.80365	10.827	0.019367	0.70321	2.57e-27	3.86e-26
APBB2	4	0.85034	10.826	0.01378	0.6812	2.6e-27	3.91e-26
GPX5	4	-0.86034	-10.825	0.12119	0.87824	2.63e-27	3.94e-26
MYH15	4	-0.92831	-10.817	0.098227	0.85292	2.87e-27	4.3e-26
MINA	4	-0.90986	-10.816	0.10418	0.85762	2.89e-27	4.34e-26
SKA1	4	0.8465	10.815	0.014115	0.6812	2.94e-27	4.4e-26
NBL1	4	-0.92368	-10.813	0.09943	0.85322	2.99e-27	4.47e-26
ERCC6	4	-0.9928	-10.811	0.080324	0.83457	3.05e-27	4.57e-26
LCT	4	0.86109	10.808	0.012608	0.67298	3.15e-27	4.71e-26
CCNJL	4	-0.95092	-10.803	0.091593	0.84894	3.34e-27	4.98e-26
MUM1	4	0.84123	10.803	0.0147	0.68537	3.35e-27	5e-26
SLC35A5	4	-1.0076	-10.792	0.07683	0.83192	3.75e-27	5.59e-26
ZNF397	4	1.0248	10.789	0.0033272	0.6	3.86e-27	5.75e-26
ZPBP2	4	-1.0323	-10.788	0.071054	0.82611	3.93e-27	5.85e-26
B3GALT1	4	-1.0283	-10.788	0.07208	0.82789	3.94e-27	5.86e-26
TUBB4B	4	-0.95947	-10.784	0.089155	0.84716	4.09e-27	6.08e-26
ASPG	4	0.86376	10.784	0.012273	0.6691	4.11e-27	6.1e-26
ILVBL	4	-0.90808	-10.78	0.10489	0.85884	4.29e-27	6.36e-26
SPTLC3	4	0.8151	10.777	0.017892	0.7025	4.44e-27	6.59e-26
CCR1	4	-1.0169	-10.774	0.074779	0.82824	4.58e-27	6.79e-26
SH3BGRL	4	0.82141	10.772	0.017159	0.70232	4.67e-27	6.92e-26
FGF16	4	-0.94218	-10.772	0.094261	0.8491	4.68e-27	6.92e-26
CLASRP	4	-0.96369	-10.771	0.08814	0.84621	4.71e-27	6.96e-26
SCNM1	4	-0.86057	-10.766	0.12108	0.87824	4.97e-27	7.34e-26
SLBP	4	-0.96547	-10.765	0.087638	0.84512	5.05e-27	7.45e-26
HIST2H2AA4	4	-1.0174	-10.763	0.074632	0.82824	5.16e-27	7.61e-26
ACSL1	4	-1.0029	-10.761	0.077939	0.83192	5.28e-27	7.79e-26
ISYNA1	4	0.8382	10.749	0.015025	0.68873	5.97e-27	8.8e-26
FSD1L	4	-0.93937	-10.749	0.095129	0.85009	5.99e-27	8.81e-26
UXT	4	0.89709	10.748	0.009605	0.65201	6.08e-27	8.93e-26
ENDOU	4	-0.94715	-10.746	0.092786	0.84894	6.17e-27	9.07e-26
TADA2B	4	-0.95401	-10.743	0.090693	0.84865	6.4e-27	9.4e-26
GSPT1	4	-1.0237	-10.736	0.073293	0.82789	6.9e-27	1.01e-25
MYOG	4	-0.84995	-10.731	0.12497	0.88471	7.32e-27	1.07e-25
ARHGDIA	4	-0.95206	-10.728	0.091206	0.84894	7.54e-27	1.1e-25
POLR1A	4	-1.1095	-10.723	0.056123	0.80902	7.91e-27	1.16e-25
OLFM2	4	-0.95447	-10.718	0.090547	0.84865	8.35e-27	1.22e-25
F5	4	-0.91785	-10.718	0.10145	0.85416	8.37e-27	1.22e-25
HIST1H2BO	4	-0.88721	-10.717	0.11177	0.86867	8.49e-27	1.24e-25
ZNF280A	4	-0.97689	-10.716	0.08453	0.84204	8.52e-27	1.24e-25
NR6A1	4	0.84006	10.712	0.014826	0.68873	8.91e-27	1.3e-25
MCM8	4	-0.93042	-10.711	0.097641	0.85292	9.04e-27	1.32e-25
FAM78B	4	-0.85243	-10.706	0.12415	0.88158	9.49e-27	1.38e-25
OR52W1	4	0.80048	10.706	0.019817	0.70567	9.51e-27	1.38e-25
KIAA1109	4	-0.89106	-10.703	0.11033	0.86634	9.86e-27	1.43e-25
SRSF3	4	-0.95316	-10.701	0.090902	0.84894	1.01e-26	1.46e-25
OR6P1	4	-1.0214	-10.701	0.073785	0.82789	1.01e-26	1.46e-25
YME1L1	4	-0.91917	-10.699	0.10098	0.85398	1.03e-26	1.49e-25
GOLGA8J	4	-0.93925	-10.698	0.095171	0.85009	1.04e-26	1.5e-25
CRIP3	4	-1.1478	-10.697	0.050243	0.80694	1.05e-26	1.52e-25
KIF13A	4	-0.88754	-10.697	0.11163	0.86867	1.05e-26	1.53e-25
C7orf55	4	-0.91275	-10.696	0.10313	0.85573	1.06e-26	1.54e-25
AATK	4	0.79662	10.694	0.020403	0.70758	1.09e-26	1.58e-25
FAM207A	4	-0.90782	-10.693	0.10496	0.8589	1.09e-26	1.58e-25
SLC38A4	4	-1.0008	-10.692	0.078431	0.83315	1.11e-26	1.6e-25
C16orf72	4	-0.96073	-10.69	0.088914	0.84716	1.13e-26	1.63e-25
AAK1	4	-1.136	-10.686	0.052158	0.80694	1.18e-26	1.7e-25
ARF4	4	0.84174	10.685	0.014617	0.6848	1.2e-26	1.72e-25
SMAD9	4	0.80641	10.685	0.019001	0.7025	1.2e-26	1.72e-25
S1PR5	4	0.79601	10.684	0.020497	0.70758	1.21e-26	1.74e-25
ARHGEF28	4	-0.90663	-10.679	0.10539	0.85928	1.28e-26	1.84e-25
GJC1	4	-0.90047	-10.677	0.10734	0.86099	1.3e-26	1.87e-25
POLE2	4	0.81038	10.677	0.018415	0.7025	1.31e-26	1.87e-25
ATL1	4	0.83979	10.676	0.014857	0.68873	1.32e-26	1.9e-25
TIGD6	4	-0.93864	-10.674	0.095318	0.85009	1.35e-26	1.94e-25
CUTA	4	-0.93115	-10.672	0.097327	0.85292	1.38e-26	1.97e-25
TSPAN14	4	-0.94298	-10.668	0.094041	0.84894	1.44e-26	2.05e-25
NOL11	4	-0.94247	-10.668	0.094156	0.84894	1.44e-26	2.05e-25
CLLU1	4	0.84843	10.667	0.013947	0.6812	1.46e-26	2.08e-25
PMP2	4	0.82824	10.666	0.016103	0.69644	1.46e-26	2.08e-25
ANKHD1	4	-0.90945	-10.666	0.10437	0.8577	1.47e-26	2.09e-25
SPATS2	4	-0.87028	-10.663	0.11733	0.8727	1.52e-26	2.17e-25
D2HGDH	4	-0.83151	-10.66	0.13256	0.89561	1.57e-26	2.24e-25
NETO2	4	-1.0284	-10.659	0.072069	0.82789	1.58e-26	2.24e-25
LOC113230	4	-0.96304	-10.658	0.088318	0.84689	1.59e-26	2.26e-25
SLC37A2	4	0.8334	10.657	0.015538	0.69333	1.61e-26	2.29e-25
RBM14-RBM4	4	-0.91328	-10.648	0.10298	0.85573	1.77e-26	2.52e-25
SUSD1	4	-0.93272	-10.647	0.096898	0.85209	1.79e-26	2.54e-25
WIZ	4	-0.90415	-10.645	0.10609	0.86005	1.83e-26	2.6e-25
OR10P1	4	-0.86565	-10.642	0.11907	0.8727	1.9e-26	2.69e-25
YIPF5	4	-0.88959	-10.641	0.11091	0.8685	1.91e-26	2.71e-25
ZNF22	4	-1.052	-10.641	0.067057	0.81677	1.93e-26	2.73e-25
FLI1	4	-0.97331	-10.638	0.085409	0.84495	1.98e-26	2.79e-25
CDK20	4	-0.9143	-10.637	0.10263	0.85573	2e-26	2.82e-25
TDG	4	0.87104	10.629	0.011624	0.66131	2.19e-26	3.09e-25
PDE4C	4	0.82489	10.625	0.01672	0.70109	2.28e-26	3.21e-25
TCN2	4	-0.99716	-10.625	0.079194	0.83315	2.29e-26	3.22e-25
CEACAM16	4	-0.85591	-10.623	0.12279	0.88006	2.32e-26	3.27e-25
RAB4A	4	0.80591	10.62	0.019032	0.7025	2.41e-26	3.39e-25
CD300LF	4	-0.91859	-10.617	0.10115	0.85398	2.49e-26	3.5e-25
NAGPA	4	-0.88271	-10.617	0.11318	0.86867	2.49e-26	3.5e-25
GPHA2	4	-0.98949	-10.614	0.08113	0.83595	2.56e-26	3.59e-25
CNTN4	4	0.83103	10.606	0.015768	0.69333	2.79e-26	3.92e-25
DNASE1L3	4	0.81888	10.604	0.017452	0.70232	2.86e-26	4e-25
CADM4	4	-0.81972	-10.603	0.13745	0.89829	2.88e-26	4.03e-25
ING3	4	-1.2487	-10.603	0.036756	0.77065	2.89e-26	4.04e-25
GJB2	4	-0.91196	-10.597	0.10343	0.85573	3.09e-26	4.32e-25
AFF4	4	-0.9149	-10.595	0.10243	0.85573	3.13e-26	4.37e-25
NEMF	4	0.83599	10.594	0.015339	0.69333	3.18e-26	4.45e-25
PAXIP1	4	-0.94264	-10.589	0.094125	0.84894	3.36e-26	4.69e-25
MYH7	4	-0.94933	-10.588	0.092148	0.84894	3.37e-26	4.7e-25
ARF6	4	-0.92334	-10.586	0.099545	0.85322	3.45e-26	4.81e-25
TLN2	4	-0.99923	-10.584	0.078776	0.83315	3.52e-26	4.9e-25
PIGV	4	-0.84746	-10.578	0.12598	0.88505	3.77e-26	5.25e-25
FAM25G	4	-0.81245	-10.577	0.14046	0.90185	3.8e-26	5.28e-25
CARD18	4	-0.97785	-10.573	0.084279	0.84204	3.99e-26	5.54e-25
VAMP1	4	0.80863	10.569	0.018697	0.7025	4.14e-26	5.75e-25
ZBTB17	4	-0.87907	-10.567	0.11438	0.86867	4.24e-26	5.89e-25
SLC35F4	4	-1.0403	-10.561	0.069464	0.82291	4.51e-26	6.25e-25
ANKRD52	4	-0.93045	-10.559	0.097641	0.85292	4.6e-26	6.37e-25
SLCO1A2	4	-0.99117	-10.553	0.08068	0.83543	4.94e-26	6.84e-25
MMS22L	4	-1.1056	-10.544	0.056835	0.8093	5.43e-26	7.51e-25
DGCR14	4	-0.83892	-10.542	0.12932	0.89267	5.54e-26	7.66e-25
RUNX2	4	-0.89413	-10.542	0.10929	0.86402	5.54e-26	7.66e-25
EPB41L4B	4	0.82004	10.536	0.017316	0.70232	5.87e-26	8.11e-25
CD274	4	0.79094	10.535	0.021365	0.71469	5.93e-26	8.18e-25
DDHD1	4	0.82076	10.531	0.017191	0.70232	6.24e-26	8.6e-25
SALL2	4	0.85775	10.528	0.012995	0.67769	6.39e-26	8.8e-25
TMEM192	4	-0.89004	-10.527	0.11066	0.86724	6.47e-26	8.9e-25
SKAP2	4	-0.91965	-10.526	0.10077	0.85381	6.57e-26	9.04e-25
ZNF776	4	-0.92623	-10.524	0.098781	0.85322	6.7e-26	9.21e-25
MFSD1	4	-1.0644	-10.524	0.064306	0.81407	6.72e-26	9.22e-25
RAPGEF1	4	-0.82177	-10.51	0.13658	0.8977	7.76e-26	1.06e-24
NCAPH	4	-0.86732	-10.51	0.11843	0.8727	7.77e-26	1.07e-24
C5orf46	4	-0.82356	-10.507	0.13576	0.8977	8.04e-26	1.1e-24
DNAJB3	4	-0.97702	-10.505	0.08452	0.84204	8.2e-26	1.12e-24
ENTPD4	4	-0.97915	-10.503	0.083892	0.84204	8.36e-26	1.14e-24
CDH15	4	-0.98649	-10.503	0.081998	0.84043	8.39e-26	1.15e-24
OAZ3	4	-0.86305	-10.502	0.12006	0.8747	8.49e-26	1.16e-24
ROBO1	4	0.79331	10.498	0.020895	0.70941	8.79e-26	1.2e-24
CHID1	4	0.82465	10.495	0.016762	0.70109	9.06e-26	1.24e-24
FADD	4	-0.8721	-10.495	0.11677	0.8727	9.15e-26	1.25e-24
RRP8	4	0.8142	10.494	0.018017	0.7025	9.22e-26	1.26e-24
MYH8	4	0.81999	10.494	0.017327	0.70232	9.23e-26	1.26e-24
HMSD	4	-1.0275	-10.493	0.072289	0.82789	9.29e-26	1.26e-24
ZSCAN10	4	-0.8181	-10.491	0.13796	0.89884	9.47e-26	1.29e-24
DDX55	4	-0.86625	-10.489	0.11882	0.8727	9.72e-26	1.32e-24
RPTN	4	-0.95037	-10.486	0.091802	0.84894	9.98e-26	1.36e-24
HIST1H3I	4	-0.93178	-10.485	0.097107	0.85225	1.01e-25	1.37e-24
RNF138	4	-1.0202	-10.483	0.073994	0.82789	1.03e-25	1.4e-24
POTEI	4	-0.80511	-10.483	0.14343	0.90464	1.04e-25	1.41e-24
PPP1R3B	4	-0.87789	-10.481	0.11475	0.86867	1.05e-25	1.43e-24
RNF157	4	-0.94266	-10.478	0.094125	0.84894	1.09e-25	1.47e-24
TMEM200C	4	-0.87533	-10.477	0.11556	0.87026	1.1e-25	1.49e-24
AGBL2	4	-0.9052	-10.475	0.10576	0.85947	1.13e-25	1.52e-24
KRTAP9-4	4	-0.85583	-10.473	0.12283	0.88006	1.15e-25	1.55e-24
GGT1	4	-0.88695	-10.472	0.11188	0.86867	1.17e-25	1.57e-24
DEFB127	4	0.81354	10.471	0.018059	0.7025	1.17e-25	1.57e-24
ASCC1	4	-0.93929	-10.469	0.095161	0.85009	1.2e-25	1.62e-24
ABI2	4	-1.0362	-10.467	0.070343	0.82475	1.22e-25	1.64e-24
ISCA1	4	-0.89859	-10.465	0.10787	0.86168	1.25e-25	1.68e-24
MRPS28	4	0.78109	10.457	0.023071	0.71674	1.36e-25	1.83e-24
RABGGTA	4	-0.91953	-10.456	0.10082	0.85388	1.37e-25	1.85e-24
CPD	4	-0.94007	-10.454	0.09492	0.85009	1.41e-25	1.89e-24
SLC30A1	4	0.85289	10.45	0.013445	0.67769	1.46e-25	1.96e-24
SMN2	4	-0.88486	-10.448	0.11254	0.86867	1.49e-25	2e-24
C19orf66	4	0.82264	10.447	0.017023	0.70232	1.51e-25	2.02e-24
RPGRIP1L	4	-1.1181	-10.445	0.054753	0.80902	1.55e-25	2.07e-24
TRIOBP	4	0.77543	10.443	0.023939	0.71674	1.57e-25	2.1e-24
NREP	4	-0.84157	-10.439	0.12818	0.88904	1.64e-25	2.2e-24
PCSK7	4	-0.86952	-10.438	0.11762	0.8727	1.67e-25	2.23e-24
TTC33	4	-0.88424	-10.436	0.11274	0.86867	1.71e-25	2.28e-24
HOXD4	4	-0.87889	-10.429	0.11442	0.86867	1.82e-25	2.43e-24
ADCYAP1	4	-0.92352	-10.426	0.099482	0.85322	1.88e-25	2.5e-24
PIP4K2B	4	0.77606	10.426	0.023887	0.71674	1.89e-25	2.52e-24
FGF22	4	-0.95792	-10.425	0.089595	0.84716	1.9e-25	2.53e-24
ARHGAP11A	4	-1.0541	-10.425	0.066618	0.81677	1.9e-25	2.53e-24
YAP1	4	-0.92727	-10.422	0.098488	0.85292	1.97e-25	2.62e-24
EIF2B1	4	-0.85871	-10.422	0.12181	0.87934	1.97e-25	2.62e-24
PQLC3	4	-1.0218	-10.418	0.073722	0.82789	2.06e-25	2.73e-24
ZBTB41	4	-0.97043	-10.416	0.08632	0.84495	2.09e-25	2.78e-24
ZNF385D	4	0.80009	10.413	0.019827	0.70567	2.15e-25	2.86e-24
MRAP2	4	0.78811	10.413	0.021836	0.71674	2.16e-25	2.87e-24
NFX1	4	0.82629	10.41	0.016396	0.69644	2.24e-25	2.97e-24
BLMH	4	-0.86436	-10.409	0.11957	0.87319	2.25e-25	2.97e-24
GPR61	4	0.79231	10.409	0.021072	0.71252	2.25e-25	2.97e-24
EPT1	4	0.80612	10.408	0.019001	0.7025	2.28e-25	3.01e-24
CRB3	4	0.80968	10.407	0.01853	0.7025	2.31e-25	3.05e-24
OBSL1	4	-0.86592	-10.404	0.11892	0.8727	2.39e-25	3.15e-24
PIAS3	4	-0.92699	-10.402	0.098551	0.85292	2.42e-25	3.19e-24
CALN1	4	-0.83374	-10.401	0.13165	0.89561	2.44e-25	3.22e-24
GABPA	4	0.8171	10.397	0.017682	0.7025	2.56e-25	3.38e-24
HCCS	4	-0.81983	-10.394	0.13741	0.89829	2.65e-25	3.49e-24
GTF2B	4	-0.91797	-10.393	0.10145	0.85416	2.67e-25	3.51e-24
DCAF8L1	4	0.84201	10.392	0.014596	0.6848	2.69e-25	3.53e-24
GCSAM	4	-0.82271	-10.39	0.13611	0.8977	2.74e-25	3.6e-24
RRP15	4	-0.88971	-10.387	0.11082	0.8682	2.84e-25	3.73e-24
NFATC4	4	-0.83304	-10.387	0.13187	0.89561	2.85e-25	3.74e-24
PRKCSH	4	0.82401	10.385	0.016866	0.70232	2.89e-25	3.79e-24
F10	4	-1.0098	-10.381	0.076327	0.83132	3.01e-25	3.95e-24
GRASP	4	-0.85329	-10.38	0.12392	0.88158	3.07e-25	4.02e-24
CFP	4	-0.93842	-10.377	0.095349	0.85009	3.14e-25	4.11e-24
ZMYND8	4	-0.96881	-10.376	0.086738	0.84495	3.19e-25	4.16e-24
ZNF223	4	0.92665	10.375	0.0075334	0.64202	3.21e-25	4.19e-24
NEDD9	4	-0.88262	-10.375	0.11322	0.86867	3.24e-25	4.22e-24
SQSTM1	4	0.7826	10.373	0.022757	0.71674	3.28e-25	4.27e-24
DNPEP	4	-1.0815	-10.373	0.06124	0.81407	3.28e-25	4.27e-24
DNAL4	4	0.85429	10.373	0.013319	0.67769	3.3e-25	4.3e-24
RANBP9	4	0.89772	10.368	0.0095109	0.65201	3.47e-25	4.52e-24
YPEL4	4	-0.81725	-10.367	0.1383	0.89932	3.5e-25	4.55e-24
TRMT2B	4	-0.97751	-10.365	0.084321	0.84204	3.57e-25	4.65e-24
JUND	4	0.76721	10.363	0.025519	0.72168	3.67e-25	4.77e-24
GHR	4	0.78029	10.355	0.023217	0.71674	3.96e-25	5.14e-24
GSG1	4	-0.90513	-10.352	0.10578	0.85947	4.11e-25	5.33e-24
PCDHGB5	4	-0.94379	-10.348	0.093926	0.84894	4.28e-25	5.55e-24
CXorf58	4	-0.94132	-10.347	0.094512	0.84976	4.3e-25	5.57e-24
PICALM	4	-0.96534	-10.344	0.087669	0.84512	4.45e-25	5.76e-24
MEI1	4	-0.87021	-10.342	0.11737	0.8727	4.57e-25	5.91e-24
C10orf53	4	-0.80345	-10.339	0.14422	0.90464	4.67e-25	6.04e-24
CEP120	4	-0.87517	-10.335	0.1156	0.87026	4.91e-25	6.34e-24
ACP5	4	-0.82528	-10.333	0.13514	0.89608	5e-25	6.46e-24
TMPPE	4	-0.87055	-10.333	0.11729	0.8727	5.01e-25	6.46e-24
FOXRED2	4	0.81097	10.33	0.018373	0.7025	5.16e-25	6.66e-24
FZD9	4	-0.93139	-10.327	0.097253	0.85292	5.34e-25	6.88e-24
SGCB	4	0.79491	10.325	0.020633	0.7088	5.42e-25	6.98e-24
FIBP	4	-0.86513	-10.324	0.11928	0.87319	5.48e-25	7.05e-24
PTX3	4	-0.87434	-10.323	0.11592	0.87196	5.56e-25	7.14e-24
ZNF185	4	-0.90306	-10.322	0.10653	0.86045	5.63e-25	7.23e-24
ARF1	4	-0.88454	-10.318	0.11269	0.86867	5.83e-25	7.48e-24
NRIP3	4	0.7834	10.318	0.022663	0.71674	5.84e-25	7.49e-24
C1orf52	4	-0.85237	-10.317	0.12415	0.88158	5.89e-25	7.55e-24
PCDHB10	4	0.76458	10.312	0.026001	0.72168	6.22e-25	7.97e-24
ATOH7	4	-0.79645	-10.309	0.14745	0.90464	6.44e-25	8.25e-24
SCN8A	4	-0.94414	-10.3	0.093853	0.84894	7.05e-25	9.02e-24
MPDZ	4	0.78185	10.299	0.022893	0.71674	7.14e-25	9.12e-24
EDRF1	4	0.78059	10.296	0.023176	0.71674	7.36e-25	9.4e-24
TM9SF3	4	-0.82334	-10.294	0.13583	0.8977	7.53e-25	9.61e-24
TNFSF10	4	0.81265	10.293	0.018143	0.7025	7.54e-25	9.62e-24
NPAS4	4	-1.1606	-10.293	0.048119	0.8	7.61e-25	9.71e-24
DCSTAMP	4	-0.92026	-10.292	0.1005	0.85346	7.69e-25	9.8e-24
TCHP	4	0.79007	10.285	0.021491	0.71548	8.24e-25	1.05e-23
GCM2	4	0.78442	10.272	0.022558	0.71674	9.38e-25	1.19e-23
SEMA4F	4	0.78123	10.27	0.023039	0.71674	9.6e-25	1.22e-23
C20orf202	4	-0.97791	-10.265	0.084238	0.84204	1.01e-24	1.28e-23
TFDP1	4	-1.0704	-10.264	0.063113	0.81407	1.03e-24	1.3e-23
RNF130	4	0.83846	10.257	0.014993	0.68873	1.1e-24	1.4e-23
SYNGR2	4	-0.8808	-10.255	0.11382	0.86867	1.12e-24	1.42e-23
HOXB3	4	-0.80514	-10.251	0.14341	0.90464	1.17e-24	1.49e-23
LOC286238	4	-0.94395	-10.242	0.093895	0.84894	1.28e-24	1.62e-23
SERF1A	4	-0.85895	-10.242	0.12171	0.87934	1.28e-24	1.63e-23
MKL1	4	-0.81649	-10.241	0.13868	0.89942	1.3e-24	1.65e-23
RNF180	4	-0.83331	-10.241	0.13177	0.89561	1.3e-24	1.65e-23
ENAM	4	0.77938	10.24	0.023385	0.71674	1.31e-24	1.66e-23
DSCC1	4	-0.94339	-10.239	0.093968	0.84894	1.32e-24	1.67e-23
STAMBPL1	4	-0.96266	-10.239	0.088433	0.84689	1.33e-24	1.67e-23
CLEC4M	4	0.80733	10.232	0.018844	0.7025	1.43e-24	1.8e-23
KIAA1683	4	-0.8786	-10.226	0.11447	0.86867	1.52e-24	1.91e-23
AK8	4	-0.93614	-10.221	0.095862	0.85209	1.6e-24	2.02e-23
ABHD12B	4	-0.90234	-10.22	0.10682	0.86045	1.61e-24	2.02e-23
B3GAT2	4	-1.0359	-10.219	0.070374	0.82475	1.63e-24	2.04e-23
C1QB	4	0.7993	10.218	0.020016	0.70567	1.65e-24	2.07e-23
ARSF	4	-0.78396	-10.217	0.15346	0.90683	1.66e-24	2.08e-23
MYO9A	4	-0.82576	-10.215	0.13493	0.89601	1.69e-24	2.13e-23
SEC22A	4	-0.88215	-10.213	0.11329	0.86867	1.73e-24	2.17e-23
GMPS	4	0.82104	10.21	0.01718	0.70232	1.79e-24	2.25e-23
MROH2A	4	-0.85308	-10.2	0.12397	0.88158	1.98e-24	2.47e-23
NT5C2	4	-0.86574	-10.2	0.11904	0.8727	1.99e-24	2.49e-23
RAB10	4	-0.91987	-10.192	0.10065	0.85359	2.15e-24	2.69e-23
CYP3A7-CYP3A51P	4	-0.86621	-10.189	0.11884	0.8727	2.22e-24	2.78e-23
FOXI1	4	-0.8536	-10.186	0.12377	0.88158	2.29e-24	2.87e-23
ZNF563	4	-0.98616	-10.177	0.082093	0.84047	2.51e-24	3.14e-23
CFAP45	4	-0.83324	-10.177	0.13177	0.89561	2.52e-24	3.14e-23
ANKRD31	4	-1.0683	-10.173	0.063489	0.81407	2.61e-24	3.26e-23
ZNF646	4	-0.85853	-10.173	0.12191	0.87934	2.61e-24	3.26e-23
OR4D2	4	0.7687	10.17	0.025153	0.72168	2.71e-24	3.37e-23
PARP15	4	-1.0991	-10.169	0.057892	0.81009	2.72e-24	3.38e-23
FRMPD2	4	-0.94888	-10.168	0.092346	0.84894	2.75e-24	3.42e-23
CSTF3	4	-0.92349	-10.167	0.099482	0.85322	2.77e-24	3.45e-23
SAA1	4	-0.96429	-10.165	0.08791	0.8457	2.83e-24	3.52e-23
IL12RB1	4	0.75835	10.164	0.027497	0.73203	2.86e-24	3.55e-23
DAGLB	4	-0.82288	-10.162	0.13607	0.8977	2.94e-24	3.65e-23
TMEM136	4	0.76755	10.161	0.025404	0.72168	2.95e-24	3.66e-23
PTGER4	4	0.82447	10.161	0.016762	0.70109	2.96e-24	3.66e-23
ZNF496	4	0.79728	10.151	0.020392	0.70758	3.27e-24	4.05e-23
TINF2	4	-0.86742	-10.149	0.1184	0.8727	3.36e-24	4.15e-23
ADAM19	4	-0.88666	-10.148	0.11195	0.86867	3.38e-24	4.18e-23
ABTB1	4	-0.90618	-10.147	0.10548	0.85928	3.43e-24	4.23e-23
CX3CR1	4	-0.87887	-10.146	0.11442	0.86867	3.47e-24	4.28e-23
SPPL3	4	0.81288	10.145	0.018143	0.7025	3.48e-24	4.3e-23
WFDC10A	4	-0.85506	-10.145	0.12313	0.881	3.49e-24	4.3e-23
NUDT14	4	-0.92735	-10.144	0.098436	0.85292	3.53e-24	4.35e-23
TMCO6	4	-0.89113	-10.143	0.11032	0.86634	3.57e-24	4.39e-23
C4orf33	4	-1.0604	-10.143	0.065258	0.81476	3.57e-24	4.39e-23
TMEM120A	4	-0.89525	-10.141	0.10897	0.86324	3.63e-24	4.46e-23
DGKG	4	0.79606	10.139	0.020476	0.70758	3.7e-24	4.55e-23
ALMS1	4	0.81096	10.139	0.018373	0.7025	3.72e-24	4.57e-23
LOC101060321	4	-0.9277	-10.137	0.098425	0.85292	3.79e-24	4.65e-23
QTRTD1	4	-0.92431	-10.136	0.099315	0.85322	3.83e-24	4.7e-23
AFTPH	4	-0.88638	-10.134	0.11197	0.86867	3.9e-24	4.78e-23
FAM120B	4	0.81309	10.131	0.018111	0.7025	4.04e-24	4.95e-23
ZAR1L	4	-0.84904	-10.127	0.12533	0.88505	4.18e-24	5.12e-23
OVOL1	4	-0.80432	-10.124	0.14382	0.90464	4.31e-24	5.28e-23
UBXN2B	4	-0.96884	-10.124	0.086738	0.84495	4.34e-24	5.31e-23
LOXHD1	4	-0.88767	-10.123	0.11158	0.86867	4.36e-24	5.33e-23
LIN37	4	-0.77935	-10.117	0.15553	0.90916	4.66e-24	5.69e-23
TTC37	4	0.86628	10.109	0.012022	0.6691	5.02e-24	6.12e-23
CAGE1	4	-0.92226	-10.106	0.09989	0.85346	5.2e-24	6.34e-23
C10orf90	4	-1.0655	-10.104	0.064065	0.81407	5.31e-24	6.47e-23
SPATA6	4	0.77121	10.1	0.024609	0.7208	5.54e-24	6.75e-23
FBXL5	4	-0.91199	-10.099	0.10343	0.85573	5.56e-24	6.77e-23
C12orf60	4	-0.92051	-10.099	0.10042	0.85346	5.59e-24	6.8e-23
TP53	4	0.79886	10.094	0.020058	0.70567	5.88e-24	7.15e-23
ATXN1	4	-0.83003	-10.091	0.13317	0.89561	6.06e-24	7.36e-23
BCL2L2-PABPN1	4	-0.82818	-10.086	0.13385	0.89561	6.34e-24	7.7e-23
C11orf63	4	-0.90228	-10.085	0.10684	0.86045	6.42e-24	7.79e-23
SLC31A2	4	-0.93364	-10.085	0.096678	0.85209	6.43e-24	7.79e-23
MRGPRX3	4	-0.83364	-10.085	0.13169	0.89561	6.46e-24	7.83e-23
ABCA9	4	-1.0027	-10.084	0.07797	0.83192	6.5e-24	7.87e-23
ZWINT	4	-0.83196	-10.074	0.13244	0.89561	7.23e-24	8.76e-23
IQCF5	4	-0.79635	-10.073	0.14752	0.90464	7.24e-24	8.76e-23
LYPLA2	4	-0.85588	-10.073	0.1228	0.88006	7.27e-24	8.79e-23
PCNXL3	4	-0.80421	-10.07	0.14387	0.90464	7.54e-24	9.11e-23
RPN1	4	-0.91652	-10.069	0.10191	0.85529	7.61e-24	9.19e-23
MAP1B	4	0.77914	10.067	0.023458	0.71674	7.7e-24	9.29e-23
HIF1A	4	-0.83325	-10.065	0.13177	0.89561	7.86e-24	9.48e-23
MAGEA10	4	0.73492	10.064	0.032676	0.75981	8e-24	9.64e-23
ZNF14	4	0.83474	10.062	0.015464	0.69333	8.1e-24	9.76e-23
TMX2	4	-0.87061	-10.059	0.11728	0.8727	8.37e-24	1.01e-22
C1orf56	4	-0.90091	-10.054	0.10722	0.86045	8.79e-24	1.06e-22
ALDH7A1	4	-0.89164	-10.052	0.11023	0.86634	8.99e-24	1.08e-22
MCM10	4	-0.91539	-10.052	0.10231	0.85573	8.99e-24	1.08e-22
LMCD1	4	-0.84473	-10.051	0.12715	0.88701	9.09e-24	1.09e-22
ARPC4-TTLL3	4	0.82035	10.05	0.017264	0.70232	9.15e-24	1.1e-22
DDX51	4	-0.83249	-10.05	0.13214	0.89561	9.22e-24	1.11e-22
USHBP1	4	0.76301	10.046	0.026346	0.72414	9.59e-24	1.15e-22
SLC39A9	4	-0.84752	-10.045	0.12598	0.88505	9.63e-24	1.15e-22
NUB1	4	0.88039	10.043	0.010934	0.65201	9.86e-24	1.18e-22
SUPT4H1	4	-1.0502	-10.038	0.067403	0.81751	1.04e-23	1.25e-22
INSM2	4	-0.84041	-10.034	0.12873	0.89095	1.08e-23	1.29e-22
ALLC	4	-0.8515	-10.032	0.12453	0.88327	1.1e-23	1.32e-22
DERL1	4	-0.92602	-10.027	0.098854	0.85322	1.16e-23	1.38e-22
NELL2	4	0.82516	10.025	0.016647	0.70109	1.18e-23	1.41e-22
RSPH6A	4	-0.89626	-10.018	0.10872	0.86318	1.27e-23	1.52e-22
ZNF780A	4	-0.8696	-10.018	0.11759	0.8727	1.27e-23	1.52e-22
ADAM30	4	0.82219	10.018	0.017086	0.70232	1.27e-23	1.52e-22
FAM181B	4	-0.84814	-10.015	0.12567	0.88505	1.31e-23	1.56e-22
CYGB	4	-0.92012	-10.014	0.10054	0.85346	1.32e-23	1.57e-22
ACSBG1	4	0.75993	10.013	0.027162	0.73203	1.33e-23	1.59e-22
VPS72	4	-0.91868	-10.013	0.1011	0.85398	1.34e-23	1.6e-22
LGALS7	4	-0.91309	-10.011	0.10303	0.85573	1.36e-23	1.62e-22
RCOR3	4	0.77236	10.01	0.024421	0.72074	1.38e-23	1.64e-22
DSG3	4	-0.92163	-10.008	0.10009	0.85346	1.4e-23	1.66e-22
TIGD5	4	-0.95333	-10.005	0.090861	0.84894	1.46e-23	1.73e-22
JUNB	4	0.7732	10.004	0.024264	0.72062	1.47e-23	1.74e-22
SRR	4	-0.91641	-10.003	0.10197	0.85529	1.47e-23	1.74e-22
ZNF317	4	0.7648	10.003	0.025917	0.72168	1.48e-23	1.75e-22
MRPL40	4	-0.82756	-9.9987	0.13409	0.89561	1.54e-23	1.82e-22
KIF2C	4	-0.85002	-9.9981	0.12495	0.88471	1.55e-23	1.84e-22
WFDC12	4	-0.78651	-9.9929	0.15249	0.90683	1.64e-23	1.93e-22
PGAM4	4	-0.82657	-9.992	0.13456	0.89561	1.65e-23	1.95e-22
RAE1	4	-1.1434	-9.9859	0.050913	0.80694	1.76e-23	2.07e-22
CYP11B1	4	-0.8223	-9.9854	0.13636	0.8977	1.77e-23	2.08e-22
HECTD1	4	-0.99312	-9.9844	0.08022	0.83457	1.78e-23	2.1e-22
ZNF234	4	-0.99775	-9.9839	0.079048	0.83315	1.79e-23	2.11e-22
CENPQ	4	0.77757	9.9804	0.023657	0.71674	1.86e-23	2.18e-22
NSMCE2	4	-0.9804	-9.9803	0.083641	0.84204	1.86e-23	2.19e-22
KIF4A	4	-0.86142	-9.9799	0.12076	0.87639	1.87e-23	2.19e-22
TMEM220	4	-0.91227	-9.9798	0.10332	0.85573	1.87e-23	2.19e-22
MUC12	4	-0.84918	-9.9779	0.12528	0.88505	1.9e-23	2.23e-22
PHF13	4	-0.86156	-9.9764	0.12067	0.87637	1.93e-23	2.27e-22
SPATA31A6	4	-0.83668	-9.9761	0.13029	0.89454	1.94e-23	2.27e-22
SFTA3	4	0.77093	9.9761	0.024661	0.7208	1.94e-23	2.27e-22
HADHA	4	-0.82856	-9.9696	0.1337	0.89561	2.07e-23	2.42e-22
PGK2	4	-0.92546	-9.9685	0.099022	0.85322	2.09e-23	2.45e-22
TTC25	4	0.78406	9.9647	0.022611	0.71674	2.18e-23	2.54e-22
FOXG1	4	-0.81665	-9.9594	0.13863	0.89942	2.3e-23	2.68e-22
NFATC2	4	-0.8719	-9.9589	0.11692	0.8727	2.31e-23	2.69e-22
AFM	4	-0.88034	-9.9579	0.11404	0.86867	2.33e-23	2.72e-22
TP53BP1	4	-0.94241	-9.9578	0.094198	0.84894	2.33e-23	2.72e-22
KIAA1024L	4	-0.90796	-9.957	0.10491	0.85884	2.35e-23	2.74e-22
SLC39A4	4	-0.80943	-9.9561	0.14162	0.9029	2.37e-23	2.76e-22
KLRF1	4	-0.87673	-9.9537	0.1151	0.86867	2.43e-23	2.83e-22
SOCS6	4	-0.94747	-9.9512	0.092629	0.84894	2.49e-23	2.9e-22
ZC3H4	4	-0.83708	-9.9475	0.13013	0.89407	2.59e-23	3.01e-22
HOXB8	4	-0.92068	-9.9374	0.10037	0.85346	2.86e-23	3.33e-22
FAM114A2	4	-0.814	-9.9363	0.13978	0.90044	2.89e-23	3.36e-22
OR51L1	4	-1.1026	-9.9363	0.057264	0.8093	2.89e-23	3.36e-22
USP24	4	0.89888	9.9287	0.0094272	0.65201	3.12e-23	3.62e-22
TNFRSF10D	4	-0.84874	-9.9285	0.12545	0.88505	3.13e-23	3.63e-22
PLEKHA3	4	0.82812	9.9278	0.016123	0.69644	3.15e-23	3.65e-22
PRLH	4	-0.85938	-9.9253	0.12153	0.87893	3.23e-23	3.74e-22
SLMO2	4	-0.95181	-9.924	0.09129	0.84894	3.27e-23	3.79e-22
FCHO1	4	0.76937	9.922	0.025017	0.72168	3.34e-23	3.86e-22
HIST2H2AA3	4	-0.8062	-9.9152	0.14293	0.90464	3.58e-23	4.13e-22
ZNF605	4	-0.82694	-9.9142	0.13441	0.89561	3.61e-23	4.17e-22
HCAR3	4	-0.81169	-9.9088	0.14077	0.90235	3.81e-23	4.4e-22
HSP90AB1	4	-0.88459	-9.9059	0.11267	0.86867	3.93e-23	4.53e-22
PLAG1	4	-0.88329	-9.9031	0.11299	0.86867	4.04e-23	4.65e-22
MEPE	4	-0.96822	-9.8946	0.086864	0.84495	4.39e-23	5.06e-22
OR5R1	4	-0.84057	-9.8944	0.12866	0.89095	4.4e-23	5.07e-22
INSL5	4	-0.90299	-9.8917	0.10657	0.86045	4.52e-23	5.21e-22
ELOVL7	4	-0.95137	-9.8915	0.091478	0.84894	4.53e-23	5.21e-22
USP48	4	-0.80566	-9.8914	0.14318	0.90464	4.54e-23	5.21e-22
CRYBA4	4	-0.86934	-9.883	0.11769	0.8727	4.93e-23	5.66e-22
DNAJC21	4	-0.89593	-9.8783	0.10882	0.86318	5.17e-23	5.94e-22
AMDHD1	4	-0.79486	-9.8782	0.14828	0.90464	5.18e-23	5.94e-22
SYS1	4	-0.82296	-9.8773	0.13602	0.8977	5.22e-23	5.99e-22
MASTL	4	-0.93245	-9.8768	0.096981	0.85209	5.25e-23	6.01e-22
USP9X	4	-0.94628	-9.8757	0.0931	0.84894	5.31e-23	6.08e-22
GPA33	4	-0.86709	-9.8754	0.11852	0.8727	5.32e-23	6.09e-22
KRT28	4	0.76411	9.8751	0.026095	0.72168	5.34e-23	6.1e-22
PSMD1	4	-0.85153	-9.8708	0.12453	0.88327	5.57e-23	6.37e-22
SULT1A1	4	0.7442	9.8639	0.030332	0.75538	5.97e-23	6.82e-22
FGF2	4	0.86411	9.8632	0.012221	0.6691	6.01e-23	6.87e-22
SWSAP1	4	0.73972	9.8607	0.031378	0.75732	6.16e-23	7.03e-22
RASSF5	4	-0.83158	-9.8584	0.13255	0.89561	6.3e-23	7.19e-22
DCAF10	4	0.79364	9.8572	0.020832	0.70941	6.38e-23	7.28e-22
ISCU	4	-0.79283	-9.8555	0.14952	0.90549	6.49e-23	7.39e-22
CCDC59	4	-0.87519	-9.8549	0.1156	0.87026	6.53e-23	7.43e-22
ZNF626	4	0.80804	9.8526	0.01875	0.7025	6.68e-23	7.6e-22
CEP192	4	-0.86447	-9.8417	0.11952	0.87319	7.44e-23	8.46e-22
EXOSC3	4	0.76197	9.841	0.026754	0.73162	7.49e-23	8.51e-22
TBL3	4	-0.84183	-9.841	0.1281	0.88878	7.49e-23	8.51e-22
TAF13	4	0.75384	9.8353	0.028491	0.74073	7.93e-23	9e-22
OR2W5	4	-0.7994	-9.8312	0.14617	0.90464	8.26e-23	9.37e-22
C11orf30	4	-0.92097	-9.8311	0.10025	0.85346	8.27e-23	9.38e-22
MRPS24	4	0.7312	9.8278	0.033492	0.75981	8.54e-23	9.68e-22
FAM228B	4	-3.8054	-9.8274	0.00061732	0.42143	8.58e-23	9.72e-22
OLFML1	4	-0.84297	-9.8253	0.12776	0.88775	8.76e-23	9.92e-22
CEP170	4	0.8072	9.8251	0.018875	0.7025	8.78e-23	9.93e-22
SLC9A7	4	0.73678	9.8234	0.032195	0.75981	8.93e-23	1.01e-21
CFAP36	4	0.73834	9.8164	0.031766	0.75981	9.57e-23	1.08e-21
TREML2	4	-0.89699	-9.8153	0.10844	0.86318	9.67e-23	1.09e-21
HERPUD2	4	0.80901	9.8148	0.018624	0.7025	9.72e-23	1.1e-21
APOBEC3D	4	-0.99231	-9.8147	0.080471	0.83462	9.73e-23	1.1e-21
ALDH1B1	4	0.73612	9.8137	0.032372	0.75981	9.83e-23	1.11e-21
PPIAL4A	4	0.76046	9.811	0.027057	0.73203	1.01e-22	1.14e-21
DUSP1	4	0.75452	9.8107	0.028344	0.74073	1.01e-22	1.14e-21
CSF1	4	-0.89877	-9.806	0.10782	0.86168	1.06e-22	1.19e-21
OR8I2	4	-0.82008	-9.8002	0.13731	0.89829	1.12e-22	1.26e-21
BCAS1	4	0.80081	9.7992	0.019775	0.70567	1.13e-22	1.27e-21
SERTAD4	4	-0.84804	-9.7979	0.12574	0.88505	1.15e-22	1.29e-21
MTFMT	4	-0.89023	-9.7976	0.1106	0.86724	1.15e-22	1.29e-21
ZNF585A	4	-0.90871	-9.7951	0.10464	0.8584	1.18e-22	1.33e-21
FBXL12	4	0.74879	9.7891	0.029558	0.75233	1.25e-22	1.41e-21
HPGDS	4	-0.96961	-9.7867	0.086592	0.84495	1.28e-22	1.44e-21
BPIFC	4	-0.91099	-9.7863	0.10382	0.85662	1.29e-22	1.44e-21
NRSN1	4	0.72721	9.7845	0.034266	0.76163	1.31e-22	1.47e-21
PCYT1A	4	-0.91345	-9.7842	0.10291	0.85573	1.32e-22	1.47e-21
DSG1	4	-0.96746	-9.7832	0.087104	0.84495	1.33e-22	1.49e-21
NHLH2	4	-0.80951	-9.7824	0.14159	0.9029	1.34e-22	1.5e-21
HMHA1	4	0.74761	9.7814	0.029704	0.75305	1.35e-22	1.51e-21
ARPC4	4	-0.7513	-9.7783	0.1701	0.92188	1.4e-22	1.56e-21
TERF1	4	-0.9049	-9.7767	0.10584	0.85947	1.42e-22	1.58e-21
PAPPA	4	0.76383	9.7759	0.026126	0.72168	1.43e-22	1.59e-21
ZNF43	4	0.73263	9.7754	0.033178	0.75981	1.44e-22	1.6e-21
PAX5	4	0.7838	9.7726	0.022621	0.71674	1.48e-22	1.64e-21
CYP2A7	4	-0.78927	-9.771	0.15119	0.90683	1.5e-22	1.67e-21
IMMP2L	4	-0.84824	-9.7701	0.1256	0.88505	1.51e-22	1.68e-21
ATP6V0E1	4	0.74589	9.7696	0.029987	0.755	1.52e-22	1.69e-21
LYZ	4	-0.89666	-9.7675	0.10856	0.86318	1.55e-22	1.72e-21
TMEM244	4	-0.95721	-9.7674	0.089762	0.84773	1.55e-22	1.73e-21
LUC7L3	4	0.71513	9.7659	0.037269	0.77519	1.58e-22	1.75e-21
NUDT10	4	0.7146	9.7587	0.037457	0.77638	1.69e-22	1.88e-21
NAA15	4	0.772	9.7583	0.024483	0.72074	1.7e-22	1.88e-21
CLDN23	4	-0.75284	-9.7563	0.16926	0.92094	1.73e-22	1.92e-21
OR10S1	4	-0.89383	-9.7551	0.10941	0.8643	1.75e-22	1.94e-21
WWOX	4	0.7731	9.7538	0.024285	0.72062	1.78e-22	1.96e-21
EGLN2	4	-0.8341	-9.7534	0.13148	0.89561	1.78e-22	1.97e-21
LRRC43	4	-0.94423	-9.7521	0.093811	0.84894	1.81e-22	2e-21
PTPRF	4	-0.80965	-9.752	0.14154	0.9029	1.81e-22	2e-21
U2AF2	4	-0.86565	-9.7515	0.11907	0.8727	1.82e-22	2.01e-21
ADGRE5	4	0.76326	9.742	0.026273	0.72414	2e-22	2.2e-21
ZPR1	4	-0.77641	-9.7419	0.15697	0.911	2e-22	2.2e-21
PRICKLE1	4	-0.84615	-9.7414	0.12662	0.88505	2.01e-22	2.21e-21
DYRK3	4	-0.95632	-9.7402	0.089982	0.848	2.03e-22	2.24e-21
MPRIP	4	-0.91634	-9.7395	0.10197	0.85529	2.05e-22	2.25e-21
MRPL24	4	-0.86807	-9.7391	0.11814	0.8727	2.05e-22	2.26e-21
MPG	4	0.73623	9.7384	0.032352	0.75981	2.07e-22	2.27e-21
ACTN1	4	-0.84824	-9.7383	0.1256	0.88505	2.07e-22	2.27e-21
CKMT2	4	-1.0655	-9.7372	0.064065	0.81407	2.09e-22	2.3e-21
TMEM196	4	-0.8268	-9.7354	0.13446	0.89561	2.13e-22	2.34e-21
NAB1	4	-0.88813	-9.7341	0.11141	0.86867	2.16e-22	2.36e-21
MBD3L2	4	0.75104	9.7334	0.029108	0.74584	2.17e-22	2.38e-21
NOTCH2NL	4	-0.86909	-9.7325	0.11781	0.8727	2.19e-22	2.4e-21
LAMTOR2	4	0.72154	9.7311	0.035815	0.76771	2.22e-22	2.43e-21
SUCLG2	4	-0.81356	-9.7304	0.13996	0.90044	2.24e-22	2.45e-21
SUPT16H	4	-0.81612	-9.7234	0.13885	0.89942	2.4e-22	2.62e-21
KCND3	4	-0.8438	-9.72	0.1275	0.88737	2.48e-22	2.71e-21
ZNF619	4	-1.0049	-9.7198	0.077457	0.83192	2.48e-22	2.71e-21
SLIT2	4	-0.77933	-9.7168	0.15553	0.90916	2.56e-22	2.79e-21
UPRT	4	-0.83785	-9.7159	0.12979	0.89335	2.58e-22	2.82e-21
CTBS	4	0.79595	9.7111	0.020507	0.70758	2.7e-22	2.95e-21
FAM89B	4	-0.81342	-9.711	0.14002	0.90044	2.71e-22	2.95e-21
POGZ	4	-0.84384	-9.7097	0.12745	0.88737	2.74e-22	2.98e-21
ZNF578	4	0.73373	9.7074	0.032937	0.75981	2.8e-22	3.05e-21
TP53I3	4	-0.85357	-9.7058	0.12377	0.88158	2.85e-22	3.1e-21
ZFP69	4	-0.95845	-9.7022	0.089459	0.84716	2.95e-22	3.21e-21
C15orf40	4	-0.85293	-9.6997	0.12402	0.88158	3.02e-22	3.28e-21
WFDC9	4	0.73315	9.6997	0.033084	0.75981	3.02e-22	3.28e-21
B3GNT2	4	-0.85315	-9.6982	0.12396	0.88158	3.07e-22	3.33e-21
INTS1	4	-0.89355	-9.6964	0.10954	0.8643	3.12e-22	3.39e-21
SESTD1	4	0.77781	9.6954	0.023646	0.71674	3.15e-22	3.42e-21
LRRC34	4	0.75505	9.6913	0.028261	0.74073	3.28e-22	3.56e-21
MEOX1	4	-0.83013	-9.6884	0.13315	0.89561	3.38e-22	3.66e-21
CCDC71L	4	-0.83396	-9.6868	0.13152	0.89561	3.43e-22	3.71e-21
CHEK1	4	-0.7985	-9.6861	0.14659	0.90464	3.45e-22	3.74e-21
DMKN	4	0.74633	9.6808	0.029935	0.755	3.64e-22	3.94e-21
KRT72	4	-0.76867	-9.6788	0.16096	0.91344	3.71e-22	4.01e-21
EPS8	4	0.78986	9.6781	0.021522	0.71548	3.74e-22	4.03e-21
C16orf70	4	-0.79891	-9.674	0.14641	0.90464	3.89e-22	4.2e-21
LPA	4	0.72703	9.673	0.034308	0.76167	3.93e-22	4.23e-21
PKMYT1	4	-0.79795	-9.6719	0.14679	0.90464	3.97e-22	4.28e-21
C4B	4	-0.86475	-9.6683	0.11939	0.87319	4.11e-22	4.43e-21
AKR1C1	4	0.74697	9.6672	0.02983	0.755	4.16e-22	4.48e-21
SYMPK	4	-0.85004	-9.6669	0.12495	0.88471	4.17e-22	4.49e-21
GYG2	4	-0.91258	-9.6653	0.10324	0.85573	4.23e-22	4.55e-21
ZNF649	4	-0.83732	-9.6627	0.12997	0.89335	4.34e-22	4.67e-21
CT45A6	4	0.75864	9.6623	0.027434	0.73203	4.36e-22	4.68e-21
FOXL1	4	-0.88568	-9.6613	0.11222	0.86867	4.4e-22	4.73e-21
OXSM	4	0.72595	9.659	0.034601	0.76318	4.5e-22	4.83e-21
BLOC1S3	4	0.74877	9.6577	0.029558	0.75233	4.56e-22	4.89e-21
AGBL5	4	-0.82746	-9.6484	0.13413	0.89561	4.99e-22	5.35e-21
EGR2	4	-0.91194	-9.6483	0.10345	0.85573	5e-22	5.35e-21
NOTO	4	-0.87681	-9.6455	0.1151	0.86867	5.14e-22	5.5e-21
TAAR5	4	0.74001	9.6453	0.031242	0.7562	5.15e-22	5.51e-21
FANCI	4	-0.91031	-9.6448	0.10401	0.85698	5.17e-22	5.53e-21
MBD6	4	-0.87399	-9.6442	0.11608	0.87196	5.2e-22	5.56e-21
TBC1D23	4	0.76803	9.642	0.025289	0.72168	5.31e-22	5.68e-21
PRAMEF14	4	0.72593	9.6394	0.034601	0.76318	5.45e-22	5.82e-21
PROSER2	4	0.74519	9.6367	0.030154	0.75538	5.6e-22	5.97e-21
YPEL5	4	-0.84019	-9.6324	0.12879	0.89099	5.84e-22	6.22e-21
CALML3	4	-0.81854	-9.6307	0.13784	0.89884	5.93e-22	6.33e-21
STK25	4	0.7609	9.6291	0.026921	0.73203	6.02e-22	6.42e-21
VCAM1	4	0.74969	9.6287	0.029359	0.74953	6.05e-22	6.44e-21
FBP1	4	0.74244	9.6286	0.030751	0.75538	6.06e-22	6.45e-21
OR52N5	4	-0.76998	-9.6278	0.16024	0.91344	6.1e-22	6.49e-21
ZNF736	4	0.79353	9.6275	0.020853	0.70941	6.12e-22	6.51e-21
ATP6AP1	4	-0.9102	-9.6271	0.10406	0.85704	6.14e-22	6.53e-21
SLITRK5	4	-0.78441	-9.6264	0.15327	0.90683	6.19e-22	6.57e-21
PRKG2	4	-0.86916	-9.6211	0.11776	0.8727	6.52e-22	6.92e-21
RRP9	4	-0.77559	-9.619	0.15744	0.911	6.64e-22	7.05e-21
ZNF100	4	-1.409	-9.6149	0.022747	0.71674	6.92e-22	7.33e-21
STAC3	4	-0.85751	-9.6093	0.12219	0.87934	7.31e-22	7.74e-21
TESPA1	4	-0.84748	-9.6088	0.12598	0.88505	7.34e-22	7.77e-21
ZCCHC24	4	0.71955	9.6083	0.036369	0.77065	7.38e-22	7.81e-21
EIF3C	4	-0.81725	-9.6068	0.1383	0.89932	7.49e-22	7.92e-21
ACYP1	4	0.73695	9.6067	0.032142	0.75981	7.49e-22	7.92e-21
ZFYVE9	4	-1.0156	-9.6059	0.075061	0.82824	7.55e-22	7.98e-21
RCHY1	4	-0.79307	-9.6043	0.14938	0.90549	7.67e-22	8.1e-21
ANLN	4	-0.87374	-9.5995	0.11614	0.87196	8.03e-22	8.48e-21
GINM1	4	-1.0412	-9.5961	0.069234	0.82291	8.31e-22	8.76e-21
APLF	4	-0.91563	-9.596	0.10225	0.85573	8.31e-22	8.77e-21
BRPF1	4	0.72407	9.5926	0.035124	0.76318	8.59e-22	9.05e-21
SYPL2	4	-0.88709	-9.591	0.11182	0.86867	8.72e-22	9.19e-21
GCNT3	4	0.73946	9.5909	0.031473	0.75768	8.73e-22	9.19e-21
MYH9	4	-0.74381	-9.5897	0.17385	0.92189	8.83e-22	9.29e-21
COX19	4	-0.82149	-9.5863	0.13668	0.89777	9.13e-22	9.59e-21
UBE3B	4	-0.82939	-9.5863	0.1335	0.89561	9.13e-22	9.59e-21
CFAP20	4	0.75316	9.5836	0.028595	0.74073	9.38e-22	9.85e-21
MTMR8	4	-0.878	-9.5794	0.11466	0.86867	9.76e-22	1.02e-20
STK3	4	-0.86873	-9.5789	0.11792	0.8727	9.81e-22	1.03e-20
NOL4	4	-0.90956	-9.5783	0.10435	0.8577	9.87e-22	1.03e-20
GRIK2	4	0.72478	9.5747	0.034999	0.76318	1.02e-21	1.07e-20
UIMC1	4	0.782	9.5725	0.022883	0.71674	1.04e-21	1.09e-20
PRRC2A	4	-0.78889	-9.5722	0.15139	0.90683	1.05e-21	1.1e-20
KIAA1429	4	-0.78356	-9.5717	0.15368	0.90691	1.05e-21	1.1e-20
TEKT3	4	-0.8835	-9.5693	0.11296	0.86867	1.08e-21	1.13e-20
TLE4	4	-0.81778	-9.5684	0.13809	0.89905	1.09e-21	1.13e-20
PQLC1	4	-0.77935	-9.5673	0.15553	0.90916	1.1e-21	1.15e-20
LINGO3	4	-0.9593	-9.5648	0.089197	0.84716	1.12e-21	1.17e-20
C1orf122	4	0.76417	9.5631	0.026084	0.72168	1.14e-21	1.19e-20
ADAMTS2	4	-0.74033	-9.5619	0.17588	0.92207	1.16e-21	1.21e-20
SLC25A4	4	-0.8558	-9.5595	0.12284	0.88006	1.18e-21	1.23e-20
PRPF40B	4	-0.85755	-9.5566	0.12219	0.87934	1.22e-21	1.27e-20
INHA	4	0.72336	9.5557	0.035302	0.76508	1.23e-21	1.28e-20
FLCN	4	0.83084	9.5557	0.015768	0.69333	1.23e-21	1.28e-20
SOCS5	4	-0.82816	-9.5557	0.13386	0.89561	1.23e-21	1.28e-20
ZNF534	4	0.77194	9.5551	0.024515	0.72074	1.24e-21	1.28e-20
TMEM56	4	-0.86003	-9.5536	0.12128	0.87844	1.25e-21	1.3e-20
ADAM28	4	-0.79681	-9.5527	0.14733	0.90464	1.26e-21	1.31e-20
GALNT18	4	0.72654	9.5516	0.034455	0.76318	1.28e-21	1.33e-20
CDKN2D	4	0.71305	9.5475	0.037918	0.77768	1.33e-21	1.38e-20
PYGL	4	0.72567	9.5473	0.034695	0.76318	1.33e-21	1.38e-20
DAAM1	4	0.71723	9.546	0.036809	0.77065	1.35e-21	1.4e-20
C3orf58	4	-0.81379	-9.5403	0.13988	0.90044	1.42e-21	1.48e-20
KLF3	4	0.78945	9.5383	0.021564	0.71562	1.45e-21	1.5e-20
PCDHA12	4	-0.81117	-9.5383	0.14101	0.90268	1.45e-21	1.5e-20
CXCL9	4	-0.81418	-9.536	0.13969	0.90044	1.48e-21	1.53e-20
RBPMS	4	-0.85471	-9.5316	0.12331	0.88112	1.55e-21	1.6e-20
ALDH8A1	4	-0.76281	-9.5307	0.16408	0.91613	1.56e-21	1.61e-20
ADNP2	4	-0.82899	-9.528	0.13357	0.89561	1.6e-21	1.65e-20
TBC1D9	4	-0.77344	-9.5278	0.15835	0.91202	1.61e-21	1.66e-20
YPEL2	4	0.75422	9.5277	0.028386	0.74073	1.61e-21	1.66e-20
HIGD1C	4	-0.93875	-9.5261	0.095286	0.85009	1.63e-21	1.68e-20
TBC1D3H	4	-0.83932	-9.5183	0.12917	0.8922	1.76e-21	1.81e-20
CCK	4	-0.76045	-9.5176	0.16526	0.91787	1.77e-21	1.82e-20
TJP3	4	0.72058	9.513	0.036097	0.76993	1.85e-21	1.91e-20
ASB14	4	-0.778	-9.5109	0.15611	0.90968	1.89e-21	1.94e-20
ADGRF1	4	-0.8679	-9.5104	0.1182	0.8727	1.9e-21	1.95e-20
TCP10L2	4	-0.7915	-9.5093	0.15007	0.90549	1.92e-21	1.97e-20
COX6B1	4	-0.82192	-9.5081	0.13654	0.8977	1.94e-21	1.99e-20
HRCT1	4	0.73253	9.5078	0.03323	0.75981	1.95e-21	2e-20
ZNF664-FAM101A	4	-0.80623	-9.5078	0.1429	0.90464	1.95e-21	2e-20
CCDC144A	4	0.75851	9.5048	0.027455	0.73203	2e-21	2.05e-20
IFNA5	4	-1.0056	-9.5033	0.077248	0.83192	2.03e-21	2.08e-20
HNRNPR	4	-0.80119	-9.5032	0.14532	0.90464	2.04e-21	2.08e-20
METTL9	4	0.76393	9.5007	0.026116	0.72168	2.09e-21	2.13e-20
CABP1	4	-1.147	-9.4969	0.050411	0.80694	2.16e-21	2.21e-20
PTPN11	4	-1.0338	-9.4967	0.070751	0.82488	2.17e-21	2.21e-20
EPG5	4	-0.75557	-9.4938	0.16775	0.91859	2.23e-21	2.28e-20
ST6GALNAC2	4	0.70628	9.4935	0.039445	0.78197	2.23e-21	2.28e-20
C1orf94	4	0.69113	9.491	0.043777	0.79368	2.29e-21	2.33e-20
SDS	4	-0.87799	-9.4894	0.11466	0.86867	2.32e-21	2.37e-20
RPA2	4	-0.81248	-9.4874	0.14044	0.90185	2.37e-21	2.41e-20
PTRHD1	4	-0.8744	-9.4833	0.11589	0.87196	2.46e-21	2.51e-20
MAGEA6	4	-0.89674	-9.483	0.10854	0.86318	2.47e-21	2.52e-20
SEMA5A	4	-0.78905	-9.4828	0.15127	0.90683	2.48e-21	2.52e-20
CCDC64B	4	-0.72821	-9.4804	0.18267	0.92418	2.53e-21	2.58e-20
SLC34A2	4	-0.79376	-9.4758	0.14898	0.90464	2.65e-21	2.69e-20
MYH11	4	-0.93206	-9.4755	0.097044	0.85209	2.66e-21	2.7e-20
TEX28	4	0.73524	9.4742	0.032592	0.75981	2.69e-21	2.73e-20
SLC40A1	4	-0.79461	-9.4639	0.14839	0.90464	2.97e-21	3.01e-20
LMNA	4	0.86848	9.4629	0.011886	0.66628	2.99e-21	3.04e-20
TMEM169	4	-0.89545	-9.4605	0.10892	0.86318	3.06e-21	3.11e-20
CDK19	4	-0.73351	-9.4586	0.17968	0.9234	3.12e-21	3.16e-20
MBOAT4	4	-0.75621	-9.4574	0.16736	0.91787	3.16e-21	3.2e-20
RBMY1E	4	-0.79232	-9.4561	0.14975	0.90549	3.2e-21	3.24e-20
CMPK2	4	-0.90182	-9.4543	0.10703	0.86045	3.25e-21	3.29e-20
SCNN1B	4	-0.79511	-9.4531	0.14815	0.90464	3.29e-21	3.33e-20
USP11	4	-0.80744	-9.4526	0.14248	0.90441	3.31e-21	3.34e-20
RDX	4	0.6989	9.4485	0.041653	0.79209	3.44e-21	3.47e-20
NUF2	4	-0.88534	-9.448	0.11232	0.86867	3.45e-21	3.49e-20
NFKB2	4	-0.77093	-9.4445	0.15973	0.91344	3.57e-21	3.6e-20
SDHA	4	-0.80186	-9.4427	0.145	0.90464	3.63e-21	3.66e-20
FPGS	4	-0.84295	-9.4427	0.12776	0.88775	3.63e-21	3.66e-20
OR8G1	4	-0.77578	-9.4419	0.15735	0.911	3.66e-21	3.69e-20
CCDC68	4	-0.90913	-9.439	0.10449	0.85836	3.77e-21	3.79e-20
TFCP2L1	4	-0.74187	-9.4351	0.17501	0.92189	3.91e-21	3.93e-20
NOP14	4	-0.77715	-9.4311	0.15658	0.91056	4.06e-21	4.08e-20
CHRAC1	4	-0.9068	-9.4273	0.10532	0.85928	4.21e-21	4.23e-20
EARS2	4	0.7101	9.4247	0.038608	0.78095	4.31e-21	4.34e-20
PARK2	4	0.7671	9.4232	0.02554	0.72168	4.38e-21	4.4e-20
DEFB128	4	-0.94191	-9.4208	0.094366	0.84965	4.48e-21	4.5e-20
ZNF800	4	0.72149	9.4205	0.035825	0.76771	4.49e-21	4.51e-20
PPP2R2A	4	-0.94411	-9.4162	0.093874	0.84894	4.68e-21	4.69e-20
COX7A2	4	-0.85238	-9.4153	0.12415	0.88158	4.72e-21	4.73e-20
PTPN21	4	0.75227	9.41	0.028815	0.74232	4.96e-21	4.97e-20
FOSL2	4	-0.78918	-9.4056	0.15125	0.90683	5.17e-21	5.18e-20
ZDHHC18	4	-0.81091	-9.4045	0.14108	0.90285	5.23e-21	5.23e-20
TMEM191C	4	-0.74266	-9.4005	0.17457	0.92189	5.43e-21	5.43e-20
OPN4	4	0.74965	9.3953	0.02937	0.74953	5.71e-21	5.71e-20
SPTAN1	4	-0.84446	-9.3952	0.12726	0.88716	5.71e-21	5.71e-20
C16orf54	4	-0.74931	-9.3952	0.17124	0.92189	5.71e-21	5.71e-20
OBP2A	4	-0.74468	-9.3943	0.1734	0.92189	5.76e-21	5.75e-20
FSHR	4	0.73878	9.3935	0.031661	0.75981	5.8e-21	5.79e-20
REEP4	4	-0.84256	-9.3915	0.12791	0.8878	5.91e-21	5.9e-20
CDC25C	4	0.70376	9.3901	0.040188	0.78468	6e-21	5.97e-20
RNF41	4	-0.7904	-9.3863	0.15065	0.90664	6.22e-21	6.19e-20
DNAJC22	4	-0.82791	-9.3851	0.13394	0.89561	6.29e-21	6.26e-20
TMEM199	4	0.73287	9.3836	0.033136	0.75981	6.37e-21	6.34e-20
AGMAT	4	-0.8858	-9.3818	0.11213	0.86867	6.49e-21	6.45e-20
PSMC4	4	0.72563	9.3788	0.034706	0.76318	6.68e-21	6.64e-20
MYH2	4	0.71732	9.3761	0.036798	0.77065	6.85e-21	6.8e-20
TEX13B	4	-0.80784	-9.3746	0.14235	0.90429	6.94e-21	6.89e-20
FKRP	4	-0.7834	-9.3735	0.1537	0.90691	7.02e-21	6.96e-20
MBIP	4	0.7833	9.37	0.022673	0.71674	7.25e-21	7.19e-20
TCERG1	4	-0.87136	-9.3698	0.11706	0.8727	7.27e-21	7.21e-20
ZNF26	4	-0.75637	-9.3695	0.16729	0.91787	7.29e-21	7.22e-20
ZNF804A	4	0.78511	9.3693	0.022422	0.71674	7.3e-21	7.23e-20
SCGB1D4	4	-0.76942	-9.3652	0.16052	0.91344	7.59e-21	7.51e-20
RPL36A	4	-0.79698	-9.3641	0.14726	0.90464	7.67e-21	7.59e-20
ATF2	4	-0.8057	-9.3625	0.14314	0.90464	7.78e-21	7.7e-20
ZNF28	4	-0.94254	-9.3607	0.094135	0.84894	7.92e-21	7.83e-20
IDH3B	4	0.70407	9.3599	0.040094	0.78405	7.98e-21	7.89e-20
CNOT2	4	-0.80271	-9.3588	0.1445	0.90464	8.06e-21	7.96e-20
BANK1	4	0.69934	9.3579	0.041528	0.79209	8.14e-21	8.03e-20
MOGAT1	4	-0.84391	-9.356	0.12743	0.88737	8.28e-21	8.17e-20
ELL3	4	0.72759	9.3551	0.034172	0.76131	8.35e-21	8.23e-20
UBAP2	4	-0.95166	-9.3546	0.091342	0.84894	8.39e-21	8.27e-20
CAMK2G	4	0.78763	9.3519	0.02192	0.71674	8.61e-21	8.48e-20
SWI5	4	-0.79797	-9.3486	0.14679	0.90464	8.88e-21	8.74e-20
MIR205HG	4	-0.90678	-9.345	0.10532	0.85928	9.19e-21	9.04e-20
SF3B1	4	-0.79303	-9.3436	0.14943	0.90549	9.31e-21	9.15e-20
PHF12	4	0.74424	9.3414	0.030322	0.75538	9.51e-21	9.34e-20
ING4	4	-0.92281	-9.3412	0.099744	0.85322	9.52e-21	9.35e-20
TGS1	4	-0.8731	-9.3409	0.11645	0.8722	9.55e-21	9.38e-20
SFRP5	4	-0.78285	-9.337	0.15391	0.90691	9.91e-21	9.72e-20
RASAL2	4	0.70966	9.3351	0.038692	0.7812	1.01e-20	9.9e-20
TSGA13	4	0.73591	9.3347	0.032456	0.75981	1.01e-20	9.93e-20
WDTC1	4	0.74775	9.3292	0.029694	0.75305	1.07e-20	1.05e-19
FBRS	4	0.71363	9.3291	0.037761	0.77723	1.07e-20	1.05e-19
EGLN1	4	-0.73417	-9.3263	0.17938	0.9234	1.1e-20	1.07e-19
RBKS	4	-0.82758	-9.3263	0.13409	0.89561	1.1e-20	1.07e-19
PRKAR2B	4	0.70919	9.3249	0.038828	0.78138	1.11e-20	1.09e-19
CLCC1	4	-0.86432	-9.3237	0.11959	0.87319	1.12e-20	1.1e-19
CYP27C1	4	-0.74503	-9.3216	0.17328	0.92189	1.15e-20	1.12e-19
PRRG4	4	0.74818	9.3213	0.029621	0.75293	1.15e-20	1.12e-19
TOP1MT	4	0.76889	9.3158	0.025122	0.72168	1.21e-20	1.18e-19
TTI2	4	-0.82734	-9.3107	0.1342	0.89561	1.27e-20	1.24e-19
RAB11B	4	0.81902	9.3097	0.017452	0.70232	1.28e-20	1.25e-19
M1AP	4	-0.85523	-9.3082	0.12304	0.8809	1.3e-20	1.27e-19
USP17L22	4	-0.89919	-9.2974	0.10769	0.86162	1.44e-20	1.4e-19
PCDH15	4	-0.79406	-9.295	0.14875	0.90464	1.47e-20	1.43e-19
CDKL3	4	-0.99641	-9.2948	0.079383	0.83315	1.47e-20	1.43e-19
TM9SF2	4	0.77777	9.2945	0.023646	0.71674	1.48e-20	1.44e-19
TLN1	4	0.71886	9.2933	0.036474	0.77065	1.5e-20	1.45e-19
ACAN	4	-0.78918	-9.2931	0.15125	0.90683	1.5e-20	1.46e-19
OR5H14	4	0.77625	9.2927	0.023856	0.71674	1.5e-20	1.46e-19
HPS4	4	-0.95799	-9.2926	0.089584	0.84716	1.51e-20	1.46e-19
C4BPB	4	-0.78434	-9.2924	0.15328	0.90683	1.51e-20	1.46e-19
CHRNB3	4	-0.84813	-9.2903	0.12567	0.88505	1.54e-20	1.49e-19
RGL3	4	0.69279	9.2872	0.043317	0.7931	1.58e-20	1.53e-19
AMTN	4	-0.76013	-9.2858	0.16545	0.91787	1.61e-20	1.55e-19
OR4N4	4	-0.78366	-9.2844	0.15362	0.90691	1.63e-20	1.57e-19
DDX23	4	-0.7144	-9.283	0.1903	0.9278	1.65e-20	1.59e-19
LYZL2	4	-0.79133	-9.2804	0.15012	0.90552	1.69e-20	1.63e-19
HIST1H3F	4	-0.77764	-9.2764	0.15629	0.90968	1.75e-20	1.69e-19
SQLE	4	-0.84717	-9.2755	0.12616	0.88505	1.77e-20	1.71e-19
ZNF107	4	-0.83488	-9.2753	0.13115	0.89561	1.77e-20	1.71e-19
NNAT	4	-0.78982	-9.2711	0.15094	0.90683	1.84e-20	1.78e-19
ICE2	4	-0.87957	-9.2663	0.11427	0.86867	1.93e-20	1.86e-19
SLC35E2	4	-0.81446	-9.2623	0.13962	0.90044	2e-20	1.93e-19
KRTAP5-8	4	-0.76234	-9.2605	0.16433	0.91613	2.03e-20	1.96e-19
CST1	4	0.7297	9.259	0.033775	0.76056	2.06e-20	1.99e-19
MTM1	4	0.7316	9.2585	0.03345	0.75981	2.07e-20	2e-19
FAM71F1	4	0.69566	9.258	0.042605	0.79209	2.08e-20	2e-19
SMIM18	4	0.84364	9.2544	0.014439	0.68395	2.15e-20	2.07e-19
ZNF793	4	0.71883	9.2532	0.036484	0.77065	2.18e-20	2.09e-19
DGKA	4	-0.82661	-9.2517	0.13453	0.89561	2.21e-20	2.12e-19
IKBKG	4	-0.81776	-9.2496	0.13809	0.89905	2.25e-20	2.16e-19
PNMA3	4	0.67694	9.2467	0.04813	0.8	2.31e-20	2.22e-19
OR52A1	4	-0.78753	-9.2466	0.1521	0.90683	2.32e-20	2.22e-19
CLDN24	4	0.71528	9.2463	0.037238	0.77519	2.32e-20	2.23e-19
CCR6	4	0.69473	9.2432	0.042783	0.79209	2.39e-20	2.29e-19
HS3ST3A1	4	-0.75169	-9.2418	0.16989	0.92188	2.42e-20	2.32e-19
GSTO1	4	-0.78029	-9.2365	0.15505	0.90916	2.55e-20	2.44e-19
OR1N2	4	-0.78325	-9.232	0.1538	0.90691	2.66e-20	2.54e-19
GCLC	4	-0.84057	-9.2318	0.12866	0.89095	2.66e-20	2.55e-19
[truncated: 17,116 more rows]

## Sheet: Supplementary Table S2
Supplementary Table S2.Quantification of metabolites in the negative ion mode
Compound Name	m/z (Expected)	RT	Library Score (%)	m/z (Delta (ppm))	1ul-neg-13	1ul-neg-14	1ul-neg-15	1ul-neg-16	1ul-neg-17	1ul-neg-18	1ul-neg-19	1ul-neg-20	1ul-neg-21	1ul-neg-22	1ul-neg-23	1ul-neg-24
(3S)-3,6-Diaminohexanoate/(3S,5S)-3,5-Diaminohexanoate	145.098	1.6	N/A	-0.142646	2.4066e+06	2.15894e+06	2.28721e+06	1.47229e+06	1.68007e+06	1.35073e+06	2.83948e+06	2.83949e+06	2.85147e+06	1.6421e+06	1.80639e+06	2.08252e+06
(RS)-Mevalonic acid	147.066	1.57	N/A	-0.963012	1.15887e+06	1.21626e+06	1.33005e+06	1.46796e+06	1.16009e+06	1.34898e+06	944956	1.05805e+06	1.03541e+06	926012	920919	880960
16-Hydroxypalmitic acid	271.228	9.86	20	0.403305	3.35371e+06	3.18874e+06	3.33234e+06	3.03526e+06	3.06187e+06	2.88669e+06	3.77387e+06	3.96865e+06	3.97044e+06	3.88061e+06	4.1716e+06	3.59209e+06
1-Hydroxy-2-aminoethylphosphonate	140.011	1.47	67	3.93395	146286	243325		109668	171391	186032	796891	777947	783441	335024	396759	268642
2-amino-2-methylpropanoate	102.056	1.47	100	4.8549	7.97432e+07	7.3991e+07	7.6597e+07	7.24416e+07	7.37813e+07	7.14399e+07	7.75206e+07	7.4434e+07	7.65994e+07	7.50389e+07	7.77393e+07	7.04459e+07
D-aspartate	132.03	1.49	9	3.49703	3.39703e+08	3.21656e+08	3.34127e+08	3.58561e+08	3.65743e+08	3.38606e+08	1.32938e+08	1.2878e+08	1.29324e+08	1.639e+08	1.74856e+08	1.48709e+08
2'-deoxyguanosine 5'-diphosphate	426.022	1.57	N/A	2.10088	1.33196e+06	1.47329e+06	1.52222e+06	1.49114e+06	1.25379e+06	1.56496e+06	613478	725419	434982	1.23008e+06	425546	1.12736e+06
2-hydroxybutyric acid	103.04	1.63	N/A	5.48237	2.77188e+06	2.56526e+06	3.07527e+06	2.96299e+06	2.97367e+06	2.79385e+06	2.15607e+06	2.1904e+06	2.30836e+06	2.70249e+06	2.5463e+06	2.52437e+06
2-Hydroxyglutarate	147.03	1.39	86	-0.439	3.32089e+07	3.02301e+07	3.2859e+07	3.73219e+07	3.68894e+07	3.54364e+07	2.69676e+07	2.74012e+07	2.83671e+07	3.9369e+07	4.26053e+07	3.58131e+07
2-Methylbutyric acid	101.06	6.89	33	5.55831	3431277	3110784	3633288	4168994	3972720	3979232	2323745	2306455	2353077	2927479	3054287	2778592
3-aminoisobutanoate	102.056	1.47	100	4.8549	7.97432e+07	7.3991e+07	7.6597e+07	7.24416e+07	7.37813e+07	7.14399e+07	7.75206e+07	7.4434e+07	7.65994e+07	7.50389e+07	7.77393e+07	7.04459e+07
3-hydroxy-3-methylglutarate	161.045	1.4	20	2.95712	3.34175e+07	3.09536e+07	3.39414e+07	2.52493e+07	2.51887e+07	2.4283e+07	2.33992e+07	2.30339e+07	2.395e+07	2.33708e+07	2.54881e+07	2.18975e+07
3-hydroxybenzyl alcohol	123.045	8.09	20	4.22537	977697	1.30865e+06	1.13018e+06	1.44372e+06	1.29489e+06	1.30797e+06	894338	892255	790333	1.04389e+06	889402	927700
3-Hydroxybutyric acid	103.04	1.63	N/A	5.38532	2.77188e+06	2.56526e+06	3.07527e+06	2.96299e+06	2.97367e+06	2.79385e+06	2.15607e+06	2.1904e+06	2.30836e+06	2.70249e+06	2.5463e+06	2.52437e+06
3-methyglutaric acid	145.05	10.32	33	3.17374	4871547	3381244	6563446	5012446	4614462	5795770	7269669	5961870	2683156	3910094	4389484	2273212
3-Methyl-2-oxovaleric acid/2-Ketohexanoic acid	129.056	6.47	33	-0.150519	5737367	5481844	6368959	4563511	4583002	4490253	5102445	4820591	5245294	4292229	4804788	3982688
4-aminobutanoate	102.056	1.47	100	4.8549	7.97432e+07	7.3991e+07	7.6597e+07	7.24416e+07	7.37813e+07	7.14399e+07	7.75206e+07	7.4434e+07	7.65994e+07	7.50389e+07	7.77393e+07	7.04459e+07
4-guanidinobutanoate	144.077	1.74	N/A	2.70075
L-Aspartate	132.03	1.49	86	3.49703	3.39703e+08	3.21656e+08	3.34127e+08	3.58561e+08	3.65743e+08	3.38606e+08	1.32938e+08	1.2878e+08	1.29324e+08	1.639e+08	1.74856e+08	1.48709e+08
4-Hydroxybenzyl alcohol	123.045	8.09	20	-0.000738148	977697	1.30865e+06	1.13018e+06	1.44372e+06	1.29489e+06	1.30797e+06	894338	892255	790333	1.04389e+06	889402	927700
4-Hydroxy-L-glutamic acid	162.041	1.47	N/A	0.395996	2.08289e+06	2.25247e+06	2.2765e+06	2.01898e+06	2.53691e+06	2.27701e+06	1.28379e+06	1.18784e+06	1.3921e+06	1.41465e+06	1.37358e+06	1.14111e+06
5-aminoimidazole-4-carboxamide-1-beta-d-ribofuranosyl 5'-monophosphate	337.055	1.45	54	-1.64063	71159	70164	72700	41419	88648	63241	26739	60686	95202	96348	95102	117354
5-L-Glutamyl-L-alanine	217.083	1.74	48	-0.390957	3865716	3765663	4212198	2508036	2174783	2152348	1908223	1965926	2064711	1744672	1618994	1528701
5'-methylthioadenosine	296.082	7.05	20	2.04228	120508	114117	136502	114419	111013	103634	132209	190431	165515	183267	182266	180323
5-oxo-D-proline	128.035	1.48	67	4.23109	2.55589e+08	2.46903e+08	2.55457e+08	2.12719e+08	1.97237e+08	1.9382e+08	1.47943e+08	1.4774e+08	1.53566e+08	1.54546e+08	1.55242e+08	1.42313e+08
Ala-Glu	217.081	1.74	63	7.20988	3865716	3765663	4212198	2508036	2174783	2131905	1908223	1965926	2064711	1744672	1618994	1528701
6-Hydroxyhexanoic acid	131.071	4.32	14	-0.285506	164724	148643	175186	192102	179684	181090	144764	171881	185312	194019	180221	159770
Acetyl-CoA	808.119	6.28	73	1.36898	2.13185e+06	1.91674e+06	2.18102e+06	1.9907e+06	1.35826e+06	1.93689e+06	2.56952e+06	789299	2.2025e+06	2.3231e+06	2.02332e+06	545691
Adenine	134.047	7.04	50	4.06594	1002809	867332	1070593	851951	798808	773634	950225	1253384	1179329	1229017	1194308	1357051
Adenosine 5'-diphosphate(ADP)	426.022	1.57	N/A	2.0774	1.33196e+06	1.47329e+06	1.52222e+06	1.49114e+06	1.25379e+06	1.56496e+06	613478	725419	434982	1.23008e+06	425546	1.12736e+06
Adenosine 5'-monophosphate	346.056	1.58	80	0.518943	4.75003e+07	4.82397e+07	5.07519e+07	3.44425e+07	2.94424e+07	2.77053e+07	3.78528e+07	4.17671e+07	4.96453e+07	4.16974e+07	4.09051e+07	4.31826e+07
Adenylsuccinic acid	462.067	1.28	N/A	0.849244	695951	640325	775553	612219	623761	612540	368698	360491	344708	627199	609307	466592
Adonitol	151.061	2.46	20	4.44938	2195049	1985198	1949751	1943878	2159214	1887354	2002363	1915852	2008632	1750991	1996575	1974182
Argininosuccinic acid	289.115	1.45	N/A	-0.0904852	1.15384e+06	947305	1.21278e+06	481264	659676	494909	587354	495248	612899	281389	251844	273273
Allantoin	157.036	1.59	N/A	3.17344	754062	894734	903143	791647	789001	619502	587235	558750	697728	712678	694054	577500
2-Dehydro-L-gulonate/3-Dehydro-L-gulonate	193.035	1.49	N/A	-0.553089	5.63442e+06	6.13741e+06	5.63863e+06	8.90278e+06	9.45838e+06	8.77864e+06	3.4533e+06	2.96104e+06	2.79721e+06	4.50623e+06	4.53405e+06	3.63523e+06
alpha-hydroxyisobutyric acid	103.04	1.63	N/A	5.48237	2.77188e+06	2.56526e+06	3.07527e+06	2.96299e+06	2.97367e+06	2.79385e+06	2.15607e+06	2.1904e+06	2.30836e+06	2.70249e+06	2.5463e+06	2.52437e+06
alpha-Ketoglutaric acid(Oxoglutaric acid)	145.014	1.39	43	-0.54161	1.55094e+07	1.47333e+07	1.61837e+07	1.50857e+07	1.58307e+07	1.44937e+07	2.17353e+07	2.16087e+07	2.22717e+07	1.60327e+07	1.64209e+07	1.47884e+07
Alpha-Linolenic acid(18:3)	277.217	10.17	25	0.0840625	1.22496e+07	5.56e+06	6.11546e+06	6.35477e+06	1.15873e+07	8.53722e+06	3.23543e+06	4.64821e+06	4.08147e+06	8.08785e+06	7.66641e+06	4.62831e+06
Aminoadipic acid	160.062	1.74	20	-0.344646	5.32808e+07	5.09894e+07	5.54889e+07	4.51608e+07	4.29267e+07	4.11375e+07	2.72065e+07	2.67859e+07	2.68634e+07	3.6136e+07	3.6614e+07	3.06211e+07
Arabinonic acid	165.04	1.48	NA	2.73677	14672541	14964918	13007585	17226334	18525382	17531576	8310197	7064665	8053868	12592358	13664846	10227045
Arabinose	149.046	1.5	20	-0.839679	1.0969e+07	9.77726e+06	1.05522e+07	1.0139e+07	1.20026e+07	1.17555e+07	7.58006e+06	7.6513e+06	6.92927e+06	1.02113e+07	1.04521e+07	9.41452e+06
Arabinose/Xylulose/Ribulose/Arabinose/Ribose/Xylose/Lyxose	149.046	1.5	20	-0.839679	1.0969e+07	9.77726e+06	1.05522e+07	1.0139e+07	1.20026e+07	1.17555e+07	7.58006e+06	7.6513e+06	6.92927e+06	1.02113e+07	1.04521e+07	9.41452e+06
Arabitol/Ribitol/Xylitol	151.061	2.46	20	4.44938	2195049	1985198	1949751	1943878	2159214	1887354	2002363	1915852	2008632	1750991	1996575	1974182
Arachidic acid(20:0)	311.296	16.31	25	0.314034	22395174	16372453	20275742	17992677	20822376	15976516	12060002	14522156	14355361	15085380	15187098	14391756
D-Glucuronic acid	193.035	1.49	N/A	-0.553089	5.63442e+06	6.13741e+06	5.63863e+06	8.90278e+06	9.45838e+06	8.77864e+06	3.4533e+06	2.96104e+06	2.79721e+06	4.50623e+06	4.53405e+06	3.63523e+06
galacturonic acid	193.035	1.49	N/A	2.19253	5.49846e+06	6.00513e+06	5.5657e+06	8.90278e+06	9.45838e+06	8.77235e+06	3.4533e+06	2.95834e+06	2.79721e+06	4.50649e+06	4.53405e+06	3.63523e+06
Ascorbic acid	175.024	1.38	N/A	2.72368	600102	648684	1.10794e+06	593307	509628	511187	684853	540059	612096	598014	650666	521151
Asp-Asp	247.056	1.37	70	4.51256	3.03039e+06	2.90941e+06	3.20351e+06	2.88039e+06	2.97051e+06	2.63389e+06	2.45122e+06	2.08729e+06	2.08334e+06	2.80746e+06	3.02292e+06	2.2419e+06
Asp-Thr	233.077	1.72	22	4.64537	619866	637517	627519	704792	619899	537412	384351	365754	402684	527859	501358	485303
Benzenebutanoic acid	163.076	7.65	11	-0.0801722	8.90836e+06	8.29523e+06	9.33075e+06	9.4602e+06	9.1118e+06	8.82697e+06	5.61576e+06	5.58168e+06	5.79131e+06	5.72305e+06	6.049e+06	5.45548e+06
N-Formylmethionine	176.038	3.4	40	2.76491	2.75177e+06	2.48116e+06	2.79714e+06	1.85767e+06	1.71383e+06	1.54261e+06	1.43183e+06	1.43618e+06	1.48228e+06	1.3293e+06	1.40497e+06	1.28772e+06
beta-Nicotiamide adenine dinucleotide 2'-phosphatereduced(NADPH)	744.084	1.37	N/A	1.13536	483943	275058	410980	593361	1.10564e+06	1.11259e+06	295143	257301	213770	336190	331544	363518
Bicine	162.077	1.74	29	-0.062237	958606	1.7799e+06	3.41253e+06	922610	2.08495e+06	3.79397e+06	1.40931e+06	800548	518680	2.30665e+06	295447	537432
Butoxyacetic acid	131.071	4.32	14	-0.209212	164724	148643	175186	192102	179684	181090	144764	171881	185312	194019	180221	159770
Butyrylcarnitine	230.14	6.44	N/A	-0.0909725	173528	186758	188461	231350	240016	192484	168989	172558	177275	220170	227621	175829
Capric acid(10:0)	171.138	8.49	33	3.24605	8.70355e+06	4.93016e+06	5.05218e+06	4.8656e+06	5.06657e+06	4.79525e+06	4.32771e+06	4.56128e+06	4.31702e+06	4.52046e+06	4.60009e+06	4.16009e+06
Carnosine	225.099	1.68	48	2.39982	2.03423e+06	1.92577e+06	1.90163e+06	1.79722e+06	1.62155e+06	1.6569e+06	2.6643e+06	2.51228e+06	2.93443e+06	2.74633e+06	2.56576e+06	2.28488e+06
CDP-ethanolamine	445.053	1.48	N/A	0.143538	284306	286571	353997	383409	630768	544629	1.72477e+06	1.49789e+06	1.14034e+06	1.19558e+06	1.24382e+06	1.01212e+06
Cellobiose	341.109	1.75	57	0.0658067	3.9305e+06	2.09835e+06	4.37255e+06	2.35935e+06	2.27889e+06	1.76299e+06	2.34166e+06	2.23275e+06	2.04872e+06	3.22152e+06	2.29802e+06	1.76333e+06
cholesterol sulfate	465.304	11.39	20	-0.324625	7.30721e+06	7.00788e+06	5.97267e+06	9.12759e+06	1.18543e+07	9.40996e+06	6.34689e+06	7.76012e+06	6.48261e+06	6.32759e+06	7.1881e+06	8.37427e+06
Cinnamoylglycine	204.067	6.7	10	-0.164016	361737	330549	383295	230003	237700	219927	201118	213145	205478	223190	232819	189658
cis-4-Hydroxy-D-proline	130.05	1.58	80	3.79728	2.20888e+07	2.13847e+07	2.30124e+07	1.03627e+07	1.19841e+07	1.18627e+07	9.87063e+06	1.03256e+07	1.06789e+07	1.11335e+07	9.05892e+06	7.88514e+06
cis-Aconitic acid	173.009	1.34	24	2.68105	3.21871e+06	2.80009e+06	3.53175e+06	3.35473e+06	3.30312e+06	2.95068e+06	3.84279e+06	3.61678e+06	3.44439e+06	4.12147e+06	4.78613e+06	3.35714e+06
Citraconic acid	129.019	1.39	19	0.377169	6.61831e+06	5.866e+06	6.6217e+06	6.89933e+06	6.69301e+06	6.78066e+06	5.77458e+06	6.09689e+06	5.75207e+06	7.68117e+06	7.87306e+06	6.96434e+06
citrate	191.019	1.45	72	2.53975	2.43424e+07	2.62483e+07	2.67792e+07	2.65611e+07	2.63738e+07	2.65944e+07	2.74237e+07	2.39384e+07	2.41783e+07	2.56482e+07	2.65603e+07	1.99993e+07
N-Acetylglutamine	187.072	1.65	76	-0.0358193	22521562	23002909	22653867	17480844	15266683	15814870	12037978	12769619	12853245	11346410	11604470	10929433
CMP-N-Acetyl-neuraminic acid	613.139	1.46	20	1.12894	7.19984e+06	6.79974e+06	6.5366e+06	6.37113e+06	6.76095e+06	7.08479e+06	6.78795e+06	6.22863e+06	6.21654e+06	7.80395e+06	8.17426e+06	6.45214e+06
Coenzyme A	766.108	1.74	N/A	1.08652	987130	1.05877e+06	1.20921e+06	1.50667e+06	1.6634e+06	1.15123e+06	971810	1.50148e+06	1.03696e+06	1.18988e+06	1.23075e+06	1.36706e+06
Myoinositol	179.056	1.56	39	0.091297	1.71363e+08	1.7149e+08	1.70368e+08	9.42264e+07	8.91033e+07	8.48942e+07	9.58605e+07	9.42719e+07	9.4229e+07	6.67552e+07	6.60145e+07	6.26132e+07
creatinine	112.051	1.76	25	4.83068	5.92473e+06	5.60987e+06	5.73843e+06	5.05708e+06	5.54641e+06	5.72558e+06	6.01364e+06	5.63993e+06	5.68465e+06	5.55183e+06	5.7242e+06	4.90916e+06
Cys-Pro	217.064	6.68	40	5.3557	372601	423028	457333	700897	615316	592813	722444	960618	1.45484e+06	460083	476213	504589
Cytidine	242.078	2.59	25	7.7008	680687	601704	694671	184512	163520	170353	578785	585724	649378	259290	2132	239110
Tagatose/Gulose/Fructose/Galactose/Mannose/Sorbose/Allose	179.056	1.56	NA	0.091297	1.71363e+08	1.7149e+08	1.70368e+08	9.42264e+07	8.91033e+07	8.48942e+07	9.58605e+07	9.42719e+07	9.4229e+07	6.67552e+07	6.60145e+07	6.26132e+07
Cytidine diphosphate choline	487.1	1.48	N/A	0.849656	415504	637999	505800	581985	560985	453293	1.09964e+06	666784	825869	604373	580544	633097
Cytidine monophosphate N-acetylneuraminic acid	613.14	1.46	20	0.231917	7.19984e+06	6.79974e+06	6.5366e+06	6.37113e+06	6.75269e+06	7.08479e+06	6.78795e+06	6.22863e+06	6.21654e+06	7.80395e+06	8.17426e+06	6.45214e+06
dIMP	331.045	1.48	N/A	2.89362	2.40334e+06	3.01403e+06	2.85189e+06	1.94496e+06	1.94349e+06	2.11637e+06	1.45485e+06	1.5822e+06	1.57165e+06	1.29161e+06	1.02658e+06	1.25271e+06
D-Alpha-aminobutyric acid	102.056	1.47	100	4.8549	7.97432e+07	7.3991e+07	7.6597e+07	7.24416e+07	7.37813e+07	7.14399e+07	7.75206e+07	7.4434e+07	7.65994e+07	7.50389e+07	7.77393e+07	7.04459e+07
D-Arabinono-1,4-lactone	147.03	1.39	39	-0.439	3.32089e+07	3.02301e+07	3.2859e+07	3.73219e+07	3.68894e+07	3.54364e+07	2.69676e+07	2.74012e+07	2.83671e+07	3.9369e+07	4.26053e+07	3.58131e+07
D-Arabinose 5-phosphate/D-Ribulose 5-phosphate	229.012	1.4	32	-0.353695	3.78862e+06	3.68707e+06	3.91583e+06	4.44904e+06	4.22039e+06	3.79804e+06	4.87899e+06	3.34352e+06	3.09389e+06	4.96705e+06	5.19245e+06	3.77233e+06
D-Arabitol	151.061	2.46	20	4.44938	2195049	1985198	1949751	1943878	2159214	1887354	2002363	1915852	2008632	1750991	1996575	1974182
N-Acetylornithine	173.093	1.76	NA	-0.462664	2.98387e+06	2.96297e+06	3.19842e+06	1.5944e+06	1.56329e+06	1.4295e+06	1.74768e+06	1.65171e+06	1.70679e+06	1.13392e+06	1.05884e+06	927574
Deoxycytidine	226.083	1.74	N/A	2.58475	766862	709533	765549	645773	477280	472230	589257	639699	476580	535161	544237	346369
Desaminotyrosine	165.056	6.53	30	-0.495836	158051		122714
D-fructose 6-phosphate	259.022	1.39	79	1.86584	3.30404e+07	3.2719e+07	3.69547e+07	5.99862e+07	5.97648e+07	5.63984e+07	3.93885e+07	3.71649e+07	3.32342e+07	6.13277e+07	6.25382e+07	4.83726e+07
D-Galactosamine	178.072	1.63	N/A	0.127165	1.38435e+06	1.37641e+06	1.30202e+06	1.17272e+06	1.20922e+06	1.18803e+06	719249	827399	1.00835e+06	915434	903463	949273
D-galactose 1-phosphate	259.022	1.39	79	1.90444	3.30404e+07	3.2719e+07	3.69547e+07	5.99862e+07	5.97648e+07	5.63984e+07	3.93885e+07	3.71649e+07	3.32342e+07	6.13277e+07	6.25382e+07	4.83726e+07
D-gluconate	177.04	1.51	N/A	2.36631	1.68003e+06	1.78818e+06	1.73133e+06	1.7763e+06	1.74612e+06	1.87043e+06	639973	770498	870225	926307	1.24358e+06	872877
D-glucono-1,5-lactone	177.04	1.51	N/A	2.36631	1.68003e+06	1.78818e+06	1.73133e+06	1.7763e+06	1.74612e+06	1.87043e+06	639973	770498	870225	926307	1.24358e+06	872877
D-Glucosamine 6-phosphate	258.038	1.46	10	-0.247068	2.40464e+07	2.30485e+07	2.34683e+07	2.28689e+07	2.35022e+07	2.20023e+07	1.28074e+07	1.25886e+07	1.24503e+07	1.50982e+07	1.48069e+07	1.23717e+07
D-Glucose 1-phosphate	259.022	1.39	41	1.86584	3.30404e+07	3.2719e+07	3.69547e+07	5.99862e+07	5.97648e+07	5.63984e+07	3.93885e+07	3.71649e+07	3.32342e+07	6.13277e+07	6.25382e+07	4.83726e+07
D-Glucose-6-phosphate	259.022	1.39	79	1.86584	3.30404e+07	3.2719e+07	3.69547e+07	5.99862e+07	5.97648e+07	5.63984e+07	3.93885e+07	3.71649e+07	3.32342e+07	6.13277e+07	6.25382e+07	4.83726e+07
allothreonine	118.05	1.58	33	4.82238	1.40381e+08	1.35775e+08	1.36577e+08	9.66407e+07	8.6185e+07	8.4402e+07	7.99492e+07	7.9537e+07	8.9376e+07	5.62796e+07	5.68673e+07	5.82923e+07
D-glucuronolactone	175.024	1.38	N/A	2.72368	600102	648684	1.10794e+06	593307	509628	511187	684853	540059	612096	598014	650666	521151
D-Glutamic acid	146.045	1.49	29	2.14571	1.97948e+09	1.83817e+09	1.93284e+09	1.76198e+09	1.79852e+09	1.68824e+09	1.83214e+09	1.80528e+09	1.81201e+09	1.76e+09	1.8488e+09	1.6401e+09
Dihydroxyacetone phosphate	168.99	1.38	22	2.44238	713311	840213	952329	1157411	1284584	1163215	1730502	1341885	1116236	1366160	1565822	1141579
Dimethyl sulfone	93.0016	6.52	N/A	-2.15613	896363	877751	924683	923846	903515	827923	861230	1.01733e+06	989510	791961	909085	878902
L-threonine	118.05	1.58	33	4.82238	1.40381e+08	1.35775e+08	1.36577e+08	9.66407e+07	8.6185e+07	8.4402e+07	7.99492e+07	7.9537e+07	8.9376e+07	5.62796e+07	5.68673e+07	5.82923e+07
D-lactose	341.108	1.75	57	1.61957	3.9305e+06	2.09835e+06	4.37255e+06	2.35935e+06	2.27889e+06	1.76299e+06	2.34166e+06	2.23275e+06	2.04872e+06	3.22152e+06	2.29802e+06	1.76333e+06
DL-Palmitoylcarnitine	398.328	11.57	12	-0.118664	611905	540002	637454	409803	318323	311856	700109	746703	659232	596614	607139	562447
D-mannose 6-phosphate	259.022	1.39	79	1.86584	3.30404e+07	3.2719e+07	3.69547e+07	5.99862e+07	5.97648e+07	5.63984e+07	3.93885e+07	3.71649e+07	3.32342e+07	6.13277e+07	6.25382e+07	4.83726e+07
Phosphoribosyl formamidocarboxamide	365.05	1.73	N/A	2.47746	1.4721e+06	1.41245e+06	1.74279e+06	896394	797010	741646	927773	875582	1.07369e+06	534495	567747	497590
D-Ornithine	131.082	1.61	30	4.17094	1.84228e+06	1.61487e+06	2.0146e+06	1.46888e+06	1.42885e+06	1.34747e+06	2.82517e+06	3.08728e+06	3.09002e+06	2.24743e+06	2.0272e+06	2.31136e+06
D-Phenyllactic acid	165.056	6.53	30	-0.495836	158051		122714
L-Tyrosine	180.066	2.53	38	2.32123	9.27784e+07	8.28227e+07	9.31913e+07	6.87713e+07	6.41341e+07	5.87624e+07	5.69886e+07	5.57769e+07	6.17069e+07	4.54514e+07	4.90992e+07	4.19971e+07
D-Xylitol	151.061	1.62	NA	4.44938	2796649	2666594	2937556	2376223	2341234	2467003	3259658	3201844	2907556	3113037	3427369	3117051
D-Xylulose 5-phosphate	229.012	1.4	32	-0.353695	3.78862e+06	3.68707e+06	3.91583e+06	4.44904e+06	4.22039e+06	3.79804e+06	4.87899e+06	3.34352e+06	3.09389e+06	4.96705e+06	5.19245e+06	3.77233e+06
L-methionine	148.043	2.39	25	3.14682	1.31e+07	1.17279e+07	1.30205e+07	9.30481e+06	9.13387e+06	8.1301e+06	8.69855e+06	8.77891e+06	9.19764e+06	5.44521e+06	6.12961e+06	5.29806e+06
erythritol	121.05	1.64	68	4.27535	1.61712e+06	1.34366e+06	1.69277e+06	1.34373e+06	1.21182e+06	1.25927e+06	1.26234e+06	1.53642e+06	1.43982e+06	1.08946e+06	1.17286e+06	973160
FA(15:1)-H	239.201	10.06	10	1.43617	1.9245e+06	1.52883e+06	5.44716e+06	1.9821e+06	2.16015e+06	1.83027e+06	1.46752e+06	1.26561e+06	1.24264e+06	1.24954e+06	1.18227e+06	1.38839e+06
FA(17:1)-H	267.233	10.88	25	0.909789	2.20592e+07	1.93693e+07	4.04659e+07	1.96055e+07	2.02223e+07	1.69044e+07	1.40789e+07	1.41199e+07	1.45797e+07	1.32742e+07	1.34194e+07	1.32946e+07
FA(20:2)-H	307.264	12.08	22	0.0488344	1.20969e+07	1.14815e+07	1.6244e+07	9.76871e+06	1.08833e+07	9.93152e+06	8.66079e+06	8.18944e+06	9.40979e+06	7.66018e+06	7.72914e+06	7.84001e+06
FA(20:3)-H	305.248	11.11	37	1.20361	3.21617e+06	2.76426e+06	4.03167e+06	2.08811e+06	2.20027e+06	2.05167e+06	4.00047e+06	4.24575e+06	4.43003e+06	3.12867e+06	3.13188e+06	2.80491e+06
FA(22:1)-H	337.312	16.04	N/A	-0.985857	11934397	10343488	13534423	7828057	7878947	6878190	9343483	10821256	10584152	10136434	10262985	10100497
FA(22:2)-H	335.296	14.2	N/A	-1.22638	8.36621e+06	9.57079e+06	1.10073e+07	7.25986e+06	4.70834e+06	5.04993e+06	3.27169e+06	4.21644e+06	3.73081e+06	3.2337e+06	4.00408e+06	3.60207e+06
4-Hydroxybenzenesulfonic acid	172.991	6.78	14	-0.158725	1.9491e+06	1.82342e+06	2.09578e+06	4.56458e+06	4.04494e+06	4.00358e+06	1.35634e+06	1.41688e+06	1.43337e+06	3.25941e+06	3.40816e+06	2.84098e+06
FA(22:5)-H	329.248	10.76	42	1.93655	2725690	2558191	3062888	1842427	1891125	1559191	5432141	5338257	5082313	2940333	3180913	2812046
FA(23:3)-H	347.296	13.61	N/A	-0.689953	236283	215822	226409				150612	464006	375966	270323	173506	273919
FA(24:3)-H	361.312	14.68	N/A	-0.34834	339320	120431	217500	141494	152717	192115	387109	417409	463098	381257	424250	244405
FA(24:4)-H	359.296	12.98	N/A	-1.33074	2016647	2056805	2276946	1321056	1329556	1185989	3211989	3561675	3659509	2462707	2353369	2227539
FA(24:5)-H	357.28	11.77	N/A	0.804227	15257794	14253466	15848624	9532453	8710941	8691499	23546121	25165884	25987338	14759297	14642062	13778457
FA(24:6)-H	355.265	11.05	N/A	-0.732976	787851	1.0423e+06	958268	483765	244088		1.17634e+06	1.33544e+06	1.27832e+06	778180	662675	696462
FA(25:1)-H	379.359	13.2	N/A	-0.385331	399375	1.16537e+06	658651	914644	1.42061e+06	757153	358094	668245	489431	473343	1.31876e+06	589634
FAD(flavin adenine dinucleotide)	784.149	6.47	61	2.11819	701755	688141	777896	750870	794819	667861	772452	713862	761952	866447	806777	638413
fumarate	115.003	1.39	26	4.39211	47146398	44774984	48658417	54840086	53428929	51694949	32450815	31176272	33854489	46028791	48027744	41350390
phenol sulfate	172.991	6.78	14	3.02063	1.9491e+06	1.82342e+06	2.09578e+06	4.56458e+06	4.04494e+06	4.00358e+06	1.35634e+06	1.41688e+06	1.43337e+06	3.25941e+06	3.40816e+06	2.84098e+06
L-Leucine	130.087	2.74	43	2.70976	112714477	101901371	117453488	84673504	82340861	77503991	84537944	85537058	87196216	60559836	65239943	55961390
gama-Aminobutryic acid(GABA)	102.056	1.47	100	-0.24036	7.97432e+07	7.3991e+07	7.6597e+07	7.24416e+07	7.37813e+07	7.14399e+07	7.75206e+07	7.4434e+07	7.65994e+07	7.50389e+07	7.77393e+07	7.04459e+07
Gamma Glutamylglutamic acid	275.088	1.38	N/A	0.654966	2.8031e+06	2.43308e+06	2.49521e+06	3.16134e+06	3.03214e+06	2.91901e+06	3.15801e+06	2.74002e+06	3.0355e+06	3.69304e+06	3.86502e+06	2.95572e+06
Gluconic acid	195.05	1.49	35	1.96636	4.07295e+07	4.40507e+07	3.79479e+07	3.79463e+07	3.92446e+07	3.64161e+07	3.57256e+07	2.96831e+07	3.24907e+07	3.38988e+07	3.30063e+07	2.72527e+07
Gluconolactone	177.04	1.51	N/A	2.36631	1.68003e+06	1.78818e+06	1.73133e+06	1.7763e+06	1.74612e+06	1.87043e+06	639973	770498	870225	926307	1.24358e+06	872877
Glu-Ile	259.128	3.65	62	6.49365	1063165	967008	1097173	1137696	1103797	1053851	2403872	2379121	2422439	2327102	2417372	2093453
Glu-Leu	259.128	3.65	64	6.49365	1063165	967008	1097173	1137696	1103797	1053851	2403872	2379121	2422439	2327102	2417372	2093453
Glutathione	306.077	1.65	72	-0.339169	5.05749e+08	5.33548e+08	5.49568e+08	6.84886e+08	5.77611e+08	5.76328e+08	8.17285e+08	8.63018e+08	9.6491e+08	9.4271e+08	9.12182e+08	9.03402e+08
Glyceraldehyde 3-phosphate	168.99	1.38	22	2.38321	713311	840213	952329	1157411	1284584	1163215	1730502	1341885	1116236	1366160	1565822	1141579
Glycerate 2-phosphate	184.986	1.34	31	-0.0420726	387467	378287	415975	608019	534657	622752	578557	464701	452754	420359	441792	302382
Glycerate 3-phosphate	184.986	1.36	10	-0.0420726	387467	378287	415975	608019	534657	622752	578557	464701	452754	420359	441792	302382
glycerol 2-phosphate	171.006	1.4	50	3.01794	7.48229e+07	6.97577e+07	7.43337e+07	7.07541e+07	6.78995e+07	6.6489e+07	8.02313e+07	8.22754e+07	8.34763e+07	6.95593e+07	7.31743e+07	6.5701e+07
Glycerol 3-phosphate	171.006	1.4	50	-0.0813659	7.48229e+07	6.97577e+07	7.43337e+07	7.07541e+07	6.78995e+07	6.6489e+07	8.02313e+07	8.22754e+07	8.34763e+07	6.95593e+07	7.31743e+07	6.5701e+07
L-valine	116.071	1.76	100	4.10198	1.15262e+08	1.05799e+08	1.20963e+08	8.42786e+07	8.27648e+07	8.05449e+07	9.00248e+07	8.86541e+07	8.78438e+07	6.31635e+07	6.67047e+07	5.80686e+07
Glycineamideribotide	285.049	1.44	N/A	0.790952
guanosine 5'-monophosphate	362.05	1.46	34	1.81461	2.59753e+06	2.66623e+06	2.70497e+06	2.42396e+06	3.16558e+06	2.95357e+06	2.77432e+06	2.72362e+06	1.993e+06	3.10532e+06	2.84979e+06	2.5719e+06
Heptanoic acid	129.092	7.21	NA	4.52127	1.21033e+06	1.7627e+06	1.04573e+06	1.23265e+06	1.12495e+06	1.15717e+06	1.69268e+06	1.14495e+06	1.41546e+06	1.13489e+06	1.21724e+06	1.03843e+06
hippurate	178.05	2.75	67	2.87956	N/F	75027	63735	39700	N/F	N/F	45031	N/F	84499	82488	79629	22959
Histidine	154.062	1.65	40	3.16927	2.78513e+07	2.51177e+07	2.70042e+07	2.14369e+07	2.20304e+07	2.15066e+07	2.74148e+07	2.53802e+07	2.60808e+07	1.9202e+07	2.04688e+07	1.64969e+07
Hydroxyphenyllactic acid	181.05	2.63	70	2.94929	3.32707e+07	2.75934e+07	3.2085e+07	3.92909e+07	3.42629e+07	3.2724e+07	1.4661e+07	1.28442e+07	1.52223e+07	2.63555e+07	2.88105e+07	2.1676e+07
PG(16:1_18:1)-H	745.503	12.1	71	-0.342705	4.37641e+08	3.82453e+08	4.21258e+08	3.85706e+08	4.23851e+08	3.82661e+08	3.05483e+08	3.2293e+08	3.45138e+08	2.50652e+08	2.50046e+08	2.33824e+08
Ile-Glu	259.129	3.65	62	2.28723	1063165	967008	1097173	1137696	1103797	1053851	2403872	2379121	2422439	2327102	2417372	2093453
Indolelactic acid/5-Methoxyindoleacetate	204.067	6.7	NA	-0.164016	361737	330549	383295	230003	237700	219927	201118	213145	205478	223190	232819	189658
Inosine 5'-phosphate	347.039	1.46	70	1.58897	3.69248e+06	3.38838e+06	3.36178e+06	2.68316e+06	3.71512e+06	3.66969e+06	2.93005e+06	2.84133e+06	1.95165e+06	3.16492e+06	3.52396e+06	2.92158e+06
IS-Cholic acid-D4	411.305	8.07	79	-0.314304	3.20493e+07	3.23964e+07	3.17467e+07	3.17553e+07	3.14737e+07	3.07717e+07	3.07917e+07	2.99677e+07	3.17618e+07	3.2105e+07	3.22979e+07	3.06725e+07
IS-FA(10:0)-D19	190.258	8.45	N/A	1.34168	9.9421e+06	9.39902e+06	9.47267e+06	9.36254e+06	9.9177e+06	9.67193e+06	9.48626e+06	9.18463e+06	9.53409e+06	1.00558e+07	9.63981e+06	9.41041e+06
IS-FA(16:0)-D31	286.428	11.02	N/A	0.879269	2.60531e+06	2.52664e+06	2.43139e+06	2.26586e+06	2.59847e+06	2.64892e+06	2.49607e+06	2.72055e+06	2.7799e+06	2.51038e+06	2.50831e+06	2.46903e+06
isocitric acid	191.019	1.45	72	2.53975	2.43424e+07	2.62483e+07	2.67792e+07	2.65611e+07	2.63738e+07	2.65944e+07	2.74237e+07	2.39384e+07	2.41783e+07	2.56482e+07	2.65603e+07	1.99993e+07
IS-Phenylalanine-D8	172.122	6.16	67	0.0655826	4.69515e+06	4.5517e+06	4.5301e+06	4.40051e+06	4.17386e+06	4.30834e+06	4.05128e+06	4.41474e+06	4.80276e+06	4.06903e+06	4.24046e+06	4.32903e+06
IS-Stearic acid-D35	318.484	13.1	25	-1.78916	2.48551e+08	2.47476e+08	2.37669e+08	2.30178e+08	2.33486e+08	2.11125e+08	2.21905e+08	2.43064e+08	2.39368e+08	2.15307e+08	2.36082e+08	2.45862e+08
IS-succinate-D4	121.044	1.39	70	-0.368071	3.4183e+07	3.32999e+07	3.32224e+07	3.14426e+07	3.50237e+07	3.25269e+07	3.31605e+07	3.27954e+07	3.24731e+07	3.11299e+07	3.22985e+07	3.13008e+07
IS-Tryptophan-D5	208.114	6.65	90	-0.150491	7.75812e+06	7.5604e+06	7.68916e+06	7.29351e+06	7.39647e+06	7.33978e+06	7.45758e+06	7.12337e+06	7.52569e+06	7.56834e+06	7.58143e+06	7.1737e+06
Itaconic acid	129.019	1.39	NA	0.377169	6.61831e+06	5.866e+06	6.6217e+06	6.89933e+06	6.69301e+06	6.78066e+06	5.77458e+06	6.09689e+06	5.75207e+06	7.68117e+06	7.87306e+06	6.96434e+06
Ketoleucine	129.055	6.47	33	4.11122	5737367	5481844	6368959	4563511	4583002	4490253	5102445	4820591	5245294	4292229	4804788	3982688
L-(+)-2-Aminobutyric acid	102.056	1.47	100	-0.24036	7.97432e+07	7.3991e+07	7.6597e+07	7.24416e+07	7.37813e+07	7.14399e+07	7.75206e+07	7.4434e+07	7.65994e+07	7.50389e+07	7.77393e+07	7.04459e+07
L-3-Phenyllactic acid	165.056	6.53	30	-0.495836	158051		122714
lactate	89.0239	1.56	60	5.94583	6.9625e+08	6.32116e+08	7.17473e+08	7.35633e+08	7.17996e+08	6.61805e+08	6.85838e+08	6.97229e+08	7.17099e+08	7.21184e+08	7.33795e+08	7.09147e+08
PG(18:1_18:2)-H	771.52	12	65	-2.82374	1.59221e+08	1.41732e+08	1.60098e+08	1.66515e+08	1.89859e+08	1.59134e+08	1.12843e+08	1.19948e+08	1.30915e+08	9.71874e+07	9.24294e+07	9.0433e+07
L-Arabitol	151.061	1.62	NA	4.44938	2796649	2666594	2937556	2376223	2341234	2467003	3259658	3201844	2907556	3113037	3427369	3117051
D-tryptophan	203.082	6.66	45	2.3591	4.14663e+07	3.92184e+07	4.36815e+07	3.29774e+07	3.13525e+07	2.96783e+07	3.26434e+07	3.21488e+07	3.33501e+07	2.5518e+07	2.64647e+07	2.27215e+07
L-tryptophan	203.082	6.66	56	2.3591	4.14663e+07	3.92184e+07	4.36815e+07	3.29774e+07	3.13525e+07	2.96783e+07	3.26434e+07	3.21488e+07	3.33501e+07	2.5518e+07	2.64647e+07	2.27215e+07
Lauric acid(12:0)	199.17	9.3	25	2.28917	8.96961e+07	4.17869e+07	4.68783e+07	4.71118e+07	7.76224e+07	6.0321e+07	2.40586e+07	3.27761e+07	3.122e+07	5.30521e+07	5.30727e+07	3.24441e+07
L-Erythrulose	119.035	1.56	N/A	-0.228508	1.79668e+06	1.6492e+06	2.15113e+06	1.93306e+06	1.84349e+06	1.71784e+06	1.68488e+06	2.13678e+06	2.1231e+06	1.76964e+06	1.8967e+06	2.13757e+06
Leucinic acid;Hydroxyisocaproic acid	131.071	4.32	14	-0.285506	164724	148643	175186	192102	179684	181090	144764	171881	185312	194019	180221	159770
Leu-Glu	259.129	3.65	61	2.28723	1063165	967008	1097173	1137696	1103797	1053851	2403872	2379121	2422439	2327102	2417372	2093453
L-glutamic acid	146.045	1.47	59	2.14571	1.97948e+09	1.83817e+09	1.93284e+09	1.76198e+09	1.79852e+09	1.68824e+09	1.83214e+09	1.80528e+09	1.81201e+09	1.76e+09	1.8488e+09	1.6401e+09
L-Isoleucine	130.087	2.96	43	2.70976	150283177	136204974	156084322	117153925	116138256	106896504	116343691	118441723	119841572	85836343	93195622	78253687
Linoleic acid(18:2)	279.233	10.64	20	-0.400304	2.0608e+08	8.7871e+07	1.08316e+08	1.02312e+08	1.82422e+08	1.35509e+08	4.97041e+07	7.18433e+07	6.72804e+07	1.25978e+08	1.24883e+08	7.17921e+07
PG(17:1_18:1)-H	759.519	12.07	62	-0.28926	93444423	81995537	89798183	91746723	108026670	91471162	70005318	68529008	77548467	60298076	57217783	53784159
PG(14:0_18:2)-H	717.472	11.9	74	-0.331335	2.00904e+07	1.80715e+07	1.9748e+07	1.87348e+07	1.93711e+07	1.7165e+07	1.52565e+07	1.51478e+07	1.72499e+07	1.3969e+07	1.39534e+07	1.33504e+07
L-lysine	145.098	1.6	N/A	3.44114	2.4066e+06	2.15894e+06	2.28721e+06	1.47229e+06	1.68007e+06	1.35073e+06	2.83948e+06	2.83949e+06	2.85147e+06	1.6421e+06	1.80639e+06	2.08252e+06
L-lyxonate	165.04	1.48	10	2.73677	14672541	14964918	13007585	17226334	18525382	17531576	8310197	7064665	8053868	12592358	13664846	10227045
PG(16:1_16:1)-H	717.472	11.89	85	0.184365	2.00904e+07	1.80715e+07	1.9748e+07	1.87348e+07	1.93711e+07	1.7165e+07	1.52565e+07	1.51478e+07	1.72499e+07	1.3969e+07	1.39534e+07	1.33504e+07
L-Methionine S-oxide	164.039	1.59	N/A	0.265721	1.00823e+06	851723	829112	499014	406503	568289	187833	353896	288590	156208	179340	146097
L-Ornithine	131.083	1.61	30	0.12767	1.84228e+06	1.61487e+06	2.0146e+06	1.46888e+06	1.42885e+06	1.34747e+06	2.82517e+06	3.08728e+06	3.09002e+06	2.24743e+06	2.0272e+06	2.31136e+06
PG(16:0_18:3)-H	743.488	11.91	71	-0.546694	2.06923e+07	1.85415e+07	2.05599e+07	2.16612e+07	2.10944e+07	1.9332e+07	1.60759e+07	1.60667e+07	1.81187e+07	1.27704e+07	1.2517e+07	1.22625e+07
LPA(16:1)-H	407.221	10.78	59	-0.04309	1772386	1616858	1753689	1781210	1848175	1654698	1980174	3182359	2230994	1736266	2020211	2521844
LPC(15:0)+CH3COO	540.331	11.54	64	-1.42993	8.01925e+07	6.9872e+07	9.43773e+07	9.24519e+07	9.95287e+07	8.78923e+07	1.20321e+08	1.23599e+08	1.34178e+08	1.25798e+08	1.2434e+08	1.21052e+08
LPE(14:0)-H	424.247	10.44	40	0.646737	657999	652666	715250	905017	758463	799493	915123	1.14259e+06	976798	1.18349e+06	1.09381e+06	1.22242e+06
LPE(16:0)-H	452.278	11.3	70	-0.0412015	3.11518e+07	2.87623e+07	3.10444e+07	3.25261e+07	3.41939e+07	3.00697e+07	4.31841e+07	4.67375e+07	4.6233e+07	4.72874e+07	4.97275e+07	4.46933e+07
LPE(16:1)-H	450.263	10.64	70	0.358044	8.62376e+06	7.84706e+06	8.83775e+06	8.72949e+06	9.14369e+06	8.21818e+06	6.33388e+06	9.28979e+06	7.3325e+06	7.13001e+06	7.24078e+06	8.43034e+06
LPE(17:0)-H	466.294	11.8	40	-0.0402511	1.96292e+06	1.89207e+06	3.00829e+06	2.44289e+06	2.3953e+06	2.27281e+06	3.07661e+06	3.43043e+06	3.26189e+06	3.73453e+06	3.62436e+06	3.69715e+06
LPE(17:1)-H	464.279	11.03	35	-0.648911	1.57727e+06	1.20996e+06	1.04097e+06	1.33134e+06	1.49006e+06	1.44374e+06	1.27328e+06	1.98025e+06	1.28618e+06	1.29579e+06	1.31598e+06	1.68389e+06
LPE(18:1)-H	478.294	11.48	70	-1.10641	4.3003e+07	4.01592e+07	5.64044e+07	4.43182e+07	5.81331e+07	4.01659e+07	3.80512e+07	5.18009e+07	5.65999e+07	4.17661e+07	4.31419e+07	4.71399e+07
LPE(18:2)-H	476.278	10.89	70	0.668074	1.55295e+06	1.47484e+06	1.72739e+06	1.1022e+06	2.08434e+06	1.69077e+06	1.62097e+06	2.46725e+06	1.73501e+06	1.5854e+06	1.52349e+06	2.00304e+06
LPE(20:4)-H	500.278	10.84	90	0.432687	5.78303e+06	5.32664e+06	5.78636e+06	6.40736e+06	7.01658e+06	6.35926e+06	8.38401e+06	1.39964e+07	9.94845e+06	8.30264e+06	7.97267e+06	1.07694e+07
LPE(20:5)-H	498.263	10.43	47	-0.699347	536100	601541	623375	561082	652294	595372	1.02704e+06	1.73983e+06	1.19819e+06	1.02677e+06	939985	1.39793e+06
LPE(22:4)-H	528.309	11.47	34	1.24537	100604	113175	148340	113824	201008	168618	274736	478751	512096	331444	192733	196243
LPE(22:5)-H	526.294	10.97	66	-0.0776993	711015	655491	911619	770324	863429	712996	967184	2689833	1691155	941334	1005599	1832038
LPE(22:6)-H	524.278	10.78	90	0.604754	4.36053e+06	3.81289e+06	4.56293e+06	4.32037e+06	4.96026e+06	4.14536e+06	5.93818e+06	8.54042e+06	7.14996e+06	5.95245e+06	5.63097e+06	7.28311e+06
PG(16:1_18:2)-H	743.488	11.88	80	-1.28645	2.06923e+07	1.85415e+07	2.05599e+07	2.16612e+07	2.10944e+07	1.9332e+07	1.60759e+07	1.60667e+07	1.812e+07	1.27704e+07	1.2517e+07	1.22625e+07
LPG(16:1)-H	481.258	9.79	34	-0.40848	987092	894818	941629	1205471	1162131	1118276	722483	531944	706136	705574	697844	499683
Glycerophosphocholine	256.096	1.59	N/A	1.015	4.00342e+06	3.71664e+06	3.57125e+06	3.39198e+06	2.94848e+06	3.09465e+06	3.17994e+06	2.93316e+06	3.44176e+06	2.14667e+06	2.00213e+06	2.04519e+06
LPG(18:1)-H	509.289	10.3	63	-0.589955	1.30328e+07	1.19909e+07	1.45941e+07	1.70656e+07	1.58004e+07	1.60472e+07	1.13985e+07	1.33919e+07	1.22571e+07	1.32683e+07	1.36221e+07	1.24741e+07
LPG(20:1)-H	537.32	10.68	37	0.622738	571744	520120	614697	690528	758157	669993	536335	556672	517051	784199	773055	672645
L-Asparagine	131.046	1.55	34	3.85035	6.24206e+06	6.35e+06	6.27051e+06	6.28532e+06	5.33331e+06	5.55695e+06	5.3086e+06	5.45826e+06	5.32887e+06	4.21255e+06	4.59345e+06	4.48596e+06
L-Glutamine	145.061	1.56	40	3.35705	1.23038e+08	1.22865e+08	1.21076e+08	1.43603e+08	1.27133e+08	1.24532e+08	1.01609e+08	1.02757e+08	1.09325e+08	7.25362e+07	7.17013e+07	7.43261e+07
LPI(16:0)-H	571.289	10.05	83	0.428571	6.29299e+06	5.33092e+06	6.37343e+06	5.04612e+06	5.20199e+06	4.65617e+06	8.28298e+06	8.98021e+06	8.79458e+06	7.71479e+06	7.85853e+06	6.51544e+06
LPI(17:0)-H	585.304	10.31	77	0.95643	1.76161e+06	1.75601e+06	1.87739e+06	1.71277e+06	1.8674e+06	1.61089e+06	2.02437e+06	2.43451e+06	2.18845e+06	1.98499e+06	1.86267e+06	1.78944e+06
FA(22:3)-H	333.28	12.69	N/A	0.885237	1.05293e+06	879254	1.03017e+06	634566	627677	463170	1.33995e+06	1.40099e+06	1.53061e+06	788129	783271	731090
LPI(20:4)-H	619.289	9.86	80	-0.469757	372620	348952	414420	316661	329959	262597	678870	1825978	1016580	522494	592269	1093132
L-proline	114.056	1.69	58	3.48195	4.09507e+08	3.51429e+08	3.93582e+08	2.76332e+08	2.81154e+08	2.70771e+08	3.94096e+08	3.83049e+08	3.94524e+08	3.44028e+08	3.5658e+08	3.10443e+08
LPS(16:0)-H	496.269	10.04	50	-0.956659	7.5563e+06	6.51841e+06	7.87236e+06	6.84625e+06	6.95936e+06	6.21207e+06	3.65769e+06	4.06171e+06	3.83071e+06	3.55751e+06	3.6297e+06	3.461e+06
L-serine	104.035	1.56	20	5.63631	1.06977e+07	1.06137e+07	1.0929e+07	1.60703e+07	1.4402e+07	1.33731e+07	8.41301e+06	8.35861e+06	8.40041e+06	8.66296e+06	8.88723e+06	8.73534e+06
LPS(18:1)-H	522.284	10.17	67	0.190787	6.21941e+06	4.31748e+06	6.27623e+06	5.76687e+06	5.88171e+06	5.33272e+06	4.81964e+06	6.20364e+06	3.00854e+06	4.50174e+06	2.9648e+06	4.59173e+06
PG(18:2_18:2)-H	769.503	11.84	50	0.00985222	14680030	12573220	14626406	15103980	15972164	13835516	15517689	15829418	18195968	11991116	11429540	11120151
Uridine 5'-monophosphate	323.028	1.42	65	1.59366	5.05578e+07	4.76873e+07	5.04478e+07	3.57946e+07	3.6451e+07	3.53879e+07	3.60223e+07	3.56994e+07	3.49553e+07	4.22574e+07	4.38509e+07	3.87872e+07
LPI(18:0)-H	599.32	10.53	89	0.196855	2.6462e+07	2.36009e+07	2.684e+07	1.87677e+07	1.93606e+07	1.64439e+07	2.63167e+07	2.92855e+07	2.97925e+07	2.16028e+07	2.25552e+07	2.12481e+07
Cytidine 5'-monophosphate	322.044	1.4	66	1.60229	1.07158e+07	1.03793e+07	1.09463e+07	7.79171e+06	7.91175e+06	7.99582e+06	8.15763e+06	8.53837e+06	8.17154e+06	9.41368e+06	9.78191e+06	8.92793e+06
lumichrome	241.073	7.84	22	0.542802	261096	287584	318331	329328	252255	300763	241076	267817	300610	277599	253194	233360
beta-alanine	88.0399	1.66	66	6.29369	1.3563e+08	1.31589e+08	1.37526e+08	1.37205e+08	1.32912e+08	1.27223e+08	1.02472e+08	1.00338e+08	1.04304e+08	1.18436e+08	1.24578e+08	1.13134e+08
L-Xylonate	165.04	1.48	NA	2.73677	14672541	14964918	13007585	17226334	18525382	17531576	8310197	7064665	8053868	12592358	13664846	10227045
maleamate	114.019	1.4	N/A	4.44753	3.36902e+06	2.73179e+06	3.17546e+06	3.39079e+06	3.00344e+06	2.89223e+06	2.28382e+06	2.3803e+06	2.77395e+06	2.67593e+06	2.33367e+06	2.42466e+06
Maleic acid	115.003	1.39	56	4.39211	47146398	44774984	48658417	54840086	53428929	51694949	32450815	31176272	33854489	46028791	48027744	41350390
Malic acid	133.014	1.4	55	2.95942	5.44138e+08	5.02553e+08	5.56191e+08	6.12739e+08	6.19389e+08	5.90589e+08	3.63889e+08	3.56711e+08	3.78783e+08	5.46222e+08	5.80403e+08	4.90034e+08
mannosamine	178.072	1.63	N/A	3.04734	1.38435e+06	1.37641e+06	1.30202e+06	1.17272e+06	1.20922e+06	1.18803e+06	719249	827399	1.00835e+06	915434	903463	949273
Methylmalonic acid	117.019	1.39	67	4.0935	175015386	160750023	183041065	172517134	176310541	159791887	144764782	144753911	145396538	188353088	203621697	173400519
D-alanine	88.0399	1.66	66	6.29369	1.3563e+08	1.31589e+08	1.37526e+08	1.37205e+08	1.32912e+08	1.27223e+08	1.02472e+08	1.00338e+08	1.04304e+08	1.18436e+08	1.24578e+08	1.13134e+08
Myristic acid(14:0)	227.201	10.15	20	2.01849	1.93992e+08	1.51448e+08	1.96322e+08	1.66196e+08	1.99491e+08	1.65103e+08	1.18626e+08	1.25537e+08	1.27086e+08	1.44155e+08	1.41669e+08	1.22628e+08
Myristoleic acid(14:1)	225.185	9.62	N/A	2.67273	4.15822e+06	3.99022e+06	5.54978e+06	4.11012e+06	4.19878e+06	3.9173e+06	2.90751e+06	2.8902e+06	3.07376e+06	2.72828e+06	2.78837e+06	2.92784e+06
NA(nicotinic acid)	122.025	2.46	36	-0.0737856	142633	108489	144753	185835	187894	156943	404759	402774	412161	415340	452028	339035
L-alanine	88.0399	1.66	66	6.29369	1.3563e+08	1.31589e+08	1.37526e+08	1.37205e+08	1.32912e+08	1.27223e+08	1.02472e+08	1.00338e+08	1.04304e+08	1.18436e+08	1.24578e+08	1.13134e+08
N-Acetylaspartylglutamic acid	303.083	1.31	57	0.230713	1.36393e+07	1.26242e+07	1.41906e+07	1.0023e+07	9.80163e+06	9.79353e+06	1.59321e+07	1.53675e+07	1.61876e+07	1.31824e+07	1.37705e+07	1.07405e+07
N-Acetyl-DL-methionine	190.054	5.04	75	2.96471	4.62985e+06	4.30816e+06	5.03435e+06	2.15166e+06	2.18523e+06	1.99904e+06	2.48289e+06	2.4671e+06	2.5496e+06	1.95971e+06	2.08593e+06	1.77758e+06
N-acetyl-D-tryptophan	245.093	6.86	77	2.23368	8.21529e+06	7.81488e+06	8.80055e+06	6.73784e+06	6.71223e+06	6.3219e+06	9.65716e+06	9.53061e+06	9.77402e+06	7.92113e+06	8.14596e+06	6.89268e+06
sarcosine	88.0399	1.66	66	6.29369	1.3563e+08	1.31589e+08	1.37526e+08	1.37205e+08	1.32912e+08	1.27223e+08	1.02472e+08	1.00338e+08	1.04304e+08	1.18436e+08	1.24578e+08	1.13134e+08
Galactitol	181.071	1.61	76	3.24536	1.34896e+07	1.33933e+07	1.33137e+07	8.67594e+06	8.24001e+06	8.41245e+06	1.91695e+07	1.95074e+07	2.02799e+07	1.20284e+07	1.18966e+07	1.1503e+07
N-Acetylglycine	116.035	1.58	N/A	4.68039	4372002	4067673	4224717	2704824	2301487	2235149	1387497	1367907	1765125	1497935	1296977	1439809
N-acetyl-L-alanine	130.05	1.72	44	3.79728	2.20888e+07	2.13847e+07	2.30124e+07	1.03627e+07	1.19841e+07	1.18627e+07	9.87063e+06	1.03256e+07	1.06789e+07	1.11335e+07	9.05892e+06	7.88514e+06
Sorbitol	181.071	1.61	NA	3.24536	1.34896e+07	1.33933e+07	1.33137e+07	8.67594e+06	8.24001e+06	8.41245e+06	1.91695e+07	1.95074e+07	2.02799e+07	1.20284e+07	1.18966e+07	1.1503e+07
N-acetyl-L-cysteine	162.023	1.76	20	0.000207037	1.41841e+06	1.30031e+06	1.65622e+06	853121	945291	584723	337240	717690	369526	343120	360155	611853
N-acetylleucine	172.097	6.57	66	3.3104	4572899	4263192	4888508	2420689	2410592	2269459	3573566	3574121	3702264	2211650	2307534	1987526
N-Acetyl-L-phenylalanine	206.082	6.75	32	-0.00891368	5.3193e+06	5.06201e+06	5.6906e+06	5.11576e+06	4.85391e+06	4.60894e+06	7.54389e+06	7.80168e+06	7.9589e+06	6.44227e+06	6.70908e+06	5.72947e+06
N-Acetyl-L-tyrosine	222.077	4.25	47	0.361745	17693976	16350255	18706289	14251999	13807566	13094099	12901531	13089525	13379644	12023430	12610540	10878969
N-Acetylneuraminic acid	308.098	1.49	57	1.82922	9.04199e+06	8.82051e+06	9.13404e+06	8.003e+06	7.82395e+06	7.38159e+06	4.64601e+06	4.3176e+06	4.83065e+06	5.14978e+06	5.3772e+06	4.87437e+06
Theobromine/Paraxanthine/Theophylline	181.071	1.61	NA	3.24536	1.34896e+07	1.33933e+07	1.33137e+07	8.67594e+06	8.24001e+06	8.41245e+06	1.91695e+07	1.95074e+07	2.02799e+07	1.20284e+07	1.18966e+07	1.1503e+07
NAD(Nicotinamide adenine dinucleotide)	662.101	1.75	100	1.43832	8.65785e+06	9.53869e+06	1.03107e+07	1.22281e+07	1.21283e+07	1.07718e+07	1.5364e+07	1.60572e+07	1.51014e+07	1.77352e+07	1.653e+07	1.39554e+07
NADH(Reduced nicotinamide adenine dinucleotide)	664.117	1.77	N/A	0.885627	2.21749e+06	2.33603e+06	2.58936e+06	2.79619e+06	2.85059e+06	2.58616e+06	2.77415e+06	3.22246e+06	3.17202e+06	3.56467e+06	3.33918e+06	3.17651e+06
NADH(Reduced nicotinamide adenine diphosphate)	664.117	1.77	N/A	0.885627	2.21749e+06	2.33603e+06	2.58936e+06	2.79619e+06	2.85059e+06	2.58616e+06	2.77415e+06	3.22246e+06	3.17202e+06	3.56467e+06	3.33918e+06	3.17651e+06
NADP(nicotinamide adenine dinucleotide phosphate)	742.068	1.38	N/A	1.02157	436133	636850	584728	773112	941368	808440	373247	217712	255005	586175	445948	187385
N-alpha-acetyl-L-asparagine	173.056	1.58	N/A	2.799	4.4549e+06	4.07638e+06	4.38294e+06	4.65201e+06	3.67125e+06	3.75243e+06	1.88474e+06	1.62043e+06	2.00794e+06	1.96591e+06	1.85515e+06	1.79368e+06
NAM(nicotinamide)	121.041	1.77	43	-0.284659	2697836	2284173	2660757	3382227	3719680	3866171	5425544	5349394	4283417	5697667	5713403	3613312
N-arachidonoyl taurine	410.237	10.12	25	4.90515	664583	522055	647821	527764	407365	395351	1293218	1272971	1292593	890800	870198	642035
Docosahexaenoic acid(22:6)	327.233	10.39	90	0.617656	2853907	2597752	2769993	1803810	1772446	1643862	5617197	6196197	5845967	3070713	3169180	3141816
Niacinamide(VB3)	121.041	1.77	43	-0.202043	2697836	2284173	2660757	3382227	3719680	3866171	5425544	5349394	4283417	5697667	5713403	3613312
Nicotinic acid	122.024	2.46	36	4.18766	142633	108489	144753	185835	187894	156943	404759	402774	412161	415340	452028	339035
N-methyl-L-glutamate	160.061	1.74	20	2.90411	5.32808e+07	5.09894e+07	5.54889e+07	4.51608e+07	4.29267e+07	4.11375e+07	2.72065e+07	2.67859e+07	2.68634e+07	3.6136e+07	3.6614e+07	3.06211e+07
N-oleoyl taurine	388.253	10.39	27	0.399454	7.74341e+06	7.26848e+06	8.41023e+06	6.38127e+06	5.66801e+06	5.86725e+06	9.17573e+06	1.0386e+07	1.00925e+07	6.59527e+06	6.74619e+06	5.89152e+06
N-palmitoyl taurine	362.237	10.28	33	0.475316	3.33613e+06	2.90779e+06	3.69878e+06	2.69687e+06	2.46164e+06	2.49989e+06	4.6679e+06	4.95653e+06	4.63926e+06	4.24706e+06	4.47195e+06	3.7284e+06
octulose-monophosphate(O8P-O1P)	319.044	1.38	N/A	0.0285281	1.18679e+06	1.19733e+06	1.35498e+06	1.64384e+06	1.50018e+06	1.60153e+06	2.24368e+06	1.85418e+06	1.79994e+06	2.51172e+06	2.53141e+06	1.80003e+06
Oenanthic ether	157.123	8.09	NA	-0.516738	1.01046e+07	8.31183e+06	8.89985e+06	9.02551e+06	8.65245e+06	8.81065e+06	8.11989e+06	7.91709e+06	7.95952e+06	8.52944e+06	9.06066e+06	7.89942e+06
Oleic acid/Elaidic acid/Vaccenic acid/Petroselinic acid(18:1)	281.249	11.4	25	-0.788595	6.31896e+08	5.08823e+08	7.04472e+08	4.39108e+08	4.88574e+08	3.99351e+08	3.91299e+08	4.17124e+08	4.35749e+08	3.82153e+08	4.0279e+08	3.50879e+08
O-Phosphorylethanolamine	140.011	1.47	28	3.93395	146286	243325		109668	171391	186032	796891	777947	783441	335024	396759	268642
ophthalmic acid	288.12	1.73	82	2.35935	1.5483e+06	1.66079e+06	1.65145e+06	2.03647e+06	1.94719e+06	1.77911e+06	3.09716e+06	3.30826e+06	3.38986e+06	3.5482e+06	3.26784e+06	2.87961e+06
Oxidized glutathione	611.145	1.42	100	0.369051	8.81694e+06	7.56255e+06	7.53337e+06	1.05228e+07	1.30628e+07	1.28346e+07	1.01445e+07	1.01576e+07	7.70427e+06	1.07307e+07	1.17944e+07	1.01362e+07
Palmitic acid(16:0)	255.233	11.04	20	-1.23649	5.23531e+09	4.15589e+09	5.36281e+09	4.62944e+09	5.24004e+09	4.43951e+09	3.09522e+09	3.28188e+09	3.46916e+09	3.5571e+09	3.52758e+09	3.06201e+09
Palmitoleic acid/Gaidic acid(16:1)	253.217	10.41	33	0.156594	8.77209e+07	8.03185e+07	1.66563e+08	7.95385e+07	7.84076e+07	7.00315e+07	4.9659e+07	5.225e+07	5.49998e+07	4.98126e+07	5.05306e+07	5.22906e+07
Pantothenic acid	218.103	2.95	40	-0.80949	3.03221e+08	2.6811e+08	3.2898e+08	2.54108e+08	2.14201e+08	1.98919e+08	4.41338e+08	4.65497e+08	5.737e+08	4.06846e+08	4.42242e+08	3.73541e+08
p-Cresol sulfate	187.006	7.35	83	2.97499	1.73988e+06	1.60413e+06	1.68674e+06	1.48596e+06	1.31393e+06	1.41277e+06	1.02551e+06	1.00719e+06	957558	1.08696e+06	1.1848e+06	1.00196e+06
Pelargonic acid(9:0)	157.123	8.09	NA	-0.516738	1.01046e+07	8.31183e+06	8.89985e+06	9.02551e+06	8.65245e+06	8.81065e+06	8.11989e+06	7.91709e+06	7.95952e+06	8.52944e+06	9.06066e+06	7.89942e+06
Pentadecanoic acid(15:0)	241.217	10.66	25	0.277343	7.90873e+07	7.00873e+07	1.17891e+08	8.1271e+07	8.23031e+07	7.46473e+07	5.00211e+07	5.08271e+07	5.37405e+07	5.49071e+07	5.66536e+07	5.13028e+07
LPS(18:0)-H	524.299	10.51	75	0.0130237	1.35569e+07	1.25353e+07	1.39971e+07	1.36315e+07	1.37334e+07	1.23752e+07	1.67887e+07	1.95943e+07	1.81561e+07	1.57758e+07	1.60697e+07	1.51371e+07
PG(15:0_16:0)-H	707.487	12.18	62	0.96025	962452	1049656	773178	1969036	2376660	1736823	1841429	2255795	2140212	2195289	2444835	2563125
PG(15:0_18:1)/PG(16:0_17:1)-H	733.504	12.02	80	-0.644828	28281109	24800711	27883279	30156719	34397928	29431136	20929786	21477329	24243469	22017928	20683537	19566254
PG(16:0_10:0)/PG(14:0_12:0)-H	637.409	11.6	70	-0.185871
PG(16:0_12:0)-H	665.44	11.85	80	0.0590063	240988	265978	278789	350004	414973	322823	716147	704493	818872	763529	737501	742694
PG(16:0_12:1)-H	663.425	11.64	55	-0.699299
PG(16:0_14:0)-H	693.472	12.07	73	0.15353	5.41932e+06	4.34574e+06	4.59549e+06	5.40219e+06	6.70248e+06	5.44268e+06	9.20283e+06	1.00328e+07	1.00335e+07	1.02051e+07	9.45732e+06	1.0165e+07
PG(16:0_14:1)-H	691.457	11.86	93	-0.807036	3.00195e+06	2.50764e+06	2.90392e+06	3.23778e+06	3.52419e+06	2.89566e+06	3.28421e+06	3.55476e+06	4.03711e+06	3.67266e+06	3.65281e+06	3.47421e+06
PG(16:0_16:0)-H	721.504	12.32	77	-1.90457	10955193	9675025	8496530	12133820	17517390	13952828	26982265	36938007	33956454	26451295	26129056	31457098
PG(16:0_16:1)-H	719.488	12.09	80	-1.26437	1.06285e+08	9.30772e+07	9.74825e+07	9.54437e+07	1.05881e+08	9.40684e+07	1.03344e+08	1.07924e+08	1.1431e+08	9.64532e+07	9.29225e+07	9.23677e+07
PG(16:0_18:1)-H	747.52	12.31	69	-1.61383	157600098	153299475	148899667	159154100	208684792	177879634	212233647	259278847	264959373	198807146	199347592	214305705
PG(16:0_18:2)-H	745.503	12.1	75	-0.959738	54649991	47206813	46533096	58228981	63608142	55876226	50648371	50597750	56188267	50471514	46769275	49652874
Creatine	130.062	1.67	33	3.46296	5.15548e+07	4.87233e+07	5.16333e+07	5.71464e+07	5.65232e+07	5.46438e+07	5.34192e+07	5.24958e+07	5.34811e+07	6.11673e+07	6.50057e+07	5.89949e+07
5'-Phosphoribosyl-N-formylglycinamide	313.044	1.4	N/A	0.439698	804030	743936	849910	836687	756461	774931	523633	741191	650931	1.03739e+06	1.0443e+06	1.1184e+06
N-acetyl-L-aspartic acid	174.04	1.39	60	2.19302	1.48579e+08	1.37955e+08	1.51355e+08	1.02934e+08	1.03173e+08	1.01801e+08	2.31599e+08	2.26725e+08	2.40629e+08	1.97772e+08	2.12466e+08	1.81667e+08
PG(16:1/16:0)/PG(18:1/14:0)	719.486	12.09	80	1.14012	1.06419e+08	9.31284e+07	9.7591e+07	9.59812e+07	1.05875e+08	9.43703e+07	1.03381e+08	1.08383e+08	1.1431e+08	9.69278e+07	9.28926e+07	9.23677e+07
Taurine	124.007	1.56	30	3.60589	1.87688e+08	1.87321e+08	1.83364e+08	2.33565e+08	2.10286e+08	2.0385e+08	1.80765e+08	1.80595e+08	1.85108e+08	2.54844e+08	2.47421e+08	2.65277e+08
PG(18:2_22:6)-H	817.504	11.73	76	-0.535273	2.96394e+06	2.67525e+06	2.90084e+06	3.57924e+06	3.54437e+06	3.07355e+06	5.23528e+06	5.53269e+06	6.48985e+06	3.99977e+06	3.95594e+06	3.84311e+06
Hypotaurine	108.012	1.57	18	5.36201	5.73727e+06	5.2601e+06	5.12875e+06	6.14127e+06	5.90384e+06	5.77834e+06	5.95636e+06	6.25363e+06	6.44989e+06	7.70859e+06	7.66963e+06	8.16798e+06
PG(17:1_14:0)-H	705.472	11.98	73	-0.298385	3.94636e+06	3.53538e+06	3.95215e+06	4.80466e+06	5.29819e+06	4.76761e+06	3.35746e+06	3.58326e+06	3.63167e+06	3.76679e+06	3.58025e+06	3.73328e+06
PG(17:1_16:1)-H	731.487	12	80	0.379555	1540509	1374712	1438125	1984050	2433863	1802577	1809548	1994749	2042438	1947524	1796870	1748075
PG(20:5_18:2)/PG(20:4_18:3)-H	791.488	11.67	40	-0.791978	4.6066e+06	4.2192e+06	4.79612e+06	4.74566e+06	5.08354e+06	4.40026e+06	8.68743e+06	8.28326e+06	9.43842e+06	7.08172e+06	6.73082e+06	6.12565e+06
PG(16:0_22:5)-H	795.519	11.94	66	-0.610154	1.36859e+07	1.15544e+07	1.30773e+07	1.35699e+07	1.5539e+07	1.35267e+07	2.81046e+07	2.92697e+07	3.21086e+07	1.90916e+07	1.92645e+07	1.79375e+07
PG(18:0_20:4)-H	797.535	12.01	72	-1.30561	3.62188e+07	3.1741e+07	3.54025e+07	4.11981e+07	4.82482e+07	4.01899e+07	3.65989e+07	3.86642e+07	4.29722e+07	3.66205e+07	3.37487e+07	3.19864e+07
PG(18:1_20:4)-H	795.518	11.93	80	0.294915	1.36859e+07	1.15692e+07	1.31198e+07	1.35961e+07	1.5539e+07	1.35435e+07	2.83506e+07	2.9485e+07	3.21086e+07	1.90916e+07	1.93608e+07	1.80546e+07
N-Acetylglutamic acid	188.056	1.41	79	-0.263536	1.20469e+07	1.15314e+07	1.2081e+07	7.92935e+06	7.95343e+06	7.74572e+06	2.27976e+07	2.22054e+07	2.41396e+07	1.73729e+07	1.91992e+07	1.61439e+07
N-Acetyl-alpha-D-glucosamine 1-phosphate/N-acetyl-D-glucosamine-6-phosphate/N-Acetyl-D-mannosamine 6-phosphate	300.049	1.4	30	-0.00834889	1.94872e+07	1.72027e+07	2.00837e+07	1.54204e+07	1.44655e+07	1.45721e+07	3.57467e+07	3.686e+07	3.77383e+07	2.80366e+07	2.98478e+07	2.62477e+07
LPA(16:0)-H(predicted)	409.236	11.53	71	-0.388024	9.53747e+06	8.64228e+06	9.31786e+06	1.08706e+07	1.13098e+07	9.76022e+06	1.29348e+07	1.28091e+07	1.3284e+07	1.36041e+07	1.38613e+07	1.333e+07
PG(17:1_18:2)-H	757.503	11.89	86	-0.0576411	8.37229e+06	6.8302e+06	8.34326e+06	9.5824e+06	1.03409e+07	9.257e+06	6.74694e+06	6.7062e+06	7.38868e+06	5.62792e+06	5.34781e+06	4.95313e+06
L-Phenylalanine	164.071	6.29	38	2.37196	52421850	49561116	54138802	39502981	36040715	34533343	44826113	47442183	49662015	28150458	30477007	26070926
Ureidosuccinic acid	175.036	1.38	N/A	2.66811	691519	562928	780997	1.32904e+06	1.18207e+06	1.25288e+06	805546	734405	808066	1.69793e+06	1.82593e+06	1.57052e+06
LPG(16:0)-H	483.273	10.27	52	-0.608189	4.18229e+06	3.741e+06	4.4482e+06	5.40097e+06	5.43077e+06	4.93042e+06	6.34066e+06	6.98767e+06	6.4836e+06	9.81807e+06	1.02534e+07	9.19271e+06
Saccharopine	275.125	1.45	89	0.553229	4.67075e+06	4.52155e+06	4.3321e+06	4.6942e+06	4.87341e+06	4.80006e+06	9.26154e+06	8.9176e+06	8.8513e+06	1.31956e+07	1.28599e+07	1.18196e+07
PG(18:3_18:2)-H	767.488	11.89	43	-2.14078	1241842	1186355	1174732	1169054	1566789	1278469	1347284	1261720	1514469	1196746	1288057	1198050
PG(18:3_22:6)-H	815.488	11.57	47	-0.143664					115686		431916	447597	432070	265355	244622	228624
PG(19:1_16:0)-H	761.535	12.21	67	-0.922676	19194889	17093159	17651568	26557770	32467633	26283010	13320679	14905880	16351570	15968273	15315628	16343082
PG(19:1_18:1)-H	787.55	12.22	40	0.116879	1.40833e+07	1.37403e+07	1.35886e+07	1.74072e+07	2.13028e+07	1.78695e+07	1.3349e+07	1.45952e+07	1.62603e+07	1.39911e+07	1.32396e+07	1.35165e+07
PG(19:1_18:2)-H	785.535	12.11	58	-1.13153	1.64277e+07	1.46789e+07	1.50317e+07	2.21741e+07	2.53463e+07	2.17837e+07	1.22139e+07	1.27494e+07	1.47159e+07	1.25966e+07	1.20248e+07	1.19108e+07
PG(19:1_18:3)-H	783.519	11.9	32	0.280171	3.75766e+06	3.26504e+06	3.67182e+06	5.28883e+06	5.72423e+06	5.03751e+06	4.05312e+06	4.3729e+06	4.74839e+06	3.85708e+06	3.83221e+06	3.44304e+06
PG(19:1_19:1)-H	801.566	12.32	36	-0.177481	1.32024e+07	1.32234e+07	1.24287e+07	1.42585e+07	1.8082e+07	1.55148e+07	1.28067e+07	1.39912e+07	1.63147e+07	1.32999e+07	1.22492e+07	1.30949e+07
PG(20:2_18:2)-H	797.535	12	80	-1.31815	3.62188e+07	3.1741e+07	3.54025e+07	4.11981e+07	4.82482e+07	4.01899e+07	3.65989e+07	3.86642e+07	4.29722e+07	3.66205e+07	3.37487e+07	3.19864e+07
Eicosapentaenoic acid(20:5)	301.217	10.12	30	2.65726	170106	128105	181971	120245	104368	120121	305337	316056	344560	253755	251543	225918
Arachidonic acid(20:4)	303.233	10.54	58	0.371806	1875256	1672524	1978527	1625420	1381755	1319240	3593202	3807554	3978438	3029977	3038591	2626344
PG(20:5_22:6)-H	839.49	11.55	67	2.992	395107	406294	48998	23160	439218	8073	297227	298405	373475	141067	93722	132733
LPG(18:0)-H	511.304	10.71	58	-0.36241	826548	741994	866063	1.06203e+06	1.06002e+06	911876	1.67181e+06	1.76808e+06	1.80356e+06	2.30725e+06	2.50858e+06	1.96795e+06
PG(18:1_22:4)-H	823.552	12.05	56	-4.00378	3.32878e+06	2.81812e+06	3.08267e+06	3.9874e+06	4.49735e+06	3.92737e+06	7.36922e+06	7.7628e+06	8.12151e+06	5.68275e+06	5.86077e+06	5.55603e+06
Phenaceturic acid	192.066	6.71	40	3.13658	4.11898e+06	3.75442e+06	4.46115e+06	6.72233e+06	6.40771e+06	5.94558e+06	3.91393e+06	4.1136e+06	4.07001e+06	7.21282e+06	7.4845e+06	6.50244e+06
PG(18:1_22:6)-H	819.52	11.87	74	-2.00556	7.83137e+07	6.52418e+07	7.80381e+07	7.86664e+07	8.61074e+07	7.17523e+07	1.88402e+08	1.88363e+08	2.28209e+08	1.4544e+08	1.40477e+08	1.29721e+08
phosphocholine	182.058	1.45	20	2.24416	2.35046e+07	2.1958e+07	2.327e+07	3.31677e+07	3.4636e+07	3.48715e+07	5.16301e+07	5.2372e+07	4.82048e+07	5.41334e+07	5.29995e+07	5.26481e+07
Phosphocreatine	210.029	1.38	30	-0.131945	1.05954e+07	9.5125e+06	1.07961e+07	1.52127e+07	1.46885e+07	1.43897e+07	1.26644e+07	1.26702e+07	1.33183e+07	9.69517e+06	9.81216e+06	8.99424e+06
phosphoenol pyruvate	166.975	1.36	10	0.639875	319467	241199	334143	384208	355474	349112	352605	314950	257912	300529	230896	140020
Phospho-L-serine	184.001	1.54	N/A	3.49719	2.47068e+06	2.42792e+06	2.16635e+06	2.53767e+06	2.77256e+06	2.69249e+06	2.99434e+06	2.57212e+06	3.40872e+06	2.78235e+06	2.91525e+06	2.48964e+06
PG(22:5_18:2)-H	819.521	11.86	74	-3.57964	7.82886e+07	6.52418e+07	7.75884e+07	7.7946e+07	8.60656e+07	7.15711e+07	1.88344e+08	1.8833e+08	2.28122e+08	1.45305e+08	1.40373e+08	1.29488e+08
Phosphoric acid	96.9696	1.42	NA	-0.679763	427157026	415486383	452102084	445932553	452083200	420300680	487008322	448656437	418999137	496650888	539828509	417996884
PI(16:0_18:2)-H	833.52	12.01	88	-1.2157	6.74393e+07	6.88348e+07	7.38293e+07	6.37192e+07	8.69627e+07	6.73797e+07	3.64986e+07	3.9103e+07	4.12915e+07	3.90813e+07	3.2357e+07	4.00403e+07
PI(16:0_20:4)-H	857.521	11.99	100	-1.88245	4.90876e+07	4.8892e+07	4.97224e+07	4.76664e+07	6.27305e+07	5.14654e+07	7.0944e+07	7.90429e+07	8.49362e+07	6.92961e+07	6.31383e+07	7.24173e+07
PI(16:0_22:6)-H	881.52	11.85	81	-0.603947	1.19061e+07	1.15262e+07	1.17263e+07	1.23284e+07	1.54981e+07	1.29215e+07	1.20276e+07	1.31319e+07	1.46008e+07	1.21986e+07	1.12276e+07	1.26114e+07
PI(16:1_20:4)-H	855.507	11.84	82	-3.93251	5.33116e+06	5.1229e+06	5.15557e+06	5.71962e+06	6.58043e+06	5.48656e+06	8.68208e+06	9.30742e+06	1.0066e+07	8.40646e+06	7.2912e+06	8.70715e+06
PI(17:0_20:4)-H	871.536	12.11	72	-0.818609	7779291	8477100	8008665	8254784	11618648	9287336	7004842	8997090	9268220	7004515	6682330	7795171
PI(18:0_22:6)-H	909.55	12.15	80	0.390726	4.74878e+06	5.43898e+06	5.56391e+06	4.8974e+06	8.44743e+06	5.75517e+06	4.7666e+06	4.92129e+06	5.35096e+06	4.58034e+06	4.53987e+06	5.0375e+06
PI(18:1_20:4)-H	883.535	12	98	-0.773584	1.02779e+08	1.06668e+08	1.08235e+08	1.02897e+08	1.34987e+08	1.09552e+08	1.01307e+08	1.11653e+08	1.21272e+08	1.03299e+08	9.58436e+07	1.0715e+08
PI(18:2_20:4)-H	881.52	11.85	84	-0.603947	1.19061e+07	1.15262e+07	1.17263e+07	1.23284e+07	1.54981e+07	1.29215e+07	1.20276e+07	1.31319e+07	1.46008e+07	1.21986e+07	1.12276e+07	1.26114e+07
Pregnanediol	319.264	11.66	N/A	0.223079							116124	124482	138719		110204
Pyroglutamic acid	128.035	1.48	33	4.38729	2.55589e+08	2.46903e+08	2.55457e+08	2.12719e+08	1.97237e+08	1.9382e+08	1.47943e+08	1.4774e+08	1.53566e+08	1.54546e+08	1.55242e+08	1.42313e+08
Pyrophosphate	176.936	1.42	33	-0.435406	2.61655e+07	2.55202e+07	2.87213e+07	2.63185e+07	2.3487e+07	2.29909e+07	2.38558e+07	2.1022e+07	1.88678e+07	2.55163e+07	2.95793e+07	1.75617e+07
Pyrrolidonecarboxylic acid	128.035	1.48	NA	0.091585	2.55589e+08	2.46903e+08	2.55457e+08	2.12719e+08	1.97237e+08	1.9382e+08	1.47943e+08	1.4774e+08	1.53566e+08	1.54546e+08	1.55242e+08	1.42313e+08
Pyruvic acid	87.0088	1.56	15	1.13039	9071412	8215657	10040779	10033736	8899978	8388457	8176961	8681962	8477344	8450054	8756243	7532631
Retinoic acid	299.202	9.93	N/A	0.29622	2.3267e+06	1.83242e+06	2.21783e+06	2.48165e+06	2.98037e+06	2.31634e+06	2.17978e+06	1.87446e+06	2.47285e+06	4.37655e+06	2.08602e+06	1.85491e+06
ribose 5-phosphate	229.011	1.4	38	1.91694	3.78862e+06	3.68707e+06	3.91583e+06	4.44904e+06	4.22039e+06	3.79804e+06	4.87899e+06	3.34352e+06	3.09389e+06	4.96705e+06	5.19245e+06	3.77233e+06
Ricinoleic acid	297.244	10.59	10	0.122565	3085245	2890210	3195025	2730011	3071261	2951196	1989776	3297431	2217187	2102797	2414278	2791905
S-(1,2-DICARBOXYETHYL)GLUTATHIONE	422.087	1.3	72	0.750991	990761	1.30761e+06	1.31638e+06	2.38018e+06	2.75702e+06	1.21591e+06	585045	920564	556043	2.3673e+06	2.66729e+06	1.78731e+06
Citrulline	174.088	1.59	30	2.95335	1.15615e+06	1.09294e+06	1.36749e+06	1.00452e+06	807296	951229	3.23868e+06	3.37194e+06	3.75974e+06	2.65093e+06	2.49303e+06	2.48046e+06
S-Adenosylhomocysteine	383.114	6.32	40	0.424327	1.35035e+06	1.35329e+06	1.51521e+06	1.38621e+06	1.29786e+06	1.1678e+06	1.42263e+06	1.50061e+06	1.63894e+06	1.60005e+06	1.73901e+06	1.55112e+06
LPG(22:6)-H	555.274	9.96	49	-1.33242	319056	296267	331834	416489	409768	354033	935487	1.03166e+06	1.00465e+06	629902	681524	637856
Sedoheptulose 7-phosphate	289.033	1.38	42	0.210643	4.19498e+06	3.88624e+06	4.09377e+06	6.37161e+06	6.22531e+06	5.84415e+06	5.71516e+06	5.18595e+06	4.6456e+06	7.20908e+06	6.72728e+06	5.43302e+06
PG(18:1_22:5)-H	821.536	11.95	83	-1.97598	9.40167e+06	7.37407e+06	8.14753e+06	8.84758e+06	9.28816e+06	8.31345e+06	2.64775e+07	2.40212e+07	2.85076e+07	1.60669e+07	1.75361e+07	1.51666e+07
Stearic acid(18:0)	283.264	13.11	33	-0.721181	3283169779	2488334012	2787452610	2593969170	3278086550	2486072931	1600703634	1924536984	1892218934	2149219863	2245362600	1820382938
succinate	117.019	1.39	20	4.0935	175015386	160750023	183041065	172517134	176310541	159791887	144764782	144753911	145396538	188353088	203621697	173400519
succinate semialdehyde	101.024	1.39	38	4.89972	4776237	4333890	4840695	4474866	4596230	4301961	5971658	6125263	6129264	4712235	5018531	4455924
Sucrose	341.109	1.76	NA	0.0658067	3.9305e+06	2.09835e+06	4.37255e+06	2.35935e+06	2.27889e+06	1.76299e+06	2.34166e+06	2.23275e+06	2.04872e+06	3.22152e+06	2.29802e+06	1.76333e+06
Sulfate	96.9601	1.4	5	1.49964	10608197	9518147	11883009	10606809	10524893	9841977	8973435	6566052	7392814	10624845	11230768	6283370
PG(18:0_22:6)-H	821.536	11.92	62	-2.39217	8.18092e+06	7.37407e+06	8.14753e+06	8.53679e+06	9.28816e+06	8.31345e+06	2.3784e+07	2.40212e+07	2.85076e+07	1.60669e+07	1.75217e+07	1.51666e+07
PG(18:2_20:4)-H	793.503	11.86	41	-0.50888	9.70576e+06	8.46673e+06	1.006e+07	9.03839e+06	1.01754e+07	8.50999e+06	2.91558e+07	3.05869e+07	3.57565e+07	2.2588e+07	2.12951e+07	2.09978e+07
Tetradecanedioic acid	257.176	8.78	20	0.601535	806476	792044	880190	758083	714908	683009	666409	632942	663098	657372	655581	611930
PG(16:0_22:6)-H	793.504	11.86	79	-0.773529	9.70576e+06	8.46673e+06	9.95476e+06	9.01993e+06	1.01754e+07	8.50999e+06	2.91558e+07	3.05869e+07	3.57565e+07	2.2588e+07	2.12951e+07	2.08958e+07
Thr-Asp	233.077	1.72	10	4.64537	619866	637517	627519	704792	619899	537412	384351	365754	402684	527859	501358	485303
Threonic acid	135.03	1.49	14	-0.378315	102398066	95811707	91484758	85374913	95182365	89392046	64297075	59029075	61901996	82647551	88512706	71523834
Thymidine	241.082	6.44	18	2.48852	345662	366743	365487	351524	321892	324483	360549	407872	421580	394949	400567	396976
thymidine-5'-diphospho-alpha-d-glucose	563.068	1.43	N/A	1.30748	389562	274738	164662	156249	509452	562123	1.23215e+06	934372	870142	1.03202e+06	1.10344e+06	957802
trans-4-hydroxyproline	130.05	1.58	76	3.79728	2.20888e+07	2.13847e+07	2.30124e+07	1.03627e+07	1.19841e+07	1.18627e+07	9.87063e+06	1.03256e+07	1.06789e+07	1.11335e+07	9.05892e+06	7.88514e+06
trans-aconitate	173.009	1.34	52	2.68105	3.21871e+06	2.80009e+06	3.53175e+06	3.35473e+06	3.30312e+06	2.95068e+06	3.84279e+06	3.61678e+06	3.44439e+06	4.12147e+06	4.78613e+06	3.35714e+06
trehalose	341.108	1.75	57	1.61957	3.9305e+06	2.09835e+06	4.37255e+06	2.35935e+06	2.27889e+06	1.76299e+06	2.34166e+06	2.23275e+06	2.04872e+06	3.22152e+06	2.29802e+06	1.76333e+06
Tridecylic acid(C13:0)	213.185	9.73	41	2.72348	5.50066e+06	6.45881e+06	5.82072e+06	5.37826e+06	7.04841e+06	5.12473e+06	4.20467e+06	4.49587e+06	4.44605e+06	4.38178e+06	4.36681e+06	4.44553e+06
Undecanoic acid(11:0)	185.155	8.89	10	-0.0345479	2.26107e+06	2.7293e+06	2.19503e+06	2.90752e+06	1.68837e+06	1.60709e+06	1.65811e+06	1.48621e+06	1.53156e+06	1.3117e+06	1.25661e+06	1.09642e+06
Uracil	111.019	2.37	33	4.70517	9482741	8727031	9596003	8156522	8240796	8118674	14372899	14367128	13900138	12406861	13930481	10803638
PG(22:5_20:4)-H	843.52	11.79	65	-1.30763	713864	699243	651723	949682	950568	811876	2.75255e+06	2.77748e+06	3.09304e+06	1.82291e+06	1.91234e+06	1.80452e+06
Uridine	243.062	2.94	54	1.97818	10669070	9629677	11168136	7452552	6772191	6154550	7080490	7202789	7986908	6779865	7681077	6327878
Uridine 5'-diphosphate	402.995	1.37	59	0.206031	3.31743e+06	3.54336e+06	3.78715e+06	3.66451e+06	3.41357e+06	3.48434e+06	3.35229e+06	2.98129e+06	2.61034e+06	3.92859e+06	4.10216e+06	2.84382e+06
Uridine 5'-diphosphogalactose	565.047	1.42	80	1.19603	2.1179e+07	2.1338e+07	2.17103e+07	2.07746e+07	2.20331e+07	2.16963e+07	1.89836e+07	1.64604e+07	1.47699e+07	2.0789e+07	2.15201e+07	1.5434e+07
uridine 5'-diphosphoglucose	565.047	1.42	80	1.19603	2.1179e+07	2.1338e+07	2.17103e+07	2.07746e+07	2.20331e+07	2.16963e+07	1.89836e+07	1.64604e+07	1.47699e+07	2.0789e+07	2.15201e+07	1.5434e+07
uridine 5'-diphosphoglucuronic acid	579.027	1.32	70	1.62507	1.60923e+06	1.49716e+06	1.78628e+06	2.19241e+06	2.07886e+06	2.03762e+06	4.05817e+06	2.73112e+06	2.98344e+06	4.84013e+06	4.65852e+06	2.65238e+06
uridine 5'-diphospho-N-acetylgalactosamine	606.074	1.44	100	1.1629	1.43912e+08	1.47278e+08	1.44602e+08	1.39172e+08	1.73025e+08	1.6806e+08	3.21743e+08	2.62852e+08	2.2337e+08	2.997e+08	2.97408e+08	2.25996e+08
Uridine 5'-diphospho-N-acetylglucosamine	606.074	1.46	80	1.09691	1.43912e+08	1.47278e+08	1.44602e+08	1.39172e+08	1.73025e+08	1.6806e+08	3.21743e+08	2.62852e+08	2.2337e+08	2.997e+08	2.97408e+08	2.25996e+08
PG(20:4_22:6)-H	841.504	11.68	69	-1.65478	199653	137881	180523	179213	130490	187744	1277815	1296326	1466807	724947	665320	591459
Urocanic acid	137.035	2.46	21	-0.126585	685205	251217	1320671	1146723	1966455	698072	363797	355267	1134582	435664	169947	1168433
Valproic acid(8:0)	143.108	7.66	50	-0.365996	5.19806e+06	5.29578e+06	5.30147e+06	5.56459e+06	5.53229e+06	4.53542e+06	4.09971e+06	4.3101e+06	4.33508e+06	4.12516e+06	4.9807e+06	4.45951e+06
Xanthine	151.026	1.74	30	3.14117	6.50583e+06	5.16727e+06	5.37575e+06	4.24774e+06	4.04949e+06	4.20154e+06	1.06849e+07	1.04499e+07	1.01685e+07	5.71327e+06	5.57236e+06	5.00197e+06

## Sheet: Supplementary Table S3
Supplementary Table S3.Quantification of metabolites in the positive ion mode
Compound Name	m/z (Expected)	RT	Library Score (%)	m/z (Delta (ppm))	m/z (Expected)	RT	Library Score (%)	m/z (Delta (ppm))	1ul-pos-13	1ul-pos-14	1ul-pos-15	1ul-pos-16	1ul-pos-17	1ul-pos-18	1ul-pos-19	1ul-pos-20	1ul-pos-21	1ul-pos-22	1ul-pos-23	1ul-pos-24
Asp-Pro	231.099	11.22	70	-3.64373	257.114	3.76	75	-2.07323	6187510	6279699	7366205	6269656	6052959	6401943	321187	299630	932531	421528	362408	793872
EDTA(Chemical)	293.098	11.49	86	-1.52575	335.074	12.83	70	-1.30402	1534579	2180721	2675734	802639	799496	604678	N/F	N/F	N/F	313713	211756	N/F
Hexanoylglycine	174.113	1.08	20	-2.50268	338.342	0.83	98	-0.331209	1.87062e+07	3.01975e+07	2.26366e+07	8.7017e+06	3.86329e+07	3.77725e+07	4.92456e+06	6.34894e+06	5.78436e+06	3.03981e+07	6.48215e+06	4.99927e+06
N-acetylleucine	174.113	1.08	20	-2.50268	102.055	10.91	32	-0.946447	1.87062e+07	3.01975e+07	2.26366e+07	8.7017e+06	3.86329e+07	3.77725e+07	4.92456e+06	6.34894e+06	5.78436e+06	3.03981e+07	6.48215e+06	4.99927e+06
N-Acetylornithine	175.108	10.46	86	1.00191	282.12	9.13	33	-1.42229	8.75735e+07	8.09862e+07	1.01698e+08	4.30429e+07	3.61778e+07	3.33281e+07	2.5418e+07	2.58008e+07	2.62238e+07	1.41206e+07	1.3808e+07	1.08957e+07
Inosine	269.089	6.47	20	-1.40277	137.071	6.72	75	0.0378975	7.74207e+06	8.04566e+06	9.05826e+06	2.35885e+06	2.41577e+06	2.27281e+06	2.52333e+06	2.52383e+06	2.74977e+06	1.20942e+06	1.5597e+06	1.25246e+06
Prenyl-L-cysteine	190.09	1.84	100	-2.58781	496.34	6.34	100	-0.523305	17756057	17226481	18984496	14898319	16639540	13967634	3060163	5292111	8854965	2412604	2701153	3261365
L-Kynurenine	209.093	8.43	47	-1.72899	104.071	9.63	90	4.14245	4.29205e+06	4.57499e+06	4.81062e+06	2.43579e+06	2.09054e+06	1.93908e+06	1.49819e+06	1.84059e+06	1.75758e+06	962589	1.05121e+06	1.00557e+06
Deoxycytidine	228.098	10.2	30	2.00893	244.154	5.34	40	0.549446	1637772	1787382	2189338	879699	341007	900862	396138	N/F	247869	187995	398971	449955
N-Acetyl-L-alanine	132.066	10.24	33	10.6555	388.306	3.92	68	-1.18863	4.84678e+07	3.64608e+07	3.90004e+07	2.00976e+07	1.93809e+07	1.92006e+07	1.69947e+07	1.70537e+07	1.35191e+07	1.09059e+07	1.0667e+07	1.11893e+07
Hypoxanthine	137.046	3.88	68	-3.41664	96.0444	13.43	31	5.19169	1.07718e+09	1.0471e+09	1.13104e+09	3.64399e+08	3.49563e+08	3.45431e+08	4.38763e+08	4.39914e+08	4.50351e+08	1.56325e+08	1.51685e+08	1.45522e+08
Ala-Asp	205.083	11.22	42	-4.28166	246.171	4.72	90	-2.4482	4130475	4134504	4345404	2949262	2804564	2486782	1607791	1277027	1138688	1141666	1324313	771874
D-Glutamylglycine	205.082	11.22	30	1.03326	104.071	9.63	90	-0.854155	4130475	4134504	4345404	2949262	2804564	2486782	1607791	1277027	1138688	1141666	1324313	771874
His-Ala	227.115	11.38	41	-4.12115	123.045	9.63	92	-2.6492	1118178	1041171	1266266	381694	342931	246638	N/F	N/F	N/F	337254	306790	235545
2-Aminobenzoic acid/p-Aminobenzoic acid	138.055	8.85	46	0.806494	416.338	3.53	87	-0.91455	170366866	161590455	177981001	165131940	171592974	150460715	70679701	74401846	72299899	102697899	104038926	90380372
4-aminobenzoate	138.055	8.85	46	-3.03255	262.165	8.57	73	0.562243	170366866	161590455	177981001	165131940	171592974	150460715	70679701	74401846	72299899	102697899	104038926	90380372
L-cysteine	122.028	9.86	91	-2.04076	104.071	9.63	90	-0.854155	2730589	3073994	2878426	2125964	1880814	2088177	1722954	455662	672956	1219075	1016759	595180
Anthranilate	138.055	8.85	NA	-3.03255	146.092	8.71	81	0.612728	170366866	161590455	177981001	165131940	171592974	150460715	70679701	74401846	72299899	102697899	104038926	90380372
LPC(16:1e)	480.345	5.93	79	0.37608	190.05	0.8	33	-2.4346	2.96966e+08	3.23145e+08	3.30344e+08	2.63787e+08	2.61424e+08	2.38641e+08	6.72897e+08	7.21952e+08	7.12506e+08	4.21102e+08	4.07317e+08	3.81865e+08
Trigonelline	138.055	8.85	46	-3.03255	123.044	9.63	92	1.57692	170366866	161590455	177981001	165131940	171592974	150460715	70679701	74401846	72299899	102697899	104038926	90380372
Linoleyl carnitine, Linoelaidyl carnitine; acylcarnitine C18:2	424.342	1.89	98	-0.105741	134.06	0.79	30	0.584427	8.18795e+06	7.93071e+06	8.8664e+06	5.75907e+06	5.73793e+06	4.59803e+06	3.89273e+06	3.99091e+06	3.83446e+06	3.28476e+06	3.34462e+06	3.02423e+06
Aspartic Acid	134.045	11.4	75	1.1072	110.071	11.94	85	3.37644	1.98844e+08	1.89512e+08	2.13421e+08	2.01191e+08	2.11347e+08	2.42109e+08	7.93152e+07	8.13593e+07	8.40769e+07	4.20801e+07	1.00881e+08	8.8372e+07
L-Aspartic acid	134.045	11.47	57	-2.84669	115.051	10.19	40	-2.88205	1.98844e+08	1.89512e+08	2.13421e+08	2.01191e+08	2.11347e+08	2.42109e+08	7.93152e+07	8.13593e+07	8.40769e+07	4.20801e+07	1.00881e+08	8.8372e+07
Cys-Glu	251.07	11.22	90	-2.02622	176.071	1.53	30	0.105496	2.07321e+07	1.94492e+07	2.07863e+07	1.60069e+07	1.46839e+07	1.41638e+07	9.54381e+06	1.02125e+07	9.09376e+06	1.12616e+07	1.22825e+07	1.10862e+07
Gamma-Glutamylcysteine	251.07	11.22	90	0.164403	219.098	10.88	63	-0.0348975	2.07321e+07	1.94492e+07	2.07863e+07	1.60069e+07	1.46839e+07	1.41638e+07	9.54381e+06	1.02125e+07	9.09376e+06	1.12616e+07	1.22825e+07	1.10862e+07
Glu-Cys	251.07	11.22	44	-2.02622	298.097	1.8	89	-1.94947	2.07321e+07	1.94492e+07	2.07863e+07	1.60069e+07	1.46839e+07	1.41638e+07	9.54381e+06	1.02125e+07	9.09376e+06	1.12616e+07	1.22825e+07	1.10862e+07
N-Acetylputrescine	131.118	8.17	74	0.922298	130.05	10.91	60	-2.79099	8390955	7845863	8874169	2494129	2732847	2773889	4298610	3829216	4659233	1645872	1966619	1739300
Cytarabine	244.093	10.52	10	7.01311	391.284	0.8	51	-0.323705	39095344	36163493	47561436	31142718	27878692	24919934	23258885	20941786	21857706	16130601	15073205	12893924
N?-Acetyl-L-lysine	189.123	10.43	71	0.547665	440.373	1.8	79	0.0626325	1.31287e+07	1.26881e+07	1.14509e+07	1.12518e+07	9.61622e+06	9.25005e+06	9.06678e+06	9.20476e+06	5.61413e+06	3.78171e+06	6.78029e+06	5.72211e+06
N-Alpha-acetyllysine	189.123	10.29	50	0.547665	454.389	1.78	69	0.16639	1.31287e+07	1.26881e+07	1.14509e+07	1.12518e+07	9.61622e+06	9.25005e+06	9.06678e+06	9.20476e+06	5.61413e+06	3.78171e+06	6.78029e+06	5.72211e+06
Cytidine	244.093	10.52	10	4.88276	268.104	4.13	70	0.402701	39095344	36163493	47561436	31142718	27878692	24919934	23258885	20941786	21857706	16130601	15073205	12893924
allothreonine	120.066	10.44	71	-2.0898	348.07	11.16	53	-0.09576	7.79858e+08	7.38755e+08	8.90924e+08	6.00639e+08	5.36691e+08	5.23583e+08	4.37699e+08	4.2464e+08	4.43954e+08	3.41473e+08	3.28137e+08	2.84402e+08
pterin	164.057	4.42	41	-2.26811	428.037	12.76	81	0.949208	10439054	9940689	11073724	7171940	7439870	7058961	5563365	5476449	5838350	5089205	5538487	3497279
3-Hydroxy-9-hexadecenoylcarnitine	414.322	3.6	80	1.87716	246.157	12.07	70	-3.64812	2714012	2606398	3063283	1498540	1365104	1288093	2289478	2203332	2271100	1192267	1471134	1173790
C16:1-OH carnitine	414.322	3.6	80	1.87716	219.098	10.88	40	-2.54519	2714012	2606398	3063283	1498540	1365104	1288093	2289478	2203332	2271100	1192267	1471134	1173790
Asp-Gly	191.067	11.35	35	-3.96292	227.115	11.96	47	-4.12115	3.74571e+06	3.55405e+06	5.0261e+06	3.40465e+06	3.38733e+06	3.33702e+06	2.36483e+06	1.56501e+06	1.19007e+06	2.45081e+06	1.65462e+06	1.53804e+06
Gly-Asp	191.067	11.35	81	-3.96292	120.066	10.44	71	-2.0898	3.74571e+06	3.55405e+06	5.0261e+06	3.40465e+06	3.38733e+06	3.33702e+06	2.36483e+06	1.56501e+06	1.19007e+06	2.45081e+06	1.65462e+06	1.53804e+06
N-alpha-acetyl-L-asparagine	175.072	9.72	69	-3.33898	219.098	10.82	72	-2.54519	3100662	3263195	3697751	3682078	3872961	3797218	1331334	1205139	1418311	1499751	1698194	1488699
homoserine	120.066	10.44	71	-2.0898	246.157	12.06	45	-3.64812	7.79858e+08	7.38755e+08	8.90924e+08	6.00639e+08	5.36691e+08	5.23583e+08	4.37699e+08	4.2464e+08	4.43954e+08	3.41473e+08	3.28137e+08	2.84402e+08
L-threonine	120.066	10.44	71	2.24116	291.13	13.06	90	0.782648	7.79858e+08	7.38755e+08	8.90924e+08	6.00639e+08	5.36691e+08	5.23583e+08	4.37699e+08	4.2464e+08	4.43954e+08	3.41473e+08	3.28137e+08	2.84402e+08
Octadecylamine	270.316	1.61	30	-0.278357	134.045	11.4	75	1.1072	2.4615e+06	1.53634e+06	1.98099e+06	3.01325e+06	2.65252e+06	1.53618e+06	1.13675e+06	1.326e+06	895782	1.07185e+06	1.10055e+06	755284
3-Hydroxy-11Z-octadecenoylcarnitine	442.353	3.25	100	1.63286	249.073	11.93	78	-3.55602	8033039	6784324	8412807	3932791	4347943	3520637	6062305	5509599	5247523	3568884	4423614	3426863
C18:1-OH carnitine	442.353	3.25	100	1.63286	191.067	11.35	35	-3.96292	8033039	6784324	8412807	3932791	4347943	3520637	6062305	5509599	5247523	3568884	4423614	3426863
AcylCarnitine(20:2)	452.373	1.8	72	-0.746151	203.15	11.13	100	0.692221	1427872	1342170	1158496	971132	859225	760683	591341	684448	849849	419316	639328	902254
L-Threonine/L-Homoserine	120.066	10.44	61	2.24116	189.112	0.85	32	0.487586	7.79858e+08	7.38755e+08	8.90924e+08	6.00639e+08	5.36691e+08	5.23583e+08	4.37699e+08	4.2464e+08	4.43954e+08	3.41473e+08	3.28137e+08	2.84402e+08
methyl-L-histidine	170.093	11.74	96	-2.532	165.091	0.83	49	0.640126	207462920	185945345	234160847	140047725	127513113	131019576	126624389	118981278	137956057	115030429	106724002	94664656
alpha-aminoadipate	162.077	10.63	100	-2.75699	147.08	0.83	43	0.388881	73895403	70457970	78659103	132006957	120901699	114680265	41474714	41834810	41800412	84390117	83384774	72474967
N-Methyl-L-glutamate/2-Aminoadipic acid	162.076	10.63	100	0.513067	90.0555	10.23	100	-0.0196293	73895403	70457970	78659103	132006957	120901699	114680265	41474714	41834810	41800412	84390117	83384774	72474967
3-Methylhistidine	170.092	11.74	96	0.583942	118.087	8.34	100	-2.96734	207382230	185945345	234160847	140047725	127513113	131019576	126624389	118981278	137956057	115030429	106724002	94664656
Phytosphingosine	318.3	1.77	100	-0.492827	102.091	9.68	86	4.08282	6.18324e+08	4.40054e+08	6.52367e+08	5.78148e+08	4.45547e+08	1.00144e+09	4.07701e+08	2.92446e+08	2.76075e+08	7.16847e+08	3.25347e+08	2.68419e+08
Elaidic carnitine	426.358	1.86	99	-0.301919	664.117	12.76	93	0.199288	2.50214e+08	2.57996e+08	3.08043e+08	1.73044e+08	1.75851e+08	1.57152e+08	1.52981e+08	1.47824e+08	1.43212e+08	1.51656e+08	1.4127e+08	1.28213e+08
Vaccenyl carnitine	426.358	1.86	99	-0.301919	232.154	5.6	80	-0.494794	2.50214e+08	2.57996e+08	3.08043e+08	1.73044e+08	1.75851e+08	1.57152e+08	1.52981e+08	1.47824e+08	1.43212e+08	1.51656e+08	1.4127e+08	1.28213e+08
NADP	744.083	15.63	63	0.935836	227.114	11.96	80	-1.61141	2.24654e+06	1.72256e+06	1.9403e+06	3.1595e+06	2.212e+06	2.55787e+06	1.15357e+06	636857	805964	1.23192e+06	1.1313e+06	697884
D-Glucosamine 6-phosphate	260.053	12.18	29	0.92472	369.352	0.83	80	0.635824	42242227	40282077	45096278	45994711	42257575	40632331	24920935	24794896	24646050	31550052	30371902	26827561
(S)-1-Pyrroline-5-carboxylate/1-Pyrroline-2-carboxylic acid	114.055	10.23	NA	3.22665	104.107	4.52	85	2.95489	2908254	2273266	3229600	1732958	2181001	1921613	1436624	1940410	1682476	1915219	1296234	3358413
AcylCarnitine(17:1)	412.342	1.88	83	-0.0761732	489.115	13.15	100	1.07153	15785817	17003408	19410917	13325177	13701123	11865436	10858933	9851929	9408959	10111726	8716000	8610728
AcylCarnitine(13:0)	358.295	1.96	N/A	0.00302357	176.103	10.98	100	-2.37962	10713381	8392203	12859096	11768877	12321819	10266467	4756376	4632598	3933362	7328289	4862358	4637616
Pro-Asn	230.115	10.99	37	-3.83166	132.077	10.2	72	-4.04937	6.46409e+06	6.32829e+06	8.02483e+06	5.21561e+06	5.08194e+06	4.88682e+06	4.80365e+06	4.62235e+06	4.22158e+06	3.93333e+06	4.03395e+06	3.0071e+06
3-hydroxy-N6,N6,N6-trimethyl-L-lysine	205.155	11.76	10	0.856167	114.067	3.95	80	-2.50526	1.95228e+08	1.85026e+08	2.19062e+08	1.28606e+08	1.10871e+08	1.1033e+08	1.25086e+08	1.24792e+08	1.2905e+08	1.10835e+08	1.06565e+08	9.98535e+07
6-Hydroxyhexanoic acid/Butoxyacetic acid	133.086	1.38	22	0.303475	364.065	12.02	54	0.509948	10338798	10815044	13217434	8653301	10930535	10756549	6307974	8062827	8302125	6954067	6061538	5850068
4-Pyrimidine Methanamine / 2-Aminomethylpyrimidine	110.071	11.94	85	3.37644	251.07	11.22	90	-2.02622	3.90961e+08	3.84014e+08	4.62992e+08	3.32696e+08	2.99395e+08	3.11056e+08	2.52796e+08	2.57929e+08	2.64321e+08	2.2739e+08	2.11917e+08	2.03409e+08
L-Histidine	156.077	11.92	80	-2.51069	179.05	11.18	76	-5.65106	1.35521e+09	1.32799e+09	1.53904e+09	1.12258e+09	1.00289e+09	1.02796e+09	9.01609e+08	8.53576e+08	9.63776e+08	7.54733e+08	7.07199e+08	6.51721e+08
trans-Hexadec-2-enoyl carnitine	398.327	1.96	95	-0.263309	179.049	11.18	73	-2.52344	8.13279e+07	8.51394e+07	9.60568e+07	5.36507e+07	5.09545e+07	4.56296e+07	5.76407e+07	5.67176e+07	5.65482e+07	4.0752e+07	3.9948e+07	3.43962e+07
Argininosuccinic acid	291.13	13.06	90	0.782648	489.115	13.12	100	0.00838857	5.61312e+06	5.33807e+06	6.39542e+06	3.38929e+06	3.14561e+06	2.9326e+06	4.16134e+06	3.59798e+06	3.75863e+06	2.74099e+06	2.58338e+06	2.32289e+06
L-Tyrosine	182.082	9.62	100	-1.91788	104.071	9.63	90	4.14245	2.27499e+08	2.08583e+08	2.28083e+08	1.90715e+08	1.92543e+08	1.74798e+08	1.5809e+08	1.60179e+08	1.61388e+08	1.3869e+08	1.28971e+08	1.20579e+08
3-Hydroxybenzaldehyde	123.045	9.63	92	-2.6492	316.248	2.55	65	-0.303947	2.95195e+07	2.86345e+07	3.05954e+07	2.55474e+07	2.62114e+07	2.37176e+07	2.22993e+07	2.06749e+07	2.12901e+07	1.72203e+07	1.74479e+07	1.45937e+07
4-Hydroxybenzaldehyde	123.044	9.63	92	1.57692	146.118	8.85	100	-3.9412	2.95195e+07	2.86345e+07	3.05954e+07	2.55474e+07	2.62114e+07	2.37176e+07	2.22993e+07	2.06749e+07	2.12901e+07	1.72203e+07	1.74479e+07	1.45937e+07
N-Acetyl-L-tyrosine	224.092	2.63	55	2.30871	268.104	4.13	59	0.402701	9225520	8859897	10112431	7272830	6713803	6197727	6816326	6585073	7537445	5983235	5140721	5253205
N-acetylhistidine	198.088	10.29	67	0.703858	428.037	12.76	81	-0.26564	6086307	5594282	8148875	6466000	5571874	6303275	4594551	4300251	3701662	4454983	4863106	4458965
LPS(18:1)	524.298	8.29	37	1.20686	261.038	12.82	65	-1.13464	3.31631e+06	2.97951e+06	3.23911e+06	2.93213e+06	2.73936e+06	2.32088e+06	1.78869e+06	2.32487e+06	1.33645e+06	1.66398e+06	1.68491e+06	2.07187e+06
L-Methionine	150.059	9.21	54	-2.59741	106.087	8.07	57	-1.43573	2.02626e+08	1.87833e+08	2.06274e+08	1.60814e+08	1.59421e+08	1.51363e+08	1.48185e+08	1.41849e+08	1.55401e+08	9.54202e+07	9.60584e+07	9.45523e+07
N-Acetylglutamine	189.087	9.63	80	0.47555	104.071	9.6	52	4.14245	13538504	12843484	13170050	11425798	11064018	10861627	8150834	7552181	7828419	8542262	7043560	7038174
L-Arginine	175.119	11.77	96	-2.38297	89.0709	1.36	36	5.74216	2.68001e+08	2.70287e+08	3.14948e+08	1.833e+08	1.70777e+08	1.77235e+08	2.84975e+08	3.19067e+08	3.08438e+08	2.36609e+08	2.26507e+08	2.32982e+08
4-Guanidinobutanoic acid	146.092	8.71	81	0.612728	428.373	1.82	81	0.401889	1.01516e+08	1.04703e+08	1.21861e+08	1.0888e+08	1.13322e+08	1.0419e+08	7.13036e+07	7.00651e+07	6.98284e+07	9.74979e+07	9.68083e+07	8.83855e+07
2-Aminobutyric acid	104.071	9.63	90	4.14245	344.28	2.26	70	-0.0255414	2.61812e+07	2.47428e+07	2.76e+07	1.87096e+07	1.90839e+07	1.72453e+07	1.64141e+07	1.58038e+07	1.6656e+07	1.61833e+07	1.62654e+07	1.30843e+07
3-aminoisobutanoate	104.071	9.63	90	-0.854155	356.352	1.63	81	-0.378751	2.61812e+07	2.47428e+07	2.76e+07	1.87096e+07	1.90839e+07	1.72453e+07	1.64141e+07	1.58038e+07	1.6656e+07	1.61833e+07	1.62654e+07	1.30843e+07
4-aminobutanoate	104.071	9.63	90	-0.854155	426.358	1.86	99	-0.301919	2.61812e+07	2.47428e+07	2.76e+07	1.87096e+07	1.90839e+07	1.72453e+07	1.64141e+07	1.58038e+07	1.6656e+07	1.61833e+07	1.62654e+07	1.30843e+07
D-Alpha-aminobutyric acid	104.071	9.63	90	4.14245	230.096	9.96	32	0.190142	2.61812e+07	2.47428e+07	2.76e+07	1.87096e+07	1.90839e+07	1.72453e+07	1.64141e+07	1.58038e+07	1.6656e+07	1.61833e+07	1.62654e+07	1.30843e+07
Dimethylglycine	104.071	9.6	52	4.14245	223.075	12.86	66	-1.99637	2.61812e+07	2.47428e+07	2.76e+07	1.87096e+07	1.90839e+07	1.72453e+07	1.64141e+07	1.58038e+07	1.6656e+07	1.61833e+07	1.62654e+07	1.30843e+07
Gama-Aminobutryic acid	104.071	9.6	79	4.14245	261.038	12.82	65	-1.13464	2.61812e+07	2.47428e+07	2.76e+07	1.87096e+07	1.90839e+07	1.72453e+07	1.64141e+07	1.58038e+07	1.6656e+07	1.61833e+07	1.62654e+07	1.30843e+07
L-Alpha-aminobutyric acid (homoalanine)	104.071	9.63	90	4.14245	261.038	12.82	65	-1.09633	2.61812e+07	2.47428e+07	2.76e+07	1.87096e+07	1.90839e+07	1.72453e+07	1.64141e+07	1.58038e+07	1.6656e+07	1.61833e+07	1.62654e+07	1.30843e+07
Inosine 5'-monophosphate (IMP, Inosinic acid)	349.055	11.46	30	-0.977238	104.071	9.6	79	4.14245	1.03007e+07	1.08631e+07	1.32503e+07	8.18551e+06	8.80286e+06	7.58504e+06	7.76046e+06	7.86246e+06	7.1469e+06	1.07304e+07	9.70392e+06	7.83877e+06
1H-Indole-4-carboxaldehyde	146.06	8.4	25	0.58249	251.07	11.22	90	0.164403	3.54956e+07	3.13088e+07	3.75634e+07	2.91207e+07	2.70607e+07	2.45335e+07	2.68358e+07	2.77301e+07	2.82832e+07	1.95814e+07	2.09695e+07	1.80426e+07
L-Valine	118.087	9.62	50	-2.96734	219.098	10.85	32	-2.54519	528718529	498863916	552204815	434216869	433847070	407433238	419713353	417695555	423798520	331972469	329485198	302183918
(RS)-Mevalonic Acid	149.081	10.74	N/A	2.81452	261.038	12.82	65	-1.13464	4320781	4074189	5099692	6108943	5903864	4553541	3440723	2995170	4380118	2399070	1799499	2095471
L-Isoleucine	132.102	8.7	67	-3.22541	251.07	11.22	44	-2.02622	1561380133	1603851295	1852485017	1333277038	1356147792	1223935890	1362023909	1324711045	1350165608	963779935	985396506	863648201
2-quinolinecarboxylic acid	174.055	2.99	28	-2.55561	308.091	11.18	100	-0.84643	13110651	13525800	14468445	7002240	5776083	6476523	11844053	10035587	11270336	5142060	5030988	5532357
Indoleacrylic acid	188.071	8.38	96	0.507331	191.067	11.35	81	-3.96292	3.32541e+08	3.27138e+08	3.75053e+08	3.05988e+08	2.70636e+08	2.56287e+08	2.73625e+08	2.78014e+08	2.87516e+08	2.04518e+08	2.06078e+08	1.79213e+08
12-Hydroxy-12-octadecanoylcarnitine	444.369	3.23	N/A	-0.86146	258.11	10.8	80	-0.904455	8.51475e+06	8.8163e+06	9.85549e+06	6.48708e+06	6.4537e+06	5.86257e+06	1.58897e+07	1.52904e+07	1.55508e+07	1.16479e+07	1.34266e+07	1.11927e+07
octopamine	154.087	1.65	22	-3.46116	216.064	11.03	50	-2.01527	3.58875e+06	3.32726e+06	3.9077e+06	4.2972e+06	4.37153e+06	3.608e+06	2.15225e+06	1.93995e+06	1.81846e+06	2.30138e+06	2.05103e+06	2.04781e+06
L-tryptophan	205.098	8.39	40	-1.76849	76.0398	10.53	75	1.48804	2.20836e+08	2.16805e+08	2.49982e+08	2.00629e+08	1.77295e+08	1.63936e+08	1.83132e+08	1.8623e+08	1.89936e+08	1.35516e+08	1.37855e+08	1.20405e+08
L-Leucine	132.102	8.38	67	-3.22541	179.05	11.18	36	-5.65106	1.7076e+09	1.68422e+09	1.89974e+09	1.563e+09	1.38961e+09	1.27475e+09	1.42203e+09	1.46e+09	1.43775e+09	1.08017e+09	1.07976e+09	9.6936e+08
N-(3-acetamidopropyl)pyrrolidin-2-one	185.128	11.34	N/A	-0.696995	118.062	10.32	84	-1.71961	1.51844e+08	1.40646e+08	1.45821e+08	9.76804e+07	8.92264e+07	8.72807e+07	1.1253e+08	1.09371e+08	1.17226e+08	9.5204e+07	8.63424e+07	8.79276e+07
Cyclic CMP	306.049	10.49	29	0.251882	364.066	12.02	54	-0.918365	436742	335617	410394	357011	251839	333886	204886	155302	214035	297869	242606	195073
Ergothioneine	230.096	9.96	32	0.190142	414.358	1.88	80	-0.155473	2.53162e+06	2.21035e+06	2.1334e+06	2.24932e+06	1.8325e+06	1.55127e+06	1.88608e+06	1.96674e+06	2.07665e+06	1.18259e+06	1.55043e+06	1.54473e+06
Glycine	76.0398	10.53	75	1.48804	274.202	3.36	69	-1.82379	5.57156e+07	5.3971e+07	6.22276e+07	6.35359e+07	5.83007e+07	5.46239e+07	4.82447e+07	4.51359e+07	4.69773e+07	4.22161e+07	4.07651e+07	3.5827e+07
2-Pyrrolidinone	86.06	10.24	38	6.34887	260.186	3.88	86	0.258597	8918139	9542332	11028420	8204266	7830591	5420283	8377798	6815304	5584166	4535568	9335321	4580061
Adenine	136.062	3.52	64	-3.41643	120.066	10.44	71	-2.0898	277543885	268992115	294291936	211844868	200275736	200043425	447041217	442103440	448011844	343782556	368533580	348914396
5-Methoxytryptamine	191.118	4.93	11	0.604234	248.15	9.24	100	-1.63651	4.01001e+06	3.93309e+06	4.08537e+06	4.95635e+06	4.41636e+06	4.0491e+06	2.46059e+06	2.61482e+06	2.37013e+06	2.57372e+06	3.02127e+06	2.10157e+06
Glu-His	285.12	12.04	43	-0.120622	110.028	10.18	54	-1.56993	2802707	2797707	3537388	2757173	2457314	2180421	1366242	1355755	1506624	2303645	2020715	1522980
Palmityl-CoA	1006.35	10.29	93	1.38733	137.046	3.88	68	-3.41664	3.13388e+06	2.69342e+06	3.21311e+06	2.83299e+06	2.85885e+06	2.84221e+06	2.35349e+06	2.00383e+06	2.16756e+06	2.75053e+06	2.63207e+06	2.21562e+06
His-Glu	285.121	12.04	60	-3.94356	260.198	11.19	32	-4.22268	2802707	2797707	3537388	2757173	2457314	2180421	1366242	1355755	1506624	2303645	2020715	1522980
dopamine	154.087	3.65	22	-3.52606	118.065	0.91	74	2.43447	6085201	6894296	5915720	6773584	6113777	6536985	4133183	4447997	4096165	3888938	4333963	4016360
C-6 Ceramide	398.363	0.82	N/A	0.189669	176.071	1.53	30	-2.84785	3.39059e+06	3.69381e+06	4.32663e+06	3.89944e+06	4.15885e+06	3.91375e+06	2.18053e+06	2.29202e+06	2.82747e+06	2.52433e+06	3.0166e+06	2.13051e+06
PC(o34:2)	744.591	2	87	-0.781602	188.071	8.38	96	0.507331	1.10783e+09	1.01124e+09	9.35976e+08	8.32641e+08	9.57571e+08	9.20831e+08	7.10542e+08	8.42518e+08	7.64136e+08	7.2389e+08	6.88937e+08	6.7257e+08
PC(p34:1)	744.591	2	87	-0.781602	349.055	11.46	30	-0.977238	1.10783e+09	1.01124e+09	9.35976e+08	8.32641e+08	9.57571e+08	9.20831e+08	7.10542e+08	8.42518e+08	7.64136e+08	7.2389e+08	6.88937e+08	6.7257e+08
Pro-Glu	245.115	10.65	31	-5.35879	468.309	6.48	89	-0.416386	4044707	3884904	4493208	5364819	4406448	3928699	2622389	2569645	2796226	3139391	2844511	2570914
Ala-Gly	147.078	10.75	30	-7.1899	232.154	5.6	80	-0.796316	1176856655	1142640595	1312523267	1497480426	1413018170	1313216574	1020155970	970006693	990217107	791430154	794178786	712158725
N6,N6,N6-Trimethyl-L-lysine	189.16	11.45	49	-0.390448	291.236	2.98	70	0.569899	9.58492e+07	8.93689e+07	1.05546e+08	6.83875e+07	6.30269e+07	6.36739e+07	7.47652e+07	8.10598e+07	7.98379e+07	6.95314e+07	6.492e+07	6.69842e+07
PC(o34:1)	746.606	2.16	95	-1.17209	174.137	8.29	70	-2.50419	1.17265e+09	1.04544e+09	1.15744e+09	9.37991e+08	1.03012e+09	1.13011e+09	8.85516e+08	9.34124e+08	8.39328e+08	8.63101e+08	7.35103e+08	7.48374e+08
Linoleoyl Ethanolamide	324.29	0.88	N/A	0.0871021	210.129	8.39	80	0.544549	7.02418e+06	6.41462e+06	7.81654e+06	7.52862e+06	6.91927e+06	7.85731e+06	5.24114e+06	5.31509e+06	5.29823e+06	5.36427e+06	6.42659e+06	4.3818e+06
PC(p34:0)	746.606	2.09	90	-1.17209	204.123	8.14	62	-0.475306	1.17265e+09	1.04544e+09	1.15744e+09	9.37991e+08	1.03012e+09	1.13011e+09	8.85516e+08	9.34124e+08	8.39328e+08	8.63101e+08	7.35103e+08	7.48374e+08
N-Acetyl-5-hydroxytryptamine	219.113	2.78	50	0.106319	90.055	10.23	50	5.86566	6.35744e+06	6.12929e+06	7.05027e+06	6.03673e+06	5.40149e+06	5.99372e+06	4.82819e+06	4.65075e+06	5.16471e+06	6.22013e+06	6.8682e+06	5.60805e+06
N-Acetylserotonin	219.113	2.78	50	0.106319	104.071	9.63	90	4.14245	6.35744e+06	6.12929e+06	7.05027e+06	6.03673e+06	5.40149e+06	5.99372e+06	4.82819e+06	4.65075e+06	5.16471e+06	6.22013e+06	6.8682e+06	5.60805e+06
L-Glutamine	147.077	10.76	50	-3.3144	526.314	8.4	99	1.15888	1176856655	1142640595	1312523267	1497480426	1413011887	1313216574	1020155970	970006693	990217107	791430154	794178786	712158725
Asp-Asp	249.073	11.93	78	-3.55602	175.119	11.77	96	-2.38297	9.22618e+06	1.01176e+07	1.15343e+07	1.15574e+07	1.07543e+07	9.87021e+06	8.30683e+06	7.95941e+06	6.98415e+06	1.03234e+07	1.0549e+07	8.10545e+06
N-Palmitoylsphingosine	538.519	0.84	44	0.645166	133.061	10.9	59	-3.20144	1.33632e+07	1.18599e+07	9.84388e+06	1.35513e+07	1.61691e+07	1.39707e+07	9.52663e+06	1.25952e+07	1.2516e+07	8.28502e+06	6.89006e+06	9.42505e+06
Glu-Asp	263.088	11.47	70	-2.20862	134.045	11.47	57	-2.84669	3349837	2744391	3401469	2461297	2596959	2542587	2447496	1844147	1948043	2417724	2385316	1874810
L-Asparagine	133.061	10.9	59	-3.20144	369.352	0.83	80	0.635824	8.67315e+07	8.53676e+07	9.61294e+07	8.48122e+07	7.76503e+07	7.556e+07	7.32418e+07	7.06459e+07	7.12723e+07	6.86248e+07	6.44291e+07	5.77554e+07
1-Methyladenine	150.077	6.69	10	0.683861	344.28	2.26	70	-0.0255414	9118902	9775009	10743030	7836303	7612061	7699907	9260472	9000582	8166976	7637677	6595055	6988760
Imidazoleacetic acid	127.05	10.07	53	1.74402	162.112	9.68	73	-0.626434	2504144	3070259	3205834	2898636	2503841	2527433	2350144	2107816	2245526	2621601	2477584	2442527
3-Methyladenine	150.077	6.69	10	0.683861	223.075	12.86	66	-1.41361	9118902	9775009	10743030	7836303	7612061	7699907	9260472	9000582	8166976	7637677	6595055	6988760
7-Methyladenine	150.077	6.69	10	0.683861	260.198	11.21	39	-4.22268	9118902	9775009	10743030	7836303	7612061	7699907	9260472	9000582	8166976	7637677	6595055	6988760
Cytosine-2	112.051	11.94	40	-1.44692	148.061	10.91	75	-3.82081	16556005	15745636	16326074	14486192	11938241	13216845	12084887	12023281	13517818	15706101	16200432	12594012
Oleic Acid	283.263	0.84	N/A	0.302613	156.077	11.92	80	-2.51069	9.17423e+06	8.69825e+06	9.86169e+06	9.57467e+06	9.68486e+06	1.12076e+07	6.8761e+06	5.22357e+06	5.24029e+06	7.86876e+06	6.22332e+06	5.84006e+06
PC(p32:0)	718.575	2.23	80	-0.951054	424.342	1.89	98	-0.105741	995827500	1090134592	1068838084	1016275733	1133243330	1014769693	762009878	731017733	754704885	755193351	736252629	807274825
1-(sn-Glycero-3-phospho)-1D-myo-inositol	335.074	12.83	70	-1.30402	209.093	8.43	47	-1.72899	1.89445e+08	1.82957e+08	2.11205e+08	1.53318e+08	1.467e+08	1.4106e+08	1.45164e+08	1.3772e+08	1.31864e+08	1.47985e+08	1.49097e+08	1.28229e+08
D-glucose 6-phosphate	261.038	12.82	65	-1.13464	132.102	8.38	67	-3.22541	6.68036e+06	6.74903e+06	7.22267e+06	4.97403e+06	5.49726e+06	5.28969e+06	5.20814e+06	4.75269e+06	4.51289e+06	5.20999e+06	5.4318e+06	4.58198e+06
fructose 6-phosphate	261.038	12.82	65	-1.13464	147.113	11.95	30	-2.89478	6.68036e+06	6.74903e+06	7.22267e+06	4.97403e+06	5.49726e+06	5.28969e+06	5.20814e+06	4.75269e+06	4.51289e+06	5.20999e+06	5.4318e+06	4.58198e+06
galactose 1-phosphate	261.038	12.82	65	-1.09633	150.059	9.21	54	-2.59741	6.68036e+06	6.74903e+06	7.22267e+06	4.97403e+06	5.49726e+06	5.28969e+06	5.20814e+06	4.75269e+06	4.51289e+06	5.20999e+06	5.4318e+06	4.58198e+06
Flavone	223.075	12.86	66	-1.99637	288.217	2.98	65	-0.138662	1.1882e+08	1.16659e+08	1.3711e+08	1.44046e+08	1.42295e+08	1.31622e+08	1.01184e+08	9.8695e+07	9.59967e+07	1.09301e+08	1.06108e+08	9.0655e+07
L-Cystathionine	223.075	12.86	66	-1.41361	400.342	1.92	90	-0.475936	1.1882e+08	1.16659e+08	1.3711e+08	1.44046e+08	1.42295e+08	1.31622e+08	1.01184e+08	9.8695e+07	9.59967e+07	1.09301e+08	1.06108e+08	9.0655e+07
Thr-Cys	223.076	12.86	41	-3.96879	480.345	5.93	79	0.37608	1.1882e+08	1.16659e+08	1.3711e+08	1.44046e+08	1.42295e+08	1.31622e+08	1.01184e+08	9.8695e+07	9.59967e+07	1.09301e+08	1.06108e+08	9.0655e+07
Cys-Thr	223.076	12.86	20	-3.96879	510.355	6.28	94	1.05013	1.1882e+08	1.16659e+08	1.3711e+08	1.44046e+08	1.42295e+08	1.31622e+08	1.01184e+08	9.8695e+07	9.59967e+07	1.09301e+08	1.06108e+08	9.0655e+07
glucose 1-phosphate	261.038	12.82	65	-1.13464	538.387	6.15	58	0.98559	6.68036e+06	6.74903e+06	7.22267e+06	4.97403e+06	5.49726e+06	5.28969e+06	5.20814e+06	4.75269e+06	4.51289e+06	5.20999e+06	5.4318e+06	4.58198e+06
mannose 6-phosphate	261.038	12.82	65	-1.13464	536.371	6.2	76	0.328761	6.68036e+06	6.74903e+06	7.22267e+06	4.97403e+06	5.49726e+06	5.28969e+06	5.20814e+06	4.75269e+06	4.51289e+06	5.20999e+06	5.4318e+06	4.58198e+06
PC(36:2)	786.599	2.06	95	1.49777	440.314	6.98	84	0.820865	5.92599e+09	5.21575e+09	5.89256e+09	5.57415e+09	5.4824e+09	5.42362e+09	3.72841e+09	4.08424e+09	4.0465e+09	4.65404e+09	3.98513e+09	3.96416e+09
(+)-a-Pinene	137.132	0.83	N/A	0.739711	166.087	8.27	70	-2.63475	5.46282e+06	5.95695e+06	6.11589e+06	5.91521e+06	4.84593e+06	4.48404e+06	4.07002e+06	4.20078e+06	4.35153e+06	4.82087e+06	4.39767e+06	3.90959e+06
Propionylcarnitine	218.139	6.75	71	-0.342032	116.071	9.64	71	-2.49831	2.13815e+10	2.04655e+10	2.37013e+10	2.35432e+10	2.11496e+10	2.16928e+10	1.67521e+10	1.68466e+10	1.72532e+10	1.67905e+10	1.68024e+10	1.55633e+10
L-Alanine	90.055	10.23	50	5.86566	524.298	8.29	37	1.20686	5.78744e+08	5.38069e+08	6.37938e+08	6.05346e+08	5.27229e+08	5.18463e+08	4.01089e+08	3.96564e+08	3.98562e+08	4.61168e+08	4.60292e+08	4.02742e+08
Azelaic acid	189.112	0.85	32	0.487586	106.05	10.83	65	3.37689	2.4942e+07	2.90092e+07	2.7313e+07	2.74161e+07	2.85905e+07	2.92034e+07	1.94615e+07	2.0373e+07	2.03939e+07	2.12281e+07	2.06489e+07	1.94581e+07
beta-Alanine	90.0555	10.23	100	-0.0196293	120.066	10.44	71	2.24116	5.78744e+08	5.38069e+08	6.37869e+08	6.05279e+08	5.27229e+08	5.18463e+08	4.01046e+08	3.96986e+08	3.98562e+08	4.61168e+08	4.60292e+08	4.03227e+08
Sarcosine	90.0555	10.23	100	-0.0196293	120.066	10.44	61	2.24116	5.78744e+08	5.38069e+08	6.37869e+08	6.05279e+08	5.27229e+08	5.18463e+08	4.01046e+08	3.96986e+08	3.98562e+08	4.61168e+08	4.60292e+08	4.03227e+08
L-Serine	106.05	10.83	65	3.37689	205.098	8.39	40	-1.76849	5.88979e+07	5.666e+07	6.47925e+07	9.60855e+07	8.8048e+07	7.93964e+07	4.89089e+07	4.78107e+07	4.96963e+07	5.96242e+07	6.0238e+07	5.15906e+07
5-aminopentanamide	117.102	7.06	28	2.56084	182.082	9.62	100	-1.91788	6558724	6415341	7276356	7486080	7523356	6935145	5360379	4738128	4795061	4810618	5411986	5079304
Butyrylcarnitine	232.154	5.6	80	-0.494794	243.088	1.37	69	-1.9728	4.47126e+09	4.19691e+09	4.62839e+09	5.41528e+09	5.19307e+09	5.0663e+09	3.67496e+09	3.52565e+09	3.62297e+09	4.41275e+09	4.47651e+09	4.17061e+09
Isobutyryl carnitine	232.154	5.6	80	-0.796316	260.198	11.21	39	-4.22268	4.47126e+09	4.19691e+09	4.62839e+09	5.41528e+09	5.19307e+09	5.0663e+09	3.67496e+09	3.52565e+09	3.62297e+09	4.41275e+09	4.47651e+09	4.17061e+09
Hexanoylcarnitine	260.186	3.88	86	0.258597	260.198	11.21	39	-4.22268	4.18076e+08	4.03217e+08	4.3711e+08	4.57791e+08	4.31854e+08	4.48602e+08	2.68318e+08	2.89999e+08	2.71016e+08	3.27121e+08	3.46596e+08	2.80767e+08
Pentadecanoylcarnitine(C13:0)	386.326	1.98	80	-0.35796	468.309	6.5	92	-0.416386	4.73836e+07	4.74777e+07	5.27198e+07	4.83247e+07	4.74619e+07	4.07709e+07	3.81173e+07	3.73106e+07	3.58001e+07	3.87616e+07	3.93765e+07	3.38101e+07
PC(35:2)	772.586	2.12	89	-0.956292	496.34	6.34	100	-1.26876	9.60299e+08	8.8297e+08	9.86878e+08	1.0623e+09	1.03051e+09	9.9368e+08	7.35903e+08	7.74195e+08	8.04186e+08	8.70436e+08	8.53291e+08	7.01817e+08
PE(38:2)	772.585	2.12	89	-0.244397	524.372	6.22	100	-1.47088	9.60299e+08	8.8297e+08	9.86878e+08	1.0623e+09	1.03051e+09	9.9368e+08	7.35903e+08	7.74195e+08	8.04186e+08	8.70436e+08	8.53291e+08	7.01817e+08
Asymmetric dimethylarginine	203.15	11.13	100	0.692221	552.402	6.1	67	1.32177	3.55635e+08	3.43568e+08	3.79431e+08	2.94154e+08	2.52544e+08	2.58138e+08	3.1263e+08	2.95084e+08	2.96183e+08	2.99342e+08	2.63964e+08	2.55769e+08
Alpha-Linolenic acid	279.232	0.84	N/A	0.142556	550.387	6.14	80	-0.0209871	9.89098e+06	9.70443e+06	8.97521e+06	1.01219e+07	1.05125e+07	1.109e+07	7.50218e+06	6.79214e+06	7.12907e+06	7.5397e+06	7.73544e+06	6.76576e+06
Cytidine monophosphate-1	324.059	11.94	44	0.773525	548.372	6.2	71	1.55891	18491829	17542824	20482320	15276960	14422006	14877398	15211480	15972446	15539489	21022735	18648388	16233448
IS-Acetylcarnitine-D3	207.142	8.12	N/A	-3.29101	578.419	6.03	73	0.0518668	1.76209e+07	1.72381e+07	1.62774e+07	1.73904e+07	1.71633e+07	1.61831e+07	1.37884e+07	1.19746e+07	1.4175e+07	1.19551e+07	1.27318e+07	1.50522e+07
Benzylideneacetone	147.08	0.83	43	0.388881	572.372	6.12	82	-2.74141	1.9829e+08	2.17604e+08	1.82288e+08	2.13904e+08	2.34794e+08	2.18438e+08	1.61641e+08	1.50923e+08	1.59453e+08	1.62587e+08	1.53996e+08	1.50618e+08
Methylimidazoleacetic acid	141.066	9.89	33	0.717475	480.309	6.81	79	-0.367407	2.34173e+07	2.31107e+07	2.72322e+07	2.03835e+07	1.81296e+07	1.93166e+07	1.9468e+07	2.07707e+07	1.94852e+07	1.88615e+07	2.1318e+07	1.78363e+07
Palmitic amide	256.263	0.86	85	0.331194	510.356	6.28	94	-0.00795179	19429500	18204605	19959646	19770856	20132058	28592911	16365976	16127517	16368744	26457606	26348900	13540211
Trimethylamine N-oxide(TMAO)	76.0762	5.32	60	0.769983	538.387	6.15	58	-0.0174064	3.76895e+07	3.42689e+07	3.91173e+07	3.65409e+07	3.71379e+07	3.35867e+07	3.21834e+07	3.14132e+07	3.22422e+07	3.51608e+07	3.67038e+07	3.2307e+07
Oleoyl Ethanolamide	326.305	0.83	25	1.31654	536.372	6.2	76	-0.678005	4.93137e+07	4.59921e+07	5.21975e+07	5.22546e+07	5.03441e+07	5.2227e+07	4.31981e+07	4.15651e+07	4.43101e+07	4.4777e+07	4.60153e+07	4.10331e+07
cis-5-Tetradecenoylcarnitine	370.295	2.08	83	-0.65153	246.182	11.44	32	-3.95865	9304255	10330320	11634164	6034341	6704428	5413648	7855913	9485322	8579177	2972960	4106720	2953030
IS-Octanoylcarnitine-D3	291.236	2.98	70	0.569899	261.038	12.82	65	-1.13464	1.24794e+07	1.18581e+07	1.20408e+07	1.19343e+07	1.20259e+07	1.29897e+07	1.30441e+07	1.29715e+07	1.33997e+07	1.32563e+07	1.31711e+07	1.24375e+07
PC(37:2)	800.617	2.03	N/A	-1.24664	127.073	5.35	42	1.55661	1.67527e+08	1.7467e+08	1.6291e+08	1.84619e+08	1.80649e+08	1.76228e+08	1.1269e+08	1.13913e+08	1.25809e+08	1.32087e+08	1.42688e+08	1.26367e+08
PE(40:2)	800.616	2.03	N/A	-0.559671	160.133	6.38	70	0.0258107	1.67527e+08	1.7467e+08	1.6291e+08	1.84619e+08	1.80649e+08	1.76228e+08	1.1269e+08	1.13913e+08	1.25809e+08	1.32087e+08	1.42688e+08	1.26367e+08
deoxycarnitine	146.118	8.85	100	-3.9412	141.066	9.89	33	0.717475	5.00001e+09	4.87005e+09	5.34882e+09	5.12e+09	5.11132e+09	4.64178e+09	5.55735e+09	5.71869e+09	5.52176e+09	5.40594e+09	5.52169e+09	4.85839e+09
C20:1-OH carnitine	470.385	3.02	88	-0.0559882	372.311	2.05	90	-0.482859	2405806	2290386	2626527	1074153	798003	821853	1863643	2340380	1975559	1394312	1355060	1550785
2-Hydroxyadenine	152.057	7.16	58	0.617853	189.123	10.43	71	0.547665	5109470	4870012	5353815	4419943	4282099	3943582	5703541	6206091	5893358	5282588	5059252	5057964
Guanine	152.057	7.16	58	-2.80191	188.176	11	90	0.120746	5109470	4870012	5353815	4419943	4282099	3943582	5703541	6206091	5893358	5282588	5059252	5057964
PC(34:1)	760.586	2.21	96	-2.36998	189.16	11.45	49	-0.390448	8.44855e+09	9.41794e+09	8.72108e+09	8.64173e+09	8.77334e+09	8.49551e+09	9.87798e+09	1.05574e+10	1.10522e+10	1.03544e+10	1.01594e+10	9.25989e+09
PE(37:1)	760.585	2.21	96	-1.64685	219.113	2.78	50	0.106319	8.44855e+09	9.41794e+09	8.72108e+09	8.64173e+09	8.77334e+09	8.49551e+09	9.87798e+09	1.05574e+10	1.10522e+10	1.03544e+10	1.01594e+10	9.25989e+09
N-acetyl-D-tryptophan	247.108	1.55	100	3.22803	132.066	10.24	33	10.6555	29781715	29590692	32263254	28612254	25362514	21837729	39335525	35529025	34167921	29198567	29841266	24684083
5-methoxyindoleacetaldehyde; 3-Indolepropionic acid	190.086	8.27	21	0.313094	175.108	10.46	86	1.00191	2.31289e+06	2.22391e+06	2.62941e+06	2.04072e+06	1.68842e+06	1.68877e+06	1.67002e+06	2.20781e+06	2.93892e+06	943599	917943	670832
PC(32:2)	730.539	2.36	94	0.153587	219.113	2.78	50	0.106319	2342526789	2229603531	2401191334	2637649157	2525830434	1863457025	1712106170	1762582024	1777920903	1941040083	1959660683	1752301371
Pro-Pro	213.124	10.01	28	-4.23717	744.083	15.63	63	0.935836	7.08702e+06	7.17246e+06	8.45591e+06	6.67012e+06	5.97083e+06	5.94932e+06	9.30624e+06	9.14527e+06	8.81183e+06	7.85537e+06	7.77055e+06	7.22582e+06
glycerol 2-phosphate	173.021	11.13	45	-2.04608	189.123	10.29	50	0.547665	24280471	21089657	25854566	25005723	24010722	24437406	27812442	28888677	29845924	25101185	26737978	25289094
LPI(18:0)	601.335	8.58	92	0.936534	123.056	1.41	60	-2.78465	2378618	2062639	2249783	1822003	1919397	1554548	2538557	2760419	2846855	2037682	2255685	1772819
L-Phenylalanine	166.087	8.27	70	-2.63475	255.098	9.28	50	-1.6199	8.6049e+08	8.38517e+08	9.51143e+08	6.9692e+08	6.73149e+08	6.0666e+08	8.39896e+08	8.26607e+08	8.62731e+08	5.09174e+08	5.19474e+08	4.4766e+08
L-Lysine	147.113	11.95	30	-2.89478	115.05	10.19	40	1.6377	1.22576e+08	1.21539e+08	1.46339e+08	8.62928e+07	7.80771e+07	8.14838e+07	1.51711e+08	1.66233e+08	1.63266e+08	1.18325e+08	1.13506e+08	1.0821e+08
trans-Anethole	149.096	0.85	30	0.518038	538.519	0.84	44	0.645166	4.3792e+07	4.44262e+07	4.53248e+07	4.89595e+07	4.73648e+07	5.06095e+07	3.72635e+07	3.64161e+07	4.62179e+07	3.75829e+07	3.61566e+07	3.46539e+07
Citicoline	489.115	13.15	100	1.07153	204.123	8.14	62	-0.475306	1.2414e+08	1.17283e+08	1.39413e+08	1.03162e+08	9.40626e+07	8.93742e+07	1.59113e+08	1.5777e+08	1.57028e+08	1.39462e+08	1.30984e+08	1.1466e+08
cytidine 5'-diphosphocholine	489.115	13.12	100	0.00838857	270.316	1.61	30	-0.278357	1.2414e+08	1.17283e+08	1.39413e+08	1.03162e+08	9.40626e+07	8.93742e+07	1.59113e+08	1.5777e+08	1.57028e+08	1.39462e+08	1.30984e+08	1.1466e+08
Uridine 5'-monophosphate	325.044	11.27	62	-1.356	282.279	3.12	69	-0.216481	3.62578e+07	3.44203e+07	3.89483e+07	2.80045e+07	2.67236e+07	2.57589e+07	2.43941e+07	2.56082e+07	2.58727e+07	3.19469e+07	2.83176e+07	2.87582e+07
Dimethylurea	89.0709	1.36	36	5.74216	290.135	11.12	63	-1.35374	4.75479e+07	4.88252e+07	5.22965e+07	5.03344e+07	4.86699e+07	5.1354e+07	3.96386e+07	4.35885e+07	3.08073e+07	4.41032e+07	3.86486e+07	3.83652e+07
N-Acetylaspartylglutamic acid	305.098	10.38	N/A	0.698958	133.098	12.06	67	-2.70735	1.22201e+07	1.24752e+07	1.41141e+07	1.13933e+07	9.8391e+06	9.59363e+06	1.66797e+07	1.58332e+07	1.61169e+07	1.3609e+07	1.33714e+07	1.15181e+07
Choline	104.107	4.52	85	2.95489	613.159	15.28	100	1.27745	1.55668e+10	1.53329e+10	1.70052e+10	1.53448e+10	1.55633e+10	1.55255e+10	2.43351e+10	2.3897e+10	2.37217e+10	1.96703e+10	2.19965e+10	2.00218e+10
PC(34:2)	758.57	2.23	85	-0.567436	703.575	5.76	98	-1.28235	6478417309	7130425108	6820419048	7233416212	7036001467	7182374068	5838298320	5495464843	5699868888	5820287895	5860804791	5098676052
4-hydroxy-2-quinolinecarboxylic acid	190.05	0.8	33	-2.4346	1006.35	10.29	93	1.38733	1.02599e+08	1.03989e+08	1.11539e+08	1.01612e+08	1.00205e+08	8.90617e+07	1.4952e+08	1.3009e+08	1.27807e+08	1.15991e+08	1.35572e+08	1.15898e+08
Phosphocreatine	212.043	12.1	100	0.742366	220.118	2.06	84	-0.25053	3.36485e+07	3.05887e+07	3.52807e+07	5.55586e+07	5.30656e+07	4.90878e+07	4.35194e+07	4.04205e+07	4.44676e+07	3.52474e+07	3.52153e+07	3.12139e+07
2-Methoxyestradiol	303.195	0.81	N/A	0.641639	706.539	2.55	74	-1.57509	2.65387e+06	2.67989e+06	2.6025e+06	2.89944e+06	3.60055e+06	2.67595e+06	2.20307e+06	2.14992e+06	2.05634e+06	2.24782e+06	2.34463e+06	1.94785e+06
2-Hydroxymyristoylcarnitine	388.306	3.92	68	-1.18863	732.554	2.33	86	-1.03254	4.62268e+06	4.32139e+06	4.66823e+06	3.01372e+06	2.98609e+06	3.17524e+06	5.60348e+06	5.9344e+06	6.16224e+06	4.82095e+06	5.16403e+06	4.7025e+06
2-Phenylglycine	152.071	5.39	10	0.555762	746.57	2.3	79	-0.483122	28631445	28555464	28113974	28863284	26800930	24215562	20454333	20519015	21517060	24354778	25651733	22101767
Adenosine monophosphate	348.07	11.16	53	-0.09576	746.57	2.3	79	-0.483122	4.08004e+08	3.94038e+08	4.22544e+08	3.35622e+08	3.14231e+08	3.07391e+08	3.56514e+08	3.38801e+08	3.33575e+08	3.74118e+08	3.69196e+08	3.55952e+08
PC(36:1)	788.617	2.05	N/A	-7.4821	760.586	2.21	96	-2.36998	9.94786e+08	9.5377e+08	9.59325e+08	8.7108e+08	9.39542e+08	9.43255e+08	7.56866e+08	9.99244e+08	8.55415e+08	8.69582e+08	8.5371e+08	8.90445e+08
IS-Trp-d5	210.129	8.39	80	0.544549	772.586	2.12	89	-0.956292	4.02161e+07	4.21806e+07	4.15749e+07	4.378e+07	4.08417e+07	3.76961e+07	3.93349e+07	3.98771e+07	4.03118e+07	3.78879e+07	3.82737e+07	3.62856e+07
IS-Phe-D8	174.137	8.29	70	-2.50419	766.539	2.53	92	-0.996804	9.91305e+07	1.04541e+08	1.01648e+08	1.00313e+08	1.02878e+08	9.73472e+07	1.04292e+08	1.01221e+08	1.03297e+08	9.65459e+07	9.5932e+07	9.45036e+07
L-Octanoylcarnitine	288.217	2.98	65	-0.138662	786.599	2.06	95	1.49777	2.07359e+07	1.95407e+07	2.0897e+07	2.08466e+07	2.01622e+07	2.03325e+07	2.23508e+07	2.12904e+07	2.33509e+07	2.35756e+07	2.40146e+07	2.17987e+07
3-Hydroxyisovalerylcarnitine	262.165	8.57	73	0.562243	784.586	2.12	94	-0.944443	1.80647e+08	1.77195e+08	1.92962e+08	1.9607e+08	1.86637e+08	1.70109e+08	2.37199e+08	2.39147e+08	2.39107e+08	2.18887e+08	2.1314e+08	1.94372e+08
Calcidiol/7a-Hydroxy-cholestene-3-one	401.341	0.84	N/A	2.97899	782.57	1.98	82	-0.764515	33940208	38702795	33389529	41025253	41836323	36869460	43200953	48176066	53507979	37169143	43862463	45752767
Adenosine	268.104	4.13	70	0.402701	780.554	2.03	90	-0.248537	9.50294e+07	9.23821e+07	9.88913e+07	8.69581e+07	8.72e+07	8.64765e+07	1.06283e+08	1.05182e+08	9.9858e+07	1.11488e+08	1.12e+08	1.05159e+08
Deoxyguanosine	268.104	4.13	59	0.402701	808.586	1.93	89	-2.29399	9.50294e+07	9.23821e+07	9.88913e+07	8.69581e+07	8.72e+07	8.64765e+07	1.06283e+08	1.05182e+08	9.9858e+07	1.11488e+08	1.12e+08	1.05159e+08
L-a-Lysophosphatidylserine	526.314	8.4	99	1.15888	806.57	1.92	88	-0.741767	9.26522e+06	7.87984e+06	8.61558e+06	9.94199e+06	8.90094e+06	8.25583e+06	1.21034e+07	1.25016e+07	1.19962e+07	1.01429e+07	1.01895e+07	9.68771e+06
2-Ethylacrylylcarnitine, Tiglylcarnitine	244.154	5.34	40	0.549446	804.554	1.95	82	-0.688168	1.38098e+08	1.26621e+08	1.46154e+08	1.537e+08	1.61505e+08	1.49657e+08	1.49744e+08	1.50033e+08	1.53023e+08	1.63771e+08	1.6513e+08	1.50575e+08
PC(42:6)	862.633	1.88	N/A	-0.971208	834.601	1.94	93	-1.92335	8.31475e+07	8.56537e+07	8.71975e+07	9.1111e+07	9.37114e+07	9.15349e+07	7.76127e+07	8.47063e+07	9.00852e+07	1.09256e+08	9.74558e+07	9.60083e+07
Pro-Val	215.14	9.69	25	-4.29595	832.586	1.86	93	-0.651744	2.53023e+07	2.53465e+07	2.80394e+07	2.64855e+07	2.61397e+07	1.26421e+07	1.7504e+07	3.52796e+07	3.60688e+07	3.13167e+07	3.40244e+07	2.92762e+07
Val-Pro	215.14	9.7	29	-4.29595	830.57	1.88	82	-0.953912	2.53023e+07	2.53465e+07	2.80394e+07	2.64855e+07	2.61397e+07	1.26421e+07	1.7504e+07	3.52796e+07	3.60688e+07	3.13167e+07	3.40244e+07	2.92762e+07
Ile-Pro	229.156	9.7	11	-4.16608	854.57	1.73	83	-1.74593	1.9434e+07	1.85706e+07	2.06241e+07	2.12294e+07	2.38851e+07	1.99751e+07	2.60166e+07	2.64995e+07	2.53993e+07	2.38457e+07	2.35097e+07	2.31837e+07
Pro-Ile	229.155	9.7	12	-1.8096	856.586	1.78	63	-1.36129	1.9434e+07	1.85706e+07	2.06241e+07	2.12294e+07	2.38851e+07	1.99751e+07	2.60166e+07	2.64995e+07	2.53993e+07	2.38457e+07	2.35097e+07	2.31837e+07
Pro-Leu	229.155	9.7	12	-1.8096	746.606	2.16	95	-1.17209	1.9434e+07	1.85706e+07	2.06241e+07	2.12294e+07	2.38851e+07	1.99751e+07	2.60166e+07	2.64995e+07	2.53993e+07	2.38457e+07	2.35097e+07	2.31837e+07
Gln-Glu	276.12	11.92	38	-1.22672	744.591	2	87	-0.781602	1368542	1303019	1323252	3111779	2723266	2909923	1995539	1740632	2012155	1457619	1727019	1009798
Glu-Gln	276.118	11.92	35	5.83548	792.591	1.85	84	-0.792021	1368542	1303019	1323252	3111779	2723266	2909923	1995539	1740632	2012155	1457619	1727019	1009798
palmitoyl sphingomyelin (SM(d18:1/16:0))	703.575	5.76	98	-1.28235	794.606	1.82	73	-1.77614	5.60815e+09	5.28141e+09	5.53954e+09	6.65652e+09	6.50903e+09	6.20233e+09	6.74184e+09	6.95216e+09	6.80984e+09	6.52158e+09	6.91237e+09	6.45879e+09
Betaine aldehyde	102.091	9.68	86	4.08282	746.606	2.09	90	-1.17209	6.01884e+07	5.34268e+07	5.69599e+07	6.00647e+07	6.32966e+07	5.78933e+07	7.09039e+07	7.37439e+07	6.8196e+07	7.01245e+07	7.29081e+07	6.4361e+07
PE(36:4)	740.523	2.66	78	-1.11287	744.591	2	87	-0.781602	9.19373e+07	9.58822e+07	9.31719e+07	1.14e+08	9.49217e+07	1.02876e+08	1.06505e+08	1.05872e+08	1.08179e+08	1.18968e+08	1.18222e+08	1.06559e+08
LysoPC(22:1)	578.419	6.03	73	0.0518668	766.575	1.81	87	-0.666859	8.00012e+06	7.50969e+06	9.38666e+06	1.03812e+07	1.05411e+07	9.52415e+06	7.66897e+06	8.30226e+06	7.99101e+06	1.02557e+07	1.07155e+07	9.58397e+06
L-Carnitine	162.112	9.68	73	-0.626434	764.559	1.83	84	-0.0771032	9.4162e+09	9.04219e+09	9.4551e+09	1.02797e+10	1.00241e+10	9.40388e+09	1.16025e+10	1.16281e+10	1.14681e+10	1.18054e+10	1.17208e+10	1.12924e+10
4-hydroxy-L-phenylglycine	168.066	1.85	65	-2.29871	790.575	1.78	84	-0.373644	35171070	39755378	40225819	40802815	41626195	35580010	40617073	46664082	47373180	48778582	49915165	45638212
Pyridoxal/2-Amino-3-methoxy-benzoic Acid	168.066	1.85	65	0.795313	732.554	2.33	86	-0.281742	35171070	39755378	40225819	40802815	41626195	35580010	40617073	46664082	47373180	48778582	49915165	45638212
Glycerophosphocholine	258.11	10.8	80	-0.904455	740.523	2.66	78	-1.11287	2.29374e+10	2.28166e+10	2.50071e+10	2.45744e+10	2.17466e+10	2.20886e+10	2.21549e+10	2.11834e+10	2.13745e+10	2.03245e+10	1.86835e+10	1.70573e+10
Malonylcarnitine	248.113	10.74	50	-2.85468	760.585	2.21	96	-1.64685	1322912	939567	1271380	1579068	1609870	1380504	1610993	1688129	1878670	1257062	1309463	1087087
Glu-Thr	249.109	11.57	58	-2.6579	772.585	2.12	89	-0.244397	3716063	3615795	4438526	4799390	4311293	3396281	3919602	4137377	4554144	6761491	6406235	5195006
Thr-Glu	249.11	11.58	49	-1.40035	766.539	2.53	92	-0.996804	3716063	3615795	4438526	4799390	4311293	3396281	3919602	4137377	4554144	6761491	6406235	5195006
Guanidineacetic acid	118.062	10.32	84	-1.71961	750.544	2.26	32	-0.530258	5.66781e+06	4.70194e+06	5.68748e+06	1.31129e+07	1.18699e+07	1.1403e+07	7.44045e+06	7.70365e+06	7.20924e+06	9.21797e+06	9.27555e+06	8.15305e+06
LysoPC(20:1)	550.387	6.14	80	-0.0209871	386.326	1.98	80	-0.35796	4.78334e+07	4.76351e+07	5.29598e+07	6.37399e+07	6.50913e+07	5.85122e+07	5.23826e+07	5.80513e+07	5.33421e+07	6.47639e+07	6.71919e+07	5.9878e+07
1-(beta-D-Ribofuranosyl)-1,4-dihydronicotinamide	257.114	3.76	75	-2.07323	212.043	12.1	100	0.742366	3.1081e+06	2.63669e+06	2.73529e+06	3.5032e+06	3.21218e+06	3.12678e+06	3.3679e+06	3.42679e+06	3.61335e+06	3.89049e+06	4.11973e+06	3.72238e+06
4-Hydroxyindole	134.06	0.79	30	0.584427	318.3	1.77	100	-0.492827	5.32086e+06	5.47703e+06	5.41624e+06	5.5303e+06	5.6109e+06	4.9212e+06	8.25261e+06	7.01856e+06	7.29204e+06	7.2836e+06	7.57947e+06	6.60479e+06
1-Methylnicotinamide	137.071	6.72	75	0.0378975	246.171	4.72	90	-2.4482	6.08871e+09	5.90569e+09	6.78056e+09	9.87764e+09	8.99122e+09	9.29827e+09	8.74609e+09	8.77651e+09	8.80603e+09	1.4763e+10	1.44062e+10	1.39187e+10
Niacinamide (VB3)	123.056	1.41	60	-2.78465	230.115	10.99	37	-3.83166	6.21263e+07	5.30427e+07	6.33122e+07	6.39902e+07	8.53893e+07	8.01292e+07	1.32738e+08	1.24163e+08	1.44831e+08	8.22326e+07	8.47351e+07	7.40921e+07
LPC(19:1)	536.371	6.2	76	0.328761	218.139	6.75	71	-0.342032	1.29155e+07	1.22206e+07	1.48529e+07	2.01045e+07	1.99094e+07	1.88007e+07	1.61737e+07	1.88822e+07	1.59119e+07	1.77387e+07	1.86154e+07	1.766e+07
LysoPE(22:1)	536.372	6.2	76	-0.678005	130.05	10.91	60	1.20746	1.29155e+07	1.22206e+07	1.48529e+07	2.01045e+07	1.99094e+07	1.88007e+07	1.61737e+07	1.88822e+07	1.59119e+07	1.77387e+07	1.86154e+07	1.766e+07
3-Hydroxyhexadecanoylcarnitine	416.338	3.53	87	-0.91455	424.102	12.11	100	0.852939	1.42416e+07	1.40684e+07	1.50998e+07	8.97961e+06	9.13525e+06	8.86648e+06	2.23958e+07	2.14633e+07	2.28087e+07	1.62619e+07	1.84213e+07	1.52356e+07
Uracil	113.035	1.78	83	-2.22293	399.145	12.72	100	-0.449952	4.21559e+06	4.33849e+06	5.52819e+06	3.89264e+06	4.24706e+06	3.65447e+06	6.32926e+06	6.40585e+06	6.8824e+06	6.08961e+06	6.6826e+06	6.32864e+06
5-hydroxytryptophol	178.086	8.27	N/A	0.575936	385.129	10.98	60	-0.593851	7.53478e+07	7.61354e+07	7.78385e+07	8.74758e+07	8.45353e+07	7.88566e+07	8.02574e+07	8.31353e+07	8.50682e+07	1.00711e+08	9.94369e+07	9.26598e+07
Cytosine-1	112.051	13.2	40	-1.44692	399.145	12.72	100	0.852832	13320173	12314488	16033930	14378971	12991773	13200383	20885747	20992085	20470675	20426740	20159511	17276777
PC(p18:1/20:3)/PC(p16:0/22:4)	794.606	1.82	73	-1.77614	90.0555	10.23	100	-0.0196293	3.34132e+08	3.19788e+08	3.56713e+08	3.1246e+08	3.3256e+08	3.16165e+08	5.0176e+08	5.22968e+08	5.38144e+08	5.02568e+08	4.6041e+08	4.40943e+08
3-hydroxydecanoyl carnitine	332.244	5.25	32	-4.95588	300.29	3.09	83	-0.189041	1636669	1806725	1818877	1633788	1523171	1526632	2643556	2461019	3121504	1299889	1659699	951666
LysoPC(20:4)	544.34	6.24	66	-3.87596	126.022	9.67	60	-2.84594	28377037	26838018	30682712	38048881	37940547	33763610	35364672	66689886	38321737	35829841	37055277	47580281
LysoPC(16:1)	494.325	6.39	N/A	-0.090065	372.311	2.05	94	-0.536579	1.85683e+08	1.76781e+08	1.9785e+08	2.23602e+08	2.22014e+08	1.8487e+08	2.65546e+08	4.26742e+08	2.97172e+08	2.29532e+08	2.44945e+08	3.1508e+08
Sphingosine	300.29	3.09	83	-0.189041	265.112	8.38	45	0.336099	1.15927e+08	1.06907e+08	1.22606e+08	1.24323e+08	1.21137e+08	1.1606e+08	1.70383e+08	1.6967e+08	1.83415e+08	1.87004e+08	1.9151e+08	1.87908e+08
Cys-Gly	179.05	11.18	76	-5.65106	223.076	12.86	41	-3.96879	1.3647e+08	1.27163e+08	1.38986e+08	1.88275e+08	1.69269e+08	1.67282e+08	1.91485e+08	1.74896e+08	1.76673e+08	1.95325e+08	1.90367e+08	1.84473e+08
Cysteinylglycine	179.049	11.18	73	-2.52344	149.096	0.85	30	0.518038	1.3647e+08	1.27163e+08	1.38986e+08	1.88275e+08	1.69269e+08	1.67282e+08	1.91485e+08	1.74896e+08	1.76673e+08	1.95325e+08	1.90367e+08	1.84473e+08
Xanthine	153.041	5.35	47	-3.28446	398.327	1.96	95	-0.263309	2177007	1853789	2349020	1332673	1230387	1229755	3337726	3620324	3256023	1846844	1786346	1645799
Tetrahydrodeoxycorticosterone	335.258	1.28	N/A	0.902933	76.0762	5.32	60	0.769983	2.19924e+06	1.79593e+06	2.03104e+06	1.89793e+06	1.81352e+06	1.70161e+06	2.98302e+06	2.97009e+06	3.73857e+06	2.00726e+06	1.69595e+06	1.68518e+06
Gly-Cys	179.05	11.18	36	-5.65106	608.089	13.42	89	0.285868	1.3647e+08	1.27163e+08	1.38986e+08	1.88275e+08	1.69269e+08	1.67282e+08	1.91485e+08	1.74896e+08	1.76673e+08	1.95325e+08	1.90367e+08	1.84473e+08
7a,12a-Dihydroxy-5b-cholestan-3-one	419.352	0.82	N/A	-0.355764	113.035	1.78	83	-2.22293	1.05298e+06	982226	1.09466e+06	1.32454e+06	1.49336e+06	1.38148e+06	1.71494e+06	1.4441e+06	1.48078e+06	1.49799e+06	1.2052e+06	1.72995e+06
N-hexadecanoylsphinganine-1-phosphocholine	705.591	5.47	N/A	-0.841448	325.044	11.27	62	-1.356	2.60532e+08	2.23098e+08	2.162e+08	3.88218e+08	4.51333e+08	3.91903e+08	2.99118e+08	3.64817e+08	3.22954e+08	3.23268e+08	3.31843e+08	3.39223e+08
Succinylcarnitine	262.129	9.92	92	-1.49713	139.051	1.42	43	-3.61326	8000333	7755134	9297275	8507706	8283519	8544040	11339285	11864651	11843144	12383414	12027992	11549790
PC(42:10)	854.57	1.73	83	-1.74593	426.358	1.86	99	-0.301919	1.19003e+07	1.18792e+07	1.2346e+07	1.85894e+07	1.99827e+07	1.9136e+07	1.85852e+07	1.87981e+07	1.89624e+07	2.69858e+07	2.50633e+07	2.38129e+07
1-methyladenosine	282.12	9.13	33	-1.42229	484.437	1.69	2	-0.872712	1.47427e+07	1.43698e+07	1.6123e+07	1.66392e+07	1.64581e+07	1.56937e+07	1.94593e+07	2.02092e+07	2.08423e+07	2.30257e+07	2.16039e+07	2.12891e+07
Glutathione	308.091	11.18	100	-0.84643	205.155	11.76	10	0.856167	4.58286e+09	4.49835e+09	4.74243e+09	6.5249e+09	5.79462e+09	5.74983e+09	6.89391e+09	6.15456e+09	6.30246e+09	6.95335e+09	6.82779e+09	6.70256e+09
PC(35:6)	764.522	2.54	35	-2.78207	478.329	6.34	10	0.758047	51599549	43569485	47965724	49148934	59296521	54817172	66557928	75292761	73575752	70010865	69396505	74302155
Glu-Lys	276.156	12.78	34	-0.768621	191.118	4.93	11	0.604234	641769	826227	708210	792233	1210449	844184	1114623	1082516	1479735	1922872	2006689	922752
Lys-Glu	276.157	12.78	49	-4.71565	229.156	9.7	11	-4.16608	641769	826227	708210	792233	1210449	844184	1114623	1082516	1479735	1922872	2006689	922752
PE(38:6)	764.523	2.54	35	-3.50147	229.155	9.7	12	-1.8096	51599549	43569485	47965724	49148934	59296521	54817172	66557928	75292761	73575752	70010865	69396505	74302155
LysoPC(22:4)	572.372	6.12	82	-2.74141	229.155	9.7	12	-1.8096	2.21584e+06	2.05519e+06	2.55048e+06	3.17417e+06	3.22867e+06	2.9495e+06	2.64546e+06	3.39022e+06	2.64975e+06	3.55993e+06	3.57383e+06	3.16263e+06
PC(42:9)	856.586	1.78	63	-1.36129	108.081	1.02	20	3.06084	9.09799e+06	9.4923e+06	9.64655e+06	1.46129e+07	1.58268e+07	1.51576e+07	1.45245e+07	1.54838e+07	1.54607e+07	2.42211e+07	2.22394e+07	2.09639e+07
LysoPC(22:0)	580.434	5.98	N/A	0.0161271	223.076	12.86	20	-3.96879	1.68554e+06	1.47831e+06	1.67243e+06	2.21566e+06	2.01214e+06	1.82414e+06	2.60002e+06	2.61769e+06	2.57752e+06	3.46125e+06	3.28885e+06	3.03863e+06
Oleamide	282.279	3.12	69	-0.216481	174.113	1.08	20	-2.50268	2.38312e+08	2.23559e+08	2.51725e+08	2.46707e+08	2.43456e+08	2.25274e+08	3.35127e+08	3.38321e+08	3.55329e+08	3.61514e+08	3.69899e+08	3.57243e+08
Nicotinamide Ribose	255.098	9.28	50	-1.6199	269.089	6.47	20	-1.40277	1.41498e+07	1.39866e+07	1.56735e+07	1.99559e+07	1.90725e+07	1.81269e+07	1.89667e+07	2.11405e+07	1.98576e+07	2.32764e+07	2.28976e+07	2.0676e+07
Cytidine monophosphate-2	324.059	13.21	44	0.773525	482.361	6.48	20	0.241337	10322381	9404022	11497101	11417686	9865451	10213290	16822107	16555036	16511800	17161895	16339256	14611450
L-Acetylcarnitine	204.123	8.14	62	-0.475306	174.113	1.08	20	-2.50268	1.1757e+10	1.14068e+10	1.26102e+10	1.1818e+10	1.14257e+10	1.04895e+10	1.89315e+10	1.8594e+10	1.93034e+10	1.8411e+10	1.92079e+10	1.75127e+10
O-Acetyl-L-carnitine	204.123	8.14	62	-0.475306	190.086	8.27	21	0.313094	1.1757e+10	1.14068e+10	1.26102e+10	1.1818e+10	1.14257e+10	1.04895e+10	1.89315e+10	1.8594e+10	1.93034e+10	1.8411e+10	1.92079e+10	1.75127e+10
PC(40:8)	830.57	1.88	82	-0.953912	478.293	6.86	22	0.0661446	2.15209e+07	2.17799e+07	2.17925e+07	3.0631e+07	3.10355e+07	2.75577e+07	3.52237e+07	3.57982e+07	3.64274e+07	4.33123e+07	4.0754e+07	3.95519e+07
PC(p16:0/22:5)/PC(p18:1/20:4)	792.591	1.85	84	-0.792021	154.087	1.65	22	-3.46116	4.3021e+08	4.24057e+08	4.70755e+08	3.77751e+08	3.89505e+08	3.9179e+08	7.84169e+08	7.84482e+08	8.42532e+08	6.97309e+08	6.74068e+08	6.44796e+08
LPC(17:0)	510.355	6.28	94	1.05013	246.182	11.44	23	-3.95865	1.15826e+08	1.01923e+08	1.24402e+08	2.0038e+08	1.90183e+08	1.66867e+08	1.63011e+08	1.73853e+08	1.5988e+08	1.81017e+08	1.86967e+08	1.68815e+08
LysoPE(20:0)	510.356	6.28	94	-0.00795179	131.034	10.91	24	1.44139	1.15826e+08	1.01923e+08	1.24402e+08	2.0038e+08	1.90183e+08	1.66867e+08	1.63011e+08	1.73853e+08	1.5988e+08	1.81017e+08	1.86967e+08	1.68815e+08
LysoPE(16:0)	454.293	6.9	83	-0.707683	131.034	10.91	24	1.44139	24850314	24369622	26236634	28438469	26387809	26978741	35447762	39111509	37290128	39968548	40607622	37834512
DL-Stearoylcarnitine	428.373	1.82	81	0.401889	146.06	8.4	25	0.58249	4.18725e+07	4.22086e+07	5.04799e+07	4.01816e+07	4.0991e+07	3.79357e+07	6.66493e+07	6.49142e+07	6.72934e+07	7.52323e+07	7.23799e+07	6.36728e+07
Ile-Lys	260.198	11.19	32	-4.22268	179.07	3.41	25	0.368197	6.18706e+06	5.23217e+06	6.21742e+06	4.23269e+06	3.13682e+06	3.24605e+06	1.22515e+07	1.13099e+07	1.08375e+07	5.68435e+06	5.14829e+06	6.59027e+06
Leu-Lys	260.198	11.21	39	-4.22268	326.305	0.83	25	1.31654	6.18706e+06	5.23217e+06	6.21742e+06	4.23269e+06	3.13682e+06	3.24605e+06	1.22515e+07	1.13099e+07	1.08375e+07	5.68435e+06	5.14829e+06	6.59027e+06
Lys-Ile	260.198	11.21	39	-4.22268	215.14	9.69	25	-4.29595	6.18706e+06	5.23217e+06	6.21742e+06	4.23269e+06	3.13682e+06	3.24605e+06	1.22515e+07	1.13099e+07	1.08375e+07	5.68435e+06	5.14829e+06	6.59027e+06
Lys-Leu	260.198	11.21	39	-4.22268	213.124	10.01	28	-4.23717	6.18706e+06	5.23217e+06	6.21742e+06	4.23269e+06	3.13682e+06	3.24605e+06	1.22515e+07	1.13099e+07	1.08375e+07	5.68435e+06	5.14829e+06	6.59027e+06
3-ketosphingosine	298.274	3.25	62	0.25525	215.14	9.7	29	-4.29595	23656345	23932144	24940031	23820357	23776571	21861423	38416910	39187670	37673630	38930679	41052395	35347165
LPE(16:0e)	440.314	6.98	84	0.820865	137.132	0.83	N/A	0.739711	4.83556e+06	4.67586e+06	5.37218e+06	5.19396e+06	4.98439e+06	4.32699e+06	6.95839e+06	7.18822e+06	7.60022e+06	8.29475e+06	7.99591e+06	7.46387e+06
Thiamine	265.112	8.38	45	0.336099	128.071	9.87	N/A	1.65561	7.42784e+08	7.44798e+08	7.95397e+08	8.76152e+08	7.72675e+08	7.68822e+08	1.25645e+09	1.23072e+09	1.2971e+09	1.23133e+09	1.2345e+09	1.22326e+09
ADP	428.037	12.76	81	0.949208	444.369	3.23	N/A	-0.86146	4.69214e+06	4.5657e+06	4.74166e+06	5.55049e+06	5.365e+06	5.36713e+06	7.10132e+06	7.47444e+06	7.0534e+06	8.0421e+06	7.80014e+06	6.79719e+06
Deoxyguanosine diphosphate	428.037	12.76	81	-0.26564	303.195	0.81	N/A	0.641639	4.69214e+06	4.5657e+06	4.74166e+06	5.55049e+06	5.365e+06	5.36713e+06	7.10132e+06	7.47444e+06	7.0534e+06	8.0421e+06	7.80014e+06	6.79719e+06
PC(38:2)	814.633	1.98	N/A	-1.61444	147.066	0.91	N/A	-3.45865	2.61028e+08	2.58809e+08	2.40369e+08	2.55341e+08	2.64861e+08	2.7881e+08	1.46098e+08	1.62652e+08	1.81306e+08	2.14553e+08	2.01818e+08	2.00131e+08
Oxidized glutathione	613.159	15.28	100	1.27745	151.075	0.84	N/A	0.688241	2.80358e+07	2.37664e+07	2.84636e+07	3.7584e+07	3.88684e+07	3.59927e+07	4.22968e+07	4.10621e+07	3.62941e+07	4.2628e+07	4.93571e+07	4.01047e+07
IS-LPC(14:0)	468.309	6.48	89	-0.416386	178.086	8.27	N/A	0.575936	9.50272e+07	8.86971e+07	1.07992e+08	1.16069e+08	1.09568e+08	9.6501e+07	1.74726e+08	2.1233e+08	1.79672e+08	1.6018e+08	1.61984e+08	1.58929e+08
LysoPC(14:0)	468.309	6.5	92	-0.416386	419.352	0.82	N/A	-0.355764	9.50272e+07	8.86971e+07	1.07992e+08	1.16069e+08	1.09568e+08	9.6501e+07	1.74726e+08	2.1233e+08	1.79672e+08	1.6018e+08	1.61984e+08	1.58929e+08
LysoPC(18:0)	524.372	6.22	100	-1.47088	810.133	12.21	N/A	1.11139	6.79357e+08	6.21299e+08	7.70084e+08	1.20677e+09	1.22229e+09	1.10957e+09	9.35518e+08	1.00066e+09	9.39903e+08	1.15133e+09	1.2124e+09	1.05189e+09
Hypotaurine	110.028	10.18	54	-1.56993	279.232	0.84	N/A	0.142556	8.52752e+07	7.88893e+07	9.10207e+07	1.02312e+08	9.92618e+07	8.99565e+07	9.36699e+07	9.4636e+07	9.21304e+07	1.21294e+08	1.24789e+08	1.15105e+08
Hydroxybutyrylcarnitine	248.15	9.24	100	-1.63651	456.405	1.74	N/A	0.769142	1.97416e+08	1.89402e+08	2.06245e+08	1.74552e+08	1.74341e+08	1.60548e+08	3.40452e+08	3.41352e+08	3.59838e+08	3.3439e+08	3.45869e+08	3.09161e+08
PC(40:5)	836.617	1.96	N/A	-1.91733	398.363	0.82	N/A	0.189669	1.86091e+08	1.70702e+08	1.82302e+08	1.93018e+08	1.95331e+08	1.87756e+08	2.65834e+08	2.88899e+08	3.15085e+08	3.24608e+08	3.07773e+08	2.84095e+08
Citrulline	176.103	10.98	100	-2.37962	202.144	3	N/A	-2.43264	1.13099e+08	1.11912e+08	1.57382e+08	9.36587e+07	8.65562e+07	8.61643e+07	2.533e+08	2.47792e+08	2.34384e+08	2.07616e+08	2.05621e+08	1.65475e+08
PC(40:7)	832.586	1.86	93	-0.651744	447.068	13.22	N/A	1.07922	2.17813e+08	2.25004e+08	2.41979e+08	2.61251e+08	2.74525e+08	2.58587e+08	3.66198e+08	3.71191e+08	3.89273e+08	4.16214e+08	3.90924e+08	3.59437e+08
Phosphorylcholine	184.073	11.38	77	-0.091145	343.123	11.12	N/A	0.309484	31034403496	29129185484	32521335784	46935959441	37778615871	37844112800	51594318877	51653634108	50747317148	56503646799	57524439691	45239071861
LysoPE(18:0)/LysoPC(15:0)	482.325	6.42	30	-0.230149	768.122	12.78	N/A	1.02863	79023503	73590120	83087383	130577016	129764155	111703288	126970297	152660623	140990641	133116692	141266179	132691451
PE(p38:5)	750.544	2.26	32	-0.530258	333.059	10.91	N/A	4.0356	5.70606e+07	6.0832e+07	5.75808e+07	5.87229e+07	5.50426e+07	6.22541e+07	1.07551e+08	1.15356e+08	1.23463e+08	1.02663e+08	9.52305e+07	1.06601e+08
beta-Nicotinamide adenine dinucleotide hydrate (NAD)	664.117	12.76	93	0.199288	343.124	11.12	N/A	-1.206	7.10946e+07	6.77716e+07	7.83617e+07	1.00511e+08	9.19359e+07	8.92442e+07	1.22225e+08	1.16441e+08	1.1446e+08	1.38489e+08	1.29599e+08	1.11706e+08
Cytidine monophosphate N-acetylneuraminic acid-2	615.155	15.28	38	2.32976	195.138	0.84	N/A	0.612423	2497112	2247367	2347002	3451331	3818595	3262203	3539939	4019430	3276208	4272986	4278317	3936277
PC(40:6)	834.601	1.94	93	-1.92335	207.142	8.12	N/A	-3.29101	1.75732e+08	1.67762e+08	1.92203e+08	2.11042e+08	2.05846e+08	2.03782e+08	2.9459e+08	3.12562e+08	3.28037e+08	3.44345e+08	3.10431e+08	2.93944e+08
1-palmitoylglycerophosphocholine	496.34	6.34	100	-0.523305	472.322	1.54	N/A	-1.37395	1.87117e+09	1.71739e+09	2.07274e+09	2.65188e+09	2.52567e+09	2.28735e+09	3.39982e+09	3.58101e+09	3.55666e+09	3.28809e+09	3.61943e+09	3.32259e+09
LysoPC(16:0)	496.34	6.34	100	-1.26876	198.124	10.76	N/A	-2.56009	1.87117e+09	1.71739e+09	2.07274e+09	2.65188e+09	2.52567e+09	2.28735e+09	3.39982e+09	3.58101e+09	3.55666e+09	3.28809e+09	3.61943e+09	3.32259e+09
UDP-N-acetyl-D-galactosamine	608.089	13.42	89	0.285868	324.29	0.88	N/A	0.0871021	1.24015e+08	1.20977e+08	1.38425e+08	1.29245e+08	1.17757e+08	1.16151e+08	2.4376e+08	2.4129e+08	2.43497e+08	2.41956e+08	2.41411e+08	2.11072e+08
LPC(19:0)	538.387	6.15	58	0.98559	494.325	6.39	N/A	-0.090065	1.73362e+07	1.61292e+07	1.94128e+07	3.5725e+07	3.53475e+07	3.23534e+07	2.07345e+07	2.11203e+07	2.1403e+07	3.32185e+07	3.37898e+07	3.00742e+07
LysoPE(22:0)	538.387	6.15	58	-0.0174064	580.434	5.98	N/A	0.0161271	1.73362e+07	1.61292e+07	1.94128e+07	3.5725e+07	3.53475e+07	3.23534e+07	2.07345e+07	2.11203e+07	2.1403e+07	3.32185e+07	3.37898e+07	3.00742e+07
Pantothenic Acid(VB5)	220.118	2.06	84	-0.25053	185.128	11.34	N/A	-0.696995	1.96946e+09	2.04224e+09	2.1511e+09	2.22964e+09	2.29841e+09	1.94523e+09	3.83762e+09	3.79265e+09	3.70796e+09	3.87926e+09	4.01039e+09	3.43759e+09
5-L-Glutamyl-L-alanine	219.098	10.88	63	-0.0348975	305.098	10.38	N/A	0.698958	5.26261e+06	5.77151e+06	6.27943e+06	6.38196e+06	6.77481e+06	5.74075e+06	9.35798e+06	7.91122e+06	7.95693e+06	1.21475e+07	1.05972e+07	9.47091e+06
Ala-Glu	219.098	10.88	40	-2.54519	705.591	5.47	N/A	-0.841448	5.26261e+06	5.77151e+06	6.27943e+06	6.38196e+06	6.77481e+06	5.74075e+06	9.35798e+06	7.91122e+06	7.95693e+06	1.21475e+07	1.05972e+07	9.47091e+06
alpha-glutamylalanine	219.098	10.82	72	-2.54519	283.263	0.84	N/A	0.302613	5.26261e+06	5.77151e+06	6.27943e+06	6.38196e+06	6.77481e+06	5.74075e+06	9.35798e+06	7.91122e+06	7.95693e+06	1.21475e+07	1.05972e+07	9.47091e+06
Glu-Ala	219.098	10.85	32	-2.54519	774.601	2.16	N/A	-2.39596	5.26261e+06	5.77151e+06	6.27943e+06	6.38196e+06	6.77481e+06	5.74075e+06	9.35798e+06	7.91122e+06	7.95693e+06	1.21475e+07	1.05972e+07	9.47091e+06
LysoPC(22:6)	568.34	5.83	56	-1.00831	788.617	2.05	N/A	-7.4821	8344767	8549852	9456718	10018787	10298238	10077404	16815490	21761777	19658540	15637173	17088709	16777326
7-hydroxy-3-oxocholanoic acid	391.284	0.8	51	-0.323705	800.617	2.03	N/A	-1.24664	2.64157e+08	2.7765e+08	3.02262e+08	3.70169e+08	3.91471e+08	3.58066e+08	5.45669e+08	5.06392e+08	4.9845e+08	5.1912e+08	5.74081e+08	4.9467e+08
S-(1,2-DICARBOXYETHYL)GLUTATHIONE	424.102	12.11	100	0.852939	814.633	1.98	N/A	-1.61444	2.64327e+06	3.41982e+06	3.46747e+06	6.63567e+06	7.27447e+06	3.1789e+06	1.66733e+06	2.30005e+06	1.27019e+06	6.64702e+06	6.60361e+06	4.69339e+06
Ile-Glu	261.146	10.25	30	-2.15371	836.617	1.96	N/A	-1.91733	11606500	11240687	13023701	12669419	12591974	12236797	24265327	25080010	25294246	23635449	23570778	20534132
2-Hydroxypyridine	96.0444	13.43	31	5.19169	862.633	1.88	N/A	-0.971208	3.73339e+07	3.39089e+07	4.15198e+07	3.61364e+07	3.44204e+07	3.12814e+07	7.50352e+07	7.04174e+07	7.75339e+07	7.40602e+07	7.4628e+07	6.50334e+07
Glu-Val	247.129	10.61	36	-1.34522	774.601	2.16	N/A	-2.39596	7204282	7423252	8324520	8518894	6880517	6711060	15388172	15783103	14960860	14178979	13275449	11631924
LPC(16:2e)	478.329	6.34	10	0.758047	800.616	2.03	N/A	-0.559671	1.2305e+07	1.11496e+07	1.27174e+07	1.70435e+07	1.65615e+07	1.47242e+07	2.12679e+07	2.59675e+07	2.38026e+07	2.21367e+07	2.5216e+07	2.13423e+07
1-Hydroxy-2-aminoethylphosphonate	142.027	11.52	31	-3.09536	321.279	0.8	N/A	1.20333	229072	154733	145497	182525	129678	131097	2238690	1557634	2433455	657114	237462	565204
ethanolamine phosphate	142.027	11.52	31	-3.09536	563.265	1.16	N/A	0.302901	229072	154733	145497	182525	129678	131097	2238690	1557634	2433455	657114	237462	565204
O-Phosphorylethanolamine	142.026	11.52	31	0.49052	335.258	1.28	N/A	0.902933	229072	154733	145497	182525	129678	131097	2238690	1557634	2433455	657114	237462	565204
LPC(16:0e)	482.361	6.48	20	0.241337	149.081	10.74	N/A	2.81452	4.78669e+08	4.51454e+08	5.37655e+08	4.04206e+08	3.88913e+08	3.35301e+08	5.41979e+08	5.9154e+08	5.69271e+08	4.92231e+08	4.95755e+08	4.26721e+08
Epinephrine	184.097	2.04	10	-2.61287	114.055	10.23	NA	3.22665	70245408	72570811	75501364	77650702	81875782	68483676	142303442	143892955	140301417	146431082	148848957	124169073
normetanephrine	184.097	2.04	10	-2.61287	142.027	11.52	31	-3.09536	70245408	72570811	75501364	77650702	81875782	68483676	142303442	143892955	140301417	146431082	148848957	124169073
Betaine	118.087	8.34	100	-2.96734	150.077	6.69	10	0.683861	1.44842e+10	1.41884e+10	1.53662e+10	1.57132e+10	1.50694e+10	1.43774e+10	1.33982e+10	1.33335e+10	1.34901e+10	1.46016e+10	1.44428e+10	1.40472e+10
Saccharopine	277.139	12.66	83	1.6233	302.233	2.72	52	-0.0238193	21229621	20497382	22965745	26630935	25262174	22210496	49650036	52039989	49083990	76892553	75805585	64494155
AcylCarnitine(20:1)	454.389	1.78	69	0.16639	138.055	8.85	46	0.806494	1.64733e+07	1.59888e+07	1.8902e+07	1.38173e+07	1.39321e+07	1.34218e+07	1.37893e+07	1.39926e+07	1.42792e+07	1.59285e+07	1.50381e+07	1.42366e+07
Creatinine	114.067	3.95	80	-2.50526	152.057	7.16	58	0.617853	2.76294e+09	2.643e+09	2.87518e+09	2.87832e+09	2.63336e+09	2.77472e+09	2.55808e+09	2.53158e+09	2.64383e+09	3.00439e+09	3.05844e+09	2.7084e+09
Glu-Ile	261.145	10.31	50	-1.80281	138.091	2.47	26	0.108009	10797945	11240687	13023701	12641696	11757521	12236797	24265327	25080010	25294246	23635449	23570778	20534132
Lys-Val	246.182	11.44	32	-3.95865	152.071	5.39	10	0.555762	3.50069e+08	3.38281e+08	3.90262e+08	3.26131e+08	2.77085e+08	2.84089e+08	3.98257e+08	3.93602e+08	4.02795e+08	3.3885e+08	3.09626e+08	2.98703e+08
Val-Lys	246.182	11.44	23	-3.95865	86.06	10.24	38	6.34887	3.50069e+08	3.38281e+08	3.90262e+08	3.26131e+08	2.77085e+08	2.84089e+08	3.98257e+08	3.93602e+08	4.02795e+08	3.3885e+08	3.09626e+08	2.98703e+08
Glu-Leu	261.145	10.31	32	-1.80281	174.055	2.99	28	-2.55561	10797945	11240687	13023701	12641696	11757521	12236797	24265327	25080010	25294246	23635449	23570778	20534132
Leu-Glu	261.146	10.31	34	-2.15371	442.353	3.25	100	1.63286	10797945	11240687	13023701	12641696	11757521	12236797	24265327	25080010	25294246	23635449	23570778	20534132
2-Hydroxyphenethylamine	138.091	2.47	26	0.108009	414.322	3.6	80	1.87716	48915746	63526579	57512472	68934196	59266029	63802716	50163095	41661584	41515015	42017711	47375368	45595579
phenylethanolamine	138.092	2.47	26	-3.6576	332.244	5.25	32	-4.95588	48915746	63526579	57512472	68934196	59266029	63802716	50163095	41661584	41515015	42017711	47375368	45595579
Tyramine	138.092	2.47	26	-3.6576	360.275	4.46	49	-4.63646	48915746	63526579	57512472	68934196	59266029	63802716	50163095	41661584	41515015	42017711	47375368	45595579
L-gamma-glutamyl-L-isoleucine	261.145	10.31	50	-1.80281	304.212	6.18	62	-1.64036	10797945	11240687	13023701	12641696	11757521	12236797	24265327	25080010	25294246	23635449	23570778	20534132
L-gamma-glutamyl-L-leucine	261.145	10.31	50	-1.80281	298.274	3.25	62	0.25525	10797945	11240687	13023701	12641696	11757521	12236797	24265327	25080010	25294246	23635449	23570778	20534132
Arachidyl carnitine(C20:0)	456.405	1.74	N/A	0.769142	150.077	6.69	10	0.683861	1.01599e+06	447314	971476	1.23511e+06	1.47808e+06	1.46928e+06	2.03649e+06	1.97643e+06	1.98948e+06	2.84729e+06	2.75873e+06	3.30484e+06
dIMP	333.059	10.91	N/A	4.0356	170.092	11.74	96	0.583942	4.67781e+06	4.57163e+06	5.0593e+06	4.55222e+06	3.90505e+06	4.12762e+06	4.2514e+06	4.56038e+06	3.89195e+06	4.26965e+06	4.48625e+06	3.77115e+06
METHACHOLINE-like	160.133	6.38	70	0.0258107	170.092	7.85	NA	0.583942	1.39502e+09	1.31982e+09	1.48919e+09	1.56974e+09	1.44604e+09	1.42192e+09	1.53337e+09	1.47814e+09	1.54076e+09	1.51988e+09	1.59293e+09	1.40193e+09
PC(38:5)	808.586	1.93	89	-2.29399	170.092	7.1	NA	0.583942	4.92113e+08	4.91191e+08	4.89506e+08	5.72934e+08	5.7597e+08	5.52537e+08	1.01912e+09	1.00748e+09	1.09891e+09	1.05324e+09	9.91665e+08	9.23026e+08
LysoPC(20:0)	552.402	6.1	67	1.32177	138.055	8.85	46	-3.03255	3.93986e+06	3.88785e+06	4.11505e+06	1.22806e+07	1.3254e+07	1.15506e+07	9.71867e+06	1.08922e+07	9.70845e+06	1.7505e+07	1.74414e+07	1.49976e+07
2,6-Dimethylheptanoyl carnitine	302.233	2.72	52	-0.0238193	168.066	1.85	65	-2.29871	1133524	507953	951359	1698266	173455	840234	865188	1435742	828506	1532560	1857279	1893167
Maltol	127.039	13.43	30	1.51099	259.104	5.58	94	3.6376	6267090	5840107	6650486	6261104	5882300	5744089	13398286	13182140	13364541	13615277	13163028	11851346
Decanoylcarnitine	316.248	2.55	65	-0.303947	339.071	11.32	54	-1.86575	2.88031e+06	2.22917e+06	2.73578e+06	1.86815e+06	1.64303e+06	1.91521e+06	2.8394e+06	3.31657e+06	3.34475e+06	2.43315e+06	2.75048e+06	2.54538e+06
5-Hydroxyindoleacetaldehyde	176.071	1.53	30	0.105496	117.102	7.06	28	2.56084	4.03562e+07	4.06754e+07	4.4824e+07	4.69285e+07	4.04594e+07	3.60589e+07	9.70756e+07	8.36334e+07	8.87756e+07	9.07447e+07	9.55405e+07	7.75603e+07
indole-3-acetic acid	176.071	1.53	30	-2.84785	315.059	11.47	N/A	-0.027191	4.03562e+07	4.06754e+07	4.4824e+07	4.69285e+07	4.04594e+07	3.60589e+07	9.70756e+07	8.36334e+07	8.87756e+07	9.07447e+07	9.55405e+07	7.75603e+07
PC(35:5)	766.539	2.53	92	-0.996804	133.086	1.38	22	0.303475	1.0281e+08	9.95402e+07	9.3136e+07	1.11547e+08	1.16367e+08	1.06493e+08	1.01366e+08	1.1279e+08	1.21375e+08	1.11761e+08	1.12847e+08	1.38662e+08
PE(38:5)	766.539	2.53	92	-0.996804	150.077	6.69	10	0.683861	1.0281e+08	9.95402e+07	9.3136e+07	1.11547e+08	1.16367e+08	1.06493e+08	1.01366e+08	1.1279e+08	1.21375e+08	1.11761e+08	1.12847e+08	1.38662e+08
Uridine 5'-diphosphate	405.009	14.17	10	0.732611	166.072	5.09	31	1.5604	31729451	32417749	36657768	35275497	35183627	32283424	32336622	27547776	26911903	34601260	34579094	27824102
PC(35:1)	774.601	2.16	N/A	-2.39596	396.311	2	86	3.22208	5.55981e+08	4.79636e+08	5.60733e+08	6.34815e+08	6.10327e+08	5.93566e+08	4.11574e+08	5.06473e+08	4.47562e+08	5.52774e+08	4.96944e+08	5.27481e+08
PE(38:1)	774.601	2.16	N/A	-2.39596	342.264	2.32	60	0.493169	5.55981e+08	4.79636e+08	5.60733e+08	6.34815e+08	6.10327e+08	5.93566e+08	4.11574e+08	5.06473e+08	4.47562e+08	5.52774e+08	4.96944e+08	5.27481e+08
Capryloylglycine	202.144	3	N/A	-2.43264	358.295	1.96	N/A	0.00302357	2.33497e+06	3.96176e+06	3.30233e+06	3.97709e+06	3.69034e+06	3.00069e+06	2.02375e+06	2.10393e+06	1.86032e+06	2.02737e+06	2.2895e+06	2.14874e+06
Benzenebutanoic acid	165.091	0.83	49	0.640126	412.342	1.88	83	-0.0761732	1.07713e+07	1.01469e+07	8.51583e+06	9.86211e+06	9.75725e+06	9.75753e+06	1.29152e+07	1.07609e+07	1.68781e+07	9.42683e+06	9.62943e+06	1.04647e+07
LysoPC(18:1)	522.356	6.25	100	-0.306145	452.373	1.8	72	-0.746151	549655155	502578972	595562086	733834887	710472124	624056742	639356911	962396565	665771105	602316673	631898786	722552732
Cellobiose	343.123	11.12	N/A	0.309484	448.342	1.83	85	-1.30257	1.33371e+06	1.37248e+06	1.58603e+06	1.5583e+06	1.21072e+06	1.3847e+06	1.30178e+06	1.30362e+06	1.076e+06	1.31114e+06	1.43492e+06	1.29709e+06
D-lactose	343.124	11.12	N/A	-1.206	482.42	1.71	70	0.47556	1.33371e+06	1.37248e+06	1.58603e+06	1.5583e+06	1.21072e+06	1.3847e+06	1.30178e+06	1.30362e+06	1.076e+06	1.31114e+06	1.43492e+06	1.29709e+06
Heptanoylcarnitine	274.202	3.36	69	-1.82379	474.358	1.81	70	0.534767	5.70207e+07	5.22395e+07	6.14411e+07	6.38686e+07	6.42712e+07	6.11823e+07	5.25524e+07	5.3452e+07	5.14429e+07	7.35133e+07	8.03907e+07	6.96099e+07
PC(38:7)	804.554	1.95	82	-0.688168	472.343	1.79	N/A	-1.98274	8.47587e+07	8.53891e+07	8.85771e+07	1.16694e+08	1.1194e+08	1.05549e+08	1.96671e+08	1.85583e+08	1.94431e+08	2.03638e+08	1.92575e+08	1.72095e+08
LysoPC(22:5)	570.356	6.19	92	-1.07915	136.062	3.52	64	-3.41643	2557725	2408670	3043843	5239390	5477136	4677059	3607998	7574871	4619880	5369894	6139346	6847831
Pregnanediol	321.279	0.8	N/A	1.20333	339.07	11.32	54	-1.35693	1.86894e+06	2.25019e+06	1.53132e+06	2.00122e+06	2.45424e+06	2.2345e+06	1.61948e+06	1.31283e+06	1.47425e+06	1.56416e+06	1.64815e+06	945393
diethanolamine	106.087	8.07	57	-1.43573	205.083	11.22	42	-4.28166	1.43738e+08	7.53277e+07	1.506e+08	9.78784e+07	6.92636e+07	2.40351e+08	1.01974e+08	6.37079e+07	3.77701e+07	1.32122e+08	3.95554e+07	3.56224e+07
S-Methyl GSH(S-methylglutathione; L-L-Homoglutathione)	322.107	11.01	54	-1.85707	147.078	10.75	30	-7.1899	2548488	1995346	2739563	5624840	4605445	3259066	1951832	2085560	2020129	2809963	2861152	2285014
PC(p36:4)	766.575	1.81	87	-0.666859	162.077	10.63	100	-2.75699	2.38051e+08	2.34368e+08	2.36889e+08	1.88916e+08	1.99868e+08	1.81578e+08	5.8409e+08	6.21296e+08	6.33563e+08	5.10404e+08	4.64329e+08	4.34623e+08
3-hydroxydodecanoyl carnitine	360.275	4.46	49	-4.63646	138.055	8.85	NA	-3.03255	379607	201957	429282	186138	46950	251474	214797	78306	258602	110765	283236	131147
LysoPE(18:2)	478.293	6.86	22	0.0661446	290.147	12.72	32	-2.87709	587334	708006	623058	527566	787383	779468	807134	1.74727e+06	1.06522e+06	615897	813346	1.17042e+06
Melamine	127.073	5.35	42	1.55661	248.089	12.43	56	-2.93042	3.90198e+06	3.60742e+06	7.25683e+06	3.32421e+06	4.16719e+06	5.73336e+06	3.59812e+06	2.33343e+06	2.84047e+06	6.9841e+06	2.64136e+06	2.551e+06
PC(p38:6)	790.575	1.78	84	-0.373644	290.147	12.72	40	-2.87709	1.9383e+08	1.83374e+08	1.97724e+08	1.4315e+08	1.52323e+08	1.457e+08	4.7621e+08	5.11513e+08	5.28753e+08	3.9498e+08	3.56324e+08	3.57439e+08
Hydroxyhexanoycarnitine	276.181	7.5	72	-1.12856	248.089	12.43	72	-2.93042	6472576	6111904	7645845	6337937	6078529	5615983	5674642	6047375	6151416	5957788	5800364	5427014
His-Ile	269.162	10.38	60	-3.46648	247.13	10.43	34	-1.45747	2036202	1657423	2410321	1924653	1669557	1562829	1670129	1596850	1583469	722955	1504580	1249654
His-Leu	269.162	10.38	58	-3.46648	247.13	10.43	50	-1.45747	2036202	1657423	2410321	1924653	1669557	1562829	1670129	1596850	1583469	722955	1504580	1249654
Ile-His	269.162	10.38	30	-3.46648	231.099	11.22	70	-3.64373	2036202	1657423	2410321	1924653	1669557	1562829	1670129	1596850	1583469	722955	1504580	1249654
Leu-His	269.162	10.38	30	-3.46648	414.322	3.6	80	1.87716	2036202	1657423	2410321	1924653	1669557	1562829	1670129	1596850	1583469	722955	1504580	1249654
Heptadecanoyl carnitine	414.358	1.88	80	-0.155473	442.353	3.25	100	1.63286	3.02056e+07	3.04187e+07	3.73603e+07	2.97958e+07	2.92825e+07	2.57525e+07	2.95691e+07	2.96699e+07	2.73272e+07	3.16444e+07	3.05622e+07	2.71536e+07
4-Methoxycinnamic acid	179.07	3.41	25	0.368197	470.385	3.02	88	-0.0559882	8.0166e+06	7.14155e+06	8.23364e+06	7.6833e+06	7.67376e+06	7.6405e+06	7.40101e+06	7.04559e+06	7.35565e+06	7.28056e+06	8.0826e+06	6.90701e+06
PC(34:3)	756.554	2.21	86	-0.267946	401.341	0.84	N/A	2.97899	412285224	409097800	380889421	352591917	421631963	333224417	393737606	455851322	457306172	418230574	430680328	353420799
S-Adenosylhomocysteine	385.129	10.98	60	-0.593851	202.181	5.36	N/A	-2.49309	3.45402e+07	3.37889e+07	3.92673e+07	3.76202e+07	3.47601e+07	3.34903e+07	3.26987e+07	3.44103e+07	3.22443e+07	3.88278e+07	4.06538e+07	3.13578e+07
ophthalmic acid	290.135	11.12	63	-1.35374	472.342	1.79	N/A	-1.49623	8.70822e+06	8.15639e+06	9.32131e+06	1.2849e+07	1.11962e+07	1.10481e+07	2.06448e+07	1.90954e+07	1.958e+07	2.17273e+07	2.16289e+07	1.87336e+07
AcylCarnitine(12:1)	342.264	2.32	60	0.493169	370.295	2.08	83	-0.65153	168990	162702	327827	416251	244501	212374	455925	209018	401310	N/F	N/F	N/F
Protoporphyrin IX	563.265	1.16	N/A	0.302901	474.358	1.81	70	0.492604	285418	2.98381e+06	3.05986e+06	3.4301e+06	3.53497e+06	2.85755e+06	3.30045e+06	3.09886e+06	3.97781e+06	4.73079e+06	4.44206e+06	3.28834e+06
PC(36:5)	780.554	2.03	90	-0.248537	306.049	10.49	29	0.251882	2.05771e+08	1.91588e+08	2.00685e+08	2.67123e+08	2.78326e+08	2.75334e+08	6.36473e+08	6.47139e+08	6.39172e+08	5.9156e+08	6.18386e+08	5.75708e+08
Indole	118.065	0.91	74	2.43447	244.093	10.52	10	7.01311	1.43942e+08	1.17228e+08	2.02621e+08	1.46645e+08	1.34945e+08	1.82992e+08	1.27929e+08	1.07803e+08	1.23371e+08	1.3955e+08	1.20149e+08	1.0389e+08
3-Methylhistidine isomer2	170.092	7.1	NA	0.583942	244.093	10.52	10	4.88276	31004125	30604371	34428428	34463159	34314201	31030260	25496901	32817154	27872791	29619888	26482254	24111149
AcylCarnitine(19:1)	440.373	1.8	79	0.0626325	615.155	13.17	38	2.32976	7.62211e+06	7.25092e+06	8.74015e+06	6.31981e+06	6.90291e+06	6.11351e+06	7.69351e+06	7.24022e+06	6.07799e+06	6.96472e+06	6.464e+06	5.79685e+06
PC(36:3)	784.586	2.12	94	-0.944443	615.155	15.28	38	2.32976	9.9932e+08	9.9062e+08	1.173e+09	1.05261e+09	1.06476e+09	1.14932e+09	1.06447e+09	1.16156e+09	1.24226e+09	1.26132e+09	1.12861e+09	1.02011e+09
PC(30:0)	706.539	2.55	74	-1.57509	324.059	11.94	44	0.773525	3.04341e+09	2.78852e+09	3.23525e+09	2.9664e+09	3.3572e+09	3.011e+09	2.97534e+09	3.4565e+09	3.41113e+09	3.08735e+09	2.84716e+09	3.09385e+09
Gly-His	213.099	11.92	34	-4.78889	324.059	13.21	44	0.773525	4681263	4516170	5793401	5528600	4885550	4892357	4483358	4332201	4366740	6425409	6103501	5403466
His-Gly	213.099	11.93	58	-4.78889	112.051	13.2	40	-1.44692	4681263	4516170	5818844	5528600	4885550	4892357	4483358	4332201	4366740	6425409	6103501	5403466
PC(32:1)	732.554	2.33	86	-1.03254	112.051	11.94	40	-1.44692	1.33979e+10	1.33784e+10	1.42309e+10	1.53458e+10	1.45645e+10	1.11007e+10	1.30076e+10	1.36777e+10	1.29269e+10	1.51946e+10	1.38981e+10	1.35913e+10
PE(35:1)	732.554	2.33	86	-0.281742	228.098	10.2	30	2.00893	1.33979e+10	1.33784e+10	1.42309e+10	1.53458e+10	1.45645e+10	1.11007e+10	1.30076e+10	1.36777e+10	1.29269e+10	1.51946e+10	1.38981e+10	1.35913e+10
Serotonin	177.102	6.37	23	-5.65941	260.053	12.18	29	0.92472	1017301	735997	570359	1051189	1205663	796371	1782014	1520345	1371579	2133039	1706310	1907985
5,6-dihydrouracil	115.051	10.19	40	-2.88205	205.082	11.22	30	1.03326	6.76201e+06	6.14779e+06	7.07541e+06	8.41764e+06	7.31903e+06	8.00833e+06	6.8405e+06	7.28234e+06	6.97259e+06	7.46114e+06	7.06336e+06	7.24738e+06
N-Methylhydantoin	115.05	10.19	40	1.6377	240.11	10.2	N/A	-1.37307	6.76201e+06	6.14779e+06	7.07541e+06	8.41764e+06	7.31903e+06	8.00833e+06	6.8405e+06	7.28234e+06	6.97259e+06	7.46114e+06	7.06336e+06	7.24738e+06
N,N-Dimethylaniline	122.096	4.22	40	1.79729	154.087	3.65	22	-3.52606	21781590	26456089	28455305	25771332	25557449	26018967	25577468	21108188	20796166	23608511	23699163	18153161
Phenethylamine	122.097	4.22	40	-2.62543	293.098	11.49	86	-1.52575	21781590	26456089	28455305	25771332	25557449	26018967	25577468	21108188	20796166	23608511	23699163	18153161
AcylCarnitine(22:1)	482.42	1.71	70	0.47556	184.097	2.04	10	-2.61287	1165419	1078479	1484776	1233476	1331997	1314725	1027247	859329	1241141	1407224	1173768	1321254
LysoPE(20:4)	502.293	6.71	86	-9.63635	142.027	11.52	31	-3.09536	6282026	6034932	7146723	6691207	7937596	7124125	6009467	15615452	9178958	6713387	6223520	12105492
LysoPC(20:2)	548.372	6.2	71	1.55891	786.164	12.29	99	-5.82667	3.02542e+06	2.9978e+06	3.166e+06	4.42817e+06	4.42323e+06	4.3304e+06	3.31027e+06	5.04943e+06	3.18535e+06	3.21816e+06	4.39071e+06	4.37555e+06
PC(p36:5)	764.559	1.83	84	-0.0771032	422.327	1.92	48	-8.24114	5.11687e+07	5.13682e+07	5.75016e+07	4.15049e+07	4.18213e+07	4.15274e+07	1.73751e+08	1.84058e+08	1.92312e+08	1.33904e+08	1.22056e+08	1.14707e+08
L-Pipecolic acid	130.086	3.23	20	1.0021	276.12	11.92	38	-1.22672	127654135	146449743	142508052	163526764	155458393	157158327	165914980	128627412	170103132	178230935	184078558	143619050
Iminodiacetate(IDA)	190.108	4.79	38	-2.58396	263.088	11.47	70	-2.20862	5693064	10288486	19219870	15961917	9371963	26468001	10219016	7098859	2873512	14941168	555907	1160715
Glycerylphosphorylethanolamine	216.064	11.03	50	-2.01527	276.118	11.92	35	5.83548	3.65497e+08	3.37243e+08	4.00545e+08	4.22869e+08	3.76555e+08	3.67638e+08	3.45894e+08	3.42101e+08	3.46074e+08	3.46268e+08	3.43281e+08	2.92695e+08
LysoPC(18:2)	520.34	6.3	70	1.46668	285.12	12.04	43	-0.120622	18013273	16658648	21729394	24761793	22829157	19016790	19191010	49883331	23274433	17199041	18593143	35164277
PC(38:6)	806.57	1.92	88	-0.741767	261.145	10.31	50	-1.80281	4.98833e+08	4.77757e+08	5.07111e+08	6.54266e+08	6.41449e+08	5.92268e+08	1.29032e+09	1.30323e+09	1.39292e+09	1.3761e+09	1.33711e+09	1.20734e+09
lumichrome	243.088	1.37	69	-1.9728	261.145	10.31	32	-1.80281	1.1214e+06	1.10173e+06	1.45991e+06	1.11823e+06	1.24655e+06	1.30914e+06	1.02859e+06	1.09232e+06	1.17058e+06	1.31954e+06	942957	754891
Caproylcholine	202.181	5.36	N/A	-2.49309	276.156	12.78	34	-0.768621	17069193	26638964	15255394	24857168	25518218	18533621	23549045	24244704	23892627	23513777	18489184	36000519
Asp-Ile	247.13	10.43	34	-1.45747	249.109	11.57	58	-2.6579	336406	7423252	8324520	8518894	6880517	314961	15388172	15783103	1564808	14178979	1898780	11631924
Asp-Leu	247.13	10.43	50	-1.45747	247.129	10.61	36	-1.34522	336406	7423252	8324520	8518894	6880517	314961	15388172	15783103	1564808	14178979	1898780	11631924
L-gamma-glutamyl-L-valine	247.129	10.43	50	-1.34522	173.021	11.13	45	-2.04608	336406	7423252	8324520	8518894	6880517	314961	15388172	15783103	1564808	14178979	1898780	11631924
Cholesterol-H2O	369.352	0.83	80	0.635824	213.099	11.92	34	-4.78889	4.93157e+07	4.77791e+07	1.63925e+07	3.90606e+07	4.24645e+07	4.14117e+07	3.51143e+07	5.38704e+07	6.25349e+07	2.8314e+07	2.66622e+07	4.72187e+07
Lathosterol-H2O	369.352	0.83	80	0.635824	152.057	7.16	58	-2.80191	4.93157e+07	4.77791e+07	1.63925e+07	3.90606e+07	4.24645e+07	4.14117e+07	3.51143e+07	5.38704e+07	6.25349e+07	2.8314e+07	2.66622e+07	4.72187e+07
Indoleacetaldehyde	160.076	6.36	66	-0.993244	227.115	11.38	41	-4.12115	3611677	3118618	3680953	4858489	4653687	4733746	8496406	8882200	8401826	8842930	9642714	9407628
Eicosanoyl-EA	356.352	1.63	81	-0.378751	285.121	12.04	60	-3.94356	2.92485e+07	4.00439e+07	5.401e+07	3.79264e+07	3.93012e+07	4.03224e+07	6.83496e+07	4.16334e+07	4.32686e+07	7.90837e+07	3.42029e+07	4.04916e+07
13Z-Docosenamide/13E-Docosenamide	338.342	0.83	98	-0.331209	213.099	11.93	58	-4.78889	3.38759e+08	6.07011e+08	2.61917e+09	4.12884e+08	5.93511e+08	6.5457e+08	5.95239e+08	4.27838e+08	4.19117e+08	1.44863e+09	1.38593e+09	4.26038e+08
PC(37:6)	792.554	2.02	71	-2.48083	269.162	10.38	60	-3.46648	22476615	21819945	21785535	39813763	37169630	34645446	56775656	57037709	57610434	65309684	64617201	54265835
PC(36:4)	782.57	1.98	82	-0.764515	269.162	10.38	58	-3.46648	5.37794e+08	5.20454e+08	5.26083e+08	6.73145e+08	6.735e+08	6.61981e+08	1.52987e+09	1.54183e+09	1.56763e+09	1.5538e+09	1.51504e+09	1.40813e+09
Ala-His	227.115	11.96	47	-4.12115	276.181	7.5	72	-1.12856	2.16743e+07	2.15716e+07	2.74586e+07	2.14552e+07	1.9584e+07	1.90226e+07	2.19241e+07	2.12277e+07	2.21351e+07	2.71513e+07	2.50847e+07	2.10414e+07
Carnosine	227.114	11.96	80	-1.61141	261.146	10.25	30	-2.15371	2.16743e+07	2.15716e+07	2.74586e+07	2.14552e+07	1.9584e+07	1.90226e+07	2.19241e+07	2.12277e+07	2.21351e+07	2.71513e+07	2.50847e+07	2.10414e+07
L-Proline	116.071	9.64	71	-2.49831	269.162	10.38	30	-3.46648	7.85995e+09	7.71135e+09	8.28981e+09	6.84313e+09	6.82424e+09	6.35883e+09	8.02621e+09	8.06595e+09	8.20587e+09	8.01559e+09	7.61227e+09	7.19965e+09
Ala-Arg	246.157	12.07	70	-3.64812	127.05	10.07	53	1.74402	3.64303e+06	3.18636e+06	4.66586e+06	3.84075e+06	3.78306e+06	3.46494e+06	4.10204e+06	3.98394e+06	4.44964e+06	5.76385e+06	4.85427e+06	4.40963e+06
Arg-Ala	246.157	12.06	45	-3.64812	190.108	4.79	38	-2.58396	3.64303e+06	3.18636e+06	4.66586e+06	3.84075e+06	3.78306e+06	3.46494e+06	4.10204e+06	3.98394e+06	4.44964e+06	5.76385e+06	4.85427e+06	4.40963e+06
L-Histidine trimethylbetaine	198.124	10.76	N/A	-2.56009	160.076	6.36	66	-0.993244	2.31796e+06	2.19303e+06	2.86189e+06	3.07751e+06	2.57858e+06	3.10624e+06	2.40314e+06	2.20362e+06	2.2845e+06	2.16166e+06	2.45558e+06	2.98501e+06
flavin adenine dinucleotide	786.164	12.29	99	-5.82667	122.028	9.86	91	-2.04076	2619372	2532182	3071984	3099180	3149779	2583078	3356847	2449680	3091787	3078136	3114457	2187079
Metformin	130.109	5.45	52	0.577717	261.146	10.31	34	-2.15371	1242830	23773768	603215	504899	714871	797724	3321355	2235741	3420843	5358113	3270195	1921780
CDP-ethanolamine	447.068	13.22	N/A	1.07922	269.162	10.38	30	-3.46648	2.02821e+06	1.92594e+06	2.40847e+06	2.29566e+06	2.00481e+06	2.16528e+06	7.69518e+06	7.38226e+06	6.92705e+06	6.21836e+06	5.38911e+06	4.99506e+06
S-(5'-adenosyl)-L-methionine	399.145	12.72	100	-0.449952	261.145	10.31	50	-1.80281	2.52965e+07	1.55649e+07	1.81214e+07	3.13379e+07	3.04718e+07	1.8733e+07	3.57541e+07	3.74663e+07	3.72255e+07	7.66516e+07	6.18734e+07	4.51505e+07
Cytidine monophosphate N-acetylneuraminic acid-1	615.155	13.17	38	2.32976	261.145	10.31	50	-1.80281	3208677	2965210	3602460	3309981	3068151	3096876	3626024	3227057	3339413	4436886	4034569	3362305
Dodecanoylcarnitine	344.28	2.26	70	-0.0255414	247.129	10.43	50	-1.34522	8.36536e+06	7.62101e+06	1.20827e+07	5.78984e+06	7.59219e+06	6.24468e+06	1.09573e+07	9.52156e+06	1.02676e+07	6.92734e+06	8.37737e+06	7.58979e+06
lauroylcarnitine	344.28	2.26	70	-0.0255414	147.077	10.76	50	-3.3144	8.36536e+06	7.62101e+06	1.20827e+07	5.78984e+06	7.59219e+06	6.24468e+06	1.09573e+07	9.52156e+06	1.02676e+07	6.92734e+06	8.37737e+06	7.58979e+06
Tryptamine	161.107	3.96	39	0.208337	132.102	8.7	67	-3.22541	2512447	3664079	3175597	4124015	2932762	3621595	2757786	2536671	3325194	2473482	2013621	1617748
Hexylresorcinol	195.138	0.84	N/A	0.612423	601.335	8.58	92	0.936534	8.9693e+06	1.39452e+07	1.0385e+07	1.33698e+07	1.27264e+07	1.33897e+07	1.06369e+07	1.02375e+07	9.74549e+06	1.01003e+07	1.007e+07	1.03452e+07
3-methyglutaric acid	147.066	0.91	N/A	-3.45865	130.086	3.23	20	1.0021	6.27628e+06	5.68043e+06	8.3311e+06	7.68207e+06	6.39972e+06	7.68773e+06	6.69537e+06	5.09062e+06	6.77396e+06	6.95241e+06	5.31516e+06	5.13907e+06
Cyclic pyranopterin monophosphate	364.065	12.02	54	0.509948	118.087	9.62	50	-2.96734	1.66127e+07	1.64628e+07	1.91214e+07	1.64986e+07	1.48479e+07	1.45709e+07	1.71195e+07	1.81133e+07	1.46608e+07	1.92651e+07	1.68663e+07	1.64845e+07
guanosine 5'-monophosphate	364.066	12.02	54	-0.918365	276.157	12.78	49	-4.71565	1.66127e+07	1.64628e+07	1.91214e+07	1.64986e+07	1.48479e+07	1.45709e+07	1.71195e+07	1.81133e+07	1.46608e+07	1.92651e+07	1.68663e+07	1.64845e+07
LysoPE(18:1)	480.309	6.81	79	-0.367407	522.356	6.25	100	-0.306145	3.60264e+07	3.34464e+07	3.90046e+07	4.13551e+07	3.79674e+07	3.63466e+07	3.27112e+07	4.60502e+07	3.69631e+07	3.79343e+07	3.62141e+07	4.2223e+07
1-aminocyclopropane-1-carboxylate	102.055	10.91	32	-0.946447	520.34	6.3	70	1.46668	2.75974e+08	2.72742e+08	3.10636e+08	3.0363e+08	2.70348e+08	2.76712e+08	2.99049e+08	2.89997e+08	2.91127e+08	3.10378e+08	2.9742e+08	2.60613e+08
Arg-Asp	290.147	12.72	32	-2.87709	544.34	6.24	66	-3.87596	23223	1209043	171619	2064644	218703	1455701	1916615	267699	274751	2597220	2299025	105423
Asp-Arg	290.147	12.72	40	-2.87709	570.356	6.19	92	-1.07915	23223	1209043	171619	2064644	218703	1455701	1916615	267699	274751	2597220	2299025	105423
S-Adenosylmethionine	399.145	12.72	100	0.852832	568.34	5.83	56	-1.00831	2.52965e+07	1.55649e+07	1.81214e+07	3.13379e+07	3.04718e+07	1.8733e+07	3.57541e+07	3.74663e+07	3.72255e+07	7.66516e+07	6.18734e+07	4.51505e+07
3-Methylphenylacetic acid	151.075	0.84	N/A	0.688241	454.293	6.9	83	-0.707683	3.39934e+06	3.87161e+06	2.86482e+06	3.77667e+06	3.63045e+06	4.09159e+06	3.04011e+06	3.18048e+06	3.42296e+06	3.59187e+06	2.7101e+06	2.48678e+06
2-Methylbutyroylcarnitine; 3-Methylbutyrylcarnitine	246.171	4.72	90	-2.4482	482.325	6.42	30	-0.230149	3.16244e+09	3.15695e+09	3.51056e+09	4.52926e+09	4.41778e+09	4.13842e+09	1.77719e+09	1.80339e+09	1.70355e+09	2.63327e+09	2.75049e+09	2.4775e+09
Nicotinic acid	124.04	2.4	40	-2.78923	502.293	6.71	86	-9.63635	6266083	7092243	9293913	11627430	10341365	8043140	29061611	26931724	28015214	27531037	24915690	26334383
Myristoylcarnitine	372.311	2.05	90	-0.482859	244.167	11.74	50	-3.21268	1.32512e+08	1.32987e+08	1.40059e+08	1.10088e+08	1.06509e+08	9.38553e+07	1.35245e+08	1.37679e+08	1.268e+08	1.27663e+08	1.38442e+08	1.16165e+08
Tetradecanoylcarnitine (predicted)	372.311	2.05	94	-0.536579	248.113	10.74	50	-2.85468	1.32512e+08	1.32987e+08	1.40059e+08	1.10088e+08	1.06509e+08	9.38553e+07	1.35245e+08	1.37679e+08	1.268e+08	1.27663e+08	1.38442e+08	1.16165e+08
7-Methylguanine	166.072	5.09	31	1.5604	127.039	13.43	30	1.51099	21942043	18833221	23203700	23206965	23441197	22147863	22502524	21788713	21387653	24096907	25128110	22100972
Benzylamine	108.081	1.02	20	3.06084	130.109	5.45	52	0.577717	1.60973e+07	1.61178e+07	1.88401e+07	1.58474e+07	1.54983e+07	1.40887e+07	1.54749e+07	1.73933e+07	1.68335e+07	1.58828e+07	1.5999e+07	1.65519e+07
Creatine	132.077	10.2	72	-4.04937	170.093	11.74	96	-2.532	1.0072e+10	9.02906e+09	1.08766e+10	1.1252e+10	1.02393e+10	1.05778e+10	1.00482e+10	9.63884e+09	9.66431e+09	1.10687e+10	1.0886e+10	1.02605e+10
L-Palmitoylcarnitine	400.342	1.92	90	-0.475936	122.096	4.22	40	1.79729	4.97043e+08	4.97706e+08	5.72078e+08	3.59446e+08	3.44671e+08	3.09249e+08	5.40544e+08	5.28789e+08	5.24685e+08	5.10214e+08	4.87646e+08	4.47047e+08
5'-Methylthioadenosine	298.097	1.8	89	-1.94947	247.108	1.55	100	3.22803	3.91788e+07	3.40844e+07	4.38962e+07	3.30926e+07	3.58841e+07	3.026e+07	3.14224e+07	4.30727e+07	3.80019e+07	4.70197e+07	4.1545e+07	4.55854e+07
Urocanic acid	139.051	1.42	43	-3.61326	189.087	9.63	80	0.47555	1.68332e+07	5.80509e+06	3.42732e+07	2.38814e+07	5.11462e+07	1.77036e+07	9.65976e+06	8.24327e+06	2.8032e+07	1.33997e+07	4.13198e+06	3.19279e+07
Picolinic acid	124.039	2.4	40	1.40297	198.088	10.29	67	0.703858	6266083	7092243	9293913	11627430	10341365	8043140	29061611	26931724	28015214	27531037	24915690	26334383
Pivaloylcarnitine	246.171	4.72	90	-2.4482	224.092	2.63	55	2.30871	3.16244e+09	3.15695e+09	3.51056e+09	4.52926e+09	4.41778e+09	4.13842e+09	1.77719e+09	1.80339e+09	1.70355e+09	2.63327e+09	2.75049e+09	2.4775e+09
L-Glutamic acid	148.061	10.91	75	-3.82081	131.118	8.17	74	0.922298	5.52666e+09	5.35053e+09	6.12652e+09	5.97078e+09	5.3371e+09	5.43416e+09	5.90732e+09	5.7081e+09	5.61312e+09	6.09181e+09	5.94102e+09	5.14817e+09
Ornithine	133.098	12.06	67	-2.70735	175.072	9.72	69	-3.33898	5.9425e+07	5.83952e+07	6.66721e+07	5.28413e+07	4.94117e+07	4.95153e+07	5.70142e+07	6.19451e+07	6.2759e+07	6.03882e+07	5.20649e+07	5.09091e+07
Citraconic acid	131.034	10.91	24	1.44139	124.04	2.4	40	-2.78923	1.35594e+07	1.41276e+07	1.60184e+07	1.59517e+07	1.37876e+07	1.41078e+07	1.57387e+07	1.46245e+07	1.41144e+07	1.69655e+07	1.54588e+07	1.40263e+07
Itaconic acid	131.034	10.91	24	1.44139	162.076	10.63	100	0.513067	1.35594e+07	1.41276e+07	1.60184e+07	1.59517e+07	1.37876e+07	1.41078e+07	1.57387e+07	1.46245e+07	1.41144e+07	1.69655e+07	1.54588e+07	1.40263e+07
IS-TFND	472.322	1.54	N/A	-1.37395	184.097	2.04	10	-2.61287	1.99044e+09	1.98132e+09	1.95224e+09	2.1138e+09	1.90618e+09	1.64888e+09	2.17725e+09	1.92339e+09	1.72597e+09	2.07877e+09	1.89022e+09	1.87293e+09
3-hydroxyoctanoyl carnitine	304.212	6.18	62	-1.64036	448.343	1.83	85	-2.507	6382612	6332377	7560246	5507897	5249465	4996795	6401975	6902002	6689315	5400299	6042021	4880633
Acetyl-CoA	810.133	12.21	N/A	1.11139	142.026	11.52	31	0.49052	5.8519e+06	6.42478e+06	7.81444e+06	6.92801e+06	5.10762e+06	6.41116e+06	8.79435e+06	3.00754e+06	7.21251e+06	3.76769e+06	6.26277e+06	2.69987e+06
PC(33:1)	746.57	2.3	79	-0.483122	256.263	0.86	85	0.331194	2.4928e+09	2.54819e+09	2.05675e+09	2.50966e+09	2.89366e+09	2.5743e+09	2.4572e+09	2.04101e+09	2.47532e+09	2.26159e+09	2.46718e+09	2.45274e+09
PC(33:1)/PE(36:1)	746.57	2.3	79	-0.483122	730.539	2.36	94	0.153587	2.4928e+09	2.54819e+09	2.05675e+09	2.50966e+09	2.89366e+09	2.5743e+09	2.4572e+09	2.04101e+09	2.47532e+09	2.26159e+09	2.46718e+09	2.45274e+09
Taurine	126.022	9.67	60	-2.84594	758.57	2.23	85	-0.567436	7.4767e+08	7.07582e+08	7.82206e+08	9.47104e+08	9.1655e+08	8.49154e+08	7.267e+08	7.06611e+08	7.40272e+08	1.1415e+09	1.10136e+09	9.91567e+08
Lys-Pro	244.167	11.74	50	-3.21268	756.554	2.21	86	-0.267946	4096348	3688427	3589328	7659019	6523191	3661348	5476196	2386455	3245972	7389742	5133719	3551344
Coenzyme A	768.122	12.78	N/A	1.02863	764.522	2.54	35	-2.78207	4.39873e+06	3.03094e+06	4.6443e+06	5.13574e+06	6.01697e+06	4.20953e+06	3.7651e+06	4.37406e+06	3.99735e+06	4.36861e+06	3.49616e+06	4.75654e+06
(S)-2,3,4,5-Tetrahydropyridine-2-carboxylate/D-1-Piperideine-2-carboxylic acid	128.071	9.87	N/A	1.65561	792.554	2.02	71	-2.48083	1.98403e+07	2.08628e+07	2.20293e+07	2.0274e+07	1.94578e+07	1.79605e+07	2.03883e+07	2.14823e+07	2.08805e+07	2.11436e+07	2.10662e+07	1.94065e+07
5-oxo-proline	130.05	10.91	60	-2.79099	718.575	2.23	80	-0.951054	1.29571e+09	1.25814e+09	1.43708e+09	1.40763e+09	1.28669e+09	1.27959e+09	1.3642e+09	1.31699e+09	1.3098e+09	1.40092e+09	1.35515e+09	1.53787e+09
Pyroglutamic acid (5-oxoproline)	130.05	10.91	60	1.20746	764.523	2.54	35	-3.50147	1.29571e+09	1.25814e+09	1.43708e+09	1.40763e+09	1.28669e+09	1.27959e+09	1.3642e+09	1.31699e+09	1.3098e+09	1.40092e+09	1.35515e+09	1.53787e+09
3-Methylhistidine isomer1	170.092	7.85	NA	0.583942	122.097	4.22	40	-2.62543	33574264	32685052	39393327	22346679	19965155	18614810	153922099	158834782	151692881	144176426	144660349	135072207
N1-Acetylspermidine	188.176	11	90	0.120746	138.092	2.47	26	-3.6576	2.66262e+07	2.36352e+07	3.04266e+07	1.10262e+07	9.68682e+06	1.00006e+07	2.57587e+08	2.64253e+08	2.59644e+08	1.45153e+08	1.34661e+08	1.2097e+08
AcylCarnitine(22:6)	472.343	1.79	N/A	-1.98274	184.073	11.38	77	-0.091145	137479	N/F	150734	122693	126565	114242	N/F	N/F	218864	160249	224423	138093
Cervonyl carnitine	472.342	1.79	N/A	-1.49623	124.039	2.4	40	1.40297	137479	N/F	150734	122693	126565	114242	N/F	N/F	218864	160249	224423	138093
Docosanoylcarnitine(22:0)	484.437	1.69	2	-0.872712	190.09	1.84	100	-2.58781			117391	77558.2		121306	81089.2		267076	269589	362457	342752
5-amino-1-[3,4-dihydroxy-5-(hydroxymethyl)oxolan-2-yl]imidazole-4-carboxamide	259.104	5.58	94	3.6376	245.115	10.65	31	-5.35879	N/F	N/F	N/F	98589	N/F	N/F	N/F	N/F	N/F	N/F	N/F	N/F
5-aminoimidazole-4-carboxamide-1-beta-d-ribofuranosyl 5'-monophosphate	339.071	11.32	54	-1.86575	164.057	4.42	41	-2.26811	N/F	131820	N/F	175056	N/F	N/F	N/F	N/F	N/F	N/F	N/F	185487
5'-Phosphoribosyl-N-formylglycinamide	315.059	11.47	N/A	-0.027191	89.1078	11.39	42	0.201131	N/F	250579	445337	365648	417289	152248	N/F	N/F	N/F	768391	493158	924790
9,12-Hexadecadienoylcarnitine	396.311	2	86	3.22208	168.066	1.85	65	0.795313	223903	N/F	313161	113734	N/F	N/F	N/F	99342	N/F	N/F	107112	95346
AcylCarnitine(20:4)	448.342	1.83	85	-1.30257	277.139	12.66	83	1.6233	73233	N/F	150215	118377	188602	356208	126875	N/F	N/F	84948	217449	216627
AcylCarnitine(22:5)	474.358	1.81	70	0.534767	177.102	6.37	23	-5.65941	N/F	N/F	N/F	N/F	N/F	N/F	92541	107362	68367	N/F	N/F	N/F
AICAR	339.07	11.32	54	-1.35693	322.107	11.01	54	-1.85707	N/F	131820	N/F	175056	N/F	N/F	N/F	N/F	N/F	N/F	N/F	185487
Asn-Asp	248.089	12.43	56	-2.93042	262.129	9.92	92	-1.49713	25244	N/F	N/F	33640	23102	N/F	31278	N/F	N/F	80185	141865	N/F
Asp-Asn	248.089	12.43	72	-2.93042	249.11	11.58	49	-1.40035	25244	N/F	N/F	33640	23102	N/F	31278	N/F	N/F	80185	141865	N/F
Clupanodonyl carnitine, Adrenyl carnitine;Docosa-4,7,10,13,16-pentaenoyl carnitine	474.358	1.81	70	0.492604	138.055	8.85	46	-3.03255	N/F	N/F	N/F	N/F	N/F	N/F	92541	107362	68367	N/F	N/F	N/F
dihydrobiopterin	240.11	10.2	N/A	-1.37307	161.107	3.96	39	0.208337	N/F	N/F	N/F	N/F	16009	N/F	19057	N/F	N/F	N/F	N/F	N/F
Gamma-linolenyl carnitine; Alpha-linolenyl carnitine	422.327	1.92	48	-8.24114	138.092	2.47	26	-3.6576	N/F	141282	N/F	N/F	61123	N/F	N/F	N/F	N/F	N/F	N/F	N/F
N-Stearoyl tyrosine	448.343	1.83	85	-2.507	405.009	14.17	10	0.732611	73233	N/F	150215	118377	188602	356208	126875	N/F	N/F	84948	217449	216627
Putrescine	89.1078	11.39	42	0.201131	153.041	5.35	47	-3.28446	610922	N/F	498295	N/F	136448	1018139	N/F	N/F	N/F	N/F	N/F	N/F

## Sheet: Supplementary Table S4
Table S5. control_vs_AFB1.deseq2.annot						Supplementary Table S4.The RNA-seq annotation between control and AFB1 group
seq_id	gene_name	description	length	fc(control/AFB1)	log2fc(control/AFB1)	pvalue	padjust	significant	regulate	NC_1_count	NC_2_count	NC_3_count	AFB1_1_count	AFB1_2_count	AFB1_3_count	NC_1_tpm	NC_2_tpm	NC_3_tpm	AFB1_1_tpm	AFB1_2_tpm	AFB1_3_tpm	control_tpm	AFB1_tpm	nr	go	KO_id	KO_name	paths	cog	cog_description	pfam	swissprot	entrez
ENSG00000084674	APOB	apolipoprotein B [Source:HGNC Symbol;Acc:HGNC:603]	14121	2.42283	1.27669	0	0	yes	up	111331	96574	96115	216013	213904	220727	564.13	550.09	538.05	1035.86	1063.02	1080.46	550.757	1059.78	NP_000375.3(apolipoprotein B-100 precursor [Homo sapiens])	GO:0043231(cellular_component:intracellular membrane-bounded organelle); GO:0005319(molecular_function:lipid transporter activity); GO:0120020(molecular_function:cholesterol transfer activity); GO:0034374(biological_process:low-density lipoprotein particle remodeling); GO:0034359(cellular_component:mature chylomicron); GO:0005783(cellular_component:endoplasmic reticulum); GO:0034371(biological_pr…	K14462	APOB	map04979(Cholesterol metabolism); map04977(Vitamin digestion and absorption); map04975(Fat digestion and absorption)	ENOG411104F(S:Function unknown)	ENOG411104F(Apolipoprotein B (Including Ag(X) antigen))	PF01347.22(Vitellogenin_N:Lipoprotein amino terminal region); PF09172.11(DUF1943:Domain of unknown function (DUF1943)); PF06448.11(DUF1081:Domain of Unknown Function (DUF1081)); PF12491.8(ApoB100_C:Apolipoprotein B100 C terminal)	sp|P04114|APOB_HUMAN(Apolipoprotein B-100 OS=Homo sapiens OX=9606 GN=APOB PE=1 SV=2)	338
ENSG00000245532	NEAT1	nuclear paraspeckle assembly transcript 1 [Source:HGNC Symbol;Acc:HGNC:30815]	22743	2.26331	1.17843	0	0	yes	up	14784.9	12490	12444	26650.6	26641.2	26075	355.58	330.19	318.54	606.98	620.95	599.07	334.77	609	EAW74388.1(hCG2018833 [Homo sapiens])	GO:0006310(biological_process:DNA recombination); GO:0032199(biological_process:reverse transcription involved in RNA-mediated transposition); GO:0004519(molecular_function:endonuclease activity); GO:0032197(biological_process:transposition, RNA-mediated); GO:0009036(molecular_function:Type II site-specific deoxyribonuclease activity); GO:0090305(biological_process:nucleic acid phosphodiester bon…				ENOG410YY0X(S:Function unknown); ENOG410YX46(S:Function unknown); ENOG410YYHK(S:Function unknown); ENOG410YZTZ(S:Function unknown); ENOG410Y3WU(S:Function unknown); ENOG410YX7N(S:Function unknown)	ENOG410YY0X(-); ENOG410YX46(-); ENOG410YYHK(-); ENOG410YZTZ(-); ENOG410Y3WU(-); ENOG410YX7N(-)		sp|O00370|LORF2_HUMAN(LINE-1 retrotransposable element ORF2 protein OS=Homo sapiens OX=9606 PE=1 SV=1)	283131
ENSG00000198804	MT-CO1	mitochondrially encoded cytochrome c oxidase I [Source:HGNC Symbol;Acc:HGNC:7419]	1542	3.11656	1.63995	0	0	yes	up	238303	211963	214159	631341	604600	595347	11393.4	11521.3	11391.7	26905.4	26554.2	26163.7	11435.5	26541.1	AAK17768.1(cytochrome c oxidase subunit I (mitochondrion) [Homo sapiens])	GO:1902600(biological_process:hydrogen ion transmembrane transport); GO:0009060(biological_process:aerobic respiration); GO:0016491(molecular_function:oxidoreductase activity); GO:0015990(biological_process:electron transport coupled proton transport); GO:0016021(cellular_component:integral component of membrane); GO:0016020(cellular_component:membrane); GO:0005739(cellular_component:mitochondrio…	K02256	COX1	map04932(Non-alcoholic fatty liver disease (NAFLD)); map04260(Cardiac muscle contraction); map05012(Parkinson disease); map05010(Alzheimer disease); map05016(Huntington disease); map04714(Thermogenesis); map00190(Oxidative phosphorylation)	COG0843(C:Energy production and conversion)	COG0843(Cytochrome C oxidase subunit I)	PF00115.20(COX1:Cytochrome C and Quinol oxidase polypeptide I)	sp|P00395|COX1_HUMAN(Cytochrome c oxidase subunit 1 OS=Homo sapiens OX=9606 GN=MT-CO1 PE=1 SV=1)	4512
ENSG00000151632	AKR1C2	aldo-keto reductase family 1 member C2 [Source:HGNC Symbol;Acc:HGNC:385]	3756	3.7956	1.92433	0	0	yes	up	1723.21	1623.93	1625.77	5535.34	5657.84	5509.37	120.16	122.92	117.82	363.15	387.83	350.74	120.3	367.24	XP_024108711.1(aldo-keto reductase family 1 member C1 homolog isoform X1 [Pongo abelii])	GO:0004033(molecular_function:aldo-keto reductase (NADP) activity); GO:0008106(molecular_function:alcohol dehydrogenase (NADP+) activity); GO:0004032(molecular_function:alditol:NADP+ 1-oxidoreductase activity); GO:0015721(biological_process:bile acid and bile salt transport); GO:0044598(biological_process:doxorubicin metabolic process); GO:0047718(molecular_function:indanol dehydrogenase activity…	K00089	AKR1C2	map00140(Steroid hormone biosynthesis)	COG0656(S:Function unknown)	COG0656(reductase)	PF00248.21(Aldo_ket_red:Aldo/keto reductase family)	sp|P52895|AK1C2_HUMAN(Aldo-keto reductase family 1 member C2 OS=Homo sapiens OX=9606 GN=AKR1C2 PE=1 SV=3)	1646
ENSG00000171759	PAH	phenylalanine hydroxylase [Source:HGNC Symbol;Acc:HGNC:8582]	3759	2.30598	1.20538	0	0	yes	up	13206	11256	11779	25193	24469	24188	470.27	458.7	472.98	914.33	887.31	821.61	467.317	874.417	NP_000268.1(phenylalanine-4-hydroxylase [Homo sapiens])	GO:0008652(biological_process:cellular amino acid biosynthetic process); GO:0004505(molecular_function:phenylalanine 4-monooxygenase activity); GO:0042136(biological_process:neurotransmitter biosynthetic process); GO:0006571(biological_process:tyrosine biosynthetic process); GO:0016714(molecular_function:oxidoreductase activity, acting on paired donors, with incorporation or reduction of molecula…	K00500	phhA, PAH	map00400(Phenylalanine, tyrosine and tryptophan biosynthesis); map00360(Phenylalanine metabolism); map00790(Folate biosynthesis)	COG3186(S:Function unknown)	COG3186(-)	PF00351.21(Biopterin_H:Biopterin-dependent aromatic amino acid hydroxylase); PF01842.25(ACT:ACT domain)	sp|P00439|PH4H_HUMAN(Phenylalanine-4-hydroxylase OS=Homo sapiens OX=9606 GN=PAH PE=1 SV=1)	5053
ENSG00000176658	MYO1D	myosin ID [Source:HGNC Symbol;Acc:HGNC:7598]	5510	4.67805	2.22591	0	0	yes	up	1101	949	986	4244	3982	4326	17.02	16.13	19.46	55.25	55.91	63.59	17.5367	58.25	EAW80221.1(myosin ID, isoform CRA_a [Homo sapiens])	GO:0048306(molecular_function:calcium-dependent protein binding); GO:0010923(biological_process:negative regulation of phosphatase activity); GO:0030425(cellular_component:dendrite); GO:0030424(cellular_component:axon); GO:0005903(cellular_component:brush border); GO:0044853(cellular_component:plasma membrane raft); GO:0005737(cellular_component:cytoplasm); GO:0000146(molecular_function:microfila…	K10356	MYO1		COG5022(T:Signal transduction mechanisms)	COG5022(Cyclin-dependent kinase 5 regulatory subunit)	PF00063.21(Myosin_head:Myosin head (motor domain)); PF06017.13(Myosin_TH1:Unconventional myosin tail, actin- and lipid-binding); PF00612.27(IQ:IQ calmodulin-binding motif)	sp|O94832|MYO1D_HUMAN(Unconventional myosin-Id OS=Homo sapiens OX=9606 GN=MYO1D PE=1 SV=2)	4642
ENSG00000198938	MT-CO3	mitochondrially encoded cytochrome c oxidase III [Source:HGNC Symbol;Acc:HGNC:7422]	784	5.30269	2.40672	0	0	yes	up	23217.3	20914	19902.1	104291	99981.5	95894.6	3351.78	3475.21	3177.26	14309.2	14157.7	13888.1	3334.75	14118.4	ADL31200.1(cytochrome c oxidase subunit III (mitochondrion) [Homo sapiens])	GO:0004129(molecular_function:cytochrome-c oxidase activity); GO:0015453(molecular_function:oxidoreduction-driven active transmembrane transporter activity); GO:0045277(cellular_component:respiratory chain complex IV); GO:1902600(biological_process:hydrogen ion transmembrane transport); GO:0006123(biological_process:mitochondrial electron transport, cytochrome c to oxygen); GO:0016021(cellular_co…	K02262	COX3	map04932(Non-alcoholic fatty liver disease (NAFLD)); map04260(Cardiac muscle contraction); map05012(Parkinson disease); map05010(Alzheimer disease); map05016(Huntington disease); map04714(Thermogenesis); map00190(Oxidative phosphorylation)	COG1845(C:Energy production and conversion)	COG1845(Cytochrome C Oxidase, Subunit III)	PF00510.18(COX3:Cytochrome c oxidase subunit III)	sp|P00414|COX3_HUMAN(Cytochrome c oxidase subunit 3 OS=Homo sapiens OX=9606 GN=MT-CO3 PE=1 SV=2)	4514
ENSG00000087086	FTL	ferritin light chain [Source:HGNC Symbol;Acc:HGNC:3999]	871	2.05772	1.04104	0	0	yes	up	59983	52907	55213	106433	101260	98296	7309.12	7382.29	7443.16	12163.8	11968.7	11950.8	7378.19	12027.7	CAE11873.1(hypothetical protein, partial [Homo sapiens])	GO:0008043(cellular_component:intracellular ferritin complex); GO:0035578(cellular_component:azurophil granule lumen); GO:0055072(biological_process:iron ion homeostasis); GO:0006826(biological_process:iron ion transport); GO:0044754(cellular_component:autolysosome); GO:0005737(cellular_component:cytoplasm); GO:0070062(cellular_component:extracellular exosome); GO:0004322(molecular_function:ferro…	K13625	FTL	map04978(Mineral absorption); map04217(Necroptosis)	ENOG4111WYH(P:Inorganic ion transport and metabolism); ENOG4111Q1M(P:Inorganic ion transport and metabolism)	ENOG4111WYH(Stores iron in a soluble, non-toxic, readily available form. Important for iron homeostasis (By similarity)); ENOG4111Q1M(Stores iron in a soluble, non-toxic, readily available form. Important for iron homeostasis (By similarity))	PF00210.24(Ferritin:Ferritin-like domain)	sp|P02792|FRIL_HUMAN(Ferritin light chain OS=Homo sapiens OX=9606 GN=FTL PE=1 SV=2)	2512
ENSG00000198959	TGM2	transglutaminase 2 [Source:HGNC Symbol;Acc:HGNC:11778]	4970	2.93394	1.55284	0	0	yes	up	3568	3143	3300	8642	8336	8993	59.64	59.5	62.56	137.68	142.51	150.08	60.5667	143.423	NP_004604.2(protein-glutamine gamma-glutamyltransferase 2 isoform a [Homo sapiens])	GO:0018149(biological_process:peptide cross-linking); GO:0005783(cellular_component:endoplasmic reticulum); GO:0003810(molecular_function:protein-glutamine gamma-glutamyltransferase activity); GO:0005886(cellular_component:plasma membrane); GO:0005925(cellular_component:focal adhesion); GO:0031226(cellular_component:intrinsic component of plasma membrane); GO:0051561(biological_process:positive r…	K05625	TGM2	map05016(Huntington disease)	ENOG410XQEZ(S:Function unknown)	ENOG410XQEZ(-)	PF00927.22(Transglut_C:Transglutaminase family, C-terminal ig like domain); PF00868.20(Transglut_N:Transglutaminase family); PF01841.19(Transglut_core:Transglutaminase-like superfamily)	sp|P21980|TGM2_HUMAN(Protein-glutamine gamma-glutamyltransferase 2 OS=Homo sapiens OX=9606 GN=TGM2 PE=1 SV=2)	7052
ENSG00000189056	RELN	reelin [Source:HGNC Symbol;Acc:HGNC:9957]	11571	2.65933	1.41107	0	0	yes	up	10413	9279	9531	23046	22466	23212	82.87	85.13	81.08	167.26	171.5	172.14	83.0267	170.3	NP_005036.2(reelin isoform a precursor [Homo sapiens])	GO:0038026(biological_process:reelin-mediated signaling pathway); GO:0061003(biological_process:positive regulation of dendritic spine morphogenesis); GO:0051968(biological_process:positive regulation of synaptic transmission, glutamatergic); GO:0007616(biological_process:long-term memory); GO:0021517(biological_process:ventral spinal cord development); GO:0032793(biological_process:positive regu…	K06249	RELN	map05165(Human papillomavirus infection); map04510(Focal adhesion); map04151(PI3K-Akt signaling pathway); map04512(ECM-receptor interaction)	ENOG410XQKB(O:Posttranslational modification, protein turnover, chaperones)	ENOG410XQKB(Extracellular matrix serine protease that plays a role in layering of neurons in the cerebral cortex and cerebellum. Regulates microtubule function in neurons and neuronal migration. Affects migration of sympathetic preganglionic neurons in the spinal cord, where it seems to act as a barrier to neuronal migration. Enzymatic activity is important for the modulation of cell adhesion. Bi…	PF07974.13(EGF_2:EGF-like domain); PF02014.16(Reeler:Reeler domain); PF18720.1(EGF_Tenascin:Tenascin EGF domain)	sp|P78509|RELN_HUMAN(Reelin OS=Homo sapiens OX=9606 GN=RELN PE=1 SV=3)	5649
ENSG00000003436	TFPI	tissue factor pathway inhibitor [Source:HGNC Symbol;Acc:HGNC:11760]	3859	3.35605	1.74677	0	0	yes	up	1736.82	1531.68	1489.88	4692.06	4675.38	4744.98	81.5	86.82	74.88	191.72	203.94	211.21	81.0667	202.29	NP_006278.1(tissue factor pathway inhibitor isoform a precursor [Homo sapiens])	GO:0071222(biological_process:cellular response to lipopolysaccharide); GO:0007598(biological_process:blood coagulation, extrinsic pathway); GO:0071383(biological_process:cellular response to steroid hormone stimulus); GO:0007596(biological_process:blood coagulation); GO:0005901(cellular_component:caveola); GO:0007599(biological_process:hemostasis); GO:0032496(biological_process:response to lipop…	K03909	TFPI	map04610(Complement and coagulation cascades)	ENOG410XQNP(O:Posttranslational modification, protein turnover, chaperones)	ENOG410XQNP(serine peptidase inhibitor, Kunitz type)	PF00014.23(Kunitz_BPTI:Kunitz/Bovine pancreatic trypsin inhibitor domain)	sp|P10646|TFPI1_HUMAN(Tissue factor pathway inhibitor OS=Homo sapiens OX=9606 GN=TFPI PE=1 SV=1)	7035
ENSG00000275993	SIK1B	salt inducible kinase 1B (putative) [Source:HGNC Symbol;Acc:HGNC:52389]	4747	3.0987	1.63166	0	0	yes	up	7380.8	6778.52	6707.06	19186.8	18022.6	19989.5	115.36	119.3	115.96	283.52	275.92	302.65	116.873	287.363	NP_001307572.1(probable serine/threonine-protein kinase SIK1B [Homo sapiens])	GO:0043276(biological_process:anoikis); GO:0016310(biological_process:phosphorylation); GO:0008140(molecular_function:cAMP response element binding protein binding); GO:0032792(biological_process:negative regulation of CREB transcription factor activity); GO:0010868(biological_process:negative regulation of triglyceride biosynthetic process); GO:0000226(biological_process:microtubule cytoskeleton…	K19008	SIK1	map04922(Glucagon signaling pathway)	ENOG410XNQ0(T:Signal transduction mechanisms)	ENOG410XNQ0(CAMK family protein kinase)	PF00069.25(Pkinase:Protein kinase domain); PF07714.17(Pkinase_Tyr:Protein tyrosine kinase); PF14531.6(Kinase-like:Kinase-like); PF12330.8(Haspin_kinase:Haspin like kinase domain)	sp|A0A0B4J2F2|SIK1B_HUMAN(Probable serine/threonine-protein kinase SIK1B OS=Homo sapiens OX=9606 GN=SIK1B PE=3 SV=1)	102724428
ENSG00000155660	PDIA4	protein disulfide isomerase family A member 4 [Source:HGNC Symbol;Acc:HGNC:30167]	2921	2.11441	1.08026	0	0	yes	up	8431	7427	7602	14703	14338	14811	238.36	235.66	238.86	391.5	394.57	404.47	237.627	396.847	XP_006716248.1(protein disulfide-isomerase A4 isoform X1 [Homo sapiens])	GO:0042470(cellular_component:melanosome); GO:0006457(biological_process:protein folding); GO:0005783(cellular_component:endoplasmic reticulum); GO:0016853(molecular_function:isomerase activity); GO:0009306(biological_process:protein secretion); GO:0009986(cellular_component:cell surface); GO:0005788(cellular_component:endoplasmic reticulum lumen); GO:0005623(cellular_component:cell); GO:0003756(…	K09582	PDIA4, ERP72	map04918(Thyroid hormone synthesis); map04141(Protein processing in endoplasmic reticulum); map05110(Vibrio cholerae infection)	COG0526(O:Posttranslational modification, protein turnover, chaperones)	COG0526(Thioredoxin)	PF00085.20(Thioredoxin:Thioredoxin); PF13848.6(Thioredoxin_6:Thioredoxin-like domain); PF04756.13(OST3_OST6:OST3 / OST6 family, transporter family); PF13098.6(Thioredoxin_2:Thioredoxin-like domain); PF01216.17(Calsequestrin:Calsequestrin); PF13728.6(TraF:F plasmid transfer operon protein)	sp|P13667|PDIA4_HUMAN(Protein disulfide-isomerase A4 OS=Homo sapiens OX=9606 GN=PDIA4 PE=1 SV=2)	9601
ENSG00000167996	FTH1	ferritin heavy chain 1 [Source:HGNC Symbol;Acc:HGNC:3976]	825	2.87943	1.52578	0	0	yes	up	23015.9	20452.2	20834.3	55775.7	52956.7	55000.4	2139.24	2193.43	2224.92	5307.38	5274.54	5310.49	2185.86	5297.47	AAH70494.1(FTH1 protein, partial [Homo sapiens])	GO:0048147(biological_process:negative regulation of fibroblast proliferation); GO:1904813(cellular_component:ficolin-1-rich granule lumen); GO:0008043(cellular_component:intracellular ferritin complex); GO:0006826(biological_process:iron ion transport); GO:0044754(cellular_component:autolysosome); GO:0016491(molecular_function:oxidoreductase activity); GO:0005737(cellular_component:cytoplasm); G…	K00522	FTH1	map04978(Mineral absorption); map04217(Necroptosis)	COG1528(P:Inorganic ion transport and metabolism)	COG1528(Stores iron in a soluble, non-toxic, readily available form. Important for iron homeostasis (By similarity))	PF00210.24(Ferritin:Ferritin-like domain)	sp|P02794|FRIH_HUMAN(Ferritin heavy chain OS=Homo sapiens OX=9606 GN=FTH1 PE=1 SV=2)	2495
ENSG00000068366	ACSL4	acyl-CoA synthetase long chain family member 4 [Source:HGNC Symbol;Acc:HGNC:3571]	4971	2.67383	1.41891	0	0	yes	up	7863	6871	6664	16902	16944	16695	126.12	124.29	118.88	254.57	268.59	263.99	123.097	262.383	XP_023438696.1(long-chain-fatty-acid--CoA ligase 4 isoform X1 [Dasypus novemcinctus])	GO:0005741(cellular_component:mitochondrial outer membrane); GO:0102391(molecular_function:decanoate--CoA ligase activity); GO:0016020(cellular_component:membrane); GO:0030307(biological_process:positive regulation of cell growth); GO:0031957(molecular_function:very long-chain fatty acid-CoA ligase activity); GO:0005789(cellular_component:endoplasmic reticulum membrane); GO:0035338(biological_pro…	K01897	ACSL, fadD	map04714(Thermogenesis); map03320(PPAR signaling pathway); map04920(Adipocytokine signaling pathway); map00061(Fatty acid biosynthesis); map00071(Fatty acid degradation); map04146(Peroxisome)	COG1022(I:Lipid transport and metabolism)	COG1022(Amp-dependent synthetase and ligase)	PF00501.28(AMP-binding:AMP-binding enzyme); PF13193.6(AMP-binding_C:AMP-binding enzyme C-terminal domain)	sp|O60488|ACSL4_HUMAN(Long-chain-fatty-acid--CoA ligase 4 OS=Homo sapiens OX=9606 GN=ACSL4 PE=1 SV=2)	2182
ENSG00000044574	HSPA5	heat shock protein family A (Hsp70) member 5 [Source:HGNC Symbol;Acc:HGNC:5238]	3921	2.08295	1.05863	0	0	yes	up	15332.1	13429	13395	26071	25510	26014	296.02	292.27	285.84	476.12	482.57	487.43	291.377	482.04	XP_003785350.1(78 kDa glucose-regulated protein [Otolemur garnettii])	GO:0005783(cellular_component:endoplasmic reticulum); GO:0034605(biological_process:cellular response to heat); GO:0005788(cellular_component:endoplasmic reticulum lumen); GO:0005789(cellular_component:endoplasmic reticulum membrane); GO:0008180(cellular_component:COP9 signalosome); GO:0006986(biological_process:response to unfolded protein); GO:0006983(biological_process:ER overload response); G…	K09490	HSPA5, BIP	map04918(Thyroid hormone synthesis); map03060(Protein export); map04141(Protein processing in endoplasmic reticulum); map05020(Prion diseases)	COG0443(S:Function unknown)	COG0443(Kelch domain containing)	PF00012.20(HSP70:Hsp70 protein); PF06723.13(MreB_Mbl:MreB/Mbl protein)	sp|P11021|BIP_HUMAN(Endoplasmic reticulum chaperone BiP OS=Homo sapiens OX=9606 GN=HSPA5 PE=1 SV=2)	3309
ENSG00000196975	ANXA4	annexin A4 [Source:HGNC Symbol;Acc:HGNC:542]	2651	2.49548	1.31931	0	0	yes	up	5691	5168	5273	12083	11804	11726	216.51	221.99	227.08	440.61	424.97	425.53	221.86	430.37	NP_001144.1(annexin A4 isoform a [Homo sapiens])	GO:0048306(molecular_function:calcium-dependent protein binding); GO:0035374(molecular_function:chondroitin sulfate binding); GO:0004859(molecular_function:phospholipase inhibitor activity); GO:0007165(biological_process:signal transduction); GO:0043086(biological_process:negative regulation of catalytic activity); GO:0005737(cellular_component:cytoplasm); GO:0007219(biological_process:Notch sign…	K17093	ANXA4		ENOG410XPUN(S:Function unknown)	ENOG410XPUN(annexin A7)	PF00191.20(Annexin:Annexin)	sp|P09525|ANXA4_HUMAN(Annexin A4 OS=Homo sapiens OX=9606 GN=ANXA4 PE=1 SV=4)	307
ENSG00000135094	SDS	serine dehydratase [Source:HGNC Symbol;Acc:HGNC:10691]	1605	13.1635	3.71847	0	0	yes	up	278	218	238	2802	2796	2934	15.67	14.77	15.66	150.26	153.46	158.39	15.3667	154.037	EAW98055.1(serine dehydratase, isoform CRA_b [Homo sapiens])	GO:0006567(biological_process:threonine catabolic process); GO:0005737(cellular_component:cytoplasm); GO:0006565(biological_process:L-serine catabolic process); GO:0019518(biological_process:L-threonine catabolic process to glycine); GO:0005829(cellular_component:cytosol); GO:0006520(biological_process:cellular amino acid metabolic process); GO:0005739(cellular_component:mitochondrion); GO:004286…	K17989	SDS, SDH, CHA1	map00270(Cysteine and methionine metabolism); map00260(Glycine, serine and threonine metabolism); map00290(Valine, leucine and isoleucine biosynthesis)	COG1171(E:Amino acid transport and metabolism)	COG1171(Threonine dehydratase)	PF00291.25(PALP:Pyridoxal-phosphate dependent enzyme)	sp|P20132|SDHL_HUMAN(L-serine dehydratase/L-threonine deaminase OS=Homo sapiens OX=9606 GN=SDS PE=1 SV=2)	10993
ENSG00000123384	LRP1	LDL receptor related protein 1 [Source:HGNC Symbol;Acc:HGNC:6692]	14923	3.10804	1.636	0	0	yes	up	3979	3682	3871	10607	10186	10937	24.86	25.82	28.28	60.35	60.61	67.24	26.32	62.7333	NP_002323.2(prolow-density lipoprotein receptor-related protein 1 preproprotein [Homo sapiens])	GO:0035774(biological_process:positive regulation of insulin secretion involved in cellular response to glucose stimulus); GO:0006909(biological_process:phagocytosis); GO:0030226(molecular_function:apolipoprotein receptor activity); GO:0030425(cellular_component:dendrite); GO:0043524(biological_process:negative regulation of neuron apoptotic process); GO:0051895(biological_process:negative regula…	K04550	LRP1, CD91	map05010(Alzheimer disease); map04979(Cholesterol metabolism); map05144(Malaria)	ENOG410XP34(K:Transcription)	ENOG410XP34(signal transducer and activator of transcription)	PF00057.18(Ldl_recept_a:Low-density lipoprotein receptor domain class A); PF00058.17(Ldl_recept_b:Low-density lipoprotein receptor repeat class B); PF14670.6(FXa_inhibition:Coagulation Factor Xa inhibitory site); PF16472.5(DUF5050:Domain of unknown function (DUF5050)); PF08450.12(SGL:SMP-30/Gluconolactonase/LRE-like region); PF12662.7(cEGF:Complement Clr-like EGF-like); PF07645.15(EGF_CA:Calcium-…	sp|Q07954|LRP1_HUMAN(Prolow-density lipoprotein receptor-related protein 1 OS=Homo sapiens OX=9606 GN=LRP1 PE=1 SV=2)	4035
ENSG00000168209	DDIT4	DNA damage inducible transcript 4 [Source:HGNC Symbol;Acc:HGNC:24944]	1744	4.32409	2.1124	0	0	yes	up	1464	1322	1324	5308	5159	5247	75.88	76.45	76.18	255.56	262.81	256.5	76.17	258.29	NP_061931.1(DNA damage-inducible transcript 4 protein [Homo sapiens])	GO:0033137(biological_process:negative regulation of peptidyl-serine phosphorylation); GO:0010801(biological_process:negative regulation of peptidyl-threonine phosphorylation); GO:0048011(biological_process:neurotrophin TRK receptor signaling pathway); GO:0001764(biological_process:neuron migration); GO:0001666(biological_process:response to hypoxia); GO:0005737(cellular_component:cytoplasm); GO:…	K08270	DDIT4, REDD1	map05206(MicroRNAs in cancer); map04150(mTOR signaling pathway); map04151(PI3K-Akt signaling pathway); map04140(Autophagy - animal)	ENOG4111N0W(O:Posttranslational modification, protein turnover, chaperones)	ENOG4111N0W(negative regulation of peptidyl-threonine phosphorylation)	PF07809.11(RTP801_C:RTP801 C-terminal region)	sp|Q9NX09|DDIT4_HUMAN(DNA damage-inducible transcript 4 protein OS=Homo sapiens OX=9606 GN=DDIT4 PE=1 SV=1)	54541
ENSG00000198786	MT-ND5	mitochondrially encoded NADH:ubiquinone oxidoreductase core subunit 5 [Source:HGNC Symbol;Acc:HGNC:7461]	1812	3.75638	1.90934	0	0	yes	up	73947.4	67081.2	66272.5	238507	224637	225699	1331.41	1328.98	1317.51	4139.19	4069.95	3982.93	1325.97	4064.02	AFO26771.1(NADH dehydrogenase subunit 5 (mitochondrion) [Homo sapiens])	GO:0016020(cellular_component:membrane); GO:0032981(biological_process:mitochondrial respiratory chain complex I assembly); GO:0008137(molecular_function:NADH dehydrogenase (ubiquinone) activity); GO:0016021(cellular_component:integral component of membrane); GO:0042542(biological_process:response to hydrogen peroxide); GO:0005739(cellular_component:mitochondrion); GO:0006120(biological_process:m…	K03883	ND5	map05012(Parkinson disease); map00190(Oxidative phosphorylation); map04723(Retrograde endocannabinoid signaling); map04714(Thermogenesis)	COG1009(C:Energy production and conversion)	COG1009(subunit l)	PF00361.20(Proton_antipo_M:Proton-conducting membrane transporter); PF06455.11(NADH5_C:NADH dehydrogenase subunit 5 C-terminus); PF00662.20(Proton_antipo_N:NADH-Ubiquinone oxidoreductase (complex I), chain 5 N-terminus)	sp|P03915|NU5M_HUMAN(NADH-ubiquinone oxidoreductase chain 5 OS=Homo sapiens OX=9606 GN=MT-ND5 PE=1 SV=2)	4540
ENSG00000198886	MT-ND4	mitochondrially encoded NADH:ubiquinone oxidoreductase core subunit 4 [Source:HGNC Symbol;Acc:HGNC:7459]	1378	6.21358	2.63542	0	0	yes	up	26056.5	23149.2	23554.9	138992	132554	128314	1684.24	1700.51	1684.61	8476.34	8360.8	8154.55	1689.79	8330.56	AUG82966.1(NADH dehydrogenase subunit 4 (mitochondrion) [Homo sapiens])	GO:0009060(biological_process:aerobic respiration); GO:0001666(biological_process:response to hypoxia); GO:0003954(molecular_function:NADH dehydrogenase activity); GO:0001701(biological_process:in utero embryonic development); GO:0015990(biological_process:electron transport coupled proton transport); GO:0032981(biological_process:mitochondrial respiratory chain complex I assembly); GO:0016021(ce…	K03881	ND4	map05012(Parkinson disease); map00190(Oxidative phosphorylation); map04723(Retrograde endocannabinoid signaling); map04714(Thermogenesis)	COG1008(C:Energy production and conversion)	COG1008(subunit m)	PF00361.20(Proton_antipo_M:Proton-conducting membrane transporter); PF01059.17(Oxidored_q5_N:NADH-ubiquinone oxidoreductase chain 4, amino terminus)	sp|P03905|NU4M_HUMAN(NADH-ubiquinone oxidoreductase chain 4 OS=Homo sapiens OX=9606 GN=MT-ND4 PE=1 SV=1)	4538
ENSG00000198763	MT-ND2	mitochondrially encoded NADH:ubiquinone oxidoreductase core subunit 2 [Source:HGNC Symbol;Acc:HGNC:7456]	1042	2.4433	1.28883	0	0	yes	up	33293.1	29443.8	28770.8	68394.2	66008.3	63210.6	3119.79	3152.13	2985.11	6036.91	6020.18	5873.17	3085.68	5976.75	AEV49815.1(NADH dehydrogenase subunit 2 (mitochondrion) [Homo sapiens])	GO:0072593(biological_process:reactive oxygen species metabolic process); GO:0035255(molecular_function:ionotropic glutamate receptor binding); GO:0032981(biological_process:mitochondrial respiratory chain complex I assembly); GO:0008137(molecular_function:NADH dehydrogenase (ubiquinone) activity); GO:0016021(cellular_component:integral component of membrane); GO:0016020(cellular_component:membra…	K03879	ND2	map05012(Parkinson disease); map00190(Oxidative phosphorylation); map04723(Retrograde endocannabinoid signaling); map04714(Thermogenesis)	COG1009(C:Energy production and conversion); COG1007(C:Energy production and conversion)	COG1009(subunit l); COG1007(NDH-1 shuttles electrons from NADH, via FMN and iron- sulfur (Fe-S) centers, to quinones in the respiratory chain. The immediate electron acceptor for the enzyme in this species is believed to be ubiquinone. Couples the redox reaction to proton translocation (for every two electrons transferred, four hydrogen ions are translocated across the cytoplasmic membrane), and …	PF00361.20(Proton_antipo_M:Proton-conducting membrane transporter); PF06444.11(NADH_dehy_S2_C:NADH dehydrogenase subunit 2 C-terminus)	sp|P03891|NU2M_HUMAN(NADH-ubiquinone oxidoreductase chain 2 OS=Homo sapiens OX=9606 GN=MT-ND2 PE=1 SV=2)	4536
ENSG00000100316	RPL3	ribosomal protein L3 [Source:HGNC Symbol;Acc:HGNC:10332]	1296	2.52882	1.33846	0	0	yes	up	10067.5	9174.35	9596.28	22057.3	21163.3	21327.5	740.9	763.94	776.29	1503.99	1490.45	1525.21	760.377	1506.55	XP_004373929.2(60S ribosomal protein L3 [Trichechus manatus latirostris])	GO:0000184(biological_process:nuclear-transcribed mRNA catabolic process, nonsense-mediated decay); GO:0022625(cellular_component:cytosolic large ribosomal subunit); GO:0019083(biological_process:viral transcription); GO:0006614(biological_process:SRP-dependent cotranslational protein targeting to membrane); GO:0045202(cellular_component:synapse); GO:0005925(cellular_component:focal adhesion); GO…	K02925	RP-L3e, RPL3	map03010(Ribosome)	COG0087(J:Translation, ribosomal structure and biogenesis)	COG0087(One of the primary rRNA binding proteins, it binds directly near the 3'-end of the 23S rRNA, where it nucleates assembly of the 50S subunit (By similarity))	PF00297.22(Ribosomal_L3:Ribosomal protein L3)	sp|P39023|RL3_HUMAN(60S ribosomal protein L3 OS=Homo sapiens OX=9606 GN=RPL3 PE=1 SV=2)	6122
ENSG00000185630	PBX1	PBX homeobox 1 [Source:HGNC Symbol;Acc:HGNC:8632]	6636	3.00955	1.58955	0	0	yes	up	2227	1908.03	1918	5309	5483	5299	32.43	29.89	34.06	70.54	75.2	70.93	32.1267	72.2233	NP_002576.1(pre-B-cell leukemia transcription factor 1 isoform 1 [Homo sapiens])	GO:0042127(biological_process:regulation of cell proliferation); GO:0030325(biological_process:adrenal gland development); GO:0030326(biological_process:embryonic limb morphogenesis); GO:0048568(biological_process:embryonic organ development); GO:0030154(biological_process:cell differentiation); GO:0035162(biological_process:embryonic hemopoiesis); GO:0001658(biological_process:branching involved…	K09355	PBX1	map04934(Cushing syndrome); map05202(Transcriptional misregulation in cancer); map04927(Cortisol synthesis and secretion)	ENOG410XRVF(K:Transcription)	ENOG410XRVF(Pre-B-cell leukemia homeobox)	PF03792.13(PBC:PBC domain); PF00046.29(Homeodomain:Homeodomain); PF05920.11(Homeobox_KN:Homeobox KN domain)	sp|P40424|PBX1_HUMAN(Pre-B-cell leukemia transcription factor 1 OS=Homo sapiens OX=9606 GN=PBX1 PE=1 SV=1)	5087
ENSG00000130707	ASS1	argininosuccinate synthase 1 [Source:HGNC Symbol;Acc:HGNC:758]	1548	3.01983	1.59447	0	0	yes	up	11487	10218	10493	29279	27626	29086	656.96	659.01	662.55	1572.15	1533.66	1623.88	659.507	1576.56	XP_003822421.1(argininosuccinate synthase isoform X1 [Pan paniscus])	GO:0004055(molecular_function:argininosuccinate synthase activity); GO:0071320(biological_process:cellular response to cAMP); GO:0071222(biological_process:cellular response to lipopolysaccharide); GO:0015643(molecular_function:toxic substance binding); GO:0071242(biological_process:cellular response to ammonium ion); GO:0001822(biological_process:kidney development); GO:0045429(biological_proces…	K01940	argG, ASS1	map00220(Arginine biosynthesis); map00250(Alanine, aspartate and glutamate metabolism); map05418(Fluid shear stress and atherosclerosis)	COG0137(E:Amino acid transport and metabolism)	COG0137(Citrulline--aspartate ligase)	PF00764.19(Arginosuc_synth:Arginosuccinate synthase); PF06508.13(QueC:Queuosine biosynthesis protein QueC)	sp|P00966|ASSY_HUMAN(Argininosuccinate synthase OS=Homo sapiens OX=9606 GN=ASS1 PE=1 SV=2)	445
ENSG00000162105	SHANK2	SH3 and multiple ankyrin repeat domains 2 [Source:HGNC Symbol;Acc:HGNC:14295]	9062	9.3481	3.22467	0	0	yes	up	283	275	276	2347	2156	2396	2.95	4.08	4.21	19.49	19.1	19.77	3.74667	19.4533	NP_036441.2(SH3 and multiple ankyrin repeat domains protein 2 isoform 1 [Homo sapiens])	GO:0051124(biological_process:synaptic growth at neuromuscular junction); GO:0030159(molecular_function:receptor signaling complex scaffold activity); GO:0099562(biological_process:maintenance of postsynaptic density structure); GO:0060170(cellular_component:ciliary membrane); GO:0044309(cellular_component:neuron spine); GO:0007612(biological_process:learning); GO:0017124(molecular_function:SH3 d…	K15009	SHANK	map04724(Glutamatergic synapse)	COG0666(S:Function unknown)	COG0666(Ankyrin Repeat)	PF12796.7(Ank_2:Ankyrin repeats (3 copies)); PF00536.30(SAM_1:SAM domain (Sterile alpha motif)); PF07647.17(SAM_2:SAM domain (Sterile alpha motif)); PF13637.6(Ank_4:Ankyrin repeats (many copies)); PF13857.6(Ank_5:Ankyrin repeats (many copies)); PF07653.17(SH3_2:Variant SH3 domain); PF17820.1(PDZ_6:PDZ domain); PF14604.6(SH3_9:Variant SH3 domain); PF00595.24(PDZ:PDZ domain); PF16511.5(FERM_f0:N-te…	sp|Q9UPX8|SHAN2_HUMAN(SH3 and multiple ankyrin repeat domains protein 2 OS=Homo sapiens OX=9606 GN=SHANK2 PE=1 SV=3)	22941
ENSG00000214049	UCA1	urothelial cancer associated 1 [Source:HGNC Symbol;Acc:HGNC:37126]	2688	2.15589	1.10828	0	0	yes	up	11942.2	10304	10323.1	21280.1	20353	20404	738.42	718.56	698.9	1269.3	1253.07	1277.67	718.627	1266.68	ABB79954.1(UCA1 protein [Homo sapiens])	GO:0008233(molecular_function:peptidase activity); GO:0004190(molecular_function:aspartic-type endopeptidase activity)				ENOG4110P1W(S:Function unknown)	ENOG4110P1W(-)		sp|Q98298|MC132_MCV1(Protein MC132 OS=Molluscum contagiosum virus subtype 1 OX=10280 GN=MC132 PE=1 SV=1)
ENSG00000018236	CNTN1	contactin 1 [Source:HGNC Symbol;Acc:HGNC:2171]	5667	3.00228	1.58606	0	0	yes	up	5587	4691	4679	13395	13207	13046	99.03	80.44	82.11	197.74	203.7	201.26	87.1933	200.9	XP_015006914.2(contactin-1 isoform X1 [Macaca mulatta])	GO:0010765(biological_process:positive regulation of sodium ion transport); GO:0007219(biological_process:Notch signaling pathway); GO:0070062(cellular_component:extracellular exosome); GO:0007399(biological_process:nervous system development); GO:0050731(biological_process:positive regulation of peptidyl-tyrosine phosphorylation); GO:0016020(cellular_component:membrane); GO:0030246(molecular_fun…	K06759	CNTN1	map04514(Cell adhesion molecules (CAMs))	ENOG410XSVG(S:Function unknown)	ENOG410XSVG(oligomeric mucus gel-forming)	PF13927.6(Ig_3:Immunoglobulin domain); PF07679.16(I-set:Immunoglobulin I-set domain); PF13895.6(Ig_2:Immunoglobulin domain); PF00047.25(ig:Immunoglobulin domain); PF00041.21(fn3:Fibronectin type III domain); PF07686.17(V-set:Immunoglobulin V-set domain); PF16656.5(Pur_ac_phosph_N:Purple acid Phosphatase, N-terminal domain)	sp|Q12860|CNTN1_HUMAN(Contactin-1 OS=Homo sapiens OX=9606 GN=CNTN1 PE=1 SV=1)	1272
ENSG00000169710	FASN	fatty acid synthase [Source:HGNC Symbol;Acc:HGNC:3594]	8464	2.94376	1.55766	0	0	yes	up	7528	6624	6860	18126	17263	19296	99.14	99.23	105.25	214.89	224.3	232.25	101.207	223.813	NP_004095.4(fatty acid synthase [Homo sapiens])	GO:0006633(biological_process:fatty acid biosynthetic process); GO:0047451(molecular_function:3-hydroxyoctanoyl-[acyl-carrier-protein] dehydratase activity); GO:0006631(biological_process:fatty acid metabolic process); GO:0016020(cellular_component:membrane); GO:0005829(cellular_component:cytosol); GO:0016787(molecular_function:hydrolase activity); GO:0030224(biological_process:monocyte different…	K00665	FASN	map04910(Insulin signaling pathway); map00061(Fatty acid biosynthesis); map04152(AMPK signaling pathway)	COG3321(J:Translation, ribosomal structure and biogenesis)	COG3321(Catalyzes the synthesis of dihydrouridine a modified base found in the D-loop of most tRNAs (By similarity))	PF00698.21(Acyl_transf_1:Acyl transferase domain); PF00109.26(ketoacyl-synt:Beta-ketoacyl synthase, N-terminal domain); PF00975.20(Thioesterase:Thioesterase domain); PF08659.10(KR:KR domain); PF02801.22(Ketoacyl-synt_C:Beta-ketoacyl synthase, C-terminal domain); PF16197.5(KAsynt_C_assoc:Ketoacyl-synthetase C-terminal extension); PF14765.6(PS-DH:Polyketide synthase dehydratase); PF00107.26(ADH_zin…	sp|P49327|FAS_HUMAN(Fatty acid synthase OS=Homo sapiens OX=9606 GN=FASN PE=1 SV=3)	2194
ENSG00000154229	PRKCA	protein kinase C alpha [Source:HGNC Symbol;Acc:HGNC:9393]	8964	5.72587	2.5175	0	0	yes	up	724	636	696	3520	3444	3447	6.09	6.2	6.29	26.97	27.68	27.08	6.19333	27.2433	NP_002728.2(protein kinase C alpha type [Homo sapiens])	GO:0018107(biological_process:peptidyl-threonine phosphorylation); GO:0018105(biological_process:peptidyl-serine phosphorylation); GO:0005783(cellular_component:endoplasmic reticulum); GO:0097190(biological_process:apoptotic signaling pathway); GO:0016310(biological_process:phosphorylation); GO:0002159(biological_process:desmosome assembly); GO:0034351(biological_process:negative regulation of gl…	K02677	PRKCA	map05214(Glioma); map05164(Influenza A); map04650(Natural killer cell mediated cytotoxicity); map05163(Human cytomegalovirus infection); map04750(Inflammatory mediator regulation of TRP channels); map05161(Hepatitis B); map04015(Rap1 signaling pathway); map04014(Ras signaling pathway); map04540(Gap junction); map04010(MAPK signaling pathway); map04012(ErbB signaling pathway); map04360(Axon guidan…	ENOG410XNPH(S:Function unknown)	ENOG410XNPH(-)	PF00069.25(Pkinase:Protein kinase domain); PF07714.17(Pkinase_Tyr:Protein tyrosine kinase); PF00130.22(C1_1:Phorbol esters/diacylglycerol binding domain (C1 domain)); PF00168.30(C2:C2 domain); PF00433.24(Pkinase_C:Protein kinase C terminal domain)	sp|P17252|KPCA_HUMAN(Protein kinase C alpha type OS=Homo sapiens OX=9606 GN=PRKCA PE=1 SV=4)	5578
ENSG00000019186	CYP24A1	cytochrome P450 family 24 subfamily A member 1 [Source:HGNC Symbol;Acc:HGNC:2602]	3278	12.9497	3.69485	0	0	yes	up	1535	1315	1322	16002	15567	16163	47.46	47.48	41.24	456.37	452.88	448.62	45.3933	452.623	XP_009214176.2(1,25-dihydroxyvitamin D(3) 24-hydroxylase, mitochondrial [Papio anubis])	GO:0042369(biological_process:vitamin D catabolic process); GO:0005654(cellular_component:nucleoplasm); GO:0004497(molecular_function:monooxygenase activity); GO:0006766(biological_process:vitamin metabolic process); GO:0042359(biological_process:vitamin D metabolic process); GO:0020037(molecular_function:heme binding); GO:0016705(molecular_function:oxidoreductase activity, acting on paired donor…	K07436	CYP24A1	map04928(Parathyroid hormone synthesis, secretion and action); map00100(Steroid biosynthesis); map05206(MicroRNAs in cancer)	COG2124(O:Posttranslational modification, protein turnover, chaperones)	COG2124(breast carcinoma amplified sequence 1)	PF00067.22(p450:Cytochrome P450)	sp|Q07973|CP24A_HUMAN(1,25-dihydroxyvitamin D(3) 24-hydroxylase, mitochondrial OS=Homo sapiens OX=9606 GN=CYP24A1 PE=1 SV=2)	1591
ENSG00000099194	SCD	stearoyl-CoA desaturase [Source:HGNC Symbol;Acc:HGNC:10571]	5245	3.52982	1.8196	0	0	yes	up	14242	12424	12423	41196	40384	40345	201.43	197.89	194.17	551.28	559.88	552.94	197.83	554.7	BAD92219.1(stearoyl-CoA desaturase variant, partial [Homo sapiens])	GO:0006633(biological_process:fatty acid biosynthetic process); GO:0006631(biological_process:fatty acid metabolic process); GO:0006636(biological_process:unsaturated fatty acid biosynthetic process); GO:0005789(cellular_component:endoplasmic reticulum membrane); GO:0030176(cellular_component:integral component of endoplasmic reticulum membrane); GO:1903966(biological_process:monounsaturated fatt…	K00507	SCD, desC	map04212(Longevity regulating pathway - worm); map03320(PPAR signaling pathway); map01040(Biosynthesis of unsaturated fatty acids); map04152(AMPK signaling pathway)	COG1398(I:Lipid transport and metabolism)	COG1398(desaturase)		sp|O00767|ACOD_HUMAN(Acyl-CoA desaturase OS=Homo sapiens OX=9606 GN=SCD PE=1 SV=2)	6319
ENSG00000166035	LIPC	lipase C, hepatic type [Source:HGNC Symbol;Acc:HGNC:6619]	2559	6.16815	2.62484	0	0	yes	up	536.17	437	453	2715	2529	2525	22.85	22.45	22.61	106.76	103.19	101.36	22.6367	103.77	NP_000227.2(hepatic triacylglycerol lipase precursor [Homo sapiens])	GO:0006633(biological_process:fatty acid biosynthetic process); GO:0034375(biological_process:high-density lipoprotein particle remodeling); GO:0034374(biological_process:low-density lipoprotein particle remodeling); GO:0034373(biological_process:intermediate-density lipoprotein particle remodeling); GO:0034372(biological_process:very-low-density lipoprotein particle remodeling); GO:0005788(cellu…	K01046	lip, TGL2	map00561(Glycerolipid metabolism)	ENOG4110MCZ(I:Lipid transport and metabolism)	ENOG4110MCZ(very-low-density lipoprotein particle remodeling)	PF00151.19(Lipase:Lipase); PF01477.23(PLAT:PLAT/LH2 domain)	sp|P11150|LIPC_HUMAN(Hepatic triacylglycerol lipase OS=Homo sapiens OX=9606 GN=LIPC PE=1 SV=3)	3990
ENSG00000211459	MT-RNR1	mitochondrially encoded 12S rRNA [Source:HGNC Symbol;Acc:HGNC:7470]	954	0.122673	-3.02711	0	0	yes	down	157015	134449	138675	16417.2	15683.3	14533.2	16677.7	16352.3	16314	1641.4	1619.53	1536.23	16448	1599.05
ENSG00000146678	IGFBP1	insulin like growth factor binding protein 1 [Source:HGNC Symbol;Acc:HGNC:5469]	1514	4.08187	2.02923	0	0	yes	up	10083	8902	8900	33149	32017	35426	579.17	580.36	565.55	1797.02	1795.67	1995.97	575.027	1862.89	XP_002818021.1(insulin-like growth factor-binding protein 1 [Pongo abelii])	GO:0090090(biological_process:negative regulation of canonical Wnt signaling pathway); GO:0005794(cellular_component:Golgi apparatus); GO:0008286(biological_process:insulin receptor signaling pathway); GO:0043567(biological_process:regulation of insulin-like growth factor receptor signaling pathway); GO:0031994(molecular_function:insulin-like growth factor I binding); GO:0031995(molecular_functio…				ENOG4111H9A(A:RNA processing and modification)	ENOG4111H9A(Insulin-like growth factor binding protein 1)	PF00086.18(Thyroglobulin_1:Thyroglobulin type-1 repeat); PF00219.18(IGFBP:Insulin-like growth factor binding protein)	sp|P08833|IBP1_HUMAN(Insulin-like growth factor-binding protein 1 OS=Homo sapiens OX=9606 GN=IGFBP1 PE=1 SV=1)	3484
ENSG00000182871	COL18A1	collagen type XVIII alpha 1 chain [Source:HGNC Symbol;Acc:HGNC:2195]	6586	3.54427	1.82549	0	0	yes	up	1988.25	1820.2	1741.72	5819.59	5522.16	6049.33	31.75	30.97	29.23	82.11	83.82	85.59	30.65	83.84	P39060.5(RecName: Full=Collagen alpha-1(XVIII) chain; Contains: RecName: Full=Endostatin; Contains: RecName: Full=Non-collagenous domain 1; Short=NC1; Flags: Precursor)	GO:0005201(molecular_function:extracellular matrix structural constituent); GO:0030335(biological_process:positive regulation of cell migration); GO:0005788(cellular_component:endoplasmic reticulum lumen); GO:0031012(cellular_component:extracellular matrix); GO:0001525(biological_process:angiogenesis); GO:0001886(biological_process:endothelial cell morphogenesis); GO:0070062(cellular_component:ex…	K06823	COL18A	map04974(Protein digestion and absorption)	ENOG410XQ04(S:Function unknown); ENOG410YKSW(S:Function unknown)	ENOG410XQ04(Collagen, type XV, alpha 1); ENOG410YKSW(Domain of Unknown Function (DUF959))	PF06482.11(Endostatin:Collagenase NC10 and Endostatin); PF01391.18(Collagen:Collagen triple helix repeat (20 copies)); PF06121.14(DUF959:Domain of Unknown Function (DUF959)); PF01392.22(Fz:Fz domain); PF13385.6(Laminin_G_3:Concanavalin A-like lectin/glucanases superfamily)	sp|P39060|COIA1_HUMAN(Collagen alpha-1(XVIII) chain OS=Homo sapiens OX=9606 GN=COL18A1 PE=1 SV=5)	80781
ENSG00000169174	PCSK9	proprotein convertase subtilisin/kexin type 9 [Source:HGNC Symbol;Acc:HGNC:20001]	3637	8.10242	3.01835	0	0	yes	up	736	688	704	5162	4850	5242	15.36	16.19	16.23	102.18	99.42	106.52	15.9267	102.707	XP_003815030.1(proprotein convertase subtilisin/kexin type 9 isoform X2 [Pan paniscus])	GO:0004252(molecular_function:serine-type endopeptidase activity); GO:0032805(biological_process:positive regulation of low-density lipoprotein particle receptor catabolic process); GO:0005770(cellular_component:late endosome); GO:1905601(biological_process:negative regulation of receptor-mediated endocytosis involved in cholesterol transport); GO:0032802(biological_process:low-density lipoprotei…	K13050	PCSK9	map04979(Cholesterol metabolism)	COG1404(U:Intracellular trafficking, secretion, and vesicular transport)	COG1404(Bartter syndrome, infantile, with sensorineural deafness (Barttin))	PF18459.1(PCSK9_C1:Proprotein convertase subtilisin-like/kexin type 9 C-terminal domain); PF18463.1(PCSK9_C3:Proprotein convertase subtilisin-like/kexin type 9 C-terminal domain); PF18464.1(PCSK9_C2:Proprotein convertase subtilisin-like/kexin type 9 C-terminal domain); PF00082.22(Peptidase_S8:Subtilase family); PF05922.16(Inhibitor_I9:Peptidase inhibitor I9)	sp|Q8NBP7|PCSK9_HUMAN(Proprotein convertase subtilisin/kexin type 9 OS=Homo sapiens OX=9606 GN=PCSK9 PE=1 SV=3)	255738
ENSG00000198712	MT-CO2	mitochondrially encoded cytochrome c oxidase II [Source:HGNC Symbol;Acc:HGNC:7421]	684	3.24194	1.69686	0	0	yes	up	46492.1	41123.4	41870.5	128729	123220	119286	8363.04	8585.11	8356.69	21707.9	21409.2	21821.7	8434.95	21646.3	AFV53822.1(cytochrome c oxidase subunit II (mitochondrion) [Homo sapiens])	GO:0004129(molecular_function:cytochrome-c oxidase activity); GO:0022900(biological_process:electron transport chain); GO:0046872(molecular_function:metal ion binding); GO:0045277(cellular_component:respiratory chain complex IV); GO:0007595(biological_process:lactation); GO:0016021(cellular_component:integral component of membrane); GO:0016020(cellular_component:membrane); GO:0006123(biological_p…	K02261	COX2	map04932(Non-alcoholic fatty liver disease (NAFLD)); map04260(Cardiac muscle contraction); map05012(Parkinson disease); map05010(Alzheimer disease); map05016(Huntington disease); map04714(Thermogenesis); map00190(Oxidative phosphorylation)	COG1622(C:Energy production and conversion)	COG1622(Subunits I and II form the functional core of the enzyme complex. Electrons originating in cytochrome c are transferred via heme a and Cu(A) to the binuclear center formed by heme a3 and Cu(B) (By similarity))	PF00116.20(COX2:Cytochrome C oxidase subunit II, periplasmic domain); PF02790.15(COX2_TM:Cytochrome C oxidase subunit II, transmembrane domain)	sp|P00403|COX2_HUMAN(Cytochrome c oxidase subunit 2 OS=Homo sapiens OX=9606 GN=MT-CO2 PE=1 SV=1)	4513
ENSG00000021826	CPS1	carbamoyl-phosphate synthase 1 [Source:HGNC Symbol;Acc:HGNC:2323]	5698	2.98208	1.57632	0	0	yes	up	35335.1	31151	32147	88271	86661.4	85159	538.54	538.07	535.45	1260.89	1282.43	1244.54	537.353	1262.62	BAD92037.1(carbamoyl-phosphate synthetase 1 variant, partial [Homo sapiens])	GO:0004175(molecular_function:endopeptidase activity); GO:0007494(biological_process:midgut development); GO:0009636(biological_process:response to toxic substance); GO:0006526(biological_process:arginine biosynthetic process); GO:1903718(biological_process:cellular response to ammonia); GO:0006807(biological_process:nitrogen compound metabolic process); GO:0044877(molecular_function:macromolecul…	K01948	CPS1	map00220(Arginine biosynthesis); map00250(Alanine, aspartate and glutamate metabolism); map00910(Nitrogen metabolism)	COG0458(F:Nucleotide transport and metabolism)	COG0458(carbamoyl-phosphate synthetase ammonia chain)	PF02786.17(CPSase_L_D2:Carbamoyl-phosphate synthase L chain, ATP binding domain); PF00988.22(CPSase_sm_chain:Carbamoyl-phosphate synthase small chain, CPSase domain); PF00117.28(GATase:Glutamine amidotransferase class-I); PF02787.19(CPSase_L_D3:Carbamoyl-phosphate synthetase large chain, oligomerisation domain); PF02222.22(ATP-grasp:ATP-grasp domain); PF02142.22(MGS:MGS-like domain); PF07478.13(D…	sp|P31327|CPSM_HUMAN(Carbamoyl-phosphate synthase [ammonia], mitochondrial OS=Homo sapiens OX=9606 GN=CPS1 PE=1 SV=2)	1373
ENSG00000198727	MT-CYB	mitochondrially encoded cytochrome b [Source:HGNC Symbol;Acc:HGNC:7427]	1141	4.52069	2.17654	0	0	yes	up	10507.8	9105.96	9279.6	40119.9	37933.3	37398.7	869.45	859.08	849.93	3128.82	3057.84	3058.51	859.487	3081.72	YP_003024038.1(cytochrome b (mitochondrion) [Homo sapiens])	GO:0033590(biological_process:response to cobalamin); GO:0008121(molecular_function:ubiquinol-cytochrome-c reductase activity); GO:0031305(cellular_component:integral component of mitochondrial inner membrane); GO:0044877(molecular_function:macromolecular complex binding); GO:0001666(biological_process:response to hypoxia); GO:0045153(molecular_function:electron transporter, transferring electron…	K00412	CYTB, petB	map04932(Non-alcoholic fatty liver disease (NAFLD)); map04260(Cardiac muscle contraction); map05012(Parkinson disease); map05010(Alzheimer disease); map05016(Huntington disease); map04714(Thermogenesis); map00190(Oxidative phosphorylation)	COG1290(C:Energy production and conversion)	COG1290(Component of the ubiquinol-cytochrome c reductase complex (complex III or cytochrome b-c1 complex), which is a respiratory chain that generates an electrochemical potential coupled to ATP synthesis (By similarity))	PF00033.19(Cytochrome_B:Cytochrome b/b6/petB); PF13631.6(Cytochrom_B_N_2:Cytochrome b(N-terminal)/b6/petB); PF00032.17(Cytochrom_B_C:Cytochrome b(C-terminal)/b6/petD)	sp|P00156|CYB_HUMAN(Cytochrome b OS=Homo sapiens OX=9606 GN=MT-CYB PE=1 SV=2)	4519
ENSG00000146674	IGFBP3	insulin like growth factor binding protein 3 [Source:HGNC Symbol;Acc:HGNC:5472]	2631	3.89906	1.96313	8.36256e-304	4.43913e-301	yes	up	1066	991	944	3415	3382	3549	37.11	39.98	36.22	112.52	116.92	121.29	37.77	116.91	NP_001013416.1(insulin-like growth factor-binding protein 3 isoform a precursor [Homo sapiens])	GO:0014912(biological_process:negative regulation of smooth muscle cell migration); GO:0005788(cellular_component:endoplasmic reticulum lumen); GO:0010906(biological_process:regulation of glucose metabolic process); GO:0008160(molecular_function:protein tyrosine phosphatase activator activity); GO:0042981(biological_process:regulation of apoptotic process); GO:0001649(biological_process:osteoblas…	K10138	IGFBP3	map04218(Cellular senescence); map04115(p53 signaling pathway); map05202(Transcriptional misregulation in cancer)	ENOG4111MF3(A:RNA processing and modification)	ENOG4111MF3(Insulin-like growth factor binding protein 3)	PF00086.18(Thyroglobulin_1:Thyroglobulin type-1 repeat); PF00219.18(IGFBP:Insulin-like growth factor binding protein)	sp|P17936|IBP3_HUMAN(Insulin-like growth factor-binding protein 3 OS=Homo sapiens OX=9606 GN=IGFBP3 PE=1 SV=2)	3486
ENSG00000181222	POLR2A	RNA polymerase II subunit A [Source:HGNC Symbol;Acc:HGNC:9187]	6749	0.402301	-1.31365	5.10421e-303	2.64647e-300	yes	down	8911	7983	8175	3062	2969	2890	113.03	121.59	123.57	40.99	36.32	35.99	119.397	37.7667	XP_004266962.1(PREDICTED: DNA-directed RNA polymerase II subunit RPB1 [Orcinus orca])	GO:0008022(molecular_function:protein C-terminus binding); GO:0003677(molecular_function:DNA binding); GO:0050434(biological_process:positive regulation of viral transcription); GO:0008543(biological_process:fibroblast growth factor receptor signaling pathway); GO:0014070(biological_process:response to organic cyclic compound); GO:0005737(cellular_component:cytoplasm); GO:0005719(cellular_compone…	K03006	RPB1, POLR2A	map00240(Pyrimidine metabolism); map03020(RNA polymerase); map05016(Huntington disease); map00230(Purine metabolism); map05168(Herpes simplex infection)	COG0086(S:Function unknown)	COG0086(solute carrier family 35 member)	PF04997.12(RNA_pol_Rpb1_1:RNA polymerase Rpb1, domain 1); PF04998.17(RNA_pol_Rpb1_5:RNA polymerase Rpb1, domain 5); PF00623.20(RNA_pol_Rpb1_2:RNA polymerase Rpb1, domain 2); PF04992.14(RNA_pol_Rpb1_6:RNA polymerase Rpb1, domain 6); PF04990.12(RNA_pol_Rpb1_7:RNA polymerase Rpb1, domain 7); PF04983.18(RNA_pol_Rpb1_3:RNA polymerase Rpb1, domain 3); PF05000.17(RNA_pol_Rpb1_4:RNA polymerase Rpb1, doma…	sp|P11414|RPB1_CRIGR(DNA-directed RNA polymerase II subunit RPB1 OS=Cricetulus griseus OX=10029 GN=POLR2A PE=2 SV=2)	5430
ENSG00000138759	FRAS1	Fraser extracellular matrix complex subunit 1 [Source:HGNC Symbol;Acc:HGNC:19185]	15871	2.99894	1.58445	1.00082e-302	5.07122e-300	yes	up	1984	1690	1789	4920	4689	4870	9.87	9.92	10.63	24.25	23.99	25.08	10.14	24.44	NP_079350.5(extracellular matrix protein FRAS1 isoform 1 precursor [Homo sapiens])	GO:0002009(biological_process:morphogenesis of an epithelium); GO:0005201(molecular_function:extracellular matrix structural constituent); GO:0005604(cellular_component:basement membrane); GO:0030326(biological_process:embryonic limb morphogenesis); GO:0003338(biological_process:metanephros morphogenesis); GO:0016021(cellular_component:integral component of membrane); GO:0016020(cellular_componen…				ENOG410XQ7P(U:Intracellular trafficking, secretion, and vesicular transport)	ENOG410XQ7P(Fraser syndrome 1)	PF16184.5(Cadherin_3:Cadherin-like); PF03160.14(Calx-beta:Calx-beta domain); PF00093.18(VWC:von Willebrand factor type C domain); PF17963.1(Big_9:Bacterial Ig domain); PF17803.1(Cadherin_4:Bacterial cadherin-like domain); PF14843.6(GF_recep_IV:Growth factor receptor domain IV); PF00757.20(Furin-like:Furin-like cysteine rich region); PF15913.5(Furin-like_2:Furin-like repeat, cysteine-rich)	sp|Q86XX4|FRAS1_HUMAN(Extracellular matrix protein FRAS1 OS=Homo sapiens OX=9606 GN=FRAS1 PE=1 SV=2)	80144
ENSG00000039068	CDH1	cadherin 1 [Source:HGNC Symbol;Acc:HGNC:1748]	4878	3.65512	1.86992	1.8313e-298	9.07307e-296	yes	up	1408.88	1114	1238	4030	3975	4131	24.19	23.67	21.89	67.81	62.86	63.03	23.25	64.5667	BAA88957.1(E-cadherin [Homo sapiens])	GO:0007416(biological_process:synapse assembly); GO:0035635(biological_process:entry of bacterium into host cell); GO:0015629(cellular_component:actin cytoskeleton); GO:0005794(cellular_component:Golgi apparatus); GO:0034332(biological_process:adherens junction organization); GO:0016339(biological_process:calcium-dependent cell-cell adhesion via plasma membrane cell adhesion molecules); GO:003279…	K05689	CDH1, CDHE, CD324	map04514(Cell adhesion molecules (CAMs)); map05216(Thyroid cancer); map04390(Hippo signaling pathway); map05213(Endometrial cancer); map04015(Rap1 signaling pathway); map05200(Pathways in cancer); map05218(Melanoma); map05219(Bladder cancer); map05130(Pathogenic Escherichia coli infection); map05226(Gastric cancer); map05100(Bacterial invasion of epithelial cells); map04520(Adherens junction)	ENOG410XQHI(U:Intracellular trafficking, secretion, and vesicular transport)	ENOG410XQHI(Cadherins are calcium dependent cell adhesion proteins (By similarity))	PF00028.17(Cadherin:Cadherin domain); PF01049.17(Cadherin_C:Cadherin cytoplasmic region); PF08758.11(Cadherin_pro:Cadherin prodomain like); PF17756.1(RET_CLD1:RET Cadherin like domain 1)	sp|P12830|CADH1_HUMAN(Cadherin-1 OS=Homo sapiens OX=9606 GN=CDH1 PE=1 SV=3)	999
ENSG00000142798	HSPG2	heparan sulfate proteoglycan 2 [Source:HGNC Symbol;Acc:HGNC:5273]	14341	2.76078	1.46508	2.2098e-298	1.07103e-295	yes	up	4989.58	4539.19	4712.72	11573.6	10985.9	12231	39.65	40.75	38.38	81.8	81.32	88.23	39.5933	83.7833	NP_005520.4(basement membrane-specific heparan sulfate proteoglycan core protein isoform b precursor [Homo sapiens])	GO:0008022(molecular_function:protein C-terminus binding); GO:0034446(biological_process:substrate adhesion-dependent cell spreading); GO:0030154(biological_process:cell differentiation); GO:0046872(molecular_function:metal ion binding); GO:0072358(biological_process:cardiovascular system development); GO:0001525(biological_process:angiogenesis); GO:0001523(biological_process:retinoid metabolic p…	K06255	HSPG2	map05205(Proteoglycans in cancer); map04512(ECM-receptor interaction); map05161(Hepatitis B)	ENOG410XTD2(S:Function unknown)	ENOG410XTD2(heparan sulfate proteoglycan)	PF07679.16(I-set:Immunoglobulin I-set domain); PF13927.6(Ig_3:Immunoglobulin domain); PF13895.6(Ig_2:Immunoglobulin domain); PF00047.25(ig:Immunoglobulin domain); PF00052.18(Laminin_B:Laminin B (Domain IV)); PF07686.17(V-set:Immunoglobulin V-set domain); PF00054.23(Laminin_G_1:Laminin G domain); PF02210.24(Laminin_G_2:Laminin G domain); PF00053.24(Laminin_EGF:Laminin EGF domain); PF18452.1(Ig_6:I…	sp|P98160|PGBM_HUMAN(Basement membrane-specific heparan sulfate proteoglycan core protein OS=Homo sapiens OX=9606 GN=HSPG2 PE=1 SV=4)	3339
ENSG00000080824	HSP90AA1	heat shock protein 90 alpha family class A member 1 [Source:HGNC Symbol;Acc:HGNC:5253]	3510	0.540425	-0.887834	1.33631e-296	6.33895e-294	no	down	28018.9	24520.7	23809.9	12263	12146	12040.1	647.83	637.51	610.07	268.74	280.34	272.14	631.803	273.74	NP_001017963.2(heat shock protein HSP 90-alpha isoform 1 [Homo sapiens])	GO:0048675(biological_process:axon extension); GO:0006457(biological_process:protein folding); GO:0016887(molecular_function:ATPase activity); GO:0000086(biological_process:G2/M transition of mitotic cell cycle); GO:0034605(biological_process:cellular response to heat); GO:0034774(cellular_component:secretory granule lumen); GO:0051186(biological_process:cofactor metabolic process); GO:1903827(bi…	K04079	HSP90A, htpG	map05215(Prostate cancer); map04657(IL-17 signaling pathway); map05200(Pathways in cancer); map04217(Necroptosis); map04659(Th17 cell differentiation); map04151(PI3K-Akt signaling pathway); map04612(Antigen processing and presentation); map04621(NOD-like receptor signaling pathway); map05418(Fluid shear stress and atherosclerosis); map04914(Progesterone-mediated oocyte maturation); map04915(Estro…	COG0326(O:Posttranslational modification, protein turnover, chaperones)	COG0326(Molecular chaperone. Has ATPase activity (By similarity))	PF00183.18(HSP90:Hsp90 protein); PF02518.26(HATPase_c:Histidine kinase-, DNA gyrase B-, and HSP90-like ATPase); PF13589.6(HATPase_c_3:Histidine kinase-, DNA gyrase B-, and HSP90-like ATPase)	sp|P07900|HS90A_HUMAN(Heat shock protein HSP 90-alpha OS=Homo sapiens OX=9606 GN=HSP90AA1 PE=1 SV=5)	3320
ENSG00000183098	GPC6	glypican 6 [Source:HGNC Symbol;Acc:HGNC:4454]	7121	5.58745	2.48219	2.93565e-296	1.36355e-293	yes	up	475.25	415.65	439.51	2166.54	2199.9	2206.84	9.2	8.93	10.74	25.22	24.6	24	9.62333	24.6067	NP_005699.1(glypican-6 precursor [Homo sapiens])	GO:1905606(biological_process:regulation of presynapse assembly); GO:1905475(biological_process:regulation of protein localization to membrane); GO:0046658(cellular_component:anchored component of plasma membrane); GO:0099560(biological_process:synaptic membrane adhesion); GO:0045202(cellular_component:synapse); GO:0098696(biological_process:regulation of neurotransmitter receptor localization to…	K08112	GPC6		ENOG410XST2(O:Posttranslational modification, protein turnover, chaperones)	ENOG410XST2(Cell surface proteoglycan that bears heparan sulfate (By similarity))	PF01153.19(Glypican:Glypican)	sp|Q9Y625|GPC6_HUMAN(Glypican-6 OS=Homo sapiens OX=9606 GN=GPC6 PE=1 SV=1)	10082
ENSG00000197157	SND1	staphylococcal nuclease and tudor domain containing 1 [Source:HGNC Symbol;Acc:HGNC:30646]	3448	2.83865	1.5052	1.85999e-289	8.46296e-287	yes	up	2331	2142	2190	5682	5389	5664.05	52.72	53.64	55.02	122.94	120.51	123.77	53.7933	122.407	BAD92747.1(EBNA-2 co-activator variant, partial [Homo sapiens])	GO:0004521(molecular_function:endoribonuclease activity); GO:1905172(molecular_function:RISC complex binding); GO:0090305(biological_process:nucleic acid phosphodiester bond hydrolysis); GO:0003676(molecular_function:nucleic acid binding); GO:0001649(biological_process:osteoblast differentiation); GO:0005737(cellular_component:cytoplasm); GO:0070062(cellular_component:extracellular exosome); GO:0…	K15979	SND1	map05203(Viral carcinogenesis)	COG1525(L:Replication, recombination and repair)	COG1525(nuclease)	PF00565.17(SNase:Staphylococcal nuclease homologue); PF00567.24(TUDOR:Tudor domain)	sp|Q7KZF4|SND1_HUMAN(Staphylococcal nuclease domain-containing protein 1 OS=Homo sapiens OX=9606 GN=SND1 PE=1 SV=1)	27044
ENSG00000165092	ALDH1A1	aldehyde dehydrogenase 1 family member A1 [Source:HGNC Symbol;Acc:HGNC:402]	2096	1.6922	0.758903	1.56085e-288	6.95982e-286	no	up	22828	19909	19986	31778	31373	30645	887.8	875.94	860.12	1170.59	1195.81	1167.85	874.62	1178.08	XP_016815803.1(retinal dehydrogenase 1 isoform X1 [Pan troglodytes])	GO:0005737(cellular_component:cytoplasm); GO:0043547(biological_process:positive regulation of GTPase activity); GO:0004029(molecular_function:aldehyde dehydrogenase (NAD) activity); GO:0120163(biological_process:negative regulation of cold-induced thermogenesis); GO:0051287(molecular_function:NAD binding); GO:0005829(cellular_component:cytosol); GO:0018479(molecular_function:benzaldehyde dehydro…	K07249	ALDH1A	map00830(Retinol metabolism)	COG1012(U:Intracellular trafficking, secretion, and vesicular transport)	COG1012(Transmembrane channel-like)	PF00171.22(Aldedh:Aldehyde dehydrogenase family); PF05893.14(LuxC:Acyl-CoA reductase (LuxC))	sp|P00352|AL1A1_HUMAN(Retinal dehydrogenase 1 OS=Homo sapiens OX=9606 GN=ALDH1A1 PE=1 SV=2)	216
ENSG00000149485	FADS1	fatty acid desaturase 1 [Source:HGNC Symbol;Acc:HGNC:3574]	4364	2.33334	1.22239	3.56465e-286	1.55831e-283	yes	up	4745.99	4327.02	4043.97	9008.98	9020.89	9021.36	87.61	94.29	86.29	162.93	166.15	165.34	89.3967	164.807	NP_037534.5(acyl-CoA (8-3)-desaturase [Homo sapiens])	GO:0043651(biological_process:linoleic acid metabolic process); GO:0006636(biological_process:unsaturated fatty acid biosynthetic process); GO:0000248(molecular_function:C-5 sterol desaturase activity); GO:0005789(cellular_component:endoplasmic reticulum membrane); GO:0032868(biological_process:response to insulin); GO:0062076(molecular_function:acyl-CoA delta5-desaturase activity); GO:0014070(bi…	K10224	FADS1	map01040(Biosynthesis of unsaturated fatty acids)	ENOG410XVSZ(I:Lipid transport and metabolism)	ENOG410XVSZ(Fatty acid desaturase)	PF00487.24(FA_desaturase:Fatty acid desaturase); PF00173.28(Cyt-b5:Cytochrome b5-like Heme/Steroid binding domain)	sp|O60427|FADS1_HUMAN(Acyl-CoA (8-3)-desaturase OS=Homo sapiens OX=9606 GN=FADS1 PE=1 SV=3)	3992
ENSG00000125257	ABCC4	ATP binding cassette subfamily C member 4 [Source:HGNC Symbol;Acc:HGNC:55]	5855	3.56866	1.83538	1.68926e-277	7.24271e-275	yes	up	1246	1004.22	1074	3550	3544	3380	16.05	14.95	15.6	45.2	45.98	42.52	15.5333	44.5667	NP_005836.2(multidrug resistance-associated protein 4 isoform 1 [Homo sapiens])	GO:0098591(cellular_component:external side of apical plasma membrane); GO:0016020(cellular_component:membrane); GO:0016887(molecular_function:ATPase activity); GO:0014070(biological_process:response to organic cyclic compound); GO:0042626(molecular_function:ATPase activity, coupled to transmembrane movement of substances); GO:0002576(biological_process:platelet degranulation); GO:0032310(biologi…	K05673	ABCC4	map04024(cAMP signaling pathway); map01523(Antifolate resistance); map02010(ABC transporters); map04976(Bile secretion)	COG1132(J:Translation, ribosomal structure and biogenesis)	COG1132((ribosomal) protein)	PF00664.23(ABC_membrane:ABC transporter transmembrane region); PF00005.27(ABC_tran:ABC transporter); PF02463.19(SMC_N:RecF/RecN/SMC N terminal domain); PF01926.23(MMR_HSR1:50S ribosome-binding GTPase); PF13191.6(AAA_16:AAA ATPase domain)	sp|O15439|MRP4_HUMAN(Multidrug resistance-associated protein 4 OS=Homo sapiens OX=9606 GN=ABCC4 PE=1 SV=3)	10257
ENSG00000109814	UGDH	UDP-glucose 6-dehydrogenase [Source:HGNC Symbol;Acc:HGNC:12525]	3037	2.40218	1.26434	1.34975e-274	5.67788e-272	yes	up	3917	3462.16	3334.89	7691	7734	7316.39	115.7	114.78	109.97	208.31	218.31	206.46	113.483	211.027	XP_026958933.1(UDP-glucose 6-dehydrogenase isoform X1 [Lagenorhynchus obliquidens])	GO:0001702(biological_process:gastrulation with mouth forming second); GO:0030206(biological_process:chondroitin sulfate biosynthetic process); GO:0005975(biological_process:carbohydrate metabolic process); GO:0070062(cellular_component:extracellular exosome); GO:0016616(molecular_function:oxidoreductase activity, acting on the CH-OH group of donors, NAD or NADP as acceptor); GO:0003824(molecular…	K00012	UGDH, ugd	map00520(Amino sugar and nucleotide sugar metabolism); map00040(Pentose and glucuronate interconversions); map00053(Ascorbate and aldarate metabolism)	COG1004(M:Cell wall/membrane/envelope biogenesis)	COG1004(UDP-glucose 6-dehydrogenase)	PF03721.14(UDPG_MGDP_dh_N:UDP-glucose/GDP-mannose dehydrogenase family, NAD binding domain); PF03720.15(UDPG_MGDP_dh_C:UDP-glucose/GDP-mannose dehydrogenase family, UDP binding domain); PF00984.19(UDPG_MGDP_dh:UDP-glucose/GDP-mannose dehydrogenase family, central domain)	sp|O60701|UGDH_HUMAN(UDP-glucose 6-dehydrogenase OS=Homo sapiens OX=9606 GN=UGDH PE=1 SV=1)	7358
ENSG00000196498	NCOR2	nuclear receptor corepressor 2 [Source:HGNC Symbol;Acc:HGNC:7673]	8533	3.6037	1.84948	1.09504e-265	4.52109e-263	yes	up	1238	1122	1190	3815	3584	3920	19.9	17.11	22.28	53.46	51.21	59.12	19.7633	54.5967	NP_006303.4(nuclear receptor corepressor 2 isoform 1 [Homo sapiens])	GO:0003714(molecular_function:transcription corepressor activity); GO:0007595(biological_process:lactation); GO:0001012(molecular_function:RNA polymerase II regulatory region DNA binding); GO:0044877(molecular_function:macromolecular complex binding); GO:0003677(molecular_function:DNA binding); GO:0043565(molecular_function:sequence-specific DNA binding); GO:0032355(biological_process:response to…	K06065	NCOR2, SMRT	map04330(Notch signaling pathway); map05169(Epstein-Barr virus infection)	ENOG410YDXP(K:Transcription)	ENOG410YDXP(nuclear receptor co-repressor)	PF15784.5(GPS2_interact:G-protein pathway suppressor 2-interacting domain); PF00249.31(Myb_DNA-binding:Myb-like DNA-binding domain)	sp|Q9Y618|NCOR2_HUMAN(Nuclear receptor corepressor 2 OS=Homo sapiens OX=9606 GN=NCOR2 PE=1 SV=3)	9612
ENSG00000198431	TXNRD1	thioredoxin reductase 1 [Source:HGNC Symbol;Acc:HGNC:12437]	3860	1.78345	0.83467	1.89647e-264	7.68762e-262	no	up	11500	10135	10154	17036	16654	16423	264.6	265.4	264.01	362.19	375.58	376.42	264.67	371.397	NP_001087240.1(thioredoxin reductase 1, cytoplasmic isoform 5 [Homo sapiens])	GO:0016491(molecular_function:oxidoreductase activity); GO:0007165(biological_process:signal transduction); GO:0001887(biological_process:selenium compound metabolic process); GO:0034599(biological_process:cellular response to oxidative stress); GO:0004791(molecular_function:thioredoxin-disulfide reductase activity); GO:0005737(cellular_component:cytoplasm); GO:0098869(biological_process:cellular…	K00384	trxB, TRR	map00450(Selenocompound metabolism)	COG1249(C:Energy production and conversion)	COG1249(dihydrolipoyl dehydrogenase)	PF07992.14(Pyr_redox_2:Pyridine nucleotide-disulphide oxidoreductase); PF02852.22(Pyr_redox_dim:Pyridine nucleotide-disulphide oxidoreductase, dimerisation domain); PF00070.27(Pyr_redox:Pyridine nucleotide-disulphide oxidoreductase); PF13738.6(Pyr_redox_3:Pyridine nucleotide-disulphide oxidoreductase); PF00890.24(FAD_binding_2:FAD binding domain); PF00462.24(Glutaredoxin:Glutaredoxin); PF12831.7(…	sp|Q16881|TRXR1_HUMAN(Thioredoxin reductase 1, cytoplasmic OS=Homo sapiens OX=9606 GN=TXNRD1 PE=1 SV=3)	7296
ENSG00000142192	APP	amyloid beta precursor protein [Source:HGNC Symbol;Acc:HGNC:620]	3583	1.80751	0.854002	2.04923e-259	8.15849e-257	no	up	15034	13267	13879	22797	22211	22418	331.88	329.8	336.37	472.5	483.89	480.79	332.683	479.06	NP_000475.1(amyloid-beta precursor protein isoform a precursor [Homo sapiens])	GO:1905606(biological_process:regulation of presynapse assembly); GO:1990535(biological_process:neuron projection maintenance); GO:0007409(biological_process:axonogenesis); GO:0007617(biological_process:mating behavior); GO:0007612(biological_process:learning); GO:0016358(biological_process:dendrite development); GO:0005788(cellular_component:endoplasmic reticulum lumen); GO:0030424(cellular_comp…	K04520	APP	map04726(Serotonergic synapse); map05010(Alzheimer disease)	ENOG410ZW2A(U:Intracellular trafficking, secretion, and vesicular transport); ENOG410ZTKC(Z:Cytoskeleton)	ENOG410ZW2A(Amyloid beta (A4)); ENOG410ZTKC(amyloid beta (A4) precursor protein)	PF12925.7(APP_E2:E2 domain of amyloid precursor protein); PF02177.16(APP_N:Amyloid A4 N-terminal heparin-binding); PF10515.9(APP_amyloid:Beta-amyloid precursor protein C-terminus); PF12924.7(APP_Cu_bd:Copper-binding of amyloid precursor, CuBD); PF03494.13(Beta-APP:Beta-amyloid peptide (beta-APP)); PF00014.23(Kunitz_BPTI:Kunitz/Bovine pancreatic trypsin inhibitor domain)	sp|P05067|A4_HUMAN(Amyloid-beta precursor protein OS=Homo sapiens OX=9606 GN=APP PE=1 SV=3)	351
ENSG00000115919	KYNU	kynureninase [Source:HGNC Symbol;Acc:HGNC:6469]	1576	2.95494	1.56313	5.28817e-255	2.06842e-252	yes	up	2036.84	1774.05	1639.99	4760.33	4849.36	4613.46	108.89	107.56	92.48	245.64	250.26	243.66	102.977	246.52	XP_016805243.1(kynureninase isoform X1 [Pan troglodytes])	GO:0030429(molecular_function:kynureninase activity); GO:0034354(biological_process:'de novo' NAD biosynthetic process from tryptophan); GO:0009435(biological_process:NAD biosynthetic process); GO:0006569(biological_process:tryptophan catabolic process); GO:0043420(biological_process:anthranilate metabolic process); GO:0005737(cellular_component:cytoplasm); GO:0019441(biological_process:tryptopha…	K01556	KYNU, kynU	map00380(Tryptophan metabolism)	COG3844(E:Amino acid transport and metabolism)	COG3844(Catalyzes the cleavage of L-kynurenine (L-Kyn) and L-3- hydroxykynurenine (L-3OHKyn) into anthranilic acid (AA) and 3- hydroxyanthranilic acid (3-OHAA), respectively (By similarity))	PF00266.19(Aminotran_5:Aminotransferase class-V)	sp|Q16719|KYNU_HUMAN(Kynureninase OS=Homo sapiens OX=9606 GN=KYNU PE=1 SV=1)	8942
ENSG00000176153	GPX2	glutathione peroxidase 2 [Source:HGNC Symbol;Acc:HGNC:4554]	922	4.08837	2.03153	9.32588e-255	3.58484e-252	yes	up	800	745	710	2882	2626	2647	88.56	96.29	87.63	308.5	289.22	298.94	90.8267	298.887	CAA48394.1(glutathione peroxidase-GI [Homo sapiens])	GO:0005737(cellular_component:cytoplasm); GO:0005829(cellular_component:cytosol); GO:0006979(biological_process:response to oxidative stress); GO:0098869(biological_process:cellular oxidant detoxification); GO:0022900(biological_process:electron transport chain); GO:0055114(biological_process:oxidation-reduction process); GO:0034599(biological_process:cellular response to oxidative stress); GO:00…	K00432	gpx	map00590(Arachidonic acid metabolism); map04918(Thyroid hormone synthesis); map00480(Glutathione metabolism)	COG0386(O:Posttranslational modification, protein turnover, chaperones)	COG0386(glutathione peroxidase)	PF00255.19(GSHPx:Glutathione peroxidase)	sp|P18283|GPX2_HUMAN(Glutathione peroxidase 2 OS=Homo sapiens OX=9606 GN=GPX2 PE=1 SV=3)	2877
ENSG00000130702	LAMA5	laminin subunit alpha 5 [Source:HGNC Symbol;Acc:HGNC:6485]	11426	2.67111	1.41744	1.94649e-249	7.35542e-247	yes	up	5620.02	5115	5228.01	12517	11741	13465	103.08	100.59	106.71	187.87	172.13	209.33	103.46	189.777	NP_005551.3(laminin subunit alpha-5 precursor [Homo sapiens])	GO:0042127(biological_process:regulation of cell proliferation); GO:0016331(biological_process:morphogenesis of embryonic epithelium); GO:0030324(biological_process:lung development); GO:0019221(biological_process:cytokine-mediated signaling pathway); GO:0034446(biological_process:substrate adhesion-dependent cell spreading); GO:0030155(biological_process:regulation of cell adhesion); GO:0030154(…	K06240	LAMA3_5	map05165(Human papillomavirus infection); map04510(Focal adhesion); map04512(ECM-receptor interaction); map05146(Amoebiasis); map05200(Pathways in cancer); map05145(Toxoplasmosis); map04151(PI3K-Akt signaling pathway); map05222(Small cell lung cancer)	ENOG410XRDC(S:Function unknown); ENOG410YNSE(S:Function unknown)	ENOG410XRDC(Laminin, alpha); ENOG410YNSE(Component of the spindle pole body (SPB) required for the proper execution of spindle pole body (SPB) duplication. Potential role in cross-linking filaments or anchoring other molecules. It is essential for growth (By similarity))	PF00053.24(Laminin_EGF:Laminin EGF domain); PF06008.14(Laminin_I:Laminin Domain I); PF00055.17(Laminin_N:Laminin N-terminal (Domain VI)); PF02210.24(Laminin_G_2:Laminin G domain); PF00054.23(Laminin_G_1:Laminin G domain); PF06009.12(Laminin_II:Laminin Domain II); PF00052.18(Laminin_B:Laminin B (Domain IV)); PF13385.6(Laminin_G_3:Concanavalin A-like lectin/glucanases superfamily)	sp|O15230|LAMA5_HUMAN(Laminin subunit alpha-5 OS=Homo sapiens OX=9606 GN=LAMA5 PE=1 SV=8)	3911
ENSG00000172893	DHCR7	7-dehydrocholesterol reductase [Source:HGNC Symbol;Acc:HGNC:2860]	2601	2.9822	1.57638	1.62794e-247	6.04916e-245	yes	up	1893	1811	1823	4962	4655	4977	59.54	63.99	61.56	143.52	141.75	150.49	61.6967	145.253	CAH90403.1(hypothetical protein [Pongo abelii])	GO:0042127(biological_process:regulation of cell proliferation); GO:0033490(biological_process:cholesterol biosynthetic process via lathosterol); GO:0030324(biological_process:lung development); GO:0005783(cellular_component:endoplasmic reticulum); GO:0016132(biological_process:brassinosteroid biosynthetic process); GO:0030154(biological_process:cell differentiation); GO:0005789(cellular_componen…	K00213	DHCR7	map00100(Steroid biosynthesis)	ENOG410XP67(I:Lipid transport and metabolism)	ENOG410XP67()-reductase)	PF01222.17(ERG4_ERG24:Ergosterol biosynthesis ERG4/ERG24 family)	sp|Q9UBM7|DHCR7_HUMAN(7-dehydrocholesterol reductase OS=Homo sapiens OX=9606 GN=DHCR7 PE=1 SV=1)	1717
ENSG00000130513	GDF15	growth differentiation factor 15 [Source:HGNC Symbol;Acc:HGNC:30142]	1200	2.21206	1.14539	5.64958e-243	2.06488e-240	yes	up	11409	10650	10469	21336	20112	22229	889.73	945.95	902.44	1564.18	1525.7	1706.95	912.707	1598.94	NP_004855.2(growth/differentiation factor 15 preproprotein [Homo sapiens])	GO:0000187(biological_process:activation of MAPK activity); GO:0005125(molecular_function:cytokine activity); GO:0005160(molecular_function:transforming growth factor beta receptor binding); GO:0048468(biological_process:cell development); GO:0030509(biological_process:BMP signaling pathway); GO:0007165(biological_process:signal transduction); GO:0010862(biological_process:positive regulation of …	K05504	GDF15	map04060(Cytokine-cytokine receptor interaction)	ENOG410XT8Z(O:Posttranslational modification, protein turnover, chaperones)	ENOG410XT8Z(bone morphogenetic protein)	PF00019.20(TGF_beta:Transforming growth factor beta like domain)	sp|Q99988|GDF15_HUMAN(Growth/differentiation factor 15 OS=Homo sapiens OX=9606 GN=GDF15 PE=1 SV=3)	9518
ENSG00000162231	NXF1	nuclear RNA export factor 1 [Source:HGNC Symbol;Acc:HGNC:8071]	2290	0.277677	-1.84852	4.20593e-242	1.51244e-239	yes	down	3414	2971	3090	804	753	769	107.88	109.95	111.77	26.98	24.02	24.85	109.867	25.2833	NP_006353.2(nuclear RNA export factor 1 isoform 1 [Homo sapiens])	GO:0005737(cellular_component:cytoplasm); GO:0016607(cellular_component:nuclear speck); GO:0016973(biological_process:poly(A)+ mRNA export from nucleus); GO:0003676(molecular_function:nucleic acid binding); GO:0005515(molecular_function:protein binding); GO:0005643(cellular_component:nuclear pore); GO:0005829(cellular_component:cytosol); GO:0005635(cellular_component:nuclear envelope); GO:0005654…	K14284	NXF, TAP, MEX67	map05164(Influenza A); map03008(Ribosome biogenesis in eukaryotes); map03015(mRNA surveillance pathway); map03013(RNA transport); map05168(Herpes simplex infection)	ENOG410XR55(J:Translation, ribosomal structure and biogenesis)	ENOG410XR55(Nuclear RNA export factor)	PF09162.10(Tap-RNA_bind:Tap, RNA-binding); PF02136.20(NTF2:Nuclear transport factor 2 (NTF2) domain); PF03943.13(TAP_C:TAP C-terminal domain); PF12799.7(LRR_4:Leucine Rich repeats (2 copies)); PF13855.6(LRR_8:Leucine rich repeat)	sp|Q9UBU9|NXF1_HUMAN(Nuclear RNA export factor 1 OS=Homo sapiens OX=9606 GN=NXF1 PE=1 SV=1)	10482
ENSG00000176046	NUPR1	nuclear protein 1, transcriptional regulator [Source:HGNC Symbol;Acc:HGNC:29990]	550	2.67313	1.41853	9.84479e-240	3.48396e-237	yes	up	2121.27	1854.4	1815.9	4604	4415	4658	138.25	124.7	123.7	242.45	253.08	327.95	128.883	274.493	NP_001035948.1(nuclear protein 1 isoform a [Homo sapiens])	GO:0048147(biological_process:negative regulation of fibroblast proliferation); GO:0009636(biological_process:response to toxic substance); GO:0006473(biological_process:protein acetylation); GO:0050680(biological_process:negative regulation of epithelial cell proliferation); GO:0008584(biological_process:male gonad development); GO:0010667(biological_process:negative regulation of cardiac muscle…	K15626	NUPR1, COM1	map05202(Transcriptional misregulation in cancer)	ENOG4112B8R(K:Transcription)	ENOG4112B8R(nuclear protein transcriptional regulator)	PF10195.9(Phospho_p8:DNA-binding nuclear phosphoprotein p8)	sp|O60356|NUPR1_HUMAN(Nuclear protein 1 OS=Homo sapiens OX=9606 GN=NUPR1 PE=1 SV=1)	26471
ENSG00000138413	IDH1	isocitrate dehydrogenase (NADP(+)) 1, cytosolic [Source:HGNC Symbol;Acc:HGNC:5382]	2441	1.82882	0.870916	2.0228e-238	7.04662e-236	no	up	10213.5	9229	9302	15578	15645	15271	372.07	376.97	376.45	517.03	535.98	530.56	375.163	527.857	NP_005887.2(isocitrate dehydrogenase [NADP] cytoplasmic [Homo sapiens])	GO:0006739(biological_process:NADP metabolic process); GO:0005782(cellular_component:peroxisomal matrix); GO:0051287(molecular_function:NAD binding); GO:0008585(biological_process:female gonad development); GO:1904813(cellular_component:ficolin-1-rich granule lumen); GO:0006099(biological_process:tricarboxylic acid cycle); GO:0006097(biological_process:glyoxylate cycle); GO:0014070(biological_pro…	K00031	IDH1, IDH2, icd	map00020(Citrate cycle (TCA cycle)); map04146(Peroxisome); map00480(Glutathione metabolism)	COG0538(C:Energy production and conversion)	COG0538(isocitrate dehydrogenase (NADp))	PF00180.20(Iso_dh:Isocitrate/isopropylmalate dehydrogenase)	sp|O75874|IDHC_HUMAN(Isocitrate dehydrogenase [NADP] cytoplasmic OS=Homo sapiens OX=9606 GN=IDH1 PE=1 SV=2)	3417
ENSG00000120738	EGR1	early growth response 1 [Source:HGNC Symbol;Acc:HGNC:3238]	3137	4.93693	2.30362	2.4857e-231	8.52596e-229	yes	up	570	529	438	2214	2192	2296	14.04	14.7	11.93	51.57	52.88	54.97	13.5567	53.14	XP_008012755.1(PREDICTED: early growth response protein 1 [Chlorocebus sabaeus])	GO:0032922(biological_process:circadian regulation of gene expression); GO:0003676(molecular_function:nucleic acid binding); GO:0071480(biological_process:cellular response to gamma radiation); GO:2000182(biological_process:regulation of progesterone biosynthetic process); GO:0030509(biological_process:BMP signaling pathway); GO:0010628(biological_process:positive regulation of gene expression); …	K09203	EGR1	map05166(Human T-cell leukemia virus 1 infection); map04928(Parathyroid hormone synthesis, secretion and action); map04912(GnRH signaling pathway); map04933(AGE-RAGE signaling pathway in diabetic complications); map05020(Prion diseases)	COG5048(S:Function unknown)	COG5048(tubulin tyrosine ligase-like family, member 12)	PF11914.8(DUF3432:Domain of unknown function (DUF3432)); PF11928.8(DUF3446:Early growth response N-terminal domain); PF13465.6(zf-H2C2_2:Zinc-finger double domain); PF00096.26(zf-C2H2:Zinc finger, C2H2 type); PF13894.6(zf-C2H2_4:C2H2-type zinc finger)	sp|P18146|EGR1_HUMAN(Early growth response protein 1 OS=Homo sapiens OX=9606 GN=EGR1 PE=1 SV=1)	1958
ENSG00000156508	EEF1A1	eukaryotic translation elongation factor 1 alpha 1 [Source:HGNC Symbol;Acc:HGNC:3189]	4441	1.65303	0.725109	8.6195e-231	2.91169e-228	no	up	104004	93704.5	96860.8	146033	140559	144273	4183.86	4181.26	4264.86	5600.13	5569.93	5417.97	4209.99	5529.34	XP_011977736.1(PREDICTED: elongation factor 1-alpha 1 isoform X2 [Ovis aries musimon])	GO:1904714(biological_process:regulation of chaperone-mediated autophagy); GO:0098574(cellular_component:cytoplasmic side of lysosomal membrane); GO:1904813(cellular_component:ficolin-1-rich granule lumen); GO:0005737(cellular_component:cytoplasm); GO:0000049(molecular_function:tRNA binding); GO:0005853(cellular_component:eukaryotic translation elongation factor 1 complex); GO:0005730(cellular_co…	K03231	EEF1A	map05134(Legionellosis); map03013(RNA transport)	COG5256(J:Translation, ribosomal structure and biogenesis)	COG5256(This protein promotes the GTP-dependent binding of aminoacyl-tRNA to the A-site of ribosomes during protein biosynthesis (By similarity))	PF00009.27(GTP_EFTU:Elongation factor Tu GTP binding domain); PF03143.17(GTP_EFTU_D3:Elongation factor Tu C-terminal domain); PF03144.25(GTP_EFTU_D2:Elongation factor Tu domain 2); PF01926.23(MMR_HSR1:50S ribosome-binding GTPase)	sp|P68103|EF1A1_BOVIN(Elongation factor 1-alpha 1 OS=Bos taurus OX=9913 GN=EEF1A1 PE=1 SV=1)	1915
ENSG00000198911	SREBF2	sterol regulatory element binding transcription factor 2 [Source:HGNC Symbol;Acc:HGNC:11290]	5237	2.63261	1.39649	2.45887e-230	8.18217e-228	yes	up	2509.62	2414.78	2261.56	5641.71	5403.66	5696.73	36.97	41.67	37.75	81.89	79.76	79.77	38.7967	80.4733	AAH51799.1(SREBF2 protein, partial [Homo sapiens])	GO:0008022(molecular_function:protein C-terminus binding); GO:0016021(cellular_component:integral component of membrane); GO:0005829(cellular_component:cytosol); GO:0005789(cellular_component:endoplasmic reticulum membrane); GO:0003677(molecular_function:DNA binding); GO:1902895(biological_process:positive regulation of pri-miRNA transcription from RNA polymerase II promoter); GO:0070888(molecula…	K09107	SREBP2, SREBF2		ENOG410XSVP(K:Transcription)	ENOG410XSVP(sterol regulatory element binding transcription factor)	PF00010.26(HLH:Helix-loop-helix DNA-binding domain)	sp|Q12772|SRBP2_HUMAN(Sterol regulatory element-binding protein 2 OS=Homo sapiens OX=9606 GN=SREBF2 PE=1 SV=2)	6721
ENSG00000143375	CGN	cingulin [Source:HGNC Symbol;Acc:HGNC:17429]	5101	0.398907	-1.32587	1.47421e-228	4.83346e-226	yes	down	5670	4911	4920	1830	1795	1838	90.04	93.08	88.85	27.87	27.35	27.36	90.6567	27.5267	NP_065821.1(cingulin [Homo sapiens])	GO:0008092(molecular_function:cytoskeletal protein binding); GO:0051493(biological_process:regulation of cytoskeleton organization); GO:0045296(molecular_function:cadherin binding); GO:0005923(cellular_component:bicellular tight junction); GO:0003779(molecular_function:actin binding); GO:0016459(cellular_component:myosin complex); GO:0008150(biological_process:biological_process); GO:0007179(biol…	K06102	CGN	map04530(Tight junction)	ENOG410YEC7(Z:Cytoskeleton)	ENOG410YEC7(cingulin-like 1)	PF01576.19(Myosin_tail_1:Myosin tail); PF18595.1(DHR10:Designed helical repeat protein 10 domain); PF11559.8(ADIP:Afadin- and alpha -actinin-Binding)	sp|Q9P2M7|CING_HUMAN(Cingulin OS=Homo sapiens OX=9606 GN=CGN PE=1 SV=2)	57530
ENSG00000111885	MAN1A1	mannosidase alpha class 1A member 1 [Source:HGNC Symbol;Acc:HGNC:6821]	5018	2.40424	1.26558	3.20871e-228	1.03679e-225	yes	up	7903	6894	6330	14403	14833	15587	116.26	114.01	102.83	200.46	213.62	222.32	111.033	212.133	XP_005267043.1(mannosyl-oligosaccharide 1,2-alpha-mannosidase IA isoform X1 [Homo sapiens])	GO:0005794(cellular_component:Golgi apparatus); GO:0015923(molecular_function:mannosidase activity); GO:1904381(biological_process:Golgi apparatus mannose trimming); GO:0005793(cellular_component:endoplasmic reticulum-Golgi intermediate compartment); GO:0006486(biological_process:protein glycosylation); GO:0070062(cellular_component:extracellular exosome); GO:0005829(cellular_component:cytosol); …	K01230	MAN1	map00510(N-Glycan biosynthesis); map04141(Protein processing in endoplasmic reticulum)	ENOG410XP04(S:Function unknown)	ENOG410XP04(Mannosidase alpha class)	PF01532.20(Glyco_hydro_47:Glycosyl hydrolase family 47)	sp|P33908|MA1A1_HUMAN(Mannosyl-oligosaccharide 1,2-alpha-mannosidase IA OS=Homo sapiens OX=9606 GN=MAN1A1 PE=1 SV=3)	4121
ENSG00000198788	MUC2	mucin 2, oligomeric mucus/gel-forming [Source:HGNC Symbol;Acc:HGNC:7512]	393	11.5732	3.53271	6.12637e-226	1.95125e-223	yes	up	136	117	114	1301	1138	1314	1	0.98	0.92	10.68	8.99	11.87	0.966667	10.5133	AZL49145.1(mucin 2 [Homo sapiens])	GO:0005796(cellular_component:Golgi lumen); GO:0070702(cellular_component:inner mucus layer); GO:0070703(cellular_component:outer mucus layer); GO:0070701(cellular_component:mucus layer); GO:0016266(biological_process:O-glycan processing); GO:0030277(biological_process:maintenance of gastrointestinal epithelium); GO:0005886(cellular_component:plasma membrane); GO:0062023(cellular_component:collag…	K10955	MUC2	map05226(Gastric cancer); map05146(Amoebiasis)	ENOG410YA0C(O:Posttranslational modification, protein turnover, chaperones); ENOG410XNSK(O:Posttranslational modification, protein turnover, chaperones)	ENOG410YA0C(C8 domain); ENOG410XNSK(C8 domain)	PF00094.25(VWD:von Willebrand factor type D domain)	sp|Q02817|MUC2_HUMAN(Mucin-2 OS=Homo sapiens OX=9606 GN=MUC2 PE=1 SV=2)	4583
ENSG00000116962	NID1	nidogen 1 [Source:HGNC Symbol;Acc:HGNC:7821]	5792	2.31387	1.21031	7.35708e-226	2.31023e-223	yes	up	3195	2795	2856	6159	5803	6131	41.01	40.35	40.65	74.88	73.5	76.46	40.67	74.9467	NP_002499.2(nidogen-1 precursor [Homo sapiens])	GO:0005201(molecular_function:extracellular matrix structural constituent); GO:0050840(molecular_function:extracellular matrix binding); GO:0031012(cellular_component:extracellular matrix); GO:0007160(biological_process:cell-matrix adhesion); GO:0071944(cellular_component:cell periphery); GO:0070062(cellular_component:extracellular exosome); GO:0005576(cellular_component:extracellular region); GO…	K06826	NID		ENOG410XR8N(S:Function unknown)	ENOG410XR8N(beige BEACH domain containing protein)	PF07474.12(G2F:G2F domain); PF00058.17(Ldl_recept_b:Low-density lipoprotein receptor repeat class B); PF12947.7(EGF_3:EGF domain); PF06119.14(NIDO:Nidogen-like); PF00086.18(Thyroglobulin_1:Thyroglobulin type-1 repeat); PF12662.7(cEGF:Complement Clr-like EGF-like); PF00008.27(EGF:EGF-like domain); PF14670.6(FXa_inhibition:Coagulation Factor Xa inhibitory site); PF07645.15(EGF_CA:Calcium-binding EG…	sp|P14543|NID1_HUMAN(Nidogen-1 OS=Homo sapiens OX=9606 GN=NID1 PE=1 SV=3)	4811
ENSG00000166986	MARS	methionyl-tRNA synthetase [Source:HGNC Symbol;Acc:HGNC:6898]	2797	1.93563	0.952801	1.30448e-224	4.03935e-222	no	up	6350.61	5565.91	5707.12	10313.2	9781.6	10062.6	382.74	310.52	333.78	415.55	476.15	413.51	342.347	435.07	NP_004981.2(methionine--tRNA ligase, cytoplasmic [Homo sapiens])	GO:0017101(cellular_component:aminoacyl-tRNA synthetase multienzyme complex); GO:0006431(biological_process:methionyl-tRNA aminoacylation); GO:0032869(biological_process:cellular response to insulin stimulus); GO:0005737(cellular_component:cytoplasm); GO:0000049(molecular_function:tRNA binding); GO:0070062(cellular_component:extracellular exosome); GO:0005730(cellular_component:nucleolus); GO:000…	K01874	MARS, metG	map00450(Selenocompound metabolism); map00970(Aminoacyl-tRNA biosynthesis)	COG0143(J:Translation, ribosomal structure and biogenesis)	COG0143(Is required not only for elongation of protein synthesis but also for the initiation of all mRNA translation through initiator tRNA(fMet) aminoacylation (By similarity))	PF09334.11(tRNA-synt_1g:tRNA synthetases class I (M)); PF18485.1(GST_N_5:Glutathione S-transferase, N-terminal domain); PF00458.20(WHEP-TRS:WHEP-TRS domain); PF00133.22(tRNA-synt_1:tRNA synthetases class I (I, L, M and V)); PF00043.25(GST_C:Glutathione S-transferase, C-terminal domain); PF13410.6(GST_C_2:Glutathione S-transferase, C-terminal domain); PF08264.13(Anticodon_1:Anticodon-binding domai…	sp|P56192|SYMC_HUMAN(Methionine--tRNA ligase, cytoplasmic OS=Homo sapiens OX=9606 GN=MARS PE=1 SV=2)	4141
ENSG00000068650	ATP11A	ATPase phospholipid transporting 11A [Source:HGNC Symbol;Acc:HGNC:13552]	8768	2.74638	1.45753	1.86092e-221	5.68345e-219	yes	up	1714	1507	1584	3857	3871	3939	20.08	20.22	20.3	41.28	39.05	36.34	20.2	38.89	NP_115565.3(probable phospholipid-transporting ATPase IH isoform b [Homo sapiens])	GO:0140326(molecular_function:ATPase-coupled intramembrane lipid transporter activity); GO:0070821(cellular_component:tertiary granule membrane); GO:0004012(molecular_function:phospholipid-translocating ATPase activity); GO:0043231(cellular_component:intracellular membrane-bounded organelle); GO:0015914(biological_process:phospholipid transport); GO:0016021(cellular_component:integral component o…	K01530	E7.6.2.1		COG0474(S:Function unknown)	COG0474(chromosome 13 open reading frame)	PF16212.5(PhoLip_ATPase_C:Phospholipid-translocating P-type ATPase C-terminal); PF16209.5(PhoLip_ATPase_N:Phospholipid-translocating ATPase N-terminal); PF00702.26(Hydrolase:haloacid dehalogenase-like hydrolase); PF13246.6(Cation_ATPase:Cation transport ATPase (P-type)); PF00122.20(E1-E2_ATPase:E1-E2 ATPase)	sp|P98196|AT11A_HUMAN(Probable phospholipid-transporting ATPase IH OS=Homo sapiens OX=9606 GN=ATP11A PE=1 SV=3)	23250
ENSG00000173482	PTPRM	protein tyrosine phosphatase receptor type M [Source:HGNC Symbol;Acc:HGNC:9675]	5941	3.59088	1.84434	4.08175e-221	1.22977e-218	yes	up	1222	1094	1030	3369	3458	3786	24.3	26.36	22	67.97	74.19	73.8	24.22	71.9867	NP_001098714.1(receptor-type tyrosine-protein phosphatase mu isoform 1 precursor [Homo sapiens])	GO:0016791(molecular_function:phosphatase activity); GO:0005911(cellular_component:cell-cell junction); GO:0016311(biological_process:dephosphorylation); GO:0006470(biological_process:protein dephosphorylation); GO:0010842(biological_process:retina layer formation); GO:0007165(biological_process:signal transduction); GO:0031175(biological_process:neuron projection development); GO:0035335(biologi…	K05693	PTPRM	map04514(Cell adhesion molecules (CAMs)); map04520(Adherens junction)	COG5599(S:Function unknown)	COG5599(Solute carrier family 25 member)	PF00102.27(Y_phosphatase:Protein-tyrosine phosphatase); PF00629.23(MAM:MAM domain, meprin/A5/mu); PF00041.21(fn3:Fibronectin type III domain); PF00047.25(ig:Immunoglobulin domain); PF00782.20(DSPc:Dual specificity phosphatase, catalytic domain); PF07679.16(I-set:Immunoglobulin I-set domain); PF13350.6(Y_phosphatase3:Tyrosine phosphatase family); PF13927.6(Ig_3:Immunoglobulin domain)	sp|P28827|PTPRM_HUMAN(Receptor-type tyrosine-protein phosphatase mu OS=Homo sapiens OX=9606 GN=PTPRM PE=1 SV=2)	5797
ENSG00000181143	MUC16	mucin 16, cell surface associated [Source:HGNC Symbol;Acc:HGNC:15582]	43816	4.83082	2.27227	1.04576e-220	3.1087e-218	yes	up	469	404	390	1852	1799	1739	2.27	2.41	2.34	9.99	9.42	8.52	2.34	9.31	NP_078966.2(mucin-16 [Homo sapiens])	GO:0005796(cellular_component:Golgi lumen); GO:0070062(cellular_component:extracellular exosome); GO:0005615(cellular_component:extracellular space); GO:0016021(cellular_component:integral component of membrane); GO:0016020(cellular_component:membrane); GO:0031982(cellular_component:vesicle); GO:0019898(cellular_component:extrinsic component of membrane); GO:0016266(biological_process:O-glycan pr…	K16145	MUC16, CA125		ENOG4111B0P(S:Function unknown)	ENOG4111B0P(Mucin 16, cell surface associated)	PF01390.20(SEA:SEA domain)	sp|Q8WXI7|MUC16_HUMAN(Mucin-16 OS=Homo sapiens OX=9606 GN=MUC16 PE=1 SV=3)	94025
ENSG00000047457	CP	ceruloplasmin [Source:HGNC Symbol;Acc:HGNC:2295]	4452	2.00099	1.00072	6.4389e-218	1.88888e-215	yes	up	5621.21	5016.45	4857.3	9481.25	9009.6	8914.46	127.62	116.76	138.69	179.13	199.96	172.37	127.69	183.82	NP_000087.2(ceruloplasmin precursor [Homo sapiens])	GO:0016491(molecular_function:oxidoreductase activity); GO:0044267(biological_process:cellular protein metabolic process); GO:0046872(molecular_function:metal ion binding); GO:0006879(biological_process:cellular iron ion homeostasis); GO:0070062(cellular_component:extracellular exosome); GO:0005615(cellular_component:extracellular space); GO:0004322(molecular_function:ferroxidase activity); GO:00…	K13624	CP	map00860(Porphyrin and chlorophyll metabolism)	COG2132(Q:Secondary metabolites biosynthesis, transport and catabolism)	COG2132(Multicopper oxidase)	PF07731.14(Cu-oxidase_2:Multicopper oxidase); PF07732.15(Cu-oxidase_3:Multicopper oxidase); PF00394.22(Cu-oxidase:Multicopper oxidase)	sp|P00450|CERU_HUMAN(Ceruloplasmin OS=Homo sapiens OX=9606 GN=CP PE=1 SV=1)	1356
ENSG00000111275	ALDH2	aldehyde dehydrogenase 2 family member [Source:HGNC Symbol;Acc:HGNC:404]	9561	2.00351	1.00253	7.31589e-215	2.11828e-212	yes	up	5021.96	4337.97	4447.57	8245.39	7953.34	8248.88	168.8	162.21	166.63	267.04	262.74	262.67	165.88	264.15	XP_002808038.3(aldehyde dehydrogenase, mitochondrial [Macaca mulatta])	GO:0016491(molecular_function:oxidoreductase activity); GO:0004030(molecular_function:aldehyde dehydrogenase [NAD(P)+] activity); GO:0005975(biological_process:carbohydrate metabolic process); GO:0004029(molecular_function:aldehyde dehydrogenase (NAD) activity); GO:0043878(molecular_function:glyceraldehyde-3-phosphate dehydrogenase (NAD+) (non-phosphorylating) activity); GO:0051287(molecular_func…	K00128	ALDH	map00310(Lysine degradation); map00280(Valine, leucine and isoleucine degradation); map00981(Insect hormone biosynthesis); map00340(Histidine metabolism); map00330(Arginine and proline metabolism); map00053(Ascorbate and aldarate metabolism); map00380(Tryptophan metabolism); map00010(Glycolysis / Gluconeogenesis); map00620(Pyruvate metabolism); map00071(Fatty acid degradation); map00561(Glyceroli…	COG1012(C:Energy production and conversion)	COG1012(Dehydrogenase)	PF00171.22(Aldedh:Aldehyde dehydrogenase family)	sp|P05091|ALDH2_HUMAN(Aldehyde dehydrogenase, mitochondrial OS=Homo sapiens OX=9606 GN=ALDH2 PE=1 SV=2)	217
ENSG00000184640	SEPTIN9	septin 9 [Source:HGNC Symbol;Acc:HGNC:7323]	3733	2.84782	1.50986	4.09803e-212	1.17135e-209	yes	up	1483	1299	1325	3548	3307	3484	38.54	39.75	41.8	85.11	82.75	84.45	40.03	84.1033	NP_001106963.1(septin-9 isoform a [Homo sapiens])	GO:0005737(cellular_component:cytoplasm); GO:0001725(cellular_component:stress fiber); GO:0031105(cellular_component:septin complex); GO:0015630(cellular_component:microtubule cytoskeleton); GO:0005940(cellular_component:septin ring); GO:0015629(cellular_component:actin cytoskeleton); GO:0051301(biological_process:cell division); GO:0003924(molecular_function:GTPase activity); GO:0005856(cellular…	K16938	SEPT3_9_12	map05100(Bacterial invasion of epithelial cells)	COG5019(D:Cell cycle control, cell division, chromosome partitioning); COG5019(Z:Cytoskeleton)	COG5019(Cell division control protein); COG5019(Cell division control protein)	PF00735.18(Septin:Septin); PF01926.23(MMR_HSR1:50S ribosome-binding GTPase); PF03193.16(RsgA_GTPase:RsgA GTPase); PF04548.16(AIG1:AIG1 family); PF00009.27(GTP_EFTU:Elongation factor Tu GTP binding domain); PF00350.23(Dynamin_N:Dynamin family); PF08477.13(Roc:Ras of Complex, Roc, domain of DAPkinase); PF00071.22(Ras:Ras family)	sp|Q9UHD8|SEPT9_HUMAN(Septin-9 OS=Homo sapiens OX=9606 GN=SEPT9 PE=1 SV=2)	10801
ENSG00000052802	MSMO1	methylsterol monooxygenase 1 [Source:HGNC Symbol;Acc:HGNC:10545]	2227	4.59015	2.19854	3.24064e-207	9.14559e-205	yes	up	628	626.69	529	2500	2510	2235	24.88	28.65	22.8	94.36	94.77	89.38	25.4433	92.8367	NP_006736.1(methylsterol monooxygenase 1 isoform 1 [Homo sapiens])	GO:0016126(biological_process:sterol biosynthetic process); GO:0016020(cellular_component:membrane); GO:0006631(biological_process:fatty acid metabolic process); GO:0000254(molecular_function:C-4 methylsterol oxidase activity); GO:0005783(cellular_component:endoplasmic reticulum); GO:0016021(cellular_component:integral component of membrane); GO:0006629(biological_process:lipid metabolic process)…	K07750	MESO1, ERG25	map00100(Steroid biosynthesis)	COG3000(I:Lipid transport and metabolism)	COG3000(fatty acid hydroxylase)	PF04116.13(FA_hydroxylase:Fatty acid hydroxylase superfamily)	sp|Q15800|MSMO1_HUMAN(Methylsterol monooxygenase 1 OS=Homo sapiens OX=9606 GN=MSMO1 PE=1 SV=1)	6307
ENSG00000186480	INSIG1	insulin induced gene 1 [Source:HGNC Symbol;Acc:HGNC:6083]	2908	4.06712	2.02401	1.45133e-204	4.04467e-202	yes	up	633	537	515	2081	1945	2026	21.28	21.08	18.38	67.13	63	63.8	20.2467	64.6433	NP_005533.2(insulin-induced gene 1 protein isoform 1 [Homo sapiens])	GO:0016126(biological_process:sterol biosynthetic process); GO:0005783(cellular_component:endoplasmic reticulum); GO:0060363(biological_process:cranial suture morphogenesis); GO:0005789(cellular_component:endoplasmic reticulum membrane); GO:0042632(biological_process:cholesterol homeostasis); GO:0070862(biological_process:negative regulation of protein exit from endoplasmic reticulum); GO:1901303…				ENOG410XQ2M(U:Intracellular trafficking, secretion, and vesicular transport)	ENOG410XQ2M(insulin induced gene)	PF07281.12(INSIG:Insulin-induced protein (INSIG))	sp|O15503|INSI1_HUMAN(Insulin-induced gene 1 protein OS=Homo sapiens OX=9606 GN=INSIG1 PE=1 SV=3)	3638
ENSG00000143924	EML4	EMAP like 4 [Source:HGNC Symbol;Acc:HGNC:1316]	3797	2.0038	1.00274	5.89208e-204	1.62178e-201	yes	up	4446	3938	3830	7349	7187	7092.99	63.09	62.24	59.42	98.59	98	96.51	61.5833	97.7	XP_005264324.1(echinoderm microtubule-associated protein-like 4 isoform X1 [Homo sapiens])	GO:0005737(cellular_component:cytoplasm); GO:0007017(biological_process:microtubule-based process); GO:0000278(biological_process:mitotic cell cycle); GO:0008017(molecular_function:microtubule binding); GO:0016020(cellular_component:membrane); GO:0000226(biological_process:microtubule cytoskeleton organization); GO:0005515(molecular_function:protein binding); GO:0005874(cellular_component:microtu…	K15420	EML4	map05223(Non-small cell lung cancer); map05200(Pathways in cancer)	COG2319(S:Function unknown)	COG2319(wd repeat)	PF00400.32(WD40:WD domain, G-beta repeat); PF03451.14(HELP:HELP motif)	sp|Q9HC35|EMAL4_HUMAN(Echinoderm microtubule-associated protein-like 4 OS=Homo sapiens OX=9606 GN=EML4 PE=1 SV=3)	27436
ENSG00000111057	KRT18	keratin 18 [Source:HGNC Symbol;Acc:HGNC:6430]	1420	1.70628	0.770853	7.37149e-204	2.00424e-201	no	up	23079.9	20425.9	20552.2	32263	31200.7	33155.3	1451.14	1455.48	1429	1916.19	1913.02	2046.23	1445.21	1958.48	NP_000215.1(keratin, type I cytoskeletal 18 [Homo sapiens])	GO:0045095(cellular_component:keratin filament); GO:0097191(biological_process:extrinsic apoptotic signaling pathway); GO:0071944(cellular_component:cell periphery); GO:0033209(biological_process:tumor necrosis factor-mediated signaling pathway); GO:0005815(cellular_component:microtubule organizing center); GO:0007049(biological_process:cell cycle); GO:0005737(cellular_component:cytoplasm); GO:00…	K07604	KRT1	map04915(Estrogen signaling pathway)	ENOG4111DJ8(S:Function unknown)	ENOG4111DJ8(Keratin 18)	PF00038.21(Filament:Intermediate filament protein)	sp|P05783|K1C18_HUMAN(Keratin, type I cytoskeletal 18 OS=Homo sapiens OX=9606 GN=KRT18 PE=1 SV=2)	3875
ENSG00000142657	PGD	phosphogluconate dehydrogenase [Source:HGNC Symbol;Acc:HGNC:8891]	2268	2.05488	1.03905	2.34374e-202	6.29562e-200	yes	up	8889	8277	8479	15703	14912	16040	325.81	342.15	341.15	542.06	530.38	565.72	336.37	546.053	XP_016793071.1(6-phosphogluconate dehydrogenase, decarboxylating isoform X1 [Pan troglodytes])	GO:0005737(cellular_component:cytoplasm); GO:0050661(molecular_function:NADP binding); GO:0019322(biological_process:pentose biosynthetic process); GO:0070062(cellular_component:extracellular exosome); GO:0019521(biological_process:D-gluconate metabolic process); GO:0005829(cellular_component:cytosol); GO:0046177(biological_process:D-gluconate catabolic process); GO:0006098(biological_process:pen…	K00033	PGD, gnd, gntZ	map00480(Glutathione metabolism); map00030(Pentose phosphate pathway)	COG0362(G:Carbohydrate transport and metabolism)	COG0362(Catalyzes the oxidative decarboxylation of 6- phosphogluconate to ribulose 5-phosphate and CO(2), with concomitant reduction of NADP to NADPH (By similarity))	PF00393.19(6PGD:6-phosphogluconate dehydrogenase, C-terminal domain); PF03446.15(NAD_binding_2:NAD binding domain of 6-phosphogluconate dehydrogenase)	sp|P52209|6PGD_HUMAN(6-phosphogluconate dehydrogenase, decarboxylating OS=Homo sapiens OX=9606 GN=PGD PE=1 SV=3)	5226
ENSG00000226985	LINC01203	long intergenic non-protein coding RNA 1203 [Source:HGNC Symbol;Acc:HGNC:49634]	2775	2.62492	1.39228	2.88941e-202	7.66898e-200	yes	up	1669.64	1486.21	1499.63	3717.41	3516.35	3573.25	21.36	22.03	22.38	53.05	50.36	53	21.9233	52.1367	XP_012358188.1(PREDICTED: LOW QUALITY PROTEIN: uncharacterized protein LOC101179517, partial [Nomascus leucogenys])	GO:0006355(biological_process:regulation of transcription, DNA-templated); GO:0016021(cellular_component:integral component of membrane); GO:0000785(cellular_component:chromatin); GO:0005634(cellular_component:nucleus); GO:0003677(molecular_function:DNA binding)	K01064	WNT9	map05205(Proteoglycans in cancer); map05165(Human papillomavirus infection); map04390(Hippo signaling pathway); map05200(Pathways in cancer); map04550(Signaling pathways regulating pluripotency of stem cells); map05217(Basal cell carcinoma); map04310(Wnt signaling pathway); map05225(Hepatocellular carcinoma); map05224(Breast cancer); map04934(Cushing syndrome); map05226(Gastric cancer); map04150(…	ENOG410YX46(S:Function unknown); ENOG410YY0X(S:Function unknown); ENOG410YX7N(S:Function unknown); ENOG410YYHK(S:Function unknown); ENOG410YZTZ(S:Function unknown)	ENOG410YX46(-); ENOG410YY0X(-); ENOG410YX7N(-); ENOG410YYHK(-); ENOG410YZTZ(-)		sp|Q86U02|CN165_HUMAN(Putative uncharacterized protein encoded by LINC00596 OS=Homo sapiens OX=9606 GN=LINC00596 PE=5 SV=1)
ENSG00000100889	PCK2	phosphoenolpyruvate carboxykinase 2, mitochondrial [Source:HGNC Symbol;Acc:HGNC:8725]	2179	2.35674	1.23679	5.05674e-200	1.32635e-197	yes	up	2693	2436	2527	5450	5124	5389	106.66	109.74	113.05	211.82	200.88	206.85	109.817	206.517	NP_004554.3(phosphoenolpyruvate carboxykinase [GTP], mitochondrial isoform 1 precursor [Homo sapiens])	GO:0042594(biological_process:response to starvation); GO:0016310(biological_process:phosphorylation); GO:0046327(biological_process:glycerol biosynthetic process from pyruvate); GO:0032869(biological_process:cellular response to insulin stimulus); GO:0006090(biological_process:pyruvate metabolic process); GO:0006094(biological_process:gluconeogenesis); GO:0033993(biological_process:response to l…	K01596	E4.1.1.32, pckA, PCK	map04152(AMPK signaling pathway); map00010(Glycolysis / Gluconeogenesis); map04964(Proximal tubule bicarbonate reclamation); map03320(PPAR signaling pathway); map04068(FoxO signaling pathway); map04920(Adipocytokine signaling pathway); map04922(Glucagon signaling pathway); map00620(Pyruvate metabolism); map04910(Insulin signaling pathway); map04151(PI3K-Akt signaling pathway); map00020(Citrate cy…	COG1274(C:Energy production and conversion)	COG1274(Catalyzes the conversion of oxaloacetate (OAA) to phosphoenolpyruvate (PEP), the rate-limiting step in the metabolic pathway that produces glucose from lactate and other precursors derived from the citric acid cycle (By similarity))	PF00821.18(PEPCK_GTP:Phosphoenolpyruvate carboxykinase C-terminal P-loop domain); PF17297.2(PEPCK_N:Phosphoenolpyruvate carboxykinase N-terminal domain)	sp|Q16822|PCKGM_HUMAN(Phosphoenolpyruvate carboxykinase [GTP], mitochondrial OS=Homo sapiens OX=9606 GN=PCK2 PE=1 SV=4)	5106
ENSG00000082781	ITGB5	integrin subunit beta 5 [Source:HGNC Symbol;Acc:HGNC:6160]	4440	2.42584	1.27849	1.90616e-198	4.94162e-196	yes	up	2474	2187	2312	5115	4783	5063	62.02	64.52	66.71	119.11	112.84	117.18	64.4167	116.377	NP_002204.2(integrin beta-5 isoform a precursor [Homo sapiens])	GO:0046718(biological_process:viral entry into host cell); GO:0038023(molecular_function:signaling receptor activity); GO:0007160(biological_process:cell-matrix adhesion); GO:0005925(cellular_component:focal adhesion); GO:0070062(cellular_component:extracellular exosome); GO:0016021(cellular_component:integral component of membrane); GO:0016020(cellular_component:membrane); GO:0002479(biological_…	K06588	ITGB5	map05205(Proteoglycans in cancer); map05165(Human papillomavirus infection); map04510(Focal adhesion); map04810(Regulation of actin cytoskeleton); map04512(ECM-receptor interaction); map04151(PI3K-Akt signaling pathway); map05414(Dilated cardiomyopathy (DCM)); map05412(Arrhythmogenic right ventricular cardiomyopathy (ARVC)); map04145(Phagosome); map05410(Hypertrophic cardiomyopathy (HCM))	ENOG410XP60(F:Nucleotide transport and metabolism)	ENOG410XP60(Catalyzes the decarboxylation of orotidine 5'- monophosphate (OMP) to uridine 5'-monophosphate (UMP) (By similarity))	PF00362.18(Integrin_beta:Integrin beta chain VWA domain); PF08725.11(Integrin_b_cyt:Integrin beta cytoplasmic domain); PF07965.12(Integrin_B_tail:Integrin beta tail domain); PF17205.3(PSI_integrin:Integrin plexin domain); PF18372.1(I-EGF_1:Integrin beta epidermal growth factor like domain 1); PF07974.13(EGF_2:EGF-like domain)	sp|P18084|ITB5_HUMAN(Integrin beta-5 OS=Homo sapiens OX=9606 GN=ITGB5 PE=1 SV=1)	3693
ENSG00000133112	TPT1	tumor protein, translationally-controlled 1 [Source:HGNC Symbol;Acc:HGNC:12022]	4814	1.73937	0.798563	6.6865e-197	1.71351e-194	no	up	9588.02	8654	8417.77	13690	13704	13600	990.51	1001.65	943.64	1345.58	1394.84	1302.81	978.6	1347.74	XP_017912255.1(PREDICTED: translationally-controlled tumor protein [Capra hircus])	GO:0005829(cellular_component:cytosol)				ENOG4111FVP(O:Posttranslational modification, protein turnover, chaperones)	ENOG4111FVP(cytochrome C oxidase subunit)	PF00838.17(TCTP:Translationally controlled tumour protein)	sp|P13693|TCTP_HUMAN(Translationally-controlled tumor protein OS=Homo sapiens OX=9606 GN=TPT1 PE=1 SV=1)	7178
ENSG00000075151	EIF4G3	eukaryotic translation initiation factor 4 gamma 3 [Source:HGNC Symbol;Acc:HGNC:3298]	5325	2.64252	1.40191	1.07462e-195	2.72258e-193	yes	up	1575	1383	1359	3435	3295	3351	22.85	24.4	22.26	48.79	48.88	47.13	23.17	48.2667	PNI33554.1(LOW QUALITY PROTEIN: EIF4G3 isoform 5, partial [Pan troglodytes])	GO:0000339(molecular_function:RNA cap binding); GO:0006413(biological_process:translational initiation); GO:0003723(molecular_function:RNA binding); GO:0005515(molecular_function:protein binding); GO:0003743(molecular_function:translation initiation factor activity)	K03260	EIF4G	map05416(Viral myocarditis); map03013(RNA transport)	ENOG410XS4P(J:Translation, ribosomal structure and biogenesis)	ENOG410XS4P(Eukaryotic translation initiation factor 4 gamma)	PF02854.19(MIF4G:MIF4G domain); PF02847.17(MA3:MA3 domain); PF02020.18(W2:eIF4-gamma/eIF5/eIF2-epsilon)	sp|O43432|IF4G3_HUMAN(Eukaryotic translation initiation factor 4 gamma 3 OS=Homo sapiens OX=9606 GN=EIF4G3 PE=1 SV=2)	8672
ENSG00000103257	SLC7A5	solute carrier family 7 member 5 [Source:HGNC Symbol;Acc:HGNC:11063]	4556	2.16314	1.11313	3.41258e-194	8.54871e-192	yes	up	5421.78	5022.79	5075.88	9870.7	9505.35	10334.8	91.98	95.14	94.91	158.78	157.53	167.95	94.01	161.42	NP_003477.4(large neutral amino acids transporter small subunit 1 [Homo sapiens])	GO:0098591(cellular_component:external side of apical plasma membrane); GO:0006520(biological_process:cellular amino acid metabolic process); GO:0030154(biological_process:cell differentiation); GO:0015803(biological_process:branched-chain amino acid transport); GO:0050900(biological_process:leukocyte migration); GO:1990184(cellular_component:amino acid transport complex); GO:0070062(cellular_com…	K13780	SLC7A5, LAT1	map05230(Central carbon metabolism in cancer); map04150(mTOR signaling pathway)	COG0531(E:Amino acid transport and metabolism)	COG0531(amino acid)	PF13520.6(AA_permease_2:Amino acid permease); PF00324.21(AA_permease:Amino acid permease)	sp|Q01650|LAT1_HUMAN(Large neutral amino acids transporter small subunit 1 OS=Homo sapiens OX=9606 GN=SLC7A5 PE=1 SV=2)	8140
ENSG00000090382	LYZ	lysozyme [Source:HGNC Symbol;Acc:HGNC:6740]	1530	2.09667	1.0681	4.91187e-191	1.21678e-188	yes	up	6866.05	5801.56	6214.13	12055.5	11966.4	10967.8	456.3	431.51	433.54	743.56	742.79	691.49	440.45	725.947	NP_000230.1(lysozyme C precursor [Homo sapiens])	GO:0008152(biological_process:metabolic process); GO:0019730(biological_process:antimicrobial humoral response); GO:0016798(molecular_function:hydrolase activity, acting on glycosyl bonds); GO:0003796(molecular_function:lysozyme activity); GO:0035578(cellular_component:azurophil granule lumen); GO:0042742(biological_process:defense response to bacterium); GO:0050829(biological_process:defense res…	K13915	LYZ	map04970(Salivary secretion)	ENOG4111QHM(G:Carbohydrate transport and metabolism)	ENOG4111QHM(those in tissues and body fluids are associated with the monocyte- macrophage system and enhance the activity of immunoagents)	PF00062.20(Lys:C-type lysozyme/alpha-lactalbumin family); PF01464.20(SLT:Transglycosylase SLT domain)	sp|P61626|LYSC_HUMAN(Lysozyme C OS=Homo sapiens OX=9606 GN=LYZ PE=1 SV=1)	4069
ENSG00000107957	SH3PXD2A	SH3 and PX domains 2A [Source:HGNC Symbol;Acc:HGNC:23664]	11468	3.23126	1.69209	3.80514e-190	9.3226e-188	yes	up	922	865	818	2552	2410	2483	5.68	6.02	5.54	14.87	14.59	14.63	5.74667	14.6967	Q5TCZ1.1(RecName: Full=SH3 and PX domain-containing protein 2A; AltName: Full=Adapter protein TKS5; AltName: Full=Five SH3 domain-containing protein; AltName: Full=SH3 multiple domains protein 1; AltName: Full=Tyrosine kinase substrate with five SH3 domains)	GO:0005737(cellular_component:cytoplasm); GO:0043085(biological_process:positive regulation of catalytic activity); GO:0002102(cellular_component:podosome); GO:0070273(molecular_function:phosphatidylinositol-4-phosphate binding); GO:0005515(molecular_function:protein binding); GO:0010314(molecular_function:phosphatidylinositol-5-phosphate binding); GO:0035091(molecular_function:phosphatidylinosit…				ENOG410YBFF(S:Function unknown)	ENOG410YBFF(phosphatidylinositol binding)	PF00018.28(SH3_1:SH3 domain); PF07653.17(SH3_2:Variant SH3 domain); PF14604.6(SH3_9:Variant SH3 domain); PF00787.24(PX:PX domain); PF08239.11(SH3_3:Bacterial SH3 domain)	sp|Q5TCZ1|SPD2A_HUMAN(SH3 and PX domain-containing protein 2A OS=Homo sapiens OX=9606 GN=SH3PXD2A PE=1 SV=1)	9644
ENSG00000175899	A2M	alpha-2-macroglobulin [Source:HGNC Symbol;Acc:HGNC:7]	4844	1.52252	0.606464	3.98837e-190	9.66528e-188	no	up	52147.2	45701.9	47109.9	66126	63536.4	65465.4	808.51	801.46	806.34	971	964.94	985.28	805.437	973.74	AAT02228.1(alpha 2 macroglobulin [Homo sapiens])	GO:0030414(molecular_function:peptidase inhibitor activity); GO:0051056(biological_process:regulation of small GTPase mediated signal transduction); GO:0007597(biological_process:blood coagulation, intrinsic pathway); GO:0019899(molecular_function:enzyme binding); GO:0048863(biological_process:stem cell differentiation); GO:0070062(cellular_component:extracellular exosome); GO:0031093(cellular_co…	K03910	A2M	map04610(Complement and coagulation cascades)	ENOG410XRED(S:Function unknown); ENOG410XQIV(S:Function unknown); COG2373(S:Function unknown)	ENOG410XRED(Complement component); ENOG410XQIV(Is able to inhibit all four classes of proteinases by a unique 'trapping' mechanism. This protein has a peptide stretch, called the 'bait region' which contains specific cleavage sites for different proteinases. When a proteinase cleaves the bait region, a conformational change is induced in the protein which traps the proteinase. The entrapped enzym…	PF07678.14(TED_complement:A-macroglobulin TED domain); PF07703.14(A2M_BRD:Alpha-2-macroglobulin bait region domain); PF00207.22(A2M:Alpha-2-macroglobulin family); PF17791.1(MG3:Macroglobulin domain MG3); PF17789.1(MG4:Macroglobulin domain MG4); PF07677.14(A2M_recep:A-macroglobulin receptor binding domain); PF01835.19(MG2:MG2 domain); PF05326.11(SVA:Seminal vesicle autoantigen (SVA))	sp|P01023|A2MG_HUMAN(Alpha-2-macroglobulin OS=Homo sapiens OX=9606 GN=A2M PE=1 SV=3)	2
ENSG00000115009	CCL20	C-C motif chemokine ligand 20 [Source:HGNC Symbol;Acc:HGNC:10619]	834	2.1679	1.1163	6.83945e-188	1.63963e-185	yes	up	3365	3009	2923	6039	6070	5706	438.1	450.49	421.54	737.38	765.54	743.24	436.71	748.72	NP_004582.1(C-C motif chemokine 20 isoform 1 precursor [Homo sapiens])	GO:0070098(biological_process:chemokine-mediated signaling pathway); GO:0005125(molecular_function:cytokine activity); GO:0019221(biological_process:cytokine-mediated signaling pathway); GO:0008009(molecular_function:chemokine activity); GO:0007165(biological_process:signal transduction); GO:0042742(biological_process:defense response to bacterium); GO:0060326(biological_process:cell chemotaxis);…	K14625	CCL20	map04060(Cytokine-cytokine receptor interaction); map04062(Chemokine signaling pathway); map05323(Rheumatoid arthritis); map04657(IL-17 signaling pathway); map04668(TNF signaling pathway)	ENOG410ZGME(O:Posttranslational modification, protein turnover, chaperones)	ENOG410ZGME(Chemokine (C-C motif) ligand 20)	PF00048.20(IL8:Small cytokines (intecrine/chemokine), interleukin-8 like)	sp|P78556|CCL20_HUMAN(C-C motif chemokine 20 OS=Homo sapiens OX=9606 GN=CCL20 PE=1 SV=1)	6364
ENSG00000157193	LRP8	LDL receptor related protein 8 [Source:HGNC Symbol;Acc:HGNC:6700]	7704	3.59621	1.84648	1.44059e-186	3.41681e-184	yes	up	832.97	687.32	736.39	2399.55	2257.62	2507.59	19.11	14.92	14.45	45.65	42.68	49.18	16.16	45.8367	NP_004622.2(low-density lipoprotein receptor-related protein 8 isoform 1 precursor [Homo sapiens])	GO:0038026(biological_process:reelin-mediated signaling pathway); GO:0038025(molecular_function:reelin receptor activity); GO:0019894(molecular_function:kinesin binding); GO:0030229(molecular_function:very-low-density lipoprotein particle receptor activity); GO:0019221(biological_process:cytokine-mediated signaling pathway); GO:0042493(biological_process:response to drug); GO:0032793(biological_p…	K20052	LRP8, APOER2		ENOG410YQ6J(U:Intracellular trafficking, secretion, and vesicular transport)	ENOG410YQ6J(low density lipoprotein)	PF00057.18(Ldl_recept_a:Low-density lipoprotein receptor domain class A); PF00058.17(Ldl_recept_b:Low-density lipoprotein receptor repeat class B); PF14670.6(FXa_inhibition:Coagulation Factor Xa inhibitory site); PF08450.12(SGL:SMP-30/Gluconolactonase/LRE-like region); PF12662.7(cEGF:Complement Clr-like EGF-like); PF07645.15(EGF_CA:Calcium-binding EGF domain); PF16472.5(DUF5050:Domain of unknown …	sp|Q14114|LRP8_HUMAN(Low-density lipoprotein receptor-related protein 8 OS=Homo sapiens OX=9606 GN=LRP8 PE=1 SV=4)	7804
ENSG00000161011	SQSTM1	sequestosome 1 [Source:HGNC Symbol;Acc:HGNC:11280]	2840	1.70784	0.772169	1.76654e-186	4.14579e-184	no	up	24596.6	22595.3	22375.6	35468.6	33780.5	35866.9	891.32	923.58	866.47	1149.16	1141.62	1238.37	893.79	1176.38	NP_003891.1(sequestosome-1 isoform 1 [Homo sapiens])	GO:0008104(biological_process:protein localization); GO:0005829(cellular_component:cytosol); GO:0016234(cellular_component:inclusion body); GO:0005080(molecular_function:protein kinase C binding); GO:0030154(biological_process:cell differentiation); GO:0016236(biological_process:macroautophagy); GO:0006468(biological_process:protein phosphorylation); GO:0019899(molecular_function:enzyme binding);…	K14381	SQSTM1	map04380(Osteoclast differentiation); map04218(Cellular senescence); map04217(Necroptosis); map05418(Fluid shear stress and atherosclerosis)	ENOG410XYAV(S:Function unknown)	ENOG410XYAV(Sequestosome 1)	PF16577.5(UBA_5:UBA domain); PF00569.17(ZZ:Zinc finger, ZZ type); PF00564.24(PB1:PB1 domain)	sp|Q13501|SQSTM_HUMAN(Sequestosome-1 OS=Homo sapiens OX=9606 GN=SQSTM1 PE=1 SV=1)	8878
ENSG00000049239	H6PD	hexose-6-phosphate dehydrogenase/glucose 1-dehydrogenase [Source:HGNC Symbol;Acc:HGNC:4795]	5590	2.4896	1.31591	1.76048e-185	4.08853e-183	yes	up	1980	1863.42	1821	4162	4061.02	4252.76	15.86	16.81	16.31	32.14	32.16	33.5	16.3267	32.6	XP_018866215.1(PREDICTED: GDH/6PGL endoplasmic bifunctional protein isoform X1 [Gorilla gorilla gorilla])	GO:0005737(cellular_component:cytoplasm); GO:0017057(molecular_function:6-phosphogluconolactonase activity); GO:0006739(biological_process:NADP metabolic process); GO:0005975(biological_process:carbohydrate metabolic process); GO:0043231(cellular_component:intracellular membrane-bounded organelle); GO:0004345(molecular_function:glucose-6-phosphate dehydrogenase activity); GO:0030246(molecular_fun…	K13937	H6PD	map00030(Pentose phosphate pathway)	COG0364(G:Carbohydrate transport and metabolism)	COG0364(Glucose-6-phosphate 1-dehydrogenase)	PF01182.20(Glucosamine_iso:Glucosamine-6-phosphate isomerases/6-phosphogluconolactonase); PF02781.16(G6PD_C:Glucose-6-phosphate dehydrogenase, C-terminal domain); PF00479.22(G6PD_N:Glucose-6-phosphate dehydrogenase, NAD binding domain)	sp|O95479|G6PE_HUMAN(GDH/6PGL endoplasmic bifunctional protein OS=Homo sapiens OX=9606 GN=H6PD PE=1 SV=2)	9563
ENSG00000144724	PTPRG	protein tyrosine phosphatase receptor type G [Source:HGNC Symbol;Acc:HGNC:9671]	9357	6.66996	2.73768	3.3289e-185	7.65132e-183	yes	up	217.96	191	196	1154	1198.38	1214	1.97	2.17	2.12	10.66	11.47	10.89	2.08667	11.0067	BAD93108.1(protein tyrosine phosphatase, receptor type, G precursor variant, partial [Homo sapiens])	GO:0016787(molecular_function:hydrolase activity); GO:0016791(molecular_function:phosphatase activity); GO:0007420(biological_process:brain development); GO:0010633(biological_process:negative regulation of epithelial cell migration); GO:0005615(cellular_component:extracellular space); GO:0006470(biological_process:protein dephosphorylation); GO:0004725(molecular_function:protein tyrosine phospha…	K16667	PTPRG		COG5599(T:Signal transduction mechanisms)	COG5599(protein tyrosine phosphatase)	PF00102.27(Y_phosphatase:Protein-tyrosine phosphatase); PF00194.21(Carb_anhydrase:Eukaryotic-type carbonic anhydrase); PF00041.21(fn3:Fibronectin type III domain); PF00782.20(DSPc:Dual specificity phosphatase, catalytic domain)	sp|P23470|PTPRG_HUMAN(Receptor-type tyrosine-protein phosphatase gamma OS=Homo sapiens OX=9606 GN=PTPRG PE=1 SV=4)	5793
ENSG00000112972	HMGCS1	3-hydroxy-3-methylglutaryl-CoA synthase 1 [Source:HGNC Symbol;Acc:HGNC:5007]	5350	2.43971	1.28671	2.35155e-184	5.34978e-182	yes	up	2978	2613	2340	5717	5761	5602	99.78	99.53	93.69	169.62	171.19	168.19	97.6667	169.667	AAH00297.2(HMGCS1 protein, partial [Homo sapiens])	GO:0005829(cellular_component:cytosol); GO:0008144(molecular_function:drug binding); GO:0001889(biological_process:liver development); GO:0014074(biological_process:response to purine-containing compound); GO:0014070(biological_process:response to organic cyclic compound); GO:0010142(biological_process:farnesyl diphosphate biosynthetic process, mevalonate pathway); GO:0004421(molecular_function:h…	K01641	E2.3.3.10	map00650(Butanoate metabolism); map00280(Valine, leucine and isoleucine degradation); map00072(Synthesis and degradation of ketone bodies); map00900(Terpenoid backbone biosynthesis)	COG3425(I:Lipid transport and metabolism)	COG3425(hydroxymethylglutaryl-CoA synthase activity)	PF08540.10(HMG_CoA_synt_C:Hydroxymethylglutaryl-coenzyme A synthase C terminal); PF01154.17(HMG_CoA_synt_N:Hydroxymethylglutaryl-coenzyme A synthase N terminal)	sp|Q01581|HMCS1_HUMAN(Hydroxymethylglutaryl-CoA synthase, cytoplasmic OS=Homo sapiens OX=9606 GN=HMGCS1 PE=1 SV=2)	3157
ENSG00000116852	KIF21B	kinesin family member 21B [Source:HGNC Symbol;Acc:HGNC:29442]	5519	4.13857	2.04913	2.55161e-184	5.74628e-182	yes	up	574	454	512	1933	1792	1904	4.87	4.53	4.78	15.89	15.53	16.29	4.72667	15.9033	NP_001239029.1(kinesin-like protein KIF21B isoform 1 [Homo sapiens])	GO:0005737(cellular_component:cytoplasm); GO:0005856(cellular_component:cytoskeleton); GO:0042995(cellular_component:cell projection); GO:0005515(molecular_function:protein binding); GO:0031410(cellular_component:cytoplasmic vesicle); GO:0008017(molecular_function:microtubule binding); GO:0007018(biological_process:microtubule-based movement); GO:0030426(cellular_component:growth cone); GO:003042…	K10395	KIF4_21_27		COG5059(Z:Cytoskeleton)	COG5059(Kinesin family member)	PF00225.23(Kinesin:Kinesin motor domain); PF00400.32(WD40:WD domain, G-beta repeat); PF16796.5(Microtub_bd:Microtubule binding)	sp|O75037|KI21B_HUMAN(Kinesin-like protein KIF21B OS=Homo sapiens OX=9606 GN=KIF21B PE=1 SV=2)	23046
ENSG00000198899	MT-ATP6	mitochondrially encoded ATP synthase membrane subunit 6 [Source:HGNC Symbol;Acc:HGNC:7414]	681	4.71249	2.23649	1.19378e-182	2.66153e-180	yes	up	7349.41	6512.08	6787.94	30768.1	29816.7	25522.1	1332.28	1370.39	1365.32	5228.39	5220.17	4707.07	1356	5051.88	ADI57507.1(ATP synthase F0 subunit 6 (mitochondrion) [Homo sapiens])	GO:0045263(cellular_component:proton-transporting ATP synthase complex, coupling factor F(o)); GO:0015986(biological_process:ATP synthesis coupled proton transport); GO:0007568(biological_process:aging); GO:0016887(molecular_function:ATPase activity); GO:0099132(deleted:old GO); GO:0046933(molecular_function:proton-transporting ATP synthase activity, rotational mechanism); GO:0055093(biological_p…	K02126	ATPeF0A, MTATP6, ATP6	map05012(Parkinson disease); map00190(Oxidative phosphorylation); map05010(Alzheimer disease); map05016(Huntington disease); map04714(Thermogenesis)	COG0356(C:Energy production and conversion)	COG0356(it plays a direct role in the translocation of protons across the membrane (By similarity))	PF00119.20(ATP-synt_A:ATP synthase A chain)	sp|P00846|ATP6_HUMAN(ATP synthase subunit a OS=Homo sapiens OX=9606 GN=MT-ATP6 PE=1 SV=1)	4508
ENSG00000160867	FGFR4	fibroblast growth factor receptor 4 [Source:HGNC Symbol;Acc:HGNC:3691]	2638	2.05003	1.03564	4.42606e-182	9.77021e-180	yes	up	4580	4102	4147	7769	7465	8021	154.19	155.87	152.69	235.61	234.94	253.61	154.25	241.387	XP_008956420.1(fibroblast growth factor receptor 4 isoform X1 [Pan paniscus])	GO:0005783(cellular_component:endoplasmic reticulum); GO:0016310(biological_process:phosphorylation); GO:0018108(biological_process:peptidyl-tyrosine phosphorylation); GO:0042593(biological_process:glucose homeostasis); GO:0010628(biological_process:positive regulation of gene expression); GO:0007169(biological_process:transmembrane receptor protein tyrosine kinase signaling pathway); GO:0030133(…	K05095	FGFR4, CD334	map04810(Regulation of actin cytoskeleton); map05200(Pathways in cancer); map04015(Rap1 signaling pathway); map04014(Ras signaling pathway); map04010(MAPK signaling pathway); map04550(Signaling pathways regulating pluripotency of stem cells); map04144(Endocytosis); map04151(PI3K-Akt signaling pathway)	COG0515(T:Signal transduction mechanisms)	COG0515(Serine Threonine protein kinase)	PF07714.17(Pkinase_Tyr:Protein tyrosine kinase); PF00069.25(Pkinase:Protein kinase domain); PF13927.6(Ig_3:Immunoglobulin domain); PF07679.16(I-set:Immunoglobulin I-set domain); PF13895.6(Ig_2:Immunoglobulin domain); PF00047.25(ig:Immunoglobulin domain); PF07686.17(V-set:Immunoglobulin V-set domain)	sp|P22455|FGFR4_HUMAN(Fibroblast growth factor receptor 4 OS=Homo sapiens OX=9606 GN=FGFR4 PE=1 SV=2)	2264
[truncated: 60,522 more rows]

## Sheet: Supplementary Table S5
Supplementary Table S5. General information of HCC patients.
Sequence ID	Sample	Age (year)	Sex	Edmondson-Steiner grade	AFM1 in urine (ng/L)	HBsAg	Cirrhosis
HQ25	AF-HCC1	67	M	III	30.9	+	Y
HQ26	AF-HCC2	58	M	III	24.9	+	N
HQ27	AF-HCC3	57	M	III	17.1	+	N
[truncated: 41 more rows]

## Sheet: Supplementary Table S6
Supplementary Table S6. List of qPCR primers
[truncated: 27 more rows]

[truncated: 1 more sheets: Supplementary Table S7]
